# Supplementary material for: Circulating miR-3659 may be a potential biomarker of dyslipidemia in patients with obesity
Source: J Transl Med. 2019 Jan 14;17:25. doi: 10.1186/s12967-019-1776-8 (PMC6332685; doi:10.1186/s12967-019-1776-8)
Supplement: Supplementary file 1 — Additional file 1. Additional tables. [file 12967_2019_1776_MOESM1_ESM.xlsx]

## Sheet: Additional Table S1
Gene	GSM1627740	GSM1627741	GSM1627742	GSM1627743	GSM1627744	GSM1627745	GSM1627746	GSM1627747	GSM1627748	GSM1627749	GSM1627750	GSM1627751	GSM1627752	GSM1627753	GSM1627754	GSM1627755	GSM1627756	GSM1627757	GSM1627758	GSM1627759	GSM1627760	GSM1627761	GSM1627762	GSM1627763	GSM1627764	GSM1627765	GSM1627766	GSM1627767	GSM1627768	GSM1627769	GSM1627770	GSM1627771	GSM1627772	GSM1627773	GSM1627774	GSM1627775	GSM1627776	GSM1627777	GSM1627778	GSM1627779	GSM1627780	GSM1627781	GSM1627782	GSM1627783	GSM1627784	GSM1627785	GSM1627786	GSM1627787	GSM1627788
A1BG	0.325215	0.334873	0.14246	0.173263	-0.0421867	-0.525041	-0.583647	-0.363468	-0.469527	-0.345796	-0.260818	-0.603366	0.02425	-0.0988064	-0.00108528	-0.0464926	-0.0652809	0.168517	0.0520821	0	0.116323	-0.173226	-0.391914	0.286905	0.187422	0.373374	0.164248	0.313095	0.160363	0.0941238	-0.0615501	0.206038	0.0206499	0.427554	0.288333	0.46226	-0.00819206	0.0590048	-0.0832615	-0.170115	-0.116323	-0.271092	-0.145609	0.0771647	0.289201	0.233895	0.1395	-0.0842257	0.126957
A2M	-0.0396729	0.140693	0.117746	-0.368635	-0.184536	0.3161	-0.104354	0.0700541	-0.015378	0.0188131	0.308089	0.27856	0.106894	0.0708027	-0.0473852	-0.104661	0.0167828	0.0874147	-0.0296078	-0.131353	-0.222617	-0.507864	-0.591249	-0.791745	-0.668569	-0.686247	-0.163705	-0.357189	-0.0591679	-0.859806	-0.464854	0.178883	-0.577642	-0.300696	-0.471181	0.166087	-0.411901	-0.214105	-0.339459	0.153707	-0.114521	0.158806	0.0191479	-0.201781	-0.151343	-0.105851	-0.304469	-0.632367	-0.314925
NAT1	0.245353	-0.222424	-0.0335269	-0.107703	0.491255	0.0908728	0.143936	0.101057	0.109108	0.396606	0.555533	0.533327	0.308576	0.230777	-0.269721	0.0507021	0.169117	0.364018	0.148149	-0.347218	0	0.0253835	-0.425877	0.00169849	-0.184575	-0.114268	-0.275765	-0.129209	-0.319665	-0.0326533	-0.121663	-0.14323	-0.292425	-0.244955	-0.149798	-0.0211987	0.0490026	0.330561	0.309805	0.193042	0.33923	0.104881	-0.00689745	0.0848417	-0.270889	-0.139439	0.0980763	0.0229034	-0.422956
NAT2	0.182999	-0.174005	0.119471	0.326856	0.633491	0.25596	0.833773	0.957951	0.317664	0.696921	0.53737	0.659261	-0.290801	-0.299079	-0.202699	0.163921	-0.3474	-0.106018	0.486918	-0.297111	0.06779	-0.300691	-0.417866	-0.0700345	-0.103231	-0.579354	-0.235871	-0.330511	-0.548599	-0.657747	-0.658727	-0.296742	-0.217422	-0.207575	-0.492979	-0.0459137	0.0700769	0.772228	0.403141	0.799024	0.313764	0.254049	-0.098177	-0.0636554	-0.0676198	-0.191537	0.265162	-0.42646	-0.538581
SERPINA3	-0.209657	-0.130847	0.563165	0.103616	0.267027	-0.149746	0.196809	0.516745	-0.082366	0.587929	0.35352	-0.136061	-0.206748	-0.289099	-0.301636	-0.366026	-0.131434	-0.237337	0.342357	-0.355019	-0.0627155	-0.633668	-0.885097	-0.316731	-0.254861	-0.300448	-0.347731	-0.22601	-0.403471	-0.515026	-1.06075	0.0561953	-0.269845	-0.206038	-0.453069	-0.133112	0.289779	0.321418	0.18875	0.31969	0.154194	0.35568	0.309431	-0.357631	-0.157825	-0.126918	0.117171	-0.958654	-0.370454
AADAC	0.0458097	0.0922356	0.213026	0.100835	0.651762	0.0376549	0.30292	0.668998	0.310224	0.923825	0.7367	0.820441	-0.336906	-0.491005	-0.214527	-0.0296907	0.272481	-0.159387	0.823174	-0.378567	0.0760355	-0.684863	-1.19253	0	-0.16511	-0.635905	-0.0899992	-0.370192	-0.981646	-0.35421	-1.52685	-0.41266	-0.412493	-0.857192	-0.182567	-0.592623	0.613126	0.524877	0.442602	0.508968	0.428672	0.591459	0.271155	-0.0802927	-0.424634	-0.36805	-0.211816	-0.630132	-1.12868
AAMP	0.0545054	-0.180863	0.145904	0.143223	0.10706	-0.244836	-0.104616	-0.102901	-0.103554	-0.150824	-0.116687	-0.0805769	-0.17509	-0.447128	0.0669136	-0.135247	-0.16668	-0.0235491	0.076829	0.0834799	0.420189	-0.210439	0.147471	0.348624	-0.0385828	0.231796	0.0702696	0.144547	0.293221	0.191638	-0.325242	-0.13881	-0.410542	-0.172697	-0.278246	0.141159	0.137556	0.0868874	0.0136814	0.0258198	-0.202991	0.0453062	-0.278159	0.184187	-0.126663	0.0547218	0.135875	-0.103364	0.213985
AANAT	-0.137759	0.261863	-0.0906334	0.126506	-0.197421	-0.0274558	-0.213741	-0.014019	0.118301	-0.0909781	-0.210393	-0.106455	0.141915	-0.161379	-0.21738	0.0518332	-0.271782	0.192599	-0.0360227	0.0941463	-0.285778	0.402717	0.248983	-0.0946426	-0.109827	0.0548372	0.292933	0.097723	0.511824	0.268684	0.493617	-0.226935	0.149845	0.256039	0.0466576	0.249045	0.0889192	0.034225	-0.182089	-0.1565	0.0359335	0.042872	-0.122278	0.0690355	-0.0626745	-0.0585971	0.285896	0.18525	0.0821943
AARS	-0.131646	-0.385035	-0.121107	0.234653	0.352161	-0.294115	0.327016	0.234042	-0.0446501	0.241827	0.231408	0.0992908	0.0957441	-0.426766	-0.313942	-0.154732	-0.207794	-0.11332	0.424138	-0.0996113	0.10865	-0.492086	-0.399756	-0.269676	-0.0393333	0.0712366	0.0302362	-0.062211	-0.363434	-0.422119	-0.545774	-0.106906	-0.321436	-0.344048	-0.46545	0.286344	0.174316	0.142048	-0.00723839	0.187817	0.261539	-0.132605	0.128078	-0.196357	0.147294	-0.170015	0.177474	-0.464638	-0.222757
ABAT	0.403838	-0.032856	0.492892	-0.0562506	0.172993	-0.403625	-0.0377312	-0.0216665	-0.324247	0.186307	-0.208621	-0.524767	0.183249	-0.199829	0.089675	0.152576	-0.0348463	0.0403185	-0.206095	-0.343364	0.126804	-0.608822	-0.817836	0.0441551	-0.108173	0.192265	-0.0865641	-0.0280886	0.0689354	-0.238432	-0.724407	0.00180626	-0.412627	0.127503	0.348219	-0.174812	0.154668	0.00971222	0.124116	0.138162	-0.0805998	0.00897884	-0.213911	-0.116976	-0.0406675	0.101187	-0.151429	-0.706967	-0.131982
ABCA1	-0.287071	0.287996	0.928393	-0.229122	0.0656929	0.0570183	0.748863	0.047102	0.147186	0.450829	-0.186001	-0.25039	-0.233983	0.572322	0.177918	-0.192307	0.0468483	0.465114	-0.0650015	-0.25283	-0.047348	-0.160161	-0.468979	-0.237714	-0.000565	0.151538	-0.091341	-0.0966778	0.385776	-0.29564	0.0167885	0.257804	-0.0855169	-0.354286	-0.425062	-0.431045	0.607589	0.0557232	-0.0412569	0.00607681	0.191584	0.564674	0.251246	0.0421991	0.301239	0.404239	-0.225494	-0.185071	-0.00974464
ABCA2	0.1563	-0.0441818	-0.0414171	0	-0.310549	-0.266881	-0.0607395	-0.265514	-0.193326	-0.401104	-0.36941	-0.340689	0.214969	0.211641	0.367032	0.346451	0.388397	0.223804	-0.330851	0.227162	0.257832	0.0380397	0.152289	0.368265	0.166055	0.351767	0.150922	0.151974	0.0548673	0.256475	0.285692	0.307593	0.193633	0.0494208	0.0961742	0.173305	-0.329485	-0.315713	-0.207489	-0.340626	-0.292922	-0.341791	-0.301822	-0.0305777	0.183661	0.233113	0.0686412	0.166348	0.316553
ABCA3	0.0104017	0.12133	-0.082355	0.0988312	-0.0898929	0.156494	-0.104359	0.170887	0.328328	-0.126137	-0.0456095	-0.27268	0.0585823	-0.076684	0.049221	0.180888	-0.119849	-0.0809612	-0.252453	0.179892	-0.00365257	0.0898933	0.129816	0.00337648	0	-0.120337	0.155522	0.112191	0.247877	0.276636	0.176904	0.0116391	0.18427	-0.0112729	-0.0681148	-0.161104	-0.0512772	0.0335221	0.260206	-0.363689	-0.0481296	0.154213	0.00492907	0.0126553	0.0851469	-0.140168	-0.122203	0.175794	0.190032
ABCB7	0.111697	-0.205691	0.0912909	-0.196109	0.382303	-0.274126	0.1394	0.0355115	0	0.312594	0.38333	0.210435	0.144866	-0.179098	-0.446683	-0.252108	-0.262788	-0.021348	0.306667	-0.448202	-0.0952592	-0.172786	-0.750965	-0.206599	-0.157542	-0.327621	-0.28921	-0.474379	-0.259676	-0.406525	-0.739457	-0.233963	-0.302585	-0.130731	0.031826	0.0891233	0.563096	0.278758	0.103093	0.143047	0.0451074	0.0469532	0.143937	-0.057488	-0.109527	0.0358896	-0.00281811	-0.553112	-0.456259
ABCF1	-0.016655	-0.12322	-0.175994	0.0179653	0.230884	-0.111327	-0.0347638	-0.00879717	0.176585	-0.0187545	-0.0428815	0.0709386	0.12533	0.131171	0.163412	0.243721	0.126875	0.253551	0.00680733	-0.181385	0.0361233	-0.260587	-0.224509	-0.0218534	-0.23666	-0.00483036	-0.00803757	0.0140772	-0.0584836	-0.105978	-0.46711	-0.0150018	-0.315332	-0.223351	-0.259027	-0.0364375	0.0387259	0.225303	-0.0167503	0.0634227	0.0458183	0.00366688	-0.00678635	-0.158659	-0.224005	-0.225162	0.0367832	-0.206587	0.0382137
ABCA4	0.140898	0.316062	0.0390315	0.104932	-0.187232	0.15986	-0.0980768	-0.115655	0.0141268	-0.154621	-0.0149217	-0.136858	-0.0629287	0.0170298	0.0377417	0.0308318	-0.15391	-0.172749	-0.0777683	-0.00615788	-0.0565343	0.180494	0.196045	0.0106044	0.0734653	0.100967	0.00888967	-0.0612459	0.0801744	0.0450339	0.183928	0.00878477	0.0378952	0.15929	0.0917644	-0.0713258	-0.0956087	-0.0507188	0.103025	-0.00286818	-0.100352	0	-0.0936475	-0.0274153	-0.108438	0.0109782	-0.0187554	-0.251239	0.0461025
ABL1	-0.00975418	0.0983648	0.172905	-0.0592561	-0.220069	-0.172925	0.032568	-0.137487	-0.17803	-0.193638	-0.137829	-0.102746	0.196324	0.427609	0.14816	0.14219	0.193635	0.0500546	-0.121899	0.0468731	0.134439	-0.212381	-0.0252385	0.0824838	0.335479	0.421858	-0.0255213	-0.0534425	0.162194	-0.185553	0.112705	-0.0339751	0.0323219	0.0684333	0.122758	-0.0714998	-0.107615	-0.0384154	0.0239201	-0.29186	-0.072619	-0.187607	-0.165164	0.0673752	0.0380249	0.414861	-0.197679	-0.150388	0.40257
AOC1	-0.291833	0.403215	0.409678	-0.46391	0.33657	0.135837	-0.484804	-0.354026	0.28682	0.204947	0.39132	-0.244823	-0.455814	-0.0754805	0.610751	-0.43316	0.19146	-0.108416	0.702168	0.226251	0.0308437	-0.0242338	-0.262821	-0.379389	0.280264	-0.30241	0.443878	0.0995378	-0.327365	0.688526	0.2159	-0.239865	0.164426	0.0987468	-0.261227	0	-0.224243	0.575966	0.613716	0.527346	-0.337702	0.244403	-0.333876	0.110101	-0.255653	-0.160364	0.0643058	-0.0254288	-0.314535
ABL2	-0.102682	-0.0579667	0.0204492	-0.142822	-0.128055	-0.0161896	-0.126951	-0.0112538	-0.0224719	0.0276518	0.0187821	0.209231	0.0666719	-0.0730224	0.0645695	-0.114529	0.0339875	-0.0619349	-0.154819	0.0377922	0.101815	0.0617213	0.054966	0.0086751	-0.0841255	0.0536737	0.0443525	-0.0739546	0.0419936	-0.142817	-0.127444	0.112371	-0.189259	-0.046874	0.0549898	-0.0893092	-0.232405	0.0532589	0.0475597	0.0850511	-0.138319	-0.0945311	-0.158403	0.0787716	-0.0336146	0.0682273	0.0568857	0.0779147	0.121578
ABO	-0.0925164	0.246028	-0.107284	-0.0765076	-0.0214696	0.176711	0.0338106	0.181362	0.308897	-0.0579734	-0.0231075	-0.0923181	-0.200301	-0.0982261	-0.142903	-0.0377789	-0.0806627	0.18051	0.00173712	0.0244913	-0.365469	0.0825849	0.163681	-0.121647	-0.00282431	0.0216651	0.00412703	0.0277882	0.181319	0.307121	0.274365	0.0402551	0.0857487	0.117442	-0.00135517	0.172351	-0.0632958	-0.109694	0.0701036	0.0749755	-0.058866	0.16208	0.0500779	-0.0799022	-0.150788	-0.236488	0.0433564	-0.0378046	0.03792
ABR	-0.0830994	-0.214864	-0.0743127	0.161399	-0.176083	0.195866	0.00315666	-0.130226	-0.085907	-0.227477	-0.154423	-0.0732279	0.10779	0.19271	0.0864391	0.205466	-0.096365	0.0749216	-0.0188708	0.212065	0.0181193	0.0451446	0.0686641	0.0743003	0.131986	0.340058	0.14043	-0.147065	-0.0738215	0.215426	0.219676	0.100031	-0.0610404	-0.113527	-0.018024	0.122693	-0.229409	-0.114386	-0.0567093	-0.0571213	0.0941057	0.0402336	-0.0867324	-0.224469	0.147753	0.0499387	0.281374	-0.0386825	0.262497
ACAA1	0.298699	0.296381	0.00781727	0.233439	0.159054	0.130311	0.255862	0.0152197	0.242672	-0.048667	0.0725193	0.0362349	-0.545019	-0.259902	-0.00203896	-0.278145	-0.155874	-0.629975	0.186367	-0.102024	0.409033	-0.375268	-0.437414	0.121615	-0.087533	0.427881	0.0961828	0	-0.121708	-0.119355	-0.396303	0.0192127	-0.201419	-0.055707	-0.0377989	0.430702	0.146633	0.292706	0.305765	0.159049	0.251677	-0.00572395	-0.141315	0.123301	-0.0231714	0.284998	-0.0727444	-0.300864	-0.0224848
ACACA	0.0499053	-0.402574	-0.362422	-0.0332789	0.169268	-0.236107	0.335251	0.0247216	-0.0214362	-0.0436525	0.0854421	0.403987	0.245601	0.0435104	0.0323501	0.329404	-0.0142016	0.179955	0.0429702	0.0640354	0	-0.257805	-0.0669951	-0.204184	0.271369	0.147797	-0.202037	-0.32261	-0.341368	-0.601502	0.00945997	0.128819	-0.0562015	0.123466	0.384105	-0.0720019	-0.0328293	0.122504	-0.0950999	0.045187	0.187068	-0.121922	0.120132	-0.378004	0.341846	-0.327147	0.0627766	0.435509	-0.0023675
ACACB	0.117058	0.0688648	0.0340204	-0.0505323	-0.153806	0.220401	0.393583	-0.425989	-0.224675	-0.253617	-0.221735	-0.011939	0.260887	0.380068	0.410341	0.361879	0.16075	0.279314	-0.223396	0.15661	0.0478258	-0.393206	-0.100677	0.144609	0.103476	0.503337	0.0261602	-0.115352	0.00145912	-0.321639	-0.305664	0.0273361	-0.180488	0.173717	0.0340805	-0.282158	0.059248	-0.0106468	0.00110054	-0.137747	-0.186439	-0.241717	-0.232526	-0.0125246	0.108974	-0.0329866	-0.0632553	0	0.465807
ACADL	-0.0218048	-0.0935125	-0.846684	-0.0110397	0.349034	-0.201512	-0.302876	0.118267	0.0491009	0.49866	0.489756	0.365622	0.141448	-0.129199	-0.0025177	-0.209252	-0.116522	0.446848	0.160516	-0.158262	-0.1222	-0.539522	-0.360356	0.0367899	-0.285351	-0.156687	-0.280869	-0.479457	-0.354475	-0.487766	-0.684614	-0.226489	-0.492989	-0.226153	-0.131495	-0.00993252	0.609305	0.36681	0.416244	0.152749	0.397133	0.436117	0.293305	0.350953	0.290761	0.0249872	0.143168	0.0850782	-0.719648
ACADM	0.242541	0	-0.192692	0.182575	0.463833	0.10288	0.411116	0.427485	0.121995	0.68901	0.292328	0.464504	-0.180604	-0.13131	0.0230713	-0.292226	-0.0269299	-0.183804	0.476505	-0.182734	0.0225163	-0.45635	-1.0395	-0.142788	-0.231861	-0.652303	-0.527118	-0.5317	-0.778812	-0.663649	-1.13822	-0.267935	-0.240981	-0.558965	-0.160523	0.1008	0.532742	0.230761	0.463078	0.379317	0.310798	0.320236	0.143694	0.100217	-0.0698919	-0.168123	-0.154408	-0.624754	-1.14279
ACADS	0.528568	0.526313	-0.029911	0.380713	-0.143752	-0.406967	-0.130924	-0.160803	-0.474786	-0.312396	-0.336126	-0.677385	0.295418	-0.047493	0.381154	0.490731	0.144727	0.552273	-0.104473	-0.157679	0.176826	-0.420975	-0.453894	0.194888	0.0836697	0.301687	0.323135	0.207496	0.0018816	0.0103025	-0.437098	0.279909	-0.287267	0.330348	0.480804	0.621438	-0.0400372	0.0222473	-0.143272	-0.201931	-0.176623	-0.386114	-0.284689	0.270346	0.00905132	0.156729	-0.0122356	-0.404234	0.0588179
ACADSB	0.22647	0.0784903	-0.00209141	0.0223646	0.641892	0.340299	0.244948	0.296289	0.273913	0.377091	0.203612	0.110002	0.223639	0.130913	-0.284185	-0.124331	-0.225822	0.0484676	0.132016	-0.298438	-0.110276	-0.623352	-0.968849	-0.333303	-0.168623	-0.469467	-0.271025	-0.486729	-0.436905	-0.565451	-1.1798	-0.384514	-0.484387	-0.301615	0.123049	-0.339719	0.647614	0.223717	0.264351	0.204402	-0.098072	0.14923	0.280812	0.219001	-0.611363	0.0909319	-0.383772	-0.79864	-0.672453
ACADVL	0.180915	0.0780029	0.362828	0.362609	-0.391955	-0.00662232	-0.50499	-0.47243	-0.377108	-0.272238	-0.148973	-0.0448599	-0.175808	0.0918484	0.221029	0.138257	0.264246	-0.355938	0.0793333	0.229464	0.390526	-0.000321	0.00832462	0.0680618	0.279236	0.439285	0.212821	0.140448	0.0432253	0.101418	0.0958672	0.120876	-0.0352907	-0.21532	0.232347	0.381493	-0.128427	-0.0777369	-0.102403	-0.364448	-0.226356	-0.206367	-0.644417	0.133657	0.25456	0.0279989	0.130218	-0.0415792	-0.0695124
ACAT1	0.286158	-0.157066	0.221931	0.379604	0.310533	-0.0538282	-0.025157	0.421918	0.0180426	0.573562	0.343606	0.415676	-0.141681	-0.471096	-0.222205	-0.0704222	-0.0522718	-0.106447	0.487662	-0.14078	0.0539427	-0.313292	-0.915669	-0.132586	0	-0.0650492	-0.176166	-0.328955	-0.86842	-0.655	-1.08686	-0.04531	-0.0329885	-0.306133	-0.339001	0.217731	0.442876	0.196292	0.269256	0.271246	0.274122	-0.0606279	0.169358	-0.163049	-0.0892973	-0.219984	0.199365	-0.639389	-0.710348
ACAT2	-0.457126	-0.254977	-0.417244	-0.344377	0.416669	-0.397815	0.667202	0.624058	0.659015	0.483362	0.917616	0.125251	-0.206016	-0.253003	-0.543264	-0.105844	-0.0601511	0.0381107	0.521847	0.330709	-0.104493	-0.823047	-0.209273	-0.144157	0.501819	-0.635801	-0.64659	-0.754215	-0.699181	-0.890841	-1.04516	-0.190991	-0.278961	0.834572	-0.267208	0.626504	0.347465	0.00789547	0.0772514	-0.151878	0.414951	0.722788	1.01105	-0.493752	0.665274	-0.283046	-0.22168	0.567106	-0.560917
ASIC2	-0.0388947	0.28143	-0.0684037	0.329321	-0.123703	0.00316811	-0.194313	-0.0392175	-0.105784	-0.199386	-0.198278	-0.092452	0.0185947	-0.0566201	-0.0474515	-0.00982428	0.0359111	-0.0592241	-0.03793	0.224041	-0.0102482	0.166946	0.177079	0.0616493	0.0676913	0.101307	0.118276	0.306585	0.0451946	0.302518	0.207494	0.0353432	0.196906	0.0905733	-0.0162916	0.099668	-0.0639997	-0.175932	0	-0.00241089	-0.216628	-0.0281868	-0.084332	0.121022	0.0781441	-0.0444775	0.276045	0.0460834	-0.0333915
ASIC1	-0.0998406	0.163608	0.20877	-0.167989	0	0.126106	-0.00215101	-0.0343342	0.334127	-0.0759573	-0.0896335	0.0662146	-0.0463648	0.00205326	0.0764995	0.06952	0.053834	-0.12095	-0.131269	-0.157472	-0.118402	-0.0333009	0.351929	0.0141487	0.175682	-0.0948501	0.325234	0.211774	0.210903	0.27128	0.351777	-0.0350218	0.0681205	0.0510621	0.0521555	-0.0533657	-0.0584364	-0.204294	0.0248175	-0.120197	0.104434	0.00931072	-0.0368891	-0.103976	-0.348846	-0.0811224	-0.0448165	-0.122528	-0.0770426
ACHE	-0.102994	-0.0445895	-0.0873942	-0.178003	-0.326571	0.350947	0.0226746	-0.145809	-0.196686	-0.237883	-0.172794	-0.325784	-0.0300441	0.0767212	-0.0993319	0.164126	-0.278774	-0.0424924	0	0.216972	-0.240019	-0.198725	0.350245	-0.13135	0.0912204	0.229008	-0.0357699	0.12811	-0.181923	0.193483	0.0152183	0.057435	0.00417423	0.302854	-0.00875425	-0.0173974	0.0564713	-0.0488005	-0.0458775	0.0482817	-0.0432296	-0.214816	-0.0274596	-0.0262527	0.0453591	-0.0499721	0.0990229	0.0789838	0.0480547
ACLY	0.027051	-0.0354476	-0.0674267	0.109417	0.117319	-0.543383	-0.0212121	-0.0541358	-0.413969	-0.153704	-0.165194	-0.0488277	0.0712461	-0.0490041	0.0788941	0.414801	0.0507116	0.419355	0.301191	0.147337	-0.0741959	-0.228162	-0.423793	-0.0719147	0.411339	0.0850277	-0.058044	0.00507975	-0.0519776	-0.299067	-0.232903	-0.135377	-0.043921	0.0460515	0.39644	0.145337	-0.152081	0.0587802	-0.290433	-0.201333	-0.0319996	-0.150828	0.153879	-0.252038	0.504833	-0.100814	-0.241808	0.0488219	0.191648
ACO1	-0.0401144	0.133635	-0.475556	-0.300713	0.130603	0.237825	0.400763	-0.0126715	0.160348	0.0958223	-0.00334168	-0.174478	0.225	0.269055	0.234206	0.25701	0.302155	0.345174	-0.0917921	-0.503577	0.161362	-0.568568	-0.481583	0.0388269	-0.222631	-0.227968	-0.487425	-0.464902	-0.219313	-0.273124	-0.738081	-0.103752	-0.327776	0.195824	-0.0150537	-0.115066	0.0984631	0.17385	0.0331058	0.149715	0.26719	-0.0840816	-0.0251331	-0.0315771	-0.247003	-0.0306149	-0.193044	-0.473656	-0.691582
ACR	-0.200825	0.545958	-0.14522	-0.285028	-0.0751729	0.343461	-0.073925	-0.106541	-0.0893149	-0.368614	-0.344137	-0.230516	0.0814586	0.286828	0.373065	0.199221	0.112175	0.124739	-0.197418	0.0695968	-0.0696797	-0.00220013	0.785321	0.115725	0.149725	0.105855	0.0836019	0.111284	0.355667	0.351187	0.258723	0.0405192	0.0537281	0.356376	0.159521	0.199616	-0.180385	-0.174326	-0.142206	0.151302	0.0121927	-0.0690694	-0.19168	0.103173	-0.0549541	-0.215981	0.0907197	-0.0712757	0
ACO2	0.138019	-0.0170832	-0.0754385	-0.0235815	0.0784655	-0.0977707	0.0019331	-0.227887	-0.261299	-0.0460129	0.0278807	-0.404061	0.0755033	0.0904636	0.199964	0.00264072	0.213125	0.332782	-0.137172	-0.472541	0.132427	-0.459451	-0.43407	0.214823	-0.0448437	-0.18048	-0.0592184	-0.0651617	-0.0877085	-0.209167	-0.386024	0.160819	-0.369167	0.149022	0.432163	0.266176	0.0222025	0.062541	-0.126821	0.135529	0.0796223	-0.212661	0.00270653	0.0307617	-0.0667143	-0.219817	-0.277668	-0.464423	-0.207275
ACOX1	0.255346	-0.125266	-0.164174	0.0457726	0.208172	0.383153	0.286965	0.164605	0.200943	0.306763	0.293108	0.295194	-0.175358	-0.154219	0.0389223	0.00978088	0.501626	0.102109	0.088973	-0.263843	0.152758	-0.393037	-0.842509	-0.0125685	-0.0729895	0.151283	-0.139498	-0.174523	-0.634712	-0.117339	-0.687362	-0.166065	-0.257788	-0.294118	-0.17567	0.143589	0.174589	0.168803	0.275809	0.142618	0.448927	-0.0514126	0.0481272	0.0216656	-0.0677557	0.0146437	-0.106159	-0.46482	-0.612709
ACP1	0.139163	-0.402088	0	0.0302258	0.341816	-0.122041	0.0555944	0.166413	0.0318403	0.418358	0.217155	0.193284	-0.134701	-0.409737	-0.0460405	-0.42924	-0.317265	-0.18202	0.0543928	0.00646877	0.0752115	-0.319466	-0.736169	-0.0566902	0.0671997	-0.435655	-0.290086	-0.198541	-0.409046	-0.301339	-0.54749	-0.229812	-0.0855293	-0.133268	-0.0829773	0.21132	0.362706	0.14658	0.0982981	0.233852	0.242948	0.136765	0.199538	0.00256729	0.00958538	0.145203	0.0620041	-0.0808907	-0.683342
ACP2	0.23256	0.18523	-0.16504	0.00829411	0.0952263	-0.225745	-0.0319519	-0.113585	-0.0972424	-0.146266	-0.236283	-0.257737	0.290446	-0.108163	0.321913	0.389993	0.316197	0.18169	0.0827866	-0.109692	0.241569	-0.314627	-0.726247	0.175784	-0.296168	0.198791	0.0553236	0.209405	-0.0693369	0.0480452	-0.423569	0.0848084	-0.110862	0.275072	0.0951309	-0.0363102	0.0652819	0.121468	-0.0317431	0.0813875	0.180745	-0.150474	-0.10066	-0.055582	-0.0396137	0.086462	-0.0670204	-0.133306	0.1421
ACP5	0.257967	-0.197896	-0.302329	0.126567	0.359439	0.159594	-0.0834103	0.017652	-0.0584598	-0.232276	-0.347283	-0.414463	-0.119444	-0.255353	-0.164796	-0.00792694	-0.362206	0.229761	-0.0673842	-0.345296	-0.187797	0.0177546	-0.617724	0.221713	0.0560546	-0.270254	-0.198849	0.0179749	-0.163823	-0.179263	-0.299977	-0.25864	-0.286611	0.483736	0.07969	0.154667	0.385111	0.496848	0.272158	-0.0583448	-0.117918	-0.173805	-0.0543203	-0.242156	-0.301176	0.14651	0.107331	-0.192976	0
ACPP	-0.0887694	0.146964	-0.11635	-0.0509529	-0.0396795	0.189874	-0.00724745	-0.0787139	-0.0565639	0.0855079	-0.029532	-0.10318	0.0265684	0.000855	-0.122622	0.162315	0.258372	0.198277	-0.0664701	0.0846524	-0.0229554	0.0658545	0.180099	-0.0160103	0.102888	-0.033649	0.184062	0.277665	0.040132	0.105929	0.162473	-0.135855	-0.258444	-0.00674152	-0.0181804	-0.0968819	-0.0991082	0.132765	0.0525336	-0.109288	-0.0815926	0.0754209	0.00329065	-0.00205231	-0.00503302	0.0696578	0.0201974	0.0381374	0.155751
ACRV1	-0.0075388	0.177833	0.0454149	-0.0426078	0.0107818	0.238305	-0.00960207	0.0409331	0.0349131	-0.0703649	-0.0413346	-0.00134134	0.0699382	-0.0744038	0.0843472	-0.0774088	-0.0255294	0.0609937	-0.0714212	-0.162348	-0.0949888	-0.0530767	0.270921	0.000908	-0.0906472	-0.0853047	-0.0554733	0.0690889	0.0421619	0.0705967	-0.0881839	-0.0883584	0.153719	-0.0881839	0.0716281	0.0146723	0.102728	-0.0145297	-0.0947747	0.0774484	-0.012857	0.170937	0.0348067	-0.0179491	-0.0134954	-0.152397	-0.0348635	0.0765963	-0.0184503
ACTA1	0	0.465425	0.0104914	0.0441394	0.0379949	0.196505	0.0128856	-0.174227	-0.0473938	-0.216349	-0.0104342	-0.150491	-0.0680089	0.137916	0.0918159	-0.0517979	0.00838995	-0.0157714	0.0103574	-0.0400639	-0.276845	-0.10965	-0.0695391	-0.143278	0.0238304	-0.0729446	-0.0396719	0.0694485	-0.106661	-0.124102	0.0732245	0.0200863	0.193858	0.111161	-0.0663323	0.19309	-0.264919	0.0518002	-0.0517373	-0.156885	-0.120272	0.000528	-0.00797033	-0.102815	-0.162323	-0.122675	-0.34932	-0.208627	0.0662212
ACTA2	-1.25894	-1.30755	0.979403	-0.509425	-0.606188	-0.831936	0.0778942	-0.23964	-0.425225	-0.448943	0.258124	-0.826045	0.959005	0.494307	-0.956591	0.0788908	0.321653	0	-0.361211	0.326938	-0.354788	-0.307387	0.246305	-0.910999	0.111769	-0.73779	0.409943	0.437993	0.343623	-0.189583	-0.332734	-0.10184	-0.601856	-0.292047	-0.643123	-0.553383	-1.13308	-0.368182	-0.823667	-0.788647	0.413697	0.479212	0.748186	0.136717	0.832734	0.300998	-0.91293	-0.537855	0.453001
ACTB	0.202876	0.145596	0.126141	-0.0116787	0.0334311	0.109208	0.183151	-0.248575	-0.349165	-0.0853567	-0.15626	-0.491715	0.64502	0.63705	0.373197	0.622143	0.582522	0.317686	-0.123238	-0.18104	0.29002	-0.17237	-0.46831	0.0708504	-0.154107	0.158324	-0.0288715	-0.0237455	0.0448761	-0.263874	-0.618609	0.0571146	-0.23198	0.347634	-0.0589972	0	-0.160264	-0.126028	-0.25464	-0.00676441	0.0185604	0.0350714	-0.0479488	-0.0696316	0.0278864	0.112934	-0.128521	-0.515611	0.0234699
ACTC1	0.0781035	-0.15072	-0.00925541	-0.0999732	0.048914	-0.0142989	-0.0976562	-0.171752	0.0370994	-0.0313892	-0.132549	0.0282202	-0.016089	-0.0111008	0.240597	0.111801	0.139606	-0.14974	-0.0265245	0.0891938	-0.1358	-0.100754	-0.0390711	-0.0584116	0.00513363	-0.261835	0.0475888	0	-0.135728	-0.0644212	-0.153185	0.0140967	0.198253	0.21967	0.0424738	-0.0449104	-0.11796	-0.194245	0.0685234	0.00920963	-0.135212	-0.0681949	0.0267043	0.0143738	0.0212512	-0.147144	-0.0312166	0.110291	0.111353
ACTG1	-0.265383	-0.453546	0.490841	0.145858	0.0813627	-0.291425	0.153133	0.0496922	-0.53517	0.0870075	0.248324	-0.251958	0.601629	0.50966	0.024518	0.348159	0.222829	0.552098	0.16712	-0.147927	-0.0399351	-0.57398	-0.701702	-0.00012	-0.133437	-0.298744	0.153591	-0.190348	0.000586	-0.404318	-0.25645	-0.238501	-0.0455646	0.130934	-0.249903	-0.0821934	-0.0193996	0.446285	-0.208476	0.0819654	0.281882	-0.000344	-0.0260897	-0.22133	0.150517	-0.139688	-0.322758	-0.59915	-0.246586
ACTG2	-0.379005	0.311215	1.17957	-0.069437	-0.198945	-0.0107312	-0.0739756	-0.0222893	-0.316466	-0.190328	0.0374441	-0.388865	0.186574	0.236892	0.0673943	-0.0455561	0.0662837	0.261776	-0.235767	0.0403671	-0.0235162	-0.0728154	0.163651	-0.0665102	-0.00745487	0.0420918	-0.00332928	0.199798	0.142599	0.050415	0.36375	0.0872059	-0.0222497	-0.0568452	-0.248161	-0.144863	-0.149862	0	-0.219691	-0.137485	0.144226	0.0862842	0.344998	0.0389819	0.0568681	0.0127754	-0.183417	0.0498543	0.612874
ACTN4	-0.0290833	-0.444017	-0.184832	-0.115944	0.226673	-0.267823	0.387301	-0.0965567	-0.285732	0.0892687	0.00462055	-0.0229626	0.0319424	0.0319443	0.0286179	0.0589762	0.148877	0.261844	0.0276194	-0.252113	0.016366	-0.683926	-0.464598	0.0842781	-0.15936	0.112146	-0.00414276	-0.112254	-0.0593386	-0.0106153	-0.366343	-0.28863	-0.301444	-0.11678	-0.138952	-0.135869	0.11657	0.38031	0.136548	0.313092	0.337398	0.035059	0.0776749	-0.20282	-0.176527	-0.21792	-0.280782	-0.545609	-0.0458422
ACTL6A	0.0195818	-0.320397	-0.0347142	-0.0478826	0.197468	0.0204191	0.045867	0.253206	0.000281	0.275506	0.172036	0.116491	0.0942102	-0.119363	-0.385304	-0.325733	-0.127264	0.0241766	0.240561	-0.0384231	0.0227375	-0.311168	-0.462116	0.248467	-0.25882	-0.113475	-0.287663	-0.343266	-0.239793	-0.37661	-0.655208	-0.25407	0.0208807	-0.385988	-0.167061	-0.0605268	0.141076	0.13544	0.0547042	0.0290151	0.329284	0.135714	0.0019598	-0.0406904	0.134202	-0.160389	0.0880632	-0.341768	-0.10921
ACTN1	0.0146704	0.163253	0.453384	0.125221	-0.0860596	0.162848	-0.149272	0.335608	-0.366438	0.192991	-0.0470028	-0.0387259	0.125992	0.00568295	0.00133514	0.116739	0.182998	-0.0742807	0.061388	-0.0970945	0.370182	-0.177197	-0.137435	-0.228525	-0.157458	0.17841	-0.143305	0.0952263	0.103891	-0.171669	-0.261707	0.236269	-0.134127	0.0561962	-0.298766	0.189992	-0.215116	-0.134102	0.188311	0.115115	0.0891399	0.0891161	-0.1225	-0.0355282	-0.107935	-0.103452	-0.0638256	-0.31074	0.0290232
ACTN2	-0.122639	-0.0358748	-0.113205	0.0332041	-0.0357947	0.0713668	0.0172839	-0.0423689	0.00186253	0.0572233	0.0363917	0.00623751	-0.124971	-0.0617967	-0.108694	0.0650711	0.00604153	0.197053	-0.188635	-0.110873	0.000842	-0.00430775	0.230164	-0.0219927	-0.204058	-0.119175	-0.0010376	0.25548	0.0456471	0.0138149	0.0709043	0.111702	0.0682964	0.137002	-0.0591493	0.0407605	-0.0032568	-0.0490375	-0.0271597	-0.0979528	-0.0998421	0.126545	0.0975156	-0.0688691	0.032825	-0.144849	-0.128926	-0.105127	0.214344
ACTN3	-0.0410247	0.208907	-0.138479	0.0825529	-0.080873	0.295521	-0.0834465	-0.159573	-0.0420909	-0.205352	-0.122597	-0.194934	-0.298609	0.0999928	0.135094	0.185145	-0.0383735	0.124362	-0.138899	0.0316625	-0.141464	-0.059144	0.0250626	0.208704	0.140193	-0.0171323	0.181654	-0.0765982	-0.00270414	0.200226	0.0607719	-0.0601463	0.0963645	0.230467	0.165359	0.185772	-0.0994439	-0.244597	-0.0721769	-0.162721	-0.0235815	0.0424461	-0.208128	-0.164967	-0.0688233	-0.155225	-0.0951743	-0.130144	0.0277085
ACVR1	0.207508	0.129151	0.0504274	0.0138488	0.263841	-0.221721	0.0554852	0.122359	0.00871181	0.128884	0.0800338	0.256504	0.63714	0.285347	-0.0441265	0.231548	0.283388	0.405579	-0.0994129	0.0689259	-0.0136552	-0.0430326	-0.196781	0.160297	0.0928512	0.216527	0.106215	-0.0174808	0.480973	-0.108412	-0.0913076	-0.152616	0.012744	-0.249751	-0.354401	-0.114084	0.0295548	0.153437	-0.0943289	-0.16222	0.0324454	0.0300531	-0.00461674	-0.0589004	0.121296	0.196883	0.138332	0.284554	-0.0801296
ACVR1B	0.0402885	-0.205982	0.0243373	0.091507	0.0406723	-0.189807	-0.136108	0.0105824	0.0103359	0.211545	-0.0339646	-0.085587	0.0654683	-0.0765195	0.321846	0.248316	0.133849	-0.0307055	0.239119	0.213297	0.29058	-0.156446	-0.266398	0.16826	0.166045	0.290122	0.0704107	-0.0675888	-0.157604	0.178692	-0.408038	-0.341125	-0.149511	-0.162878	-0.261656	-0.150819	0.00497198	0.296842	0.287053	0.101572	0.0659161	-0.244723	-0.063129	-0.120618	0.222993	-0.0358963	0.124206	0.00282288	-0.107994
ACVR2A	-0.141031	-0.282682	0.113492	-0.0662866	0.142835	-0.245163	0.0524564	0.153373	0.190886	0.317952	0.395826	0.331413	0.159801	-0.0322471	0.103759	-0.171338	-0.0921855	0.101717	0.339043	-0.107439	0.0483503	-0.320473	-0.366788	-0.139369	-0.0428791	-0.0677853	-0.125126	-0.38488	-0.196452	-0.161471	-0.562067	-0.354197	-0.133625	-0.346682	-0.268231	-0.139825	0.0846801	0.239271	-0.00821352	0.129995	0.153714	0.0465837	0.232069	-0.205302	-0.0339718	0.252452	-0.213671	-0.156843	-0.427062
ACVR2B	0.0938053	-0.0252857	0.285398	0.0167608	-0.0205975	-0.10028	-0.0655475	-0.182828	-0.0724187	-0.214146	-0.0656061	-0.370054	0.343032	0.163187	0.331693	-0.216911	0.182407	-0.0230293	-0.117074	-0.0107589	0.523831	0.153422	0.604421	0.0901876	0.350711	0.459135	0.183852	0.301774	0.352819	0.104487	0.444971	0.0190864	0.0822268	0.0499363	-0.0224962	-0.00384283	-0.313065	0.152039	-0.237823	-0.431393	-0.141903	-0.0159588	-0.0183907	0.059576	0.165426	0.524196	0.0436001	0.176292	0.308084
ACVRL1	0.140761	0.160355	-0.15399	0.142679	-0.175335	0.00425196	-0.256836	-0.000146	0.0819788	0.13321	-0.260128	-0.115677	-0.076983	0.0244727	0.330159	0.0740309	-0.000326	0.140168	-0.0663686	0.0505877	-0.0147314	0.15759	0.11444	0.0859475	0.0218143	0.132405	0.0199943	0.35674	0.250985	0.328991	-0.0764937	0.158843	0.167737	0.17802	-0.0772362	-0.0660996	-0.0748105	-0.030654	-0.0608234	-0.217132	-0.143812	0.000299	-0.08845	0.0353632	0.0198674	0.0212221	0.0279307	0.0292144	-0.0358906
ACY1	0.722263	0.26314	-0.213521	0.312312	0.43041	-0.322734	-0.0436049	-0.0825109	-0.370132	-0.22602	-0.147517	-0.20564	0.0556564	-0.351179	-0.0705357	0.0274162	-0.176009	-0.0776949	0.43573	-0.311914	0.210906	-0.566685	-0.726312	0.281547	-0.236771	0.529177	0.25483	0.0382824	-0.281694	0.113249	-0.526655	-0.128972	-0.301234	0.348908	0.398514	0.434386	0.406025	0.455842	0.135584	0.215234	-0.00616646	-0.419281	0.0512409	-0.0494537	-0.225745	-0.028677	0	-0.469187	0.0998144
ACYP1	-0.170849	0.0410352	0.0967283	0.0132451	-0.118212	-0.164278	0.230723	0.0660825	-0.175846	0.17171	0.131647	0.0469022	-0.166131	-0.348123	-0.0122595	-0.16297	-0.401309	-0.219831	0.100164	0.126709	0.0289521	0.248371	0.319066	-0.309678	0.0464311	-0.0741458	0.102944	-0.111285	0.0358052	0.0475698	0.136972	-0.114842	-0.0464959	0.0356169	-0.0810032	-0.0970263	-0.0506096	0.028533	-0.0778418	-0.00180054	-0.0516839	0.0304127	0.084806	0.0153842	-0.0156403	0.136529	0.0143399	0.127355	0.108131
ACYP2	0.0525894	0.110861	-0.0141764	0.203131	0.104127	0.0302677	0.259945	0.570156	-0.223326	0.287368	0.327501	0.266191	-0.026134	-0.321912	0.0457764	-0.0821395	-0.0134211	-0.105862	0.238699	-0.133268	0.284092	-0.200854	-0.224808	-0.117599	-0.196239	-0.0567951	0.0839868	-0.101068	-0.304789	-0.0458651	-0.113459	0.0344315	-0.0679655	-0.150816	-0.168893	0.0187459	0.206915	0.125033	0.0775657	0.182848	0.169119	0.0664911	0.179083	-0.184962	-0.21205	0.0805454	0.0167828	-0.145242	-0.167647
ADA	0.141087	0.260213	0.15791	-0.0820179	0.103105	0.231999	-0.0267086	0.0784764	0.251997	0.00553083	-0.225094	0.138584	0.00125265	0.0692983	0.041647	0.0903645	-0.016654	0.0469275	0.222151	-0.325526	-0.0653224	-0.139369	-0.0259795	-0.134397	0.0224237	-0.226241	-0.320275	-0.0178757	-0.16274	-0.101769	-0.0110655	0.0716066	0.0685739	0.193839	0.0392637	0.00646782	-0.164172	0.174407	-0.0160432	0.312915	-0.119823	0.0551758	0.232167	-0.11292	0.179611	-0.12924	-0.213567	-0.00639296	-0.00997543
ADAM8	-0.00117254	0.483969	0.104964	-0.218383	-0.162109	0.248696	0.0728421	-0.080081	0	0.122056	-0.192714	0	0.0187502	-0.0354242	0.230197	0.108728	-0.060853	-0.114499	0.0562143	-0.356772	0.00635243	-0.200122	-0.0965629	0.0781417	0.0361824	-0.0591512	0.0219083	0.051899	-0.224296	-0.168498	0.357079	-0.00314474	-0.00213814	0.0905523	-0.00203514	0.150751	-0.0431762	-0.00531435	-0.0378265	-0.0346885	-0.153909	0.0497079	-0.0573502	0.0308967	0.0611362	0.0032711	-0.166001	0.38298	0.0843239
ADAM10	-0.113565	-0.13577	0.0499468	-0.108986	0.466201	-0.0287075	0.233093	0.249375	0.12358	0.701491	0.441062	0.426891	0.275239	-0.0687885	-0.201617	-0.150086	-0.0329256	-0.109921	0.350865	-0.0747023	-0.100863	-0.168983	-0.601442	-0.0129042	-0.113965	-0.514087	-0.389728	-0.399258	-0.231807	-0.258263	-0.606218	-0.4082	-0.149153	-0.34022	-0.199268	-0.200263	0.361826	0.391849	0.29525	0.41983	0.116867	0.429482	0.310545	-0.302789	0.212762	0.0969486	-0.205713	-0.325052	-0.448675
ADAR	0.00635052	-0.068881	-0.106361	-0.0245533	0.0372276	0.113062	0.40518	0.283887	-0.00210094	0.334349	0.177267	0.0639038	0.129436	0.375317	0.120711	0.298058	0.369164	0.39688	0.156168	-0.0454273	0.172882	-0.0115862	-0.203558	0.107881	-0.22008	0.18647	-0.0139742	-0.0236673	-0.226003	-0.197967	-0.325038	-0.0576963	-0.0131607	-0.0637789	-0.338987	-0.159603	-0.333909	-0.0235958	-0.111367	-0.0811157	-0.255535	0.128322	0.0672426	-0.219787	-0.0741415	0.174069	-0.0854569	-0.479848	0.267563
ADARB1	0.0513196	0.0803561	0.0145216	0.125785	-0.118625	0.059258	-0.0991306	-0.1244	-0.00800753	-0.127264	-0.198316	0.0612192	0.0793323	0.0346451	0.353128	-0.179445	0.0435677	0.139203	-0.110117	0.110066	0.00831509	0.104444	-0.193957	0.240455	0.137807	0.223211	0.0642796	0.0208068	0.119423	0.00309467	-0.0620475	0.097209	0.150442	-0.00474501	0.0491705	-0.0233803	-0.14397	-0.194204	0.0143399	-0.0488882	-0.173322	-0.177615	-0.282022	-0.0704169	0.0472622	0.0889702	-0.0791922	0.0276432	0.238754
ADARB2	0.172549	0.190434	-0.0184979	0.248746	0.051332	0.478784	0.139853	0.129882	0.112091	0.0231218	0.0478172	0.115254	-0.0889516	-0.0416288	0.0167875	-0.218251	0.0588431	0.0206351	0.030561	0.0326428	-0.263978	-0.0116811	-0.284933	-0.0375962	0.0818524	0.0297322	0.00393629	-0.150003	0.147717	0.0991616	0.161738	0.0356689	0.232433	0.304749	-0.0254569	-0.0342679	-0.059	-0.0170374	0.144883	0.138367	-0.030715	0.0567832	0.181909	0.0621934	-0.329793	-0.0878167	-0.174424	-0.0571904	-0.00307035
ADCY1	0.0691657	0.300309	0.00603008	-0.117858	0.000661	0.127305	-0.0107684	-0.332776	0.0418859	-0.192998	0.0320053	-0.184461	0.0638685	-0.0778179	0.0202312	0.147661	0.159389	0.0911007	-0.102376	0.122937	0	-0.0225458	0.150066	0.0898747	0.405912	0.167664	-0.0928674	0.18386	0.116138	0.0285664	0.289131	0.143305	-0.135132	0.188765	0.42225	-0.0178642	-0.0881119	-0.0760102	0.118989	0.0217805	0.100049	0.232399	0.123038	0.187891	0.0221314	0.327394	-0.0402861	-0.276471	0.134853
ADCY2	0.0701437	0.107432	0.156832	0.110627	-0.054884	-0.0211759	-0.114201	-0.0704598	0.0589366	-0.0776472	-0.0527544	-0.131618	-0.253526	0.0166512	-0.00102186	-0.0164466	-0.00319862	-0.225476	0.154168	-0.199835	-0.116841	-0.100083	0.161524	-0.0500851	-0.116103	-0.179586	0.139534	-0.130778	-0.0345626	-0.00523949	-0.0519552	-0.00523949	0.228294	-0.0445199	0.0204897	0.107838	0.0589299	-0.00125361	-0.0310311	0.0196424	-0.139172	0.0640559	-0.00410032	0.0686288	-0.071733	-0.0900149	-0.00625372	-0.0165071	-0.0527134
ADCY3	-0.153185	0.0811467	0.0612497	-0.105851	-0.299511	0.021142	-0.100612	-0.0547066	-0.00722218	-0.280274	-0.0524054	-0.241197	-0.184824	0.153913	0.039813	0.32716	0.104939	-0.179803	-0.223104	0.368976	0.127415	0.0802312	0.284402	0.168772	0.273106	0.14866	0.0708966	0.146265	0.159864	0.170194	0.423897	0.196112	-0.0307107	0.0620813	-0.127258	0.197952	-0.381814	-0.184202	0.0746102	-0.160872	0.0947328	-0.163038	-0.268363	0.0247951	-0.0268221	0	-0.10409	0.0829945	0.293135
ADCY5	-0.0242567	0.414612	0.280319	0.0656114	-0.248507	-0.269169	-0.214518	-0.232052	-0.104867	0.0254807	0.00232172	-0.0977621	0.415327	0.537672	0.0620284	0.241364	0.338151	-0.0139418	-0.285742	0.48871	-0.0430851	-0.0821362	-0.0644317	0.165238	0.163446	0.301857	0.0118055	0.401831	0.457368	0.290139	0.179645	0.320575	0.0643559	-0.317776	-0.0500369	0.00508785	-0.238211	-0.347827	-0.315403	-0.179581	0.0190158	-0.140024	-0.0736556	0.150508	-0.0595784	0.35888	-0.112249	0.141773	0.579993
ADCY6	0.208114	0.120848	-0.00068	0	-0.214336	-0.0401115	-0.0876861	-0.327228	-0.148621	-0.262658	-0.114748	-0.0490842	-0.0531735	-0.0381069	0.279847	0.0533586	0.188113	0.0118675	-0.139792	0.0693583	0.136785	0.175807	0.257995	-0.0125289	0.192606	0.383803	0.0314894	0.208112	0.227384	0.0552373	0.0466628	0.161994	-0.0342207	0.132183	0.116257	0.0405111	-0.22882	0.00120163	0.141146	-0.224499	-0.0224233	-0.117166	-0.161103	0.0953417	0.213233	0.0219207	0.0262017	0.18084	0.145613
ADCY7	-0.106987	0.191566	0.229992	0.0288429	-0.147589	0.0312085	-0.0159621	-0.0307527	0.209076	0	-0.0788493	-0.0986195	0.0626903	0.0174122	0.0820441	-0.0335107	0.199311	-0.0196948	-0.108645	0.148192	-0.00944996	0.236122	-0.126976	0.0828195	0.134892	0.194636	0.115909	0.196372	-0.108823	0.135616	0.120486	0.118181	-0.0324283	-0.220868	-0.0531597	-0.160423	-0.154098	0.0337443	-0.123572	-0.128558	-0.00981903	0.121158	-0.180169	0.0835242	0.176079	0.166975	0.119547	0.0255938	0.110064
ADCY8	-0.0876975	0.0313554	-0.00270653	-0.112003	0.102087	0.112175	0.0644803	0.0481691	0.297639	-0.172608	0.0737152	0.0195069	0.0434899	-0.0843472	0.227588	0.264895	0.0595593	0.154424	-0.0542731	-0.0498042	-0.0407782	-0.136437	0.461542	-0.0641899	-0.0456691	-0.109815	0.0404644	-0.0224242	-0.084137	0.0498719	-0.108019	-0.0226202	0	0.181193	0.0263276	-0.217819	0.00857639	-0.00328731	0.108733	0.162095	0.138409	0.353072	0.0564718	0.066639	-0.124482	-0.12349	-0.0804181	0.0472417	-0.0339289
ADCY9	0.0710597	-0.0624113	0.188387	0.182783	-0.219847	0.114322	-0.140189	-0.345806	-0.103598	-0.370198	-0.46372	-0.0872931	0.313452	0.232308	0.102171	0.20005	0.106142	0.0737004	-0.273642	0.166753	0.185374	-0.228966	0.113643	0	0.0503502	0.551265	0.28159	0.271291	0.352763	0.0787244	0.0212941	0.197878	-0.00774717	-0.00371647	0.257491	-0.1141	-0.33826	-0.269293	-0.248739	-0.307242	-0.297277	-0.444811	-0.288306	0.0413942	0.248872	0.367111	-0.166252	-0.0501676	0.346151
ADCYAP1	-0.0159521	0.179658	0.0116477	0	-0.0774322	-0.0172319	0.104554	-0.106392	0.153779	-0.0793991	-0.0753613	-0.0439606	0.109524	0.218389	0.0904112	0.035717	-0.0341148	0.035018	-0.189682	-0.0375748	0.0196905	-0.00820255	0.296161	-0.0656686	0.168351	0.124385	0.303914	0.0374789	-0.0230031	0.00679922	0.252013	0.131639	-0.0503783	0.126521	0.00514364	0.034596	-0.124891	-0.12893	-0.115016	-0.0624762	0.106017	0.219435	-0.0696726	-0.0368819	-0.200265	-0.0770678	0.0256486	0.0438557	0.0879087
ADCYAP1R1	-0.157541	0.57465	-0.152791	-0.0199432	0.0280132	0.380584	0.387291	-0.107219	-0.108769	0.0752807	-0.0381613	-0.0142517	0.265447	0.415243	-0.0175061	-0.0928998	0.343136	-0.165354	-0.0268016	0.191487	-0.267253	-0.262158	0.581548	0.0343242	0.204623	0.160369	-0.329802	0.208151	0.016499	-0.0343695	0.251665	-0.00520325	-0.16834	0.145509	0.0555987	-0.35288	-0.217451	0.29585	-0.227047	0.109894	-0.229997	0.247009	0.0106034	0.122113	0.204508	-0.253989	-0.15363	-0.291873	-0.226708
ADD1	0.00653553	0	0.036993	-0.0416431	0.000346	-0.0971127	0.159657	-0.134628	-0.138587	0.0997829	0.0447397	-0.00383377	0.312504	0.471865	0.446719	0.293465	0.476071	0.292764	0.0667372	0.0750303	0.18305	-0.289053	-0.458395	0.0162821	-0.0686665	0.215882	-0.120107	-0.0604067	0.0403633	-0.0570021	-0.372372	-0.114546	-0.0695047	-0.189966	-0.162623	-0.124727	-0.116868	0.126337	-0.0845518	0.0547152	0.0777788	0.0511284	0.0230608	-0.0702248	0.00544548	0.113376	-0.191985	-0.196782	0.0379677
ADD2	0.489218	0.128082	0.188665	0.102086	-0.0926337	0.264156	-0.207231	-0.280048	-0.0378742	-0.0464597	-0.121625	0.0136724	-0.136608	-0.53415	-0.145866	0.0705419	-0.445083	0.00542211	0.129822	0.125969	-0.0111594	-0.0723829	0.0216851	-0.149724	0.0295844	-0.026968	0.0491872	-0.0323768	0.0404959	-0.00127077	0.078125	0.311706	0.136493	0.0520062	0.0629602	0.290466	0.141531	0.095746	0.0422163	-0.10697	0.0690675	-0.0163574	-0.104098	0.0497947	-0.233064	-0.0805707	0.136843	-0.00341845	0.079701
ADD3	0	0.00937653	0.231985	-0.0872064	0.22665	0.165069	0.319145	0.197664	0.537664	0.602849	0.413133	0.301467	0.221724	0.161272	-0.229157	0.0475864	0.12759	0.195769	0.269341	-0.229545	0.0811462	-0.0265403	-0.412623	-0.158317	-0.128222	-0.0780244	-0.37985	-0.138038	0.149478	-0.0158072	-0.684236	-0.0729094	-0.172869	0.0696044	-0.244714	-0.102052	0.157505	0.0377255	-0.177061	0.192023	0.157136	0.104181	0.285524	-0.14679	-0.253648	0.0367932	-0.204485	0.0898857	0.268557
PLIN2	-0.0220222	-0.0815601	0.234829	0.280015	0.325461	0.805509	0.658174	0.459653	-0.311726	0.721653	0.519536	0.664508	-0.448598	0.342981	0.163359	0.357646	0.97539	0.191756	0.812557	-0.48181	-0.582577	-0.729954	-0.269309	-0.24916	-0.45624	-0.223862	-0.0762119	-0.102796	-0.954149	0.0880795	-0.501852	-0.429555	-0.42238	-0.644773	-0.302108	0.386233	0.830064	0.655447	0.273125	0.304572	0.708649	0	-0.324779	-0.467477	-0.0703507	-0.630574	0.1125	-0.971839	-1.07561
ADH1A	0.105486	0	-0.18592	-0.0906935	0.195019	0.10739	0.409001	0.449283	0.2108	0.491308	0.348165	0.25944	0.0273466	-0.499086	-0.0822449	-0.111494	-0.101902	0.0201206	0.239759	-0.65181	-0.06248	-0.268908	-0.741772	-0.163014	-0.487499	-0.0297937	-0.262967	-0.0825214	-0.299458	-0.260594	-0.67846	-0.22758	0.0156975	-0.238273	-0.221926	0.236746	0.148887	0.153168	0.0543327	0.254361	0.187205	0.13102	0.377593	-0.124532	-0.250823	0.0105515	-0.108113	-0.286675	-0.192117
ADH1B	0.122384	0.196396	-0.169029	-0.0876331	0.195345	-0.00427055	0.232115	0.399701	0.132052	0.306472	0.431784	0.234052	0.0583086	-0.278443	-0.247856	-0.111332	-0.259657	-0.0611544	0.16403	-0.425358	-0.0747795	-0.240617	-0.74549	-0.214057	-0.193703	-0.0485039	-0.281671	-0.236487	-0.5621	-0.366069	-0.977033	-0.0705032	0.00244618	-0.168002	-0.113233	0.245131	0.239751	0.104486	0.0434313	0.136276	0.0678902	0.144541	0.260218	-0.0628481	-0.0570173	0.00758171	-0.123113	-0.110589	-0.292592
ADH1C	0.169687	-0.515615	-0.306055	-0.264615	0.19782	-0.160754	0.271688	0.42795	0.0764713	0.2113	0.277514	0.359963	0.0163383	-0.696831	-0.152256	-0.299033	-0.133939	0.107804	0.204828	-0.532768	-0.268717	-0.148483	-0.620659	-0.205207	-0.00465488	0	-0.350289	-0.0499382	-0.390128	-0.174204	-0.514026	-0.107611	0.0386972	-0.109062	0.224881	0.0936585	0.0363064	0.144402	0.0356388	0.0995226	0.106076	0.414957	0.537323	-0.0805197	-0.283902	-0.0244274	-0.214029	-0.242309	-0.0395575
ADH4	0.147894	-0.189425	-0.421674	-0.139889	0.387026	-0.0156002	0.147373	0.309309	0.126036	0.237703	0.308624	0.316497	0.122935	-0.212402	-0.245865	-0.0558186	-0.107248	0.0572624	0.368904	-0.209366	0.0668716	-0.177851	-0.662152	-0.0765705	0.0851746	-0.0604963	-0.246495	-0.288971	-0.750323	-0.303647	-0.977852	-0.10778	-0.0504427	-0.0983963	-0.246809	0.137923	0.186568	0.127243	0.0965509	0.0956059	0.104885	-0.0138054	0.282189	-0.081686	-0.26538	-0.00145817	0.0028038	-0.0589123	-0.405808
ADH5	0.162155	-0.23381	-0.322733	-0.0692415	0.613372	0.112705	0.36563	0.522945	0.389165	0.511992	0.635634	0.622056	0.16776	-0.219732	0.0466709	-0.0337162	-0.0796518	0.0942564	0.701845	-0.245064	-0.131281	-0.597033	-0.629182	-0.212998	0.0395918	-0.273891	-0.259166	-0.248024	-0.326958	-0.116783	-0.631441	-0.394113	-0.329506	-0.288073	-0.105267	-0.113133	0.454556	0.342529	0.435254	0.643629	0.810366	0.570693	0.276164	-0.0772324	0.0382137	-0.0733509	-0.0473032	-0.420138	-0.596533
ADH6	-0.0103884	-0.211067	-0.308521	-0.191996	0.516658	-0.00841236	0.398622	0.613147	0.324224	0.471951	0.505653	0.524823	0.301593	-0.223467	0.130684	0.0166674	0.260137	0.330266	0.398457	-0.311917	0.136868	-0.365849	-0.618428	-0.188457	-0.308887	0	-0.351863	-0.34166	-0.769059	-0.503162	-0.90546	-0.239994	-0.0164518	-0.433463	-0.507359	0.149388	0.497579	0.399066	0.337323	0.539285	0.236533	0.250993	0.312324	-0.0942659	-0.220863	-0.0561104	-0.191016	-0.199205	-0.208287
ADH7	-0.136193	0.0206103	0.115621	0.22443	0.0902371	-0.00152254	0.0403042	0.209782	0.263685	0.0754552	0.0428705	0.0735126	0.064714	-0.26824	0.129279	0.00878572	-0.0692711	0.514437	0.0440068	-0.117411	-0.0232	-0.0264449	0.0734692	-0.0870337	-0.0480819	-0.100931	0.0121269	-0.0321765	0.0280566	-0.133205	-0.212233	-0.0396981	-0.00620127	-0.0838313	0.0578923	0.0880518	0.064178	0.0537357	0.409959	0.274672	0.053678	0.105922	-0.13214	-0.181345	-0.155903	0.0953994	-0.178287	-0.0783844	-0.0839257
ADK	0.269837	-0.299301	-0.00593948	-0.0398216	0.496626	-0.0198784	0.307615	0.28055	-0.122546	0.405616	0.502959	0.336914	-0.127959	-0.461015	-0.357804	-0.313833	0.0818253	0.0888748	0.375581	-0.464375	-0.200323	-0.406	-0.973519	0.0319996	-0.177887	-0.410347	-0.403193	-0.360234	-0.591594	-0.217297	-0.862119	-0.687837	-0.0163803	0.0829582	0.0823393	0.099638	0.529001	0.297319	0.221839	0.434136	0.337651	0.31856	0.43504	-0.225146	-0.333327	-0.338648	0.161424	-0.310962	-0.775419
ADM	-0.242462	0.527895	0.724366	-0.0815916	-0.137631	-0.135328	0.800878	0.0744009	-0.116752	-0.0671492	-0.158903	-0.154023	-0.332934	0.636344	0.111357	-0.317118	-0.109411	0.332305	0.112225	-0.22787	-0.105476	-0.164043	-0.479107	-0.191564	-0.377948	-0.292458	-0.181466	-0.0894093	0.896333	-0.179868	0.186781	0.548798	-0.146755	0.25341	-0.375406	-0.0309372	0.72009	-0.0572166	-0.131241	0.656882	-0.0477934	0.437926	-0.0133858	-0.379777	0	0.600606	-0.0480413	-0.0349593	0.0680389
ADORA1	-0.164955	0.0152988	-0.172431	-0.123966	-0.0665164	0.662809	0.0180998	0.190552	0.0997667	-0.241882	0.157868	0.0651307	-0.200191	-0.0212865	-0.0370498	0.124842	0.0509553	-0.0230436	-0.00556326	0.107879	-0.236023	0.199471	0.315158	-0.0359592	-0.0581374	-0.138475	0.00543117	0.218808	0.249449	0.196653	0.19698	-0.178002	-0.0521483	-0.154199	0.0233059	-0.15595	0.0202575	0.0254259	0.0603495	0.068665	0.157391	0.118852	0.19722	-0.293127	-0.290507	-0.384866	0.0549417	0.0133543	0.149713
ADORA2B	-0.188787	0.168875	-0.150689	-0.0495529	0.0270047	0.120387	0.202424	0.104804	0.146498	-0.201429	-0.222022	-0.00310421	0.0355363	0.0839109	0.0570865	0.0306129	-0.0516582	0.041214	0.0217571	0.0399871	-0.0297103	0.0149803	0.399839	0.324003	0.0355191	-0.0794673	0.148393	0.124312	0.287272	0.0698037	0.134249	0.0994329	0.198595	0.100388	-0.0116768	-0.00187111	-0.0320001	-0.114586	-0.165161	-0.0235157	-0.223069	-0.0300255	-0.117689	-0.103639	-0.191858	-0.238683	-0.00504446	0.0789213	0.00934982
ADPRH	0.00640011	0.20555	0.148217	0.186529	-0.0839434	-0.0551457	0.135956	0.0501509	0.00544882	-0.0507517	-0.11513	-0.106652	0.0960436	0.0826349	-0.0958381	0.0545039	-0.11813	0.0222335	-0.0758376	0.0389204	-0.0705838	0.128836	0.240747	0.00839281	-0.0162134	-0.11133	-0.0219641	0	0.0931272	0.116158	0.223349	-0.0779982	-0.0700583	-0.0340753	-0.00260591	-0.0809126	0.0771322	-0.0186338	0.0787621	0.145355	-0.0127463	0.257996	-0.0758696	-0.0636916	-0.0894875	0.0515318	-0.00714397	0.0286975	0.22666
PARP1	0.083044	-0.264057	-0.190093	0.0561204	0.243693	-0.693232	-0.0384073	0.119886	-0.306124	0.248793	0.0998154	-0.0932746	-0.132705	-0.175176	-0.236793	-0.0523419	-0.0231471	0	0.307133	0.143878	-0.0137539	-0.197141	-0.122915	0.0178428	-0.167249	-0.054626	-0.0957909	-0.163673	-0.19101	-0.42775	-0.547925	-0.311527	-0.392495	0.00127173	-0.30974	0.133841	0.127362	0.00392675	-0.0165319	-0.00640774	-0.0175409	0.0246348	0.133983	-0.0583062	0.000316	0.000407	0.102441	-0.481317	-0.0319939
PARP4	-0.00634956	-0.0544796	-0.00797749	-0.546619	0.0920363	-0.0172052	0.37675	0.348978	0.174673	0.431805	0.0534821	0.371013	0.0127802	0.188873	-0.178201	-0.319903	-0.0271826	0.212033	0.110936	-0.142796	-0.140759	-0.329792	-0.657342	-0.339239	-0.227887	0.113719	-0.173475	-0.26163	-0.163691	-0.251905	-0.426076	-0.207529	-0.353741	-0.11821	-0.349387	-0.326073	0.357246	0.210057	0.244843	0.320479	0.351766	0.50487	0.224545	-0.0350666	-0.118325	-0.0404816	-0.137208	0.0434856	-0.258403
ADRA1D	-0.0328617	0.201813	-0.194545	-0.0559502	-0.150725	0.0291977	0.0440683	-0.0439801	-0.161445	-0.537018	-0.202804	-0.276696	0.0713701	0.271881	-0.157098	0.082397	-0.238924	0.151954	-0.103399	-0.363012	0.182213	-0.261219	0.173676	-0.063066	-0.20085	0.0253367	0.126435	0.0624437	0.107736	0.0108824	0.0508118	-0.148917	-0.259407	-0.131525	-0.12974	0.0934534	-0.130262	0.09056	-0.236216	0.0575762	0.0582051	-0.0288911	-0.342574	-0.230375	-0.0699506	0.00744629	-0.115201	-0.296421	0.0444694
ADRA1B	0.0104122	0.102399	0.175241	0.164254	-0.382622	0.104096	-0.19421	-0.120385	-0.290716	-0.0707893	0.0637202	-0.189982	-0.262095	-0.131856	-0.110633	0.0288672	0.219419	0.304725	-0.492068	-0.0470109	-0.406497	-0.122317	0.253064	-0.306398	-0.0778956	-0.0948138	0.0666657	-0.0490417	0.324972	-0.0789776	0.0807714	0.0686379	-0.0534515	0.218174	0.59614	-0.149802	-0.188272	-0.104013	-0.0285063	-0.340761	-0.0854888	-0.218976	-0.22366	0.0779543	0.113894	0.26065	0.0283017	0.0930939	-0.142974
ADRA1A	-0.261803	-0.495828	-0.139362	-0.108936	-0.155462	-0.200266	0.299668	-0.232078	0.175261	0.323422	0.194975	-0.182938	0.156087	0.377657	0.643555	-0.151038	0.0626669	0.0459204	-0.439317	-0.142877	0.23321	-0.514864	-0.0703001	-0.181674	0.184936	0.222607	0.384169	-0.296871	-0.34199	-0.349808	0	0.396037	0.190166	-0.613643	-0.416105	-0.21053	0.49437	0.138123	0.37035	0.337585	0.207912	0.185352	0.347526	0.490323	0.0915833	-0.0199585	-0.335175	0.0215006	-0.165409
ADRA2A	0.0859737	0.299413	-0.017169	-0.0887365	0.196714	0.337827	-0.106254	0.0952787	0.250111	-0.0484767	0.0553632	0.110476	-0.11207	0.388858	0.088438	-0.0968327	-0.0878315	-0.0253162	0.0110588	-0.13055	-0.305533	-0.246318	0.197759	-0.0599122	-0.0388484	-0.0941505	-0.0699449	-0.028398	-0.105546	0.00136805	0.0242643	0.181859	0.054863	0.151597	0.121335	-0.181406	-0.110362	0.00707531	0.00853682	-0.0411139	0.0323901	0.190621	0.0326347	-0.0455646	-0.265557	0.0775523	-0.151442	-0.114863	0.0872798
ADRA2B	0.115717	0.509974	-0.165091	0.154751	-0.36932	0.0987391	-0.398704	-0.0912504	-0.213576	-0.262971	-0.18702	-0.321506	0.0979896	0.0942164	0.123332	-0.0400066	0.416906	-0.0177631	-0.352086	0.325	0.0827179	-0.255469	0.130594	0	-0.0473967	0.125902	0.101875	0.0787368	0.4606	0.0649142	0.50034	0.105325	-0.0782342	-0.141828	0.298359	0.20224	-0.344348	-0.0193276	-0.112617	-0.0110168	-0.155509	-0.0919886	-0.255508	0.297669	0.0039196	0.299046	0.0202918	0.1274	0.113085
ADRA2C	0.0195613	0.259472	0.0791788	0.0478253	-0.111379	0.120874	-0.0398903	0.044807	0.423253	-0.237939	-0.16453	-0.175449	-0.356921	-0.0781226	0.279471	-0.130056	0.0190525	-0.206167	0.0910425	0.0340438	-0.127789	0.00163269	0.368367	-0.0797882	-0.171078	-0.171643	0.0307121	0.0349712	-0.460543	0.0572224	0.431243	0.105984	0.167038	0.210496	0.034616	0.197065	-0.0305667	-0.00304461	0.120543	-0.0198011	-0.139467	0.0309229	0.0766625	0.115256	-0.213804	-0.0282035	-0.233048	-0.402695	0.331914
ADRB1	-0.0768371	0.120419	-0.0826864	0.0476508	-0.207973	0.606432	0.214449	0.0985751	0.26148	-0.0996585	-0.091507	-0.131006	0.0116777	0.490654	0.158741	0.197704	0.203773	0.20172	-0.0770669	-0.0732226	-0.248688	0.0064764	0.145387	-0.13147	0.0606499	0.0619426	0.192017	0.0498371	0.0830479	0.0331025	0.243813	-0.0630145	0.0864158	0.126585	-0.0411267	-0.00395918	0.0909848	-0.120943	0.0761948	0.113572	-0.064744	0.185737	0.00663853	-0.0316124	-0.125664	-0.121496	-0.109871	-0.0644956	0.122817
ADRB2	0.104817	0.0112352	-0.100557	0.0475168	-0.124218	0.376281	-0.250683	-0.0895968	0.104642	-0.12638	-0.124462	0.0217724	0.45157	0.429005	0.348437	0.211036	0.461876	0.300237	-0.323254	-0.11236	0.0888491	0.249552	0.405123	-0.158556	-0.00904751	-0.127879	0.107153	0.262173	-0.0305014	-0.0235414	0.306944	-0.0813999	0.00560141	-0.135436	-0.0863991	0.122261	-0.00625658	0.0416961	0.213311	-0.131711	0.0775723	-0.159863	-0.107739	0.12089	0.0346146	0.0635781	0.229344	0.25119	0.0924835
ADRB3	-0.158478	0.299491	0.0529132	-0.130882	0.045475	0.346351	0.109721	-0.0624557	-0.139533	-0.0678239	-0.115276	0.0367351	-0.165293	-0.00675726	0.0548997	0.32346	-0.123854	0.0810795	-0.0773268	-0.0305414	-0.125487	0.0880685	0.184543	0.0425391	-0.112156	0.115265	0.295012	0.074152	-0.0120854	0.229867	0.125612	-0.161197	0.0564928	0.163101	-0.0234165	0.00239181	0.134559	0.052444	0.0964956	0.208382	-0.125798	0.0765786	-0.16116	-0.245702	-0.192276	-0.173726	-0.143486	-0.235605	0.0132051
GRK2	0.275269	0.150351	0.369165	0.159906	-0.207575	-0.198143	-0.399348	-0.292085	-0.184218	-0.244098	-0.28933	-0.412591	0.359341	-0.00480223	0.251729	0.38034	0.263101	-0.120278	-0.158108	0.00666189	0.27951	-0.0320892	0.0209179	-0.0327702	0.0570316	0.245906	0.160283	0.100214	0.036067	-0.0117979	0.0567613	0.256294	0.135801	0.149607	0.152853	0.240099	-0.292288	-0.327016	-0.139997	-0.240062	-0.363565	-0.234745	-0.366452	0.0135517	0.165703	0.102443	-0.172933	0.0741444	0.252035
GRK3	-0.103384	-0.105355	0.363468	-0.0154805	-0.130062	-0.0137076	0.22584	0.10688	0.139329	0.332077	0.0237398	0.0474701	-0.249376	-0.0167332	-0.372772	-0.0752058	0.0470896	-0.255522	0.0320134	0.0343623	0.0923767	-0.151348	-0.410642	-0.049943	-0.237751	-0.0837288	0.03054	-0.0452337	-0.247939	-0.100173	-0.553431	0.238853	-0.0281425	-0.212658	-0.222275	0.0832686	-3.15e-05	0.00309515	-0.172612	0.0762563	0.0191293	0.195594	-0.0119953	-0.0991907	0.0121193	0.129261	0.0700421	-0.213949	0.0194817
ADSL	0.185233	0.13193	-0.0328612	0.0552888	0.255624	-0.0428553	-0.0389285	0.127096	-0.164694	-0.0276475	0.0832586	0.0985971	-0.174129	-0.0833688	-0.0923004	-0.293243	-0.091022	-0.214249	0.158449	-0.162524	0.0520201	-0.150184	-0.795119	0.0590692	-0.13028	-0.0580034	-0.0040431	-0.0311046	-0.192579	-0.100316	-0.632265	-0.161706	-0.311106	-0.161651	-0.208391	0.0816641	0.201025	0.203023	-0.0655875	0.201303	0.0457778	0.0125432	0.0924449	0.0779028	0.0265369	0.0114155	-0.171294	-0.329782	-0.10874
ADSS	0.0253148	-0.133255	-0.322351	0.0426888	0.196375	0.0549278	-0.047164	0.0864377	-0.0738068	0.299243	0.0122809	0.126092	0.106611	-0.101131	-0.0777979	0.0298619	-0.0764146	-0.016367	0.171148	-0.0562243	-0.0451164	-0.0707455	-0.523239	0.0471659	-0.0807724	-0.152138	-0.230247	-0.134951	-0.696436	-0.297925	-0.573946	-0.340961	-0.126541	-0.472312	-0.189065	-0.113655	-0.0750084	0.199477	-0.094141	0.010427	-0.0540552	0.121783	0.297893	-0.0755258	0.0535445	0.264595	-0.0142689	0.0671034	-0.28203
AP2A1	0.400987	0.102067	0.312171	0.108501	-0.322156	-0.340541	-0.322745	-0.214623	-0.357276	-0.289455	-0.228094	-0.35934	0.225117	0.286945	0.533446	0.388592	0.60086	0.42031	-0.0898395	-0.12674	0.332371	-0.239462	-0.528006	0.160338	0.0221396	0.461599	0.266238	0.207658	0.0813961	0.0357194	-0.0640087	0.303285	-0.153711	-0.0854011	0.20846	-0.0834055	-0.527073	-0.209267	-0.196986	-0.190224	-0.119813	-0.292457	-0.228304	-0.196763	0.136199	0.160445	0.0725822	0.0284224	0.226575
AP2A2	0.248625	0.0823674	-0.116096	0.00728178	0.0143647	-0.107893	0.00479984	-0.0676684	-0.234635	-0.100242	-0.293924	0.0998015	0.21251	0.29217	0.0907044	0.145327	0.329697	0.221313	-0.0537148	0.0225945	0.129634	-0.0789123	-0.32082	0.0955319	-0.105509	0.227437	-0.0199733	0.0244002	-0.0853729	0.0305467	-0.174706	0.16109	0.110373	0.217416	0.0996757	-0.08078	-0.334341	0	-0.053494	-0.0276556	-0.0557547	-0.137681	-0.0921021	0.054246	0.176172	0.0538912	0.0175052	0.0390215	0.324513
AP1B1	0.0149536	0.0446405	-0.129564	-0.158812	0.100898	-0.129601	0.140934	0.075129	-0.248906	-0.0617251	-0.0971222	0.0609832	0.0283532	-0.0492826	0.296298	0.351492	0.297977	0.289564	-0.1947	-0.19951	0.0942602	-0.419159	-0.0229254	0.0140247	-0.33599	0.299862	-0.120998	0.168893	0.101557	-0.303675	-0.267912	-0.0536695	-0.376329	0.135092	-0.0506697	0.102013	-0.00404549	0.0609412	-0.123363	-0.013844	0.122531	-0.246659	-0.0129914	-0.0668573	-0.0181284	0.134364	-0.184515	-0.0789528	0.114663
AP2B1	-0.0530491	0.103274	-0.0306673	-0.183398	0.114912	0.0584688	0.214779	0.289677	0.167218	0.295916	0.157082	0.0307407	0.140943	0.0510054	0	-0.0280008	-0.272731	-0.112417	0.270048	-0.223992	0.135991	-0.224281	-0.650153	-0.176365	-0.33394	-0.112333	-0.080863	-0.199657	-0.432457	-0.198466	-0.660643	-0.0793085	-0.275669	-0.0878334	-0.231609	-0.0724478	0.0442028	0.114841	0.110207	0.225445	0.18047	0.0401897	0.303819	-0.134679	-0.128889	0.165377	-0.281902	-0.178674	-0.323575
AP1G1	0.0469437	-0.407418	-0.00527382	-0.131566	0.219099	-0.136759	0.283591	0.167236	-0.19536	0.336273	0.107924	0.144254	0.15945	0.131677	0.128051	0.193065	0.130132	0.133076	0.219871	-0.193609	0.111825	-0.377001	-0.624841	-0.274813	-0.219722	-0.123528	-0.188851	-0.331824	-0.430702	-0.317043	-0.693755	-0.0325565	-0.13801	-0.115476	-0.28089	-0.106702	0.118492	0.18712	0.135128	0.145961	0.152842	0.0192938	0.0279236	-0.165672	0.0419836	-0.0457277	-0.24686	-0.343263	-0.334297
AEBP1	-0.0500021	0.270903	-0.259771	0.112263	-0.503801	-0.389049	-0.293849	-0.242181	0.053483	-0.142409	-0.125161	-0.525868	0.0825391	0.360959	0.103024	-0.217014	0.161106	0.0589314	-0.347703	0.548499	0.385157	-0.350986	0.0901203	0.0609589	0.165006	0.35862	-0.0462408	0.281651	0.54357	0.458591	0.0485034	0.22853	0.0569434	-0.480524	0.173475	0.0303764	-0.460785	-0.0852127	-0.394659	-0.133294	-0.379758	-0.269356	-0.262644	0.0441642	-0.113244	0.12287	-0.331177	0.117059	0.586547
AES	0.0701704	0.161119	0.0976543	0.402769	-0.188955	0.0997171	-0.0623684	-0.261022	-0.200774	-0.442084	-0.327992	-0.299598	0.334175	0.421659	0.37331	0.37136	0.364397	0.45363	-0.259908	0.0997009	0.320957	-0.148373	-0.319983	0.1069	-0.0821857	0.078393	0.269823	0.243416	0.0231018	-0.0874815	-0.338077	0.260424	0.116531	0.0809231	0.103497	0.0640631	-0.331166	-0.285034	-0.266877	-0.165442	-0.164667	-0.258372	-0.217629	0.113686	0.0545635	0.153566	0.304606	-0.0996704	0.118509
CRISP1	-0.0173078	0.0810108	-0.0964809	-0.153152	-0.122828	-0.0468245	0.134338	-0.0791812	-0.0430579	-0.0325241	-0.112715	-0.0213957	0.0534806	0.0759759	0.0535526	0.0210495	0.0244756	0.0760341	-0.0798945	-0.0610175	0.071547	0.0286188	0.220603	0.14691	0.0756946	0.154266	-0.0438509	0.251497	0.105062	0.196079	0.0972805	0.139771	-0.0372095	0.0449595	0.0304008	0.0873346	-0.0505343	0.0320134	-0.059124	0.0402775	0.0323772	-0.0629683	-0.05826	0.0591211	-0.0697222	0.0349135	-0.122591	-0.0266066	-0.0778427
AFG3L1P	-0.0658369	0.0315385	-0.103246	-0.0287366	-0.0712624	-0.123883	0.05199	-0.155568	-0.14659	-0.0947857	-0.134447	-0.0135789	-0.141946	-0.0678716	0.22092	-0.0417247	-0.0411682	-0.105777	-0.0679803	0.0674596	-0.0298114	0.169456	0.342999	0.0534606	-0.00612354	0.219407	0.0463862	-0.0316014	0.072742	0.274036	0.27198	0.0766034	0.106965	0.0241899	0.0762572	0.0165195	-0.0424824	0	0.0581241	-0.0929847	-0.0904384	0.00286198	0.0549006	0.180515	-0.00467348	-0.0330191	0.0977602	0.144524	0.06635
AFM	0.184623	-0.104348	-0.386818	0.0217037	0.694654	0.312327	0.531409	0.717209	0.278031	0.698449	0.721115	0.951375	0.17933	-0.0708342	-0.14665	-0.0864639	-0.0410423	-0.0173569	0.65282	-0.0891342	-0.0387516	0.0350761	-0.454509	-0.406405	0.0137596	-0.23434	-0.180809	-0.416121	-0.688783	-0.487112	-0.693671	-0.367433	-0.00671196	-0.249016	-0.212431	0.116955	0.643047	0.552352	0.332661	0.568206	0.484644	0.443082	0.455858	-0.0122824	-0.223192	-0.167585	-0.222846	-0.274624	-0.552213
AFP	-0.0352488	0.0579739	0.233793	-0.0278249	-0.265245	-0.0229154	0.173458	-0.0971909	-0.143257	-0.227819	0.220595	0.0168214	0.0800266	0.0146871	-0.165061	-0.053349	0.310682	0.00129175	0.307827	0.00182819	0.243196	-0.145768	-0.0985398	0.324233	0.16124	0.246635	-0.227092	0.208608	-0.00685358	0.000826	-0.0661373	0.49492	0.105742	0.0638056	0.0755634	0.133399	0.682762	-0.263401	-0.00574875	-0.14655	-0.275391	0.763347	0.552327	-0.282061	-0.210502	0.305815	-0.119389	-0.108121	-0.247975
AGA	0.222404	-0.0276189	0.277262	0.339675	0.314545	-0.0930557	0.223334	0.583375	0.0754242	0.770023	0.45457	0.356184	-0.0916681	-0.296722	-0.427944	-0.600176	-0.280319	-0.290423	0.426138	-0.26854	-0.165903	-0.477086	-0.489553	-0.0591779	-0.251762	-0.147558	-0.32381	-0.331364	-0.608931	-0.0778537	-0.960693	-0.545567	0.0411458	-0.22302	-0.00291348	-0.0543847	0.473762	0.0900483	0.237038	0.295585	0.526222	-0.0358	0.378903	-0.0233164	-0.045774	-0.0825095	0.0352669	-0.507578	-0.378466
ACAN	0.0412922	-0.0372133	-0.0169501	-0.0369196	0.141365	0.378174	0.0542417	0.147796	-0.0266194	-0.133689	-0.0571003	0.118079	0.044466	0.157644	0.071003	0.0330839	-0.0122685	-0.0645266	0.0466919	-0.0330939	-0.136591	-0.0125747	0.0456572	-0.32994	0.0109816	-0.0677323	-0.152788	0.0219116	0.0211406	-0.162294	-0.140095	0.00997973	-0.245817	0.0203199	0.0271869	-0.184662	0.00494146	-0.0177088	-0.335573	0.0385985	0.102419	-0.205272	-0.131762	-0.0735741	-0.0855112	-0.313385	0.0296426	0.0012207	0.0991383
AGER	0.262375	0.189924	0.325996	0.121911	-0.410295	0.00383186	-0.346047	-0.319436	0.0612221	-0.241486	0.0100679	0.0489554	-0.198078	-0.240937	0.0501661	-0.106691	0.379193	-0.362357	-0.199181	0.102436	0.0389218	0.118835	0.416565	-0.00559807	0.304489	0.361177	0.0330706	0.440043	0.390051	0.0979857	0.749762	-0.0798278	0.455892	0.313615	-0.00122976	0.0554614	-0.16647	0.0637755	0.0234675	-0.0713119	0.0698628	-0.0425601	-0.216607	-0.0235167	0.0231795	0.0244994	-0.0209994	0.428219	0.427499
AGL	0.150146	-0.0485725	-0.143369	-0.425234	0.0953093	0.0980454	0.304998	0.121158	0.0630321	0.206753	0.457041	-0.00444412	0.306092	0.271483	-0.0976	-0.409949	-0.179111	0.345776	0.0449152	-0.389443	0.0874577	-0.423423	-0.812079	-0.338751	-0.10743	-0.389972	-0.251273	-0.598036	-0.0674953	-0.519711	-1.09711	-0.17697	-0.0148211	-0.513674	-0.232526	0.0262604	0.799972	0.0781565	0.00621414	0.202188	0	0.389078	0.203396	0.0034399	0.0131788	0.284428	-0.195045	-0.212946	-0.899602
AGRP	-0.110299	-0.0160694	0.0507274	0.000672	-0.0215445	0.0218487	-0.342814	-0.117471	0.155802	-0.0772004	-0.111532	-0.159596	-0.246085	-0.086144	0.0493412	0.251232	0.113539	0.00533915	-0.328711	0.213121	-0.0559878	0.121284	0.340895	0.115728	0.0358248	0.0259943	0.0907874	0.125929	0.194084	0.225967	0.371497	0.146372	0.0891757	-0.416847	0.0735426	0.331306	-0.246698	-0.234451	-0.164477	-0.149348	-0.149703	-0.129011	0.0121074	-0.142329	-0.0926504	-0.0164809	-0.0842276	0.201474	0.325699
JAG1	-0.442843	-0.0853591	0.188743	-0.0364847	-0.164282	-0.148325	0.12045	-0.143316	-0.0288754	0.0425091	-0.0606914	-0.10937	0.54316	0.78735	0.338377	0.631567	0.297304	0.0687613	-0.148188	0.764564	0.0805869	-0.00078	0.445528	-0.232122	0.71274	-0.201159	-0.0294814	0.812455	0.517302	0.262623	0.128539	0.2363	-0.345036	-0.19402	-0.181456	-0.435901	-0.13212	-0.157417	-0.0585031	-0.30042	0.182751	0.117219	0.366589	0.0585399	-0.0469337	0.504613	-0.134938	0.219349	0.453809
AGT	0.208076	0.375359	-0.147703	0.0957146	0.170671	0.495195	-0.0146685	0.112639	0.205151	0.00768757	-0.0579882	-0.160526	-0.330745	-0.0747547	-0.104563	-0.22291	0.265284	0.0510712	0.00396824	-0.428134	-0.102182	-0.855661	-0.37823	0	0.132086	-0.172204	-0.210279	-0.149746	-0.225647	-0.151083	-0.642846	-0.223695	-0.210153	-0.0625076	0.130942	0.442323	0.347219	0.245587	0.0871639	-0.0932674	0.237027	0.201596	0.0645075	0.103509	-0.138446	-0.106606	-0.276829	-0.520022	-0.402078
AGTR1	-0.468015	0.143275	0.205892	-0.418157	0.357373	0.0475397	0.106013	-0.0466385	0.270213	0.536226	0.319338	-0.0604591	0.123814	0.645882	-0.0952368	-0.560612	0.0972319	0.354302	-0.0545006	-0.215828	0.00270462	-0.722624	-0.711969	-0.417485	-0.0731163	-0.416494	-0.267461	-0.537639	-0.0875435	-0.666058	-0.462081	-0.276139	-0.113365	-0.816706	-0.468697	-0.233649	-0.0215559	0.275183	0.360134	0.154086	0.165098	0.156508	-0.0889187	0.116484	0.142857	0.380565	-0.300049	-0.425236	-0.606204
AGTR2	-0.0116487	0.246454	0.0763655	-0.00215292	-0.159606	0.000654	-0.0287189	-0.0603271	0.0298662	-0.0570211	-0.0401196	-0.0789204	0.09518	0.129101	0.245736	0.0299826	0.0611563	0.102156	0.0261931	-0.013001	-0.0458198	0.140029	0.20987	0.0724645	-0.0270233	0.0613475	0.00167322	0.131395	0.0732188	0.151368	0.447317	-0.0296469	0.0822892	-0.0262284	0.14487	0.129582	-0.072288	0.0251989	0.0499611	-0.16608	-0.0146165	-0.00429153	0.125696	0.0282836	0.101639	-0.0471268	0.101436	0.0632715	-0.0236664
APLNR	-0.0185885	0.155963	0.0708709	-0.0884018	0.0224547	-0.0616884	0	-0.0137701	0.692981	0.428697	-0.17959	0.0550685	0.0207009	-0.0547447	0.364135	0.45806	0.852042	-0.0474882	-0.155325	-0.0880537	0.139113	-0.0106063	-0.29811	0.0769582	-0.0346642	0.323488	0.25934	0.418152	0.335886	0.195138	-0.23489	0.048708	-0.100845	0.137148	-0.155619	0.134249	-0.0541563	0.537813	0.103431	0.184493	0.450943	-0.537124	0.17592	0.00470543	-0.323787	0.611185	-0.279643	0.0991826	0.513082
AGXT	0.402053	0.504508	0.26409	0.357733	-0.127306	0.0908136	0.0155725	-0.195186	-0.0111427	-0.181991	-0.639567	-0.323244	0.0957594	0	0.310557	0.420631	0.277023	0.241645	-0.345058	0.114939	0.803517	-0.361174	-0.44187	0.380518	-0.0208464	0.604371	0.279154	0.343202	0.278674	0.0361633	-0.0896225	0.274528	-0.109307	0.127919	0.0790844	0.276377	-0.113835	-0.109855	-0.275158	-0.127296	-0.0745783	-0.52061	-0.405349	0.119534	-0.273531	0.187283	0.126855	-0.439767	0.254124
NR0B1	0.0982118	-0.0645247	0.215333	0	-0.0690117	0.366755	0.0227861	-0.087532	-0.182278	-0.0287604	0.0753384	-0.0819211	-0.182991	-0.264336	-0.113351	0.0232406	-0.0886383	-0.231203	0.0662236	-0.0064168	-0.092524	0.155719	0.383253	0.140547	0.214059	0.108285	-0.0449214	-0.185854	0.0615277	0.10331	0.322582	-0.247018	0.148509	-0.0365663	0.0327101	0.0569968	-0.252901	-0.0422859	0.0436173	-0.0979219	-0.19735	0.0740986	0.162347	-0.0484562	0.00199318	0.00270891	-0.138743	-0.0389195	0.022758
AHCY	0.172039	0.307879	0.459533	0.113003	-0.236879	0.284451	-0.251425	-0.385462	-0.307707	-0.370501	-0.538827	-0.508175	0.0120897	0.241598	0.313839	0.191979	0.0713243	0.319519	-0.326844	-0.243899	0.277512	-0.385965	-0.223558	0.116238	-0.24417	0.685631	0.405357	0.352808	0.680984	0.075264	-0.0942135	0.133072	-0.0662613	0.264514	0.665968	0.100223	-0.312519	-0.133033	-0.0405798	-0.376439	-0.207217	-0.358059	-0.352274	0.205945	-0.326378	0.573744	-0.108347	-0.230404	0.219989
AHR	-0.153007	-0.301107	-0.0512419	-0.446506	0.343062	0.164812	-0.14899	0.399853	0.311109	0.917594	0.661348	0.440269	0.317035	0.0281363	0.396877	-0.0777416	0.233815	0.0115633	0.107085	-0.568211	-0.341948	-0.193367	-0.326105	-0.301224	0.323234	-0.451075	-0.59134	0.0755959	-0.523587	-0.21377	-0.303776	-0.117574	-0.202209	-0.0957518	0.257442	-0.0341167	0.0527382	0.469539	1.04412	-0.270087	0.233792	0.107486	0.405657	0.154659	-0.240379	0.543184	-0.297194	0.0861206	-0.473025
AHSG	0.285873	0.240891	-0.101028	0.178234	0.0511942	0.110379	-0.21774	-0.0462627	-0.114673	-0.212276	0.0999556	0.023941	-0.148759	-0.214614	-0.156715	-0.1689	-0.0668983	-0.0872221	0.130381	-0.157092	0.079504	-0.193325	-0.481389	-0.0678291	0.0160494	0.0548992	0.0272017	-0.0899897	-0.396402	-0.274084	-1.17785	0.122139	-0.223083	0.0646582	-0.257787	0.243615	0.019412	0.0411491	-0.137965	-0.0749197	-0.203286	-0.245495	0.0229721	0	-0.15651	0.069603	-0.166771	-0.324758	0.0201836
AIF1	0.0254369	-0.110743	0.128584	0.250646	0.091929	-0.32215	-0.0202622	0.00553369	0.0517511	0.307585	-0.102274	0.126385	-0.24934	-0.0897861	-0.430943	0.0681305	-0.0101051	-0.40765	0.489675	-0.204812	0.189445	0.5145	-0.0929828	0.194607	-0.364233	-0.303838	-0.204829	-0.300424	-0.302157	-0.388369	-0.535997	0.168134	0.277564	0.152797	0.131846	0.101957	0.217263	-0.0601196	0	0.113183	-0.198967	0.276056	-0.150567	-0.21383	0.249311	0.262175	0.457139	-0.134023	-0.00175619
AIM1	0.106682	0.10767	-0.334089	-0.304752	0.420993	-0.211367	0.206959	0.192285	0.132857	0.136327	0.199477	0.134552	0.435287	0.223245	-0.146995	-0.255953	0.150777	0.0598145	0.342875	0	0.300203	-0.181907	-0.714823	0.124381	-0.0181427	0.256417	-0.00206852	-0.261143	-0.179487	0.0188775	-0.266078	-0.407705	-0.0954294	0.0607142	-0.463047	-0.108409	-0.0663481	0.243972	0.0101547	0.125252	0.0227375	0.241134	-0.130319	-0.170771	-0.12079	0.0823751	-0.285299	-0.01442	-0.135557
AK1	0.191218	0.15181	0.0787172	-0.0593481	-0.144714	-0.27325	-0.0596662	-0.0277243	-0.332162	-0.143126	-0.267575	-0.2658	0.0810547	0.285896	0.179162	0.228229	0.142002	0.331415	0.104373	-0.0158563	0.193648	-0.0244389	-0.0600095	0.294804	0.0327764	0.122044	0.134985	0.206387	0.275054	0.0210857	0.317129	0.167851	-0.0520749	0.396217	0.11053	0.257544	-0.32327	0.0281253	-0.193745	-0.0282464	-0.171737	-0.234277	-0.310216	0.150253	0.0123773	0.106097	0.0885196	-0.0414782	0.186393
AK2	0.0325828	-0.253907	-0.357176	-0.0956087	0.0394497	0.0120854	-0.222473	0.0559416	-0.169162	0.0699019	0.112156	-0.0325236	0	-0.089602	0.0834127	0.0471697	0.058888	-0.0998659	0.192531	0.0334539	0.00537872	-0.316401	-0.0152273	0.0248594	0.0132732	0.104505	-0.0977688	-0.00999022	-0.254137	-0.290785	-0.45463	-0.467863	-0.0695005	-0.40451	-0.0942125	-0.124092	0.168196	-0.0873604	-0.121566	-0.147236	-0.11366	-0.201839	-0.052927	0.0121102	0.309453	-0.0276289	0.19675	-0.176585	0.0741115
AK4	0.331888	0.290236	-0.18296	0.170838	-0.0887427	0.336882	-0.0845914	-0.0894361	-0.160613	-0.082478	0.0960851	-0.237235	0.0914879	-0.0926857	-0.138868	-0.103644	0.0497632	0.174273	0.256603	-0.0709782	0.0878925	-0.21494	-0.128621	0.0303664	-0.168311	0.145556	0.109073	0.256788	-0.291791	0.0986395	0.094593	-0.0855913	0.120443	0.206869	0.249437	0.184622	0.225988	0.104678	0.205703	0.103551	0.0108676	-0.120868	0.0527091	0.14013	-0.0978413	-0.0645509	-0.247064	-0.153903	-0.120065
AKT1	0.145505	-0.0846615	0.164209	0.192099	-0.261542	-0.331465	-0.403155	-0.427626	-0.481739	-0.664325	-0.385696	-0.4325	0.194529	0.15563	0.149067	0.370239	0.20752	0.155466	-0.421604	0.169642	0.251909	-0.145956	-0.0559168	0.242865	0.0395365	0.271894	0.262371	0.272665	0.270168	0.0550489	-0.0468693	0.1663	0.0867567	0.210563	-0.0703507	0.321939	-0.542148	-0.389812	-0.562149	-0.497193	-0.370462	-0.512779	-0.378562	0.0941362	0.261086	-0.00113773	0	0.0471239	0.365735
AKT2	0.0631762	-0.0409203	0.103522	0.12926	-0.127988	-0.0800514	-0.0613356	-0.455603	-0.389442	-0.361954	-0.462351	-0.319231	0.408584	0.291934	0.537893	0.464384	0.201159	0.174386	-0.162096	-0.0166883	0.24465	-0.208976	0.00844192	0.194925	0.0765648	0.44069	0.114469	0.0608568	-0.0211067	-0.0273418	-0.0703535	-0.119645	-0.185474	-0.0108795	0	0.0845966	-0.211836	0.0341368	-0.137766	-0.0600147	-0.12254	-0.387937	-0.39186	0.0532103	0.113504	0.21701	0.0332136	0.0456934	0.25553
ALAD	0.139996	0.0512476	-0.319046	-0.0742588	0.0721846	-0.115448	0.1748	-0.126964	-0.143073	-0.0212498	-0.026432	-0.116995	-0.0530481	-0.155237	0.166184	0.0124445	-0.0498791	0.202023	0.0145855	-0.09478	0.380099	-0.421143	-0.444645	0.33315	-0.0248919	0.532848	0.0411768	0.0977488	-0.10052	0.108883	-0.236778	0.159766	-0.411614	-0.164052	0.132998	0.14354	0.278887	0.0596132	0.224648	0.0268297	0.171208	-0.0104389	-0.048955	0.396633	-0.0526123	0.134854	-0.244812	-0.0614243	0.272268
ALAS1	-0.306922	-1.08547	-0.465859	-0.162901	0.0582685	0.552835	0.253967	-0.112027	-0.0807648	0.042593	-0.101016	-0.717727	0.193583	0.399388	0.640365	-0.0846996	-0.000855	0.460497	0.0289021	-0.670008	0.950475	-0.433456	-0.842212	-0.844216	-0.620582	-0.090272	0.362168	-0.3952	-0.782682	-0.216151	-0.117854	0.217237	-0.0849199	-0.764533	-1.41238	-0.0717516	0.656039	-0.0575094	0.161588	0.048584	0.0234928	-0.0497684	-0.328405	0.441909	0.625698	0.127773	-0.37599	0.174895	-0.490229
ALAS2	0.0311956	-0.224518	-0.153325	-0.0400152	0.1853	0.385066	0.0589333	0.253362	0.250169	0.121725	-0.0609331	-0.0611224	-0.0675883	0.0870666	0.0755281	0.0179257	0.142884	0.0421572	0	-0.167212	-0.183756	-0.102226	-0.319671	-0.0201378	-0.0862665	-0.0373898	0.138379	0.0968537	0.0723214	0.227506	-0.0182223	-0.044703	-0.15767	-0.0790701	-0.0508943	-0.144245	0.350149	0.0898647	0.0143723	0.14304	-0.00119066	0.336127	0.304388	-0.128637	-0.137677	-0.44946	0.0059514	-0.0260348	-0.101638
ALB	0.0594893	-0.158875	0.094347	0.0521164	0.107594	-0.197319	-0.104548	0.114461	-0.027545	0.0548925	0.108355	0.0656586	-0.147567	-0.218624	-0.298357	-0.151967	-0.15229	-0.16297	0.136463	-0.0810175	-0.08076	0.0302925	-0.0947475	-0.0365515	-0.0207615	-0.0332727	-0.0827827	-0.160302	-0.247877	-0.225129	-0.400085	0.0358791	0.106263	-0.1019	0.0339813	0.0995378	0.0608873	-0.0700493	-0.10643	-0.128503	-0.118423	-0.026557	0.0318041	-0.041419	-0.0683584	0.0174751	-0.0228205	-0.127087	0.0406055
ALCAM	-0.108803	-0.407034	-0.0990133	-0.103767	0.29363	-0.294051	0.180165	0.165879	-0.170481	0.449308	0.346379	0.272607	0.105223	-0.0462027	-0.143446	-0.116987	-0.128848	0.327243	0.183397	-0.0465994	-0.210051	-0.144543	-0.38686	0	-0.223923	-0.1827	-0.259421	-0.405358	-0.0225058	-0.196203	-0.559118	-0.45065	-0.294018	-0.114569	-0.389389	0.0847454	0.0750141	0.0278845	-0.240851	0.089427	-0.208666	-0.00724983	0.398666	-0.274594	-0.229653	-0.0459976	-0.0255442	-0.455346	-0.41633
ABCD1	0.0750351	0.255538	0.0266399	0.0871763	-0.394067	0.0627055	-0.100246	-0.372937	-0.152985	-0.61757	-0.278617	-0.438974	0.220885	0.0182529	0.288356	0.12035	0.244701	0.0588126	-0.342992	0.118691	0.00105429	0.0328126	0.179391	0.121659	-0.0988331	0.106381	0.228456	0.421515	0.26374	0.163127	0.202489	0.13464	0.00777674	0.0799785	0.274693	0.0030427	-0.357406	-0.368772	-0.23594	-0.409194	-0.3644	-0.27018	-0.208995	0.181787	0.0261688	0.129363	-0.165242	-0.0434003	0.148812
ALDH1A1	0.336372	-0.0850801	-0.650649	-0.426205	0.382517	0.499648	0.639434	0.313331	0.178642	0.54462	0.381834	0.301102	0.132074	-0.352598	-0.249267	-0.420112	-0.355883	0.0451612	0.25778	-0.622182	0.042243	-0.573046	-0.769295	-0.195991	-0.203315	-0.322693	-0.397482	-0.444494	-0.410404	-0.590694	-0.836254	-0.287098	-0.172873	-0.161857	0.00918007	-0.00563526	0.498738	0.26545	0.283514	0.286421	0.305642	0.0764275	0.548878	0.0158062	-0.360463	0.123217	-0.346582	-0.326729	-0.628599
ALDH2	0.186061	0.261638	-0.0270014	0.29886	-0.0079031	0	-0.109195	-0.0952511	-0.197871	0.0859203	-0.0839996	-0.0399828	0.0350342	-0.133158	0.0636263	0.100058	-0.0570316	0.0450411	-0.00416946	-0.0887012	0.26344	-0.346197	-0.423356	0.0489635	0.226161	0.296019	0.0165205	0.0175819	0.0351171	-0.206175	-0.395511	0.0926819	-0.13757	0.141019	-0.0124674	0.105151	0.0483084	-0.00474739	0.0679922	0.00137234	0.0180483	-0.074583	-0.0195847	0.159648	0.106077	0.180777	0.0602198	-0.326529	-0.0214472
ALDH3A1	0.185924	0.153619	-0.0623307	0.00425148	-0.00509834	0.327457	-0.0148296	0.0840678	0.0973272	-0.23418	-0.0624633	-0.0452356	-0.116552	-0.109422	0.0930438	-0.0823612	-0.0984345	-0.0106959	-0.101716	0.0305729	-0.121237	0.0239205	0.000205	0.0242548	0.0204163	-0.108193	0.165513	0.0156994	0.248289	0.123954	0.175913	-0.0937958	0.22769	0.208812	0.100916	-0.0313835	-0.0646949	0.076282	0.243677	-0.0427141	0.137011	-0.0255947	0.00983715	0.0551801	-0.163055	-0.139215	-0.103861	0.0672603	-0.0489688
ALDH1B1	0.335721	0.174937	-1.03029	-0.0788269	0.445407	0.231626	0.0488462	0.407689	-0.268636	-0.603867	0.282854	-0.0424871	0.63606	-0.204793	0.165665	0.490438	0.131577	0.620548	-0.0460329	0.004673	0.00444126	-0.116864	-0.0570555	-0.3727	0.219235	-0.149663	0.19747	-0.158367	-0.356051	-0.228594	-0.601319	-0.338556	0.396034	0.368118	0.455889	0.623171	0.0279951	0.0531836	-0.0761042	-0.120052	0.211502	-0.503889	0.183888	0.231135	0.0463753	-0.160022	-0.692746	0.293863	-0.143548
ALDH1A3	0.126535	0.0634584	0.0553203	-0.150707	0.108333	0.321779	0.125277	0.0491018	-0.0634112	-0.356028	-0.186996	-0.036612	-0.211308	-0.30551	0.0318222	-0.0517659	-0.00329637	-0.14998	-0.0590463	0.0289116	-0.065629	-0.184456	0.51023	0.112691	-0.234417	-0.227058	0.0134912	-0.190392	-0.20606	0.295776	0.190696	-0.0862212	0.109169	-0.0687938	-0.270851	0.134651	0.112499	-0.104493	0.110797	-0.0714593	0.00564814	0.241178	0.0824485	-0.0261445	-0.213322	-0.276964	-0.121453	0.265472	-0.0846271
ALDH3B1	0.104149	0.092164	0.0632629	0.0376353	-0.219507	0.0562892	-0.0137906	-0.0676608	0.163302	-0.159432	-7.2e-05	0.0989642	-0.0372958	-0.0269308	-0.0436554	0.00723648	0.151292	0.0804963	-0.0215526	-0.0486746	0.0460463	0.242551	-0.0225415	-0.0170765	0.0964289	-0.0959096	-0.0448146	0.11246	-0.0241365	-0.196073	0.187291	0.188429	-0.0287395	0.269093	-0.09233	0.0844698	0.0147052	-0.0911698	-0.129899	-0.05584	-0.294635	0.0506692	-0.0218859	-0.132233	-0.0113845	-0.279221	0.0134015	-0.345888	0.0993567
ALDH3B2	0.00438881	0.186993	0.0832896	0.163063	-0.150193	0.0888462	-0.0195799	-0.106628	-0.0276117	-0.34717	-0.192389	0	-0.181551	0.112112	-0.0576444	-0.140961	-0.196205	-0.0109115	-0.170587	0.0739193	-0.0408378	-0.342044	-0.0825815	0.0315394	0.0484762	-0.0584178	0.0718527	0.148471	0.132573	-0.0281014	0.276041	-0.00654793	0.0336494	0.134315	-0.00992012	0.204995	0.0609837	-0.25223	0.181247	-0.0816693	0.0051918	-0.063684	-0.0421853	0.141148	0.0473032	-0.00512123	0.174179	-0.0861573	0.151035
ALDH9A1	0.189316	-0.41306	-0.030942	0.15382	0.255177	-0.0898638	0.0448914	0.0631075	0.166199	0.00917721	0.034337	0	-0.0543509	-0.155124	-0.0857134	-0.450212	-0.0398293	0.195795	0.0021677	-0.220634	0.100463	-0.328826	-0.67697	0.051548	-0.237062	-0.0710297	-0.625101	-0.102221	-0.0985508	-0.240494	-0.741908	-0.337335	-0.284533	-0.201729	-0.0325623	0.350612	0.06567	0.131347	0.10641	0.0417957	0.0227928	0.00806904	0.0760164	0.0128965	-0.156683	0.0403042	-0.293834	-0.352071	-0.5554
ALDH3A2	0.193154	0.0865431	-0.0966558	-0.0764255	0.141613	0.311073	0.209427	0.268596	-0.0504093	0.294929	0.224845	0.270395	0.374043	-0.0583315	0	0.161346	0.188364	0.110618	0.116754	-0.270857	0.216959	-0.26172	-0.851669	-0.0819263	-0.150089	-0.126747	-0.338897	-0.291071	-0.422922	-0.229118	-0.817019	-0.304759	-0.241663	-0.201985	-0.232942	0.157393	0.132309	0.163335	0.0921402	0.092308	-0.0209475	0.0465717	0.0613537	-0.104901	-0.149312	0.105552	-0.116662	-0.169526	-0.398138
ABCD2	0.113022	-0.0616446	-0.00298452	0.161884	-0.132255	-0.0905719	-0.196827	-0.00272799	-0.0315733	0.0576348	-0.347311	-0.0572247	-0.00250197	-0.0624886	-0.028491	-0.0210328	0.0488858	-0.12102	-0.234589	0.134585	-0.0955339	0.160444	0.505351	-0.00779009	-0.0505915	0.183592	0.0673494	0.242076	0.297804	0.105416	0.350977	0.00375843	0.367034	0.0182872	-0.0737472	0.176598	-0.136092	-0.0101419	-0.115839	-0.0871577	-0.0407329	0.0493093	0.0663586	-0.0606575	0.0307941	0.0714869	-0.0231867	0.332444	0.192841
ALDOA	0.129291	0.192099	-0.0872636	0.167151	-0.195323	-0.279606	-0.242093	-0.29874	-0.330029	-0.401969	-0.295957	-0.387001	-0.437225	0.0890088	0.220845	0.316979	0.276707	-0.041852	0.0705557	0.0782137	0.162953	-0.0449343	0.0622921	0.10076	0.169344	0.0768309	0.0346937	0.171288	0.144588	-0.0802207	0.0569043	-0.00882482	-0.0168266	0.136874	-0.0508456	0.0924478	-0.468439	-0.139237	-0.0556712	-0.133071	-0.382207	-0.158265	-0.281928	-0.120617	-0.0236983	-0.0668864	-0.162263	-0.137114	0.18491
ALDOAP2	0.309151	0.295185	-0.0282698	-0.00687933	0.0184731	0	-0.174955	-0.0699954	-0.12724	-0.316926	-0.144359	-0.337692	-0.291537	-0.0473642	0.00568151	0.0417953	0.06039	-0.149454	0.0775895	-0.0220642	0.112038	0.0173235	0.0563073	0.0295472	-0.0370588	-0.117415	-0.00353384	0.14001	0.0215068	0.2596	0.331202	0.0817504	0.232212	0.248809	0.0173841	0.284375	-0.21159	-0.106394	-0.0497808	-0.0545378	-0.248692	0.02459	-0.165227	0.204231	0.0390344	-0.0923567	-0.00449705	-0.362538	0.0661006
ALDOB	0.0955591	0.0439329	-0.259105	0.000176	0.127221	-0.0912514	-0.149488	-0.132538	-0.0702085	-0.0108786	0.0643082	-0.0751524	0.0699863	-0.172911	-0.0689383	-0.0501089	-0.0998888	0.063941	-0.032917	-0.260899	-0.0258303	-0.224355	-0.323261	-0.0526552	0.0880594	0.0483141	0	-0.0192919	-0.175887	-0.367019	-0.707811	0.0190506	-0.152353	0.147318	0.367365	0.117562	0.130361	-0.0107136	-0.150393	-0.273763	-0.0671845	-0.0306606	0.120155	0.0960398	-0.029418	0.133975	-0.162505	-0.12498	-0.0866175
ALDOC	-0.102923	0.221185	-0.356137	0.0370531	0.0676937	-0.59775	-0.0334997	-0.0142336	-0.109202	-0.0588074	0.161366	-0.475555	0.152637	-0.315005	-0.0997848	0.489969	0.375511	1.24313	-0.117126	0.13625	-0.0495939	-0.658709	-0.629104	0.106379	0.372419	-0.334997	-0.0294886	-0.208042	-0.0104208	-0.111235	-0.446909	0.0927954	-0.0334797	1.11096	0.0815754	0.363275	-0.114155	-0.618763	-0.254476	-0.382908	0.465258	0.0977392	0.446382	-0.466771	0.843528	-0.129431	-0.0562964	0.646061	-0.70236
AKR1B1	0.115623	-0.0118828	0.0302544	-0.0947065	0.268248	-0.584175	0.236374	0.163082	-0.03936	0.0786877	0.0447249	0.054914	-0.413251	-0.108497	-0.239004	-0.408142	0.0170317	-0.285032	0.126648	-0.0714202	0.00760698	0.43225	-0.470132	-0.18822	-0.41112	-0.00904083	-0.0487013	0.0260696	-0.166497	-0.31748	-0.214363	-0.0274177	-0.136796	-0.12557	0.0269966	0.249113	0.10452	0.0414181	0.0310917	0.0843148	0.0865927	0.0698848	-0.0453362	-0.0998812	0.133656	-0.0148282	-0.225727	-0.5055	0.175189
ALK	0.0998645	-0.0362182	-0.157708	0.0392904	-0.118	0.257646	0.156611	0.127215	0.339247	0.0235586	0.00619698	0.0477738	0.0632672	-0.0248694	-0.104422	0.219269	0	0.200514	-0.0119267	-0.0597343	-0.0964718	-0.0432096	0.236009	-0.205462	0.140413	-0.184045	-0.121798	-0.0255103	-0.0323548	0.0673838	0.00285578	-0.0149002	-0.194384	-0.00879955	-0.130412	0.206653	0.179489	-0.0933023	0.125501	-0.0253577	-0.0856662	0.21896	0.265939	-0.0890346	-0.101324	-0.301235	-0.22636	-0.0445094	0.00105143
ALOX12	0.146129	0.073657	0.193065	-0.124024	-0.0129404	0.116097	-0.100435	-0.00546837	-0.068943	-0.18339	-0.00452232	0.0538254	-0.194692	-0.0542855	-0.0366883	-0.0996551	0.0253	0.0407558	-0.036098	-0.0932097	-0.02913	-0.0971017	0.184351	-0.0454764	-0.0197835	-0.0158401	0.13533	0.155873	-0.027586	-0.00232983	0.266585	-0.0309424	0.0998521	-0.133071	-0.0338087	0.126439	-0.0120721	-0.0691419	-0.130619	0.0174675	0.0262861	-0.0333343	-0.0269856	0.0546575	0.0754595	-0.119506	0.0299873	0.0800676	-0.124886
ALOX5	0.000116	0.19588	0.172561	0.039412	-0.370876	-0.152088	-0.00238037	-0.303439	-0.068995	0.0993137	-0.0544133	-0.165453	0.126902	-0.181756	0.27222	-0.105052	0.0597816	0.00163555	-0.07513	0.389179	0.189559	0.220677	0.277926	0.0334249	-0.0774226	-0.0440526	-0.00909901	-0.0446839	-0.0551205	-0.040556	0.121236	0.186916	0.119452	0.0882406	0.132039	0.0914683	-0.323864	-0.142021	-0.0526819	-0.139079	-0.0794072	-0.110817	-0.171667	-0.195842	0.042902	0.223909	0.0477428	-0.00275612	0.0928917
ALOX5AP	-0.274731	-0.0447726	-0.196471	-0.276027	-0.126133	-0.11915	0.2169	0.194999	0.0108385	0.325216	0.115908	0.0267377	-0.0393739	0.268165	0.334344	-0.077261	0.119745	-0.0282898	0.180603	0.0300703	-0.0264435	0.151828	0.022809	-0.1642	-0.208041	-0.140004	0.0711856	0.086947	-0.0947604	-0.0809894	0.286787	0.0419893	-0.215716	-0.157928	-0.570838	-0.0537891	0.0490389	-0.00828695	-0.216138	0.208781	-0.0688591	0.124127	0.169075	-0.326601	-0.161785	-0.174419	0.00301027	-0.112	0.0373387
ALOX12B	-0.116663	0.275275	0.0775085	0.0909467	0.0244761	0.272989	-0.0527124	-0.00290298	0.148696	-0.232186	-0.086525	0.0930991	0.147947	0.0800452	0.253825	-0.0627856	0.0678735	0.250155	-0.0817494	-0.0169091	-0.071032	-0.0785642	-0.0274539	0.168861	0.0241966	0.0820079	0.0129538	0.32163	0.209367	-0.0751643	0.160655	0.0742278	0.0821719	0.271156	0.0997534	0.0722785	-0.0992269	-0.0688567	-0.0274625	0.0923252	-0.0936208	-0.146935	0.057075	-0.100723	-0.240714	0.0536737	0.0814843	-0.177107	0.101295
ALOX12P2	-0.0752196	0.00901174	-0.100864	-0.0569172	-0.271016	-0.196563	-0.00192213	-0.0884542	-0.0932145	0.13794	0.237324	-0.279417	0.12241	-0.725346	0.0654745	0.217661	0.0894456	-0.0735941	0.0619164	0.123605	0.381189	0.289639	0.237304	-0.15438	0.345714	-0.00132561	-0.46097	-0.0552983	0.187586	0.150108	0.298729	-0.464383	-0.279438	-0.307786	0.368169	-0.0781035	-0.137663	0.328333	0.218681	0.364843	0.164345	-0.110146	-0.234034	-0.057714	0.264061	-0.0185514	0.112618	0.446796	-0.0450587
ALOX15	-0.342459	0.304948	-0.00294828	-0.0912476	-0.0671859	0.187556	-0.0756669	-0.211828	0.0554991	-0.220116	-0.108421	-0.124132	0.0563898	-0.127995	-0.0051589	0.144829	0.294498	0.00996113	-0.195146	-0.0978961	-0.0471439	0.294678	0.254354	0.130561	0.132495	0.0768828	0.193287	0.262157	0.133858	-0.0260334	0.124266	0.245137	0.182961	-0.178737	-0.248782	0.0585341	-0.164611	0.510382	-0.0420389	-0.0051589	-0.0051589	0.0427995	0.020855	0.0744867	-0.139626	-0.177889	-0.0825329	0.0903716	0.0531044
ALOX15B	-0.0645232	0.184553	-0.13246	0.021616	-0.0780573	0.381632	-0.151748	-0.0300903	0.0499506	-0.321396	-0.198214	0.00394392	-0.144935	-0.0679078	-0.349762	0.0975065	0.00326157	0.0346627	-0.192795	0.0781193	-0.163794	0.0502801	0.216647	-0.084619	0.00535011	-0.0297222	0.178774	0.108662	0.236053	0.107046	0.397009	-0.153264	0.0447273	0.0385714	0.0350046	0.0326471	0.153139	-0.0706043	-0.16953	0.0767531	0.0842204	0.192307	0.0198584	0	-0.136571	-0.289475	-0.268443	-0.0136089	0.125569
ALPI	-0.244932	-0.0834913	0	0.12905	-0.129489	0.272219	0.100961	-0.0324903	0.220903	-0.261453	-0.0909143	-0.103743	-0.206583	-0.026885	-0.511453	0.0502305	-0.11648	-0.0415387	0.0474892	0.318292	-0.0398521	0.0891609	0.420048	-0.0604258	-0.0675783	0.0568089	-0.0914855	0.315921	0.189345	0.124515	0.349029	-0.171876	-0.0284824	0.127442	-0.08778	0.00125742	-0.0620947	-0.160452	0.215405	0.0609484	0.0718384	0.112679	-0.0968599	0.0896721	-0.0196791	-0.0403657	-0.0467291	0.0173483	0.0143547
ALPL	-0.193919	0.133027	0.524843	0.117138	0.21264	-0.374145	0.0216546	-0.181719	-0.0709343	0.467729	-0.230633	-0.907002	0.18206	0.610114	0.290252	0.525424	0.373155	0.511666	-0.0449486	-0.168358	0.0926785	-0.267838	-0.0535965	-0.254213	-0.0322976	-0.245213	-0.357231	0.393414	0.304715	-0.0495648	-0.0171733	0.0502358	-0.229732	0.172052	-0.350573	-0.275196	-0.277219	-0.184721	0.128672	0.0215907	-0.178026	0.0993791	0.0854464	-0.140164	0.0214005	0.306107	0.30809	0.135805	-0.0848088
ALPP	0.220647	0.763469	0.338579	0.0201874	0.0070076	0.397357	-0.0592675	0.0466909	-0.0765991	-0.400373	-0.877713	-0.029346	-0.294106	-0.0576825	0.231095	-0.249858	-0.189139	0.335815	-0.63262	0.631682	-0.0796275	0.46491	0.64791	0.315635	-0.312281	-0.274403	0.427803	0.0345402	0.161482	0.0135818	0.565111	0.147403	0.256065	0.252296	0.368135	0.227536	-0.0980053	-0.167721	-0.052671	0.047513	-0.197617	0.0572014	0.00709248	0.369961	-0.162533	0.403282	-0.0108848	0.178093	0.269672
ALPPL2	0.235291	-0.0823698	0.333871	0.434874	0.0231843	-0.188527	0.122164	-0.0817609	0.0228596	-0.00263548	-0.184153	-0.0698481	-0.340415	0.208065	-0.135119	0.0439363	-0.432625	0.0865836	-0.00216007	0.673764	-0.0251966	0.203381	-0.192791	0.0540509	0.0973816	0.0523987	0.577025	0.431922	0.163854	0.355888	0.471786	0.197216	0.133629	0.065721	0.432151	0.365304	-0.39677	-0.03686	-0.278152	-0.0921841	-0.0863667	-0.0476141	-0.148753	0.160808	-0.280015	-0.313234	-0.139072	-0.31033	0.30049
ALX3	0.0325546	0.109471	0.195221	-0.141138	0.114658	0.607132	0.177748	-0.0261526	0.122355	-0.124887	0.0234699	0.0189838	0.00382519	0.183086	0.197234	0.22062	0.311008	0.156217	0.011641	-0.0791645	-0.355443	-0.108774	0.112247	-0.516168	-0.0661578	-0.0172577	-0.132981	-0.118467	-0.102685	0.033936	-0.257907	0.0287986	0.113314	0.130903	0.0192032	-0.0947285	0.0733895	0.2557	0.131474	0.140004	0.287581	0.1519	0.0191884	-0.0936446	-0.113602	-0.49328	-0.159879	0.0706062	-0.11378
AMBN	-0.0555925	-0.0247474	0.122006	-0.0395374	0.0358195	0.0110021	-0.0627275	0.0032897	-0.0783782	-0.112814	-0.0606508	0.0606394	-0.124317	-0.0423837	0.100088	0.205001	-0.0145926	0.0208988	0.0628643	-0.0912318	-0.0520525	0.0631256	0.179058	0.060041	-0.102692	0.199005	0.1325	0.112364	0.195904	0.088623	0.150794	0.0692616	0.00305367	0.192345	-0.0555372	0.0145974	-0.0979342	0.0610499	-0.130064	-0.149427	-0.00885773	-0.0632882	0.183409	0.170452	-0.0329809	0.0243187	0.0673842	0.136782	-0.0797524
AMBP	0.135097	0.139828	-0.141028	-0.0980024	0.286024	-0.0392218	0.231192	0.261964	0.138099	0.169622	0.165987	0.157312	-0.193714	-0.38964	-0.241779	-0.330417	-0.335517	-0.220447	0.211839	-0.21233	0.017992	-0.463591	-0.476604	-0.118953	-0.20631	0.0275011	-0.184015	-0.0638561	-0.170728	-0.267121	-0.552321	0.00744533	-0.177761	0.121786	0.0328617	0.00727749	0.244278	0.251159	0.158406	0.12384	0.21862	0.133167	0.287943	-0.106209	-0.139476	0.0533104	-0.0924511	-0.375533	-0.0455971
AMD1	-0.260786	-0.557813	-0.0840063	0.115553	0.443695	-0.0479074	0.384372	0.397113	0.259741	0.860626	0.388729	0.218773	0.0881386	0.0812488	-0.380523	-0.146104	-0.244583	-0.223356	0.684788	-0.210491	-0.0800328	-0.146596	-0.417948	-0.587844	-0.0703096	-0.466187	-0.261503	-0.308269	-0.3763	-0.673897	-0.244155	-0.38239	-0.302619	-0.414119	-0.360256	-0.120287	0.184195	0.358748	0	0.431103	0.364303	0.29871	0.296244	-0.0996571	-0.00473642	-0.14694	-0.224272	-0.0834432	-0.845646
AMELX	-0.00180292	-0.0378585	-0.0657167	-0.047472	-0.0329809	-0.0843134	0.0556145	-0.0238309	0.0585322	-0.075326	-0.117362	-0.0399623	-0.00643206	0.0747442	0.195605	0.120039	-0.134941	0.127921	0.14429	-0.0408936	0.13984	0.0166721	0.114966	-0.0327058	0.123881	0.110642	-0.078578	0.219531	-0.0539765	0.194826	-0.0197158	-0.0672398	0.209899	-0.0783982	-0.0566692	-0.0329576	0.0258842	-0.0139194	0.059545	0.133114	-0.0455213	-0.00958538	0.0684438	0.115209	0.00686884	0.049118	0.00869274	0.122145	-0.0814204
AMELY	-0.0539775	0.115535	-0.0216217	-0.0553594	-0.0397959	0.00224686	0.0651937	0.0228829	0.038518	0.0682321	0.0243959	-0.048368	-0.0248694	-0.0054779	-0.0538096	0.049336	-0.0634646	0.0739708	-0.0737286	0.0198193	-0.0137262	-0.0527663	0.161955	0.0500617	0.175457	-0.0583458	-0.0229263	-0.0177302	0.0999522	0.00508404	0.237948	-0.0598011	0.0317111	0.0480967	0.0452466	-0.0366516	-0.106569	0.0573254	0.0209341	0.0297217	0.0820007	0.0187759	-0.0554147	-0.0197353	-0.0689611	-0.0272455	-0.0178099	0.0482464	0.0670757
AMFR	0.131269	0.109617	0.0489702	0.249409	-0.0248661	0.0216045	-0.0998373	-0.114541	-0.135447	-0.0712862	-0.16053	-0.287842	-0.0259409	0.187398	0.311692	0.127638	0.076581	0.184806	-0.134026	-0.171186	0.112434	-0.360345	-0.79557	0.0873985	-0.0136957	-0.017909	0.046874	-0.0225496	-0.517556	-0.0155859	-0.456455	-0.00470924	-0.324776	-0.0332994	0.253801	0.363606	-0.23031	-0.00309849	-0.100018	-0.226487	0.0253563	-0.330757	-0.159095	0.0604305	-0.0961018	0.0943022	-0.189396	-0.365313	-0.332767
AMH	0.0801907	0.228277	0.14233	-0.0334878	-0.196279	0.269936	-0.0202708	-0.111294	-0.0279074	-0.47088	-0.190199	-0.16923	-0.124287	-0.0788603	0.255311	0.0887523	-0.129432	0.154811	-0.108889	-0.257556	-0.0795746	-0.050601	0.142718	0.00783062	0.071094	0.112401	0.157756	-0.010613	0.126564	-0.218935	0.465579	0.277107	0.203108	0.210026	0.0399981	0.0708389	-0.0409241	0.025733	0.150904	0.166374	0.0532131	-0.0128989	0.0436778	0.0721979	-0.152221	-0.193976	-0.0735221	0.0579324	0.194179
AMHR2	-0.0746999	0.215368	0.0277314	-0.00140858	-0.0295539	-0.0846825	-0.0681033	-0.0253181	-0.0189433	-0.185806	0.0868225	-0.0886426	-0.284016	-0.125081	0.15913	-0.0625024	-0.203126	0.0507083	-0.085947	-0.166749	0.00580788	0.105512	0.128742	0.139606	-0.272089	0.156637	0.00937557	0.0834317	0.143877	0.0147543	0.101631	-0.19795	0.138031	0.0579233	-0.0376348	0	0.10895	-0.0116363	-0.03825	0.0761447	0.0824142	-0.108122	0.0720301	0.0705557	0.071876	-0.0868425	-0.112355	0.0733976	0.138361
AMPD1	0.0958891	0.0986404	-0.14304	-0.046864	-0.0850797	-0.111123	0.0398374	0.124618	0.193445	0.312146	-0.0341511	-0.130363	0.0212941	0.473517	-0.0998077	0.141929	0.0825458	0.116828	-0.00819159	0.0206809	-0.0380077	-0.0620551	0.396718	0.215729	0.055162	0.387657	-0.0173368	-0.0167003	0.0851626	0.0949392	0.15751	-0.0710511	-0.110699	0.0689716	-0.0928922	-0.0679073	-0.163528	0.0503154	-0.068769	-0.113529	-0.0336795	-0.0531888	0.00521183	0.211201	0.024756	0.0567074	-0.0351963	0.0585976	-0.0506835
AMPD2	0.105503	-0.093308	-0.130098	0.00695372	-0.268711	-0.0315738	-0.323734	-0.269865	-0.462747	-0.492697	-0.322986	-0.310725	0.281172	0.0608449	0.220239	0.179088	0.070199	0.33825	-0.102344	0.091475	0.175148	0.00939035	0.278318	0.26615	0.00641489	0.416753	-0.0401111	0.0159574	-0.0437427	0.0230422	0.358591	-0.169969	-0.0917749	0.0905972	0.0729885	0.302745	-0.384098	-0.245281	-0.0537496	-0.277293	-0.335003	-0.459913	-0.408112	-0.0534596	0	0.0115628	0.222184	0.409459	0.334349
AMPD3	-0.00217438	0.28689	-0.0409565	-0.025342	-0.138026	0.249763	0.0772824	-0.0373125	0.125198	0.24229	0.116582	-0.0678301	0.264293	0.0447941	-0.16116	0.0638766	0	0.369052	0.200109	-0.0482426	-0.0631518	0.10005	-0.0460405	0.137207	0.198367	-0.0237832	0.0199981	0.0688028	-0.0801787	-0.11247	0.131817	0.0335331	-0.0337882	-0.423202	-0.0564637	-0.0453944	-0.0874753	-0.115343	-0.0954695	0.0878854	0.157855	0.1345	0.289633	-0.148563	-0.0815873	0.0425506	-0.132827	-0.00327873	-0.0403566
AMPH	0.0491233	-0.0017724	0.0844383	0.0363798	-0.0168505	0.405686	0.0212083	0.0301032	0.0632267	0.037384	-0.13588	0.00166369	-0.0133252	-0.0393643	-0.020967	-0.153185	0.0781712	-0.0140276	-0.207597	0.0940814	0.266944	0.106838	-0.119202	-0.181075	0.126191	0.0442862	0.103196	0.0166078	0.0756173	0.0505867	0.0598936	0.00794744	-0.107327	0.206581	0.226163	0.0281687	0.0478377	-0.0434933	0.0816512	-0.0651731	0.104353	0.139618	0.0539966	-0.044755	-0.0300279	-0.00878859	-0.13572	-0.0342689	0.0359764
BIN1	-0.0545397	0.127206	-0.0585489	0.0394425	-0.0147963	0.066308	-0.19891	-0.0200043	-0.0166402	-0.276968	-0.186662	-0.113006	0.125908	-0.0661149	0.134431	0.212807	-0.00794697	0.16819	-0.295655	0.135518	-0.00254106	-0.0250959	-0.00250769	0.0432315	0.0980678	0.320324	0.229685	0.113223	0.27762	0.048048	0.124416	0.0355191	0.0233951	0.113831	-0.00325728	0.267627	-0.0787015	-0.0351658	-0.10989	-0.16838	-0.0335827	-0.044344	-0.0275645	0.130864	0.107673	0.0476894	-0.00421381	0.12079	0.20617
AMT	0.254574	0.0784717	0.0811815	0.0876985	0.00180054	-0.545377	-0.394155	-0.488309	-0.116241	-0.364438	-0.223751	-0.393589	-0.064323	-0.0847101	0.0444198	0.0493865	-0.0745439	-0.257078	-0.0358133	0	0.424565	-0.183839	-0.0414286	0.12781	0.264809	0.290633	0.168797	0.191805	0.40098	0.180715	-0.0656972	-0.0942717	-0.281504	0.00147152	0.294623	0.1892	0.0556645	-0.0666962	-0.0744929	-0.0186605	-0.233792	-0.189988	-0.168165	0.251194	0.234131	0.421133	0.111084	0.264548	0.190376
AMY2B	-0.156214	0.0224237	-0.484839	-0.361705	0.114774	-0.364779	0.228229	0.098362	0.217977	0.532412	0.432712	0.281754	0.279242	0.0146646	0.148663	-0.386369	-0.00322819	-0.0399017	0.0422049	0.0388374	0.0647325	-0.19697	-0.229724	-0.128801	0.164853	-0.0073328	-0.171643	-0.244778	0.136511	0	-0.0264692	-0.036377	-0.363505	-0.521798	-0.0706463	-0.0312881	0.428239	0.00888729	0.30671	0.14607	0.256395	0.398743	0.303217	0.122916	0.190781	0.315982	-0.0830021	0.403208	-0.429793
ANGPT1	-0.0992389	0.232386	0.0118289	0.044138	-0.0508518	-0.0442839	0.0217199	-0.0843697	0.0218091	-0.0401764	-0.0941768	0.0458326	0.148518	0.126976	-0.0154238	0.0263453	-0.172728	-0.101938	-0.134311	0.30045	0.0321746	-0.065208	-0.118368	0	-0.0699439	-0.0864005	0.087038	0.193688	0.143676	-0.126487	0.226351	-0.0117211	0.130499	0.0319614	-0.0366411	-0.0143437	-0.0501833	-0.0845847	0.000142	0.0783868	0.0950746	-0.117078	0.163387	0.141005	-0.0433788	0.107487	-0.123943	0.117452	0.0552115
ANGPT2	-0.0991497	0.285095	0.0166082	0.0363483	-0.0175791	-0.291137	-0.0198431	-0.317381	-0.387889	0.327116	-0.32655	-0.250154	0.432824	-0.198943	-0.224737	-0.13673	0.406383	0.0021019	0.411903	0.679279	-0.0584345	-0.218332	0.351827	-0.182245	-0.431213	-0.10113	-0.271798	-0.418218	0.439159	-0.271336	-0.111707	0.00796795	-0.287738	-0.393504	0.212694	0.0305724	0.166102	-0.447924	-0.265148	0.518658	-0.0166326	0.723878	0.338881	-0.186882	0.32902	0.332798	-0.140186	-0.242216	0.012989
ANK1	0.15956	0.124151	0.181815	0.0704193	-0.058373	0.167429	0.0449243	0.012373	0.0363164	-0.137157	0.00713968	-0.136379	-0.214735	0.119302	-0.0901632	-0.0382462	-0.0455384	-0.0029974	-0.102469	-0.0387897	-0.0617228	-0.00317001	0.151317	-0.0579515	0.241611	-0.049921	0.0818925	0.214764	0.0229993	0.162778	0.261548	0.0417304	0.109697	0.194435	-0.0554404	-0.0833759	0.0438051	0.0862637	0.0771608	-0.0585127	0.0490055	0.0573449	-0.0573468	-0.0764961	-0.168298	-0.137432	0.0205812	-0.0823016	-0.0371799
ANK2	-0.00563097	0.0433311	-0.0929527	0.0045166	-0.0318885	0	0.0928373	-0.00486326	-0.0712433	-0.00870419	-0.0794754	-0.0999889	0.0490994	0.184426	0.0424585	0.0634575	0.188573	0.142455	-0.200671	0.0416088	0.0501552	-0.109414	-0.0467625	-0.0217562	0.14351	-0.118701	0.0127182	0.143881	0.15482	0.0228615	0.0774446	0.155166	-0.179642	-0.0684056	-0.169471	-0.0507741	-0.12059	0.021327	-0.188483	0.0636239	-0.129792	0.00996828	0.0511436	0.196646	-0.134822	0.0988913	-0.16574	-0.037879	0.0372596
ANK3	-0.279751	-0.336943	-0.256303	-0.228655	0.0122356	0.141385	0.376563	0.170234	0.149166	0.344869	0.097414	-0.0577083	0.453258	0.247059	-0.240604	-0.343018	-0.0291018	0.104405	-0.480264	0.337106	0.255567	-0.447705	0.226757	-0.164138	0.201416	0.00742865	-0.069838	-0.0783663	0.055841	0.0800624	-0.113031	0.132289	-0.169315	-0.26044	0.121943	-0.669243	-0.240877	0.46263	-0.353932	0.0619392	0.245058	0.221118	0.11434	0.108553	0.0162263	0.206359	-0.163338	0.147969	-0.163518
ANPEP	-0.123143	-0.110543	0.19549	0.199064	-0.443916	-0.257301	-0.376241	-0.717127	-0.4454	-0.716834	-0.644882	-0.53509	0.533657	0.337585	0.728838	0.516709	0.581681	0.673341	-0.337742	0.0128508	0.286094	-0.58772	-0.518705	-0.0627985	0.101703	0.565937	0.231562	0.220321	0.216206	-0.0895748	-0.443662	0.356396	-0.156582	-0.179235	0.251534	0.0521154	-0.374088	-0.436147	0	-0.376493	-0.415734	-0.683844	-0.762444	0.268058	0.342888	0.39708	-0.178001	-0.0420504	0.140649
SLC25A4	0.243283	0.0116053	0.0978575	0.2328	0.00539684	0.106823	-0.0188026	-0.0303774	-0.305019	-0.274303	0	-0.331875	-0.179858	-0.414592	-0.132963	-0.481015	-0.367795	-0.0246258	0.172809	-0.301994	-0.0672741	-0.38698	-0.950345	0.0455894	-0.0875092	-0.369572	-0.0759478	-0.333616	-0.100212	-0.311542	-0.716647	-0.0402737	-0.048399	-0.043025	0.167713	0.15923	0.10646	-0.0707045	-0.216255	-0.0503616	-0.29104	-0.120688	0.103438	0.0252085	-0.269849	-0.205135	-0.0179167	-0.433501	-0.564791
SLC25A5	-0.0272894	0.0258894	-0.368544	-0.00635147	0.065135	0.450781	0.00203133	0.140234	-0.00541496	-0.0717668	0.0964165	-0.0992851	0.167798	-0.0716848	0.149519	0.0352402	0.00950146	-0.0287762	0.0835886	-0.226463	-0.0566845	-0.406247	-0.499027	0.153057	-0.122488	0.105501	0.0972061	0.0165586	-0.0416107	-0.115235	-0.291541	-0.258897	-0.230182	0.212759	0.311091	0.0065527	0.114127	0.0725479	-0.0556135	0.00630856	0.168401	0.00569248	0.08319	-0.163937	-0.229393	-0.059988	-0.00489616	-0.298395	-0.256372
SLC25A6	0.0022049	0.345853	0.388758	0.185235	-0.133119	-0.332099	-0.365959	-0.0883894	-0.148536	-0.335604	-0.278982	-0.228907	-0.394923	-0.14356	-0.229315	-0.20589	-0.132822	-0.247252	-0.0404921	0.294863	0.16045	0.0369272	-0.424379	0.144764	0.170241	-0.0155497	0.201815	0.344309	0.128181	-0.270226	-0.0740652	0.289645	-0.010376	0.388815	0.34248	0.160767	-0.0787001	-0.0233393	-0.33375	-0.238938	-0.095232	-0.170339	-0.0740061	0.150888	-0.248213	0.0541468	0.10343	-0.207569	0.422911
ANXA1	-0.302416	-0.26697	-0.0190558	-0.179876	0.349778	-0.225307	0.639886	0.530443	0.725288	0.933639	0.743584	0.417287	-0.218827	0.592111	-0.785068	-0.425701	-0.170068	-0.44008	0.165376	0.0977106	-0.0192394	-0.261289	-0.790745	0.313885	-0.274547	-0.451485	-0.104171	-0.20377	-0.247421	-0.360269	-0.17881	-0.0870376	-0.0281711	-0.436149	-0.43185	-0.0924373	0.204152	0.526067	0.032702	0.317008	0.288562	1.115	0.755982	-0.137728	-0.071219	0.092248	-0.0224524	-0.39612	-0.303717
ANXA2	-0.617952	-0.046689	0.0519514	-0.540487	0.159057	-0.463287	0.00272226	-0.00505066	-0.189399	0.439755	0.124576	0.188159	-0.15372	0.139977	-0.380788	-0.443434	-0.268288	-0.712952	0.0843515	0.269321	0	-0.283637	-0.552219	-0.335195	-0.0229506	-0.565471	-0.608798	-0.502914	0.157188	-0.0551085	-0.281548	-0.0735126	-0.547068	0.011241	-0.236662	-0.217728	-0.184159	-0.0577321	-0.201648	0.0135579	0.231754	0.320477	0.394846	-0.576118	0.186398	0.0603862	-0.0297246	-0.380571	-0.412684
ANXA2P1	-0.129034	-0.012146	0.0710068	-0.177024	0.165098	-0.616686	-0.0480251	0.219193	-0.104666	0.266076	0.194621	-0.072999	0.0462022	0.048162	-0.470192	-0.304111	-0.330194	-0.491492	0.241056	0.0506697	-0.0897036	-0.225556	-0.187055	-0.418395	0.0422444	-0.210526	0.0607934	-0.307983	-0.29517	0.0169206	-0.129849	0.0965943	0.0535803	0.0130372	-0.0138927	0.267632	-0.178545	-0.202972	-0.278917	0.0423112	-0.0618024	0.426514	0.403198	-0.485454	-0.0884762	-0.0488229	0.0356474	-0.197798	0.038784
ANXA2P2	-0.412443	-0.511873	0.147941	-0.214069	-0.0258961	-0.953689	-0.0769644	0.0763502	0.099823	0.156029	-0.000546	-0.0829992	0.0923891	0.198962	-0.340631	0.0131817	-0.00367451	-0.140573	0.00589371	0.034092	-0.178048	-0.0220146	-0.442959	-0.304979	0.232821	-0.514915	-0.755635	-0.218745	-0.389115	-0.487771	-0.479539	-0.236948	-0.373445	-0.207241	-0.28967	-0.174103	-0.34663	0.061451	-0.656371	0.0377283	-0.118243	0.202613	0.496082	-0.379179	0.453319	0.198822	-0.313034	-0.418442	-0.148219
ANXA2P3	0.151942	0.0668368	0.159391	0.316823	-0.11342	-0.127608	-0.120666	0.152523	0.0954838	0.0981026	0.162266	-0.120963	0.181787	-0.0976219	-0.0526733	-0.125893	-0.137638	-0.0263867	-0.126504	0.0663853	-0.0729017	-0.0495491	-0.410667	-0.0996256	0.0583973	-0.159843	-0.0216637	0.0636167	0	0.0675282	-0.119151	0.0310254	0.102471	0.36537	-0.293447	0.0914807	0.101038	-0.0313225	0.0876279	-0.281516	-0.30266	0.0595121	0.139224	-0.0240822	-0.262294	-0.010478	-0.326249	0.0389438	-0.061903
ANXA3	-0.0559936	-0.125227	0.305945	0.262582	-0.0120587	-0.215842	0.205546	0.0769959	-0.167438	-0.0360956	-0.12676	-0.0833611	-0.0500131	-0.0430794	-0.100146	0.00682402	-0.138462	-0.258289	-0.0838337	0.139817	-0.00150299	-0.297097	0.133734	0.0596499	0.0544043	-0.0606694	-0.0178604	0.130518	0.16612	0.116567	0.117715	0.121283	-0.048449	-0.0389633	-0.168829	-0.0845242	-0.158349	0.104318	-0.00473404	-0.216395	0.124763	0.128562	0.185085	-0.056448	-0.110677	0.161224	-0.0729427	-0.0665541	-0.0872431
ANXA4	0.0788851	-0.602757	-0.195745	-0.0363741	0.445677	-0.302925	0.218858	0.300655	0	0.746066	0.524756	0.174007	0.171405	0.145247	-0.11375	-0.138906	0.0115414	0.249487	0.398826	0.25018	0.261505	-0.162596	-0.591942	-0.0197639	0.212888	-0.244293	-0.255608	-0.201971	-0.442765	-0.0474081	-0.673852	-0.138429	-0.0541506	-0.298632	-0.530634	-0.161873	0.335	0.199667	-0.0870295	0.221827	0.462211	-0.0670414	0.659089	-0.0704784	-0.175883	0.0394917	-0.0699816	-0.306602	-0.245681
ANXA5	-0.195218	0.240969	0.184192	0.239508	0.175282	-0.52487	0.0972662	0.165585	0	0.373969	0.205523	0.27844	0.0878382	-0.101113	-0.100022	0.277452	0.747771	-0.335925	0.10285	0.183418	-0.153541	-0.368674	-0.706808	-0.127282	-0.242983	-0.384296	-0.350758	-0.171835	-1.01453	-0.266079	-0.734467	-0.0569515	0.0983686	-0.225734	-0.253881	-0.0024519	-0.229868	-0.284818	-0.139738	0.0105143	0.0805864	0.256732	0.185442	-0.251278	0.0184793	-0.413388	0.211975	-0.443302	-0.318094
ANXA6	0.864901	0.0449572	0.370731	0.336	0.341021	0.0592804	0.0773888	-0.0414934	-0.0947247	-0.299063	-0.353548	0.0266161	-0.0318546	-0.486203	-0.389704	0.240062	-0.459671	-0.248915	-0.0362911	-0.284238	0.077261	-0.572151	-0.204229	0.342067	-0.0961046	0.259674	-0.0716982	-0.00594425	0.301754	0.393556	-0.214989	-0.4361	-0.318327	0.684608	0.247549	-0.222478	0.0293999	0.47582	0.0302753	0.366916	-0.0434256	-0.180052	-0.183682	-0.273168	-0.313111	-0.434282	-0.0549593	-0.587337	0.00291729
ANXA7	0.00573826	-0.0896873	-0.144494	0.0366659	0.483103	-0.160082	0.168794	0.345711	0.0686874	0.47489	0.355913	0.118452	-0.162107	-0.24626	-0.703906	-0.365453	-0.134725	-0.0404482	0.348682	-0.155633	0.120187	-0.362051	-0.774514	-0.0714035	-0.224769	-0.140058	-0.35968	-0.177743	-0.350314	-0.476328	-0.67831	-0.183535	-0.187749	0.0308762	-0.302183	0	0.296047	0.211899	0.137739	0.218665	0.135159	0.121875	0.401557	-0.100949	0.0678854	0.00418377	-0.204535	-0.253112	-0.396365
ANXA11	0.135633	0.270929	0.095789	0.0124674	-0.0448399	0.101797	0.015233	-0.139048	-0.0959878	-0.16506	-0.135813	-0.0473204	0.427393	0.410445	0.331017	0.338837	0.231041	0.411884	-0.0856481	0.0164843	0.204129	-0.288875	-0.388998	0.00466633	-0.0874839	0.133258	-0.0620775	0.114315	0.260014	-0.0824981	-0.236691	0.0768967	-0.0865583	0.138893	-0.00782013	0.0437679	-0.238528	0.0283594	-0.225055	0.0557289	-0.125724	-0.0753927	-0.148086	0.00868702	0.0228176	0.0567312	-0.11906	-0.100148	0.193596
ANXA13	0.263059	-0.261383	-0.595972	-0.193526	0.643175	-0.234909	-0.45151	-0.00739765	-0.394937	-0.493721	-0.561635	0.435444	-0.473344	0.263084	-0.558941	0.0377512	-0.74909	-0.26203	-0.0775681	0.131396	0.447215	-0.055707	0.121575	-0.602981	-0.447486	0.601641	0.220416	0.283045	0.465649	0.272797	0.0683713	-0.313671	0.110328	0.660076	0.114609	0.164941	-0.546195	-0.539388	0.528412	0.705965	0.359746	0.0223322	0.531879	0.203715	0.0510826	-0.244941	0.0935454	0.266975	-0.257806
AOAH	0.0218596	-0.229339	0.383044	-0.258887	0.136418	0.0284686	0.5028	0.732359	-0.20261	0.926519	0.329235	0.407626	0.325162	0.0860157	-0.350726	0.115939	-0.0932922	-0.68644	0.469945	-0.0254169	-0.10595	0.329724	-0.487956	0.0546756	0.0296965	-0.20932	-0.44732	-0.112943	-0.483229	-0.263979	-0.562834	0.0827045	0.0916138	-0.333257	-0.453943	-0.0810022	0.0854597	0.166423	0.304222	0.359374	0.0604548	0.512538	0.183455	0.0230436	0.188102	0.309962	-0.199759	-0.213205	-0.354287
AOC2	-0.255525	0.00854683	0.103825	-0.0802116	-0.137976	0.270154	-0.184201	-0.0849767	-0.10755	0.119472	0.0873694	0.022603	0.0793381	0.112565	-0.0323944	-0.0735807	0.0676436	0.0627699	0.077713	0.00559187	-0.184876	-0.0400915	0.222565	0.0332465	0.0633054	0.182622	-0.191349	0.100325	0.126379	0.195728	0.261357	-0.205502	-0.147115	-0.105954	-0.141832	-0.0958519	0.0411992	-0.145062	0.0515556	0.130534	0.012826	-0.0463619	0.040473	0.182008	0.248802	-0.0515881	0.20506	0.316806	0.100343
AOX1	0.0751095	-0.15804	0.360736	0.00693417	0.299529	0.218997	0.474282	0.393972	0.0317001	0.542142	0.0647726	-0.0844727	0.116531	0.110337	0.091074	0	0.117599	0.241882	0.0787087	-0.521705	0.216134	-0.577822	-0.747359	-0.15823	-0.0890884	-0.206632	-0.593812	-0.12584	-0.457696	-0.597035	-0.783544	-0.0428591	-0.287317	-0.238638	-0.442659	0.0841742	0.245839	0.226416	0.460934	0.126139	0.0374222	0.29682	0.145844	-0.0303526	-0.105284	0.300613	-0.191107	-0.503418	-0.728448
APAF1	-0.246258	0.00649834	-0.18527	-0.282802	0.119423	-0.0603027	0.139891	0.0911603	-0.0413985	0.599833	0.314133	0.158016	0.140789	0.0833082	-0.171152	-0.0988302	0.142957	-0.191771	0.0235953	0.0329189	0.104735	-0.0338221	-0.157382	0.000286	0.112502	-0.149817	0.0804005	-0.260909	0.00342226	-0.239616	-0.403912	-0.0804644	-0.311027	-0.138635	-0.314147	-0.183342	0.323005	0.179785	0.138285	-0.0494795	0.247248	0.109811	0.151955	-0.0958099	0.0387764	0.00581837	-0.233593	-0.12051	-0.324187
NUDT2	0.191564	0.0693326	0.0621161	-0.113348	0.247929	-0.160742	0	0.127748	0.102633	-0.208183	0.0470133	-0.0335555	-0.0354791	-0.279177	-0.36186	-0.20165	-0.375632	-0.168902	0.105728	-0.0963755	-0.0841317	-0.24758	-0.0676594	-0.175426	0.0877657	-0.12717	-0.213074	-0.0651436	0.110254	-0.0587406	-0.160197	0.0759368	0.0774507	0.133592	-0.0868139	-0.0411162	0.0293069	-0.116737	-0.0164099	0.0202465	-0.0402679	0.145465	0.238565	-0.0723467	-0.0898519	0.186749	-0.0891027	-0.149198	0.117059
APOF	-0.4532	-0.0933514	-0.149366	0.13368	0.436894	0.0607786	0.118859	0.524481	0.728279	0.984468	0.35142	-0.490025	-0.0362768	0.324345	-0.0411425	-0.103907	-0.39645	0.0253296	0.396358	-0.30306	0.243222	-0.572158	-1.05199	-0.939265	-0.31844	-0.615189	-0.315983	-0.456923	-0.443017	-0.511147	-0.969526	0	-1.06213	-0.510589	-0.463133	-0.515777	-0.00164795	0.422157	0.724826	0.416534	0.157989	0.59914	0.346807	-0.342639	-0.338155	0.534797	-0.122603	-1.01719	-0.668437
APBA1	0.258396	0.40465	-0.178614	-0.0422001	-0.0834665	0.229613	0.153621	-0.0486951	0.188789	-0.182232	-0.0591493	-0.0698428	0.304987	0.673624	0.214567	0.241462	0.0376277	0.773081	-0.107113	-0.30174	0.488884	-0.257981	0.0838609	0.263017	0.102617	0.0624413	0.376206	-0.319743	0.213044	-0.0136394	-0.358547	0.373812	-0.174028	0.236873	0.0990243	0.154687	0.0765243	0.0913744	-0.123197	-0.0271935	-0.195688	-0.0777779	-0.0136795	0.482179	0.318069	0.156675	-0.373871	0.240927	0.169366
APBA2	0.0429468	0.17902	0.178736	-0.0308743	-0.0215416	0.220205	-0.0855441	0.0286508	0.102175	-0.0516119	-0.15876	-0.0646677	-0.248995	0.272749	0.266835	0.222541	0.165995	0.0206642	-0.122574	-0.0453401	-0.123225	0.0314279	-0.0868883	-0.176619	-0.172378	-0.147516	0.0374584	0.388535	0.0446625	0.00510693	0.185258	0.0597873	0.146938	-0.040988	0.18591	0.127614	-0.0242591	0.0940037	-0.148386	-0.0288377	-0.0909386	0.111541	0.070754	-0.159927	-0.0775943	-0.140415	-0.0896964	-0.0522943	0.163443
APBB1	0.014647	0.254622	0.180184	0.140523	-0.162722	-0.10357	-0.0736208	-0.203077	0.0704789	-0.0179925	-0.177963	-0.249548	-0.0045023	0.00698471	0.0197926	-0.229323	-0.101885	-0.254195	-0.153878	-0.0771184	0.27732	-0.180878	0.120326	0.313582	0.0409803	-0.0270848	0.0335259	0.006001	-0.0407028	0.178219	0.19619	0.0547671	-0.101696	0.0170197	0.318377	0.101588	-0.110961	-0.258529	-0.158474	-0.155148	-0.274914	-0.0262485	-0.0914245	0.0801873	0.31358	0.128938	0.115308	0.124903	0.159557
APBB2	-0.187263	-0.0553818	-0.327533	-0.480199	-0.00898647	0.0898857	0.317332	0.0786362	0.0242453	0.0923548	0.0754328	0.183575	0.455857	0.509075	0.421074	0.190162	0.181689	0.281633	-0.0593052	0.0259523	-0.0593271	-0.254311	0.0973825	0	0.127257	-0.0250015	-0.144278	-0.0501747	-0.229923	-0.0739965	-0.440489	-0.088726	-0.198908	-0.595609	0.109011	-0.156868	0.240071	0.350072	0.413163	0.0195799	0.149813	0.0105658	0.0540352	0.244775	0.213893	0.540102	-0.253402	-0.0172024	0.0532465
APC	0.0383711	-0.302256	0.0123506	-0.108097	0.166012	-0.164111	0.110557	0.195065	-0.0704513	0.186153	0.290721	0.135344	0.0585546	-0.0766478	-0.297729	0	-0.231586	-0.270233	0.103953	-0.0223947	0.0454812	0.00443125	-0.308836	0.115452	0.0546975	-0.0430698	0.070569	-0.104108	-0.343384	-0.0119553	-0.294504	-0.116966	0.0651417	-0.276077	-0.227179	0.0924101	0.0999441	0.112377	-0.0150552	-0.0529842	0.00339031	0.169841	-0.0304003	-0.0774341	-0.056849	0.273516	-0.0889535	-0.0786042	-0.185404
APCS	0.342321	0.133383	0.46445	0.397506	0.237708	-0.144905	-0.159147	0	-0.226086	0.201498	-0.129868	0.00567341	-0.00109673	-0.218932	0.230303	-0.184691	-0.25939	-0.137482	0.141934	-0.0754013	0.031806	-0.368379	-0.31929	-0.0567818	0.275228	-0.0392962	-0.101648	0.19183	-0.357238	-0.133513	-0.411806	-0.00749397	-0.159572	0.118446	-0.125345	-0.0804176	0.183455	0.137807	0.172986	0.270411	-0.195191	0.16125	0.179769	-0.178814	0.0327511	0.244801	0.133276	-0.466773	-0.220449
AIRE	-0.0457554	0.292241	-0.0868959	0.0555949	-0.174627	0.131669	0.0232115	-0.191822	0.18469	-0.340176	-0.263677	0.0261049	-0.161496	-0.149467	-0.00655127	-0.1517	-0.274114	-0.0777245	-0.0677047	0.182221	-0.321682	0.189398	0.0582652	-0.201853	-0.00209332	-0.229213	0.0428286	-0.0282731	0.0826163	0.275772	0.361133	0.0183711	0.100908	0.151176	-0.100173	0.00469112	-0.165867	0.0831962	-0.214376	-0.0568876	-0.0813279	0.0747962	0.0857115	-0.000515	-0.17049	-0.226081	0.0380506	0.203461	0.052238
APEH	0.19667	-0.184643	0.146611	0.0967913	-0.160721	-0.0737619	-0.0607872	-0.167636	-0.0915899	-0.358996	-0.202639	-0.42668	-0.20743	0.0574083	-0.0664978	0.0799236	-0.332819	-0.0785971	0.0539341	-0.0864792	0.308843	-0.373538	-0.491192	0.137116	0.106327	0.409021	0.109363	0.213013	-0.0289354	0.145782	-0.0570908	-0.0350351	-0.198737	-0.0346165	0.469909	0.342239	0.0244226	0.0307627	-0.00697613	0.0261345	-0.140787	-0.0911732	-0.0618114	-0.0101261	0.101577	0.131792	0.0947866	-0.109291	0.113111
APEX1	0.035615	-0.259922	0.0118599	0.00779724	0.141084	-0.377047	0.0178642	-0.0279732	-0.246272	0.0502758	0.0290785	-0.0443163	0.152996	-0.24463	-0.18717	-0.176527	-0.121239	0.0107965	0.276904	-0.177673	-0.107679	-0.228373	-0.479117	-0.137415	-0.0381231	-0.109312	-0.0555944	-0.3001	-0.444599	-0.335213	-0.690202	-0.387526	-0.262728	-0.278874	-0.00106525	0.124882	0.124907	0.0658197	-0.148474	0.0401888	0.0408211	-0.0761948	0.0979748	-0.198424	-0.212594	-0.0749207	-0.0741825	-0.222105	-0.184785
BIRC2	0	-0.39982	0.123727	-0.13782	0.281681	-0.225859	0.123068	0.102842	0.0464678	0.456922	0.390968	0.437796	0.447022	0.209252	0.220484	0.024641	0.184355	0.0411425	0.364962	-0.0602818	-0.0407715	-0.0735817	-0.416659	-0.059123	0.0179625	-0.450968	-0.57344	-0.409279	-0.525351	-0.367927	-0.601791	-0.474251	-0.227036	-0.258489	-0.111772	-0.0140591	0.298645	0.0395794	-0.00676918	0.0336685	0.129468	0.100558	0.15915	-0.0801783	0.0984736	-0.0282726	-0.0436058	0.0898228	-0.627159
BIRC3	-0.213047	0.200426	0.195019	-0.364123	0.17412	-0.442434	1.03839	0.606444	-0.0997801	1.25379	0.828505	0.121513	-0.0792656	0.631386	-0.569404	0.0482516	-0.00773621	-0.132062	0.362624	0.0687466	-0.157331	-0.231219	-0.586583	-0.20361	-0.21569	-0.355439	-0.462004	-0.236881	-0.0874538	0.0456433	-0.511427	0.576768	-0.0585203	-0.235695	-0.466185	-0.308989	0	0.30049	-0.267312	0.528223	0.054399	0.671135	0.191462	-0.279483	0.15695	0.255284	-0.127205	0.062161	-0.167019
XIAP	-0.0853806	-0.0620151	-0.276711	-0.0487165	0.359961	-0.315779	0.210543	0.478192	0.232978	0.501829	0.183658	0.253277	0.209465	0.100549	-0.584987	0.0263286	-0.0511107	-0.16051	0.334193	-0.234491	-0.0227795	-0.0483012	-0.541227	-0.0309224	0.0394478	-0.285847	-0.329612	-0.197839	-0.342297	-0.233116	-0.83584	0.0609136	-0.0370049	-0.305518	-0.152033	-0.310318	0.247879	0.259661	0.214727	0.136518	0.367821	0.233251	0.322563	0.0446281	-0.00731134	-0.0911875	-0.0222058	-0.222987	-0.213247
BIRC5	-0.170507	0.175314	-0.0364432	-0.0130577	-0.0126314	0.12219	-0.122005	-0.133428	-0.0274658	-0.253963	-0.0765405	-0.075222	-0.0516109	0.0377307	0.201082	0.0697594	-0.0003	0.000847	-0.152023	0.103373	0.0437331	0.127944	0.728028	0.0813231	0.161796	-0.00270414	-0.0569868	0.216815	0.366511	0.405075	0.269325	0.00294399	0.0938406	0.038209	-0.204281	-0.0373363	-0.26238	-0.0703278	0.120524	-0.0732207	0	0.0847645	-0.0675592	0.168325	0.121475	-0.139651	0.0658712	0.127447	0.0529184
APLP1	-0.0198159	0.312829	0.164869	0.0819917	-0.0339737	0.287777	0.065896	0.0273123	0.192283	-0.266575	-0.159043	-0.145208	-0.185229	-0.114513	0.0523543	-0.0618215	-0.224207	-0.0330477	-0.0713701	0.0265002	-0.0706472	0.207154	0.360209	0.10219	0.181959	0	-0.0630903	-0.0628853	0.116473	0.136086	0.252789	0.151617	0.0735817	0.175039	-0.0909529	0.0456791	-0.213319	-0.0112147	0.20914	-0.110068	0.0248008	-0.125654	0.157207	0.0697823	-0.106204	-0.227221	-0.0791836	-0.0780177	0.0431151
APLP2	0.00430012	-0.0354605	0.0224609	-0.133605	0.127771	-0.134462	0.127988	0.0807476	0.0975809	0.205096	0.20354	0.0250998	-0.00335121	-0.109751	-0.110355	-0.116673	-0.183507	0.121664	0.0582676	-0.216218	-0.00730801	-0.557729	-0.745684	-0.171367	-0.293814	-0.00765133	-0.202007	-0.137625	-0.109331	-0.315956	-0.499634	-0.287781	-0.421372	-0.197395	0.0243473	-0.0119276	0.20761	0.0635004	0.0994053	0.0432606	0.148663	0.0169592	0.201142	0.00426865	0.0121193	-0.00249958	-0.332189	-0.443109	-0.193849
APOA1	-0.0252962	0.3114	-0.184922	-0.137034	0.162506	0.121484	0.0835266	0.0611124	0.0957861	0.0013361	0.222278	-0.0697479	-0.48227	-0.554831	-0.290224	-0.251612	-0.287289	-0.468483	0.292669	-0.0784321	-0.0833082	-0.308906	-0.182317	-0.0536375	-0.144095	0.324317	-0.0333261	0.0705585	-0.033371	-0.304435	-0.173217	0.166426	-0.0911245	0.259493	0.118504	0.0671864	0.259247	0.0476904	0.0284185	0.162989	0.258003	0.207499	0.363921	-0.0267725	0.0826864	-0.0258961	0	-0.365218	0.0494452
APOA2	0.0818262	-0.0721283	-0.265805	-0.0154676	0.254253	0.0445023	0.0164289	0.0573883	0.0555429	-0.14109	0.131112	0.0619221	0.0166187	-0.190202	-0.236676	-0.0203171	-0.0765142	-0.111269	0.0461159	-0.0782757	-0.025753	-0.259617	-0.276663	-0.0185623	-0.0336905	0.105629	0.0718861	0.0338831	-0.146728	-0.147973	-0.328671	0.0737982	-0.02983	0.20486	0.0952043	-0.00956821	0.10496	0.16202	-0.00936413	0.130206	-0.0178633	-0.112577	0.0923271	-0.0473585	-0.175227	-0.0421095	0.0500822	-0.309038	-0.00389481
APOA4	-0.110057	0.202066	1.29748	1.05111	0.246064	0.123039	0.2948	0.179239	0.154696	0.593938	-0.398516	-0.206087	-0.85908	-0.440114	0.105906	0.0223093	0.539481	0.196029	0.208049	0.00193691	0.384523	-0.307051	-0.334377	0.230209	0.142013	-0.153965	-0.0614085	0.0090642	-0.881375	-0.601562	-0.352589	0.293725	-0.0925446	0.677584	0.25486	0.504029	0.414891	-0.248065	0.653644	-0.213878	0.654666	0.171108	-0.281769	0.164401	0.994956	-0.538618	0.123088	-0.226736	-0.603093
APOB	0.0565176	0.0458164	-0.116302	-0.0930519	0.0514956	0.0238228	0.0761709	0.11674	0.0138388	0.146511	0.137186	0.0714292	0.0453625	-0.0280542	0.0438252	0.0258446	0.039691	0.0854425	-0.0146379	-0.145372	0.0107307	-0.37337	-0.496143	-0.186149	-0.143027	-0.0412741	-0.171141	-0.142684	-0.21058	-0.313332	-0.594079	0.00315189	-0.214738	0.000147	0.108548	-0.103009	0.0501003	0.122673	0.135305	-0.00934601	0.0688181	0.0697851	0.11494	-0.0257406	-0.0548668	-0.0380783	-0.211761	-0.396738	-0.274079
APOBEC1	0.0514359	-0.0295463	0.00499392	0.0425181	-0.0188823	0.110316	-0.00943088	-0.0432019	-0.128955	-0.124062	-0.0952511	0.134166	-0.0419021	0.0479126	-0.0981507	-0.0029006	-0.0944109	-0.0183854	-0.0200853	-0.0770736	0.0199432	0.0851121	-0.109099	-0.0256948	0.109342	-0.0667491	0.17642	0.200654	-0.0740914	0.0528603	0.153019	0.147898	0.127919	-0.0894546	0.210881	0.159085	0.0484486	-0.0160699	-0.134758	0.0972018	0.0267401	0.0516987	-0.0965438	-0.0881357	-0.0294642	0.148063	-0.0756884	-0.071744	-0.0286093
APOC1	0.0737286	-0.058383	0.0263519	-0.050004	0.231831	0.127297	-0.0145407	0.372468	-0.0211134	-0.15177	0.258115	-0.108058	-0.533604	-0.731187	-0.655918	-0.535962	-0.507985	-0.905278	0.015316	-0.153156	0.0794315	-0.291368	-0.193105	0.0839996	0.0531921	0.0998402	-0.0320721	-0.0680761	-0.512412	-0.369356	-0.675122	0.122504	-0.093297	0.200097	0.0888214	0.0817614	0.0688267	0.0251026	-0.169254	-0.0572767	-0.0380325	-0.0927916	0.121353	0.127297	-0.0855551	0.0547705	0.135249	-0.090004	0.131225
AQP8	0.236522	0.214697	0.0800476	0.0532317	-0.157754	0.0222139	-0.163408	0.129613	-0.195559	-0.0875106	-0.221677	-0.0599194	-0.17704	-0.0592365	0.113956	0.0125794	0.17316	-0.115346	-0.0900645	0.0496044	-0.233201	0.10263	0.0792432	-0.0972371	0.218965	-0.12684	0.248837	0.303139	0.399966	0.353923	0.350554	0.00517654	0.169553	0.0499816	-0.0121422	0.300317	-0.0622144	-0.220648	-0.0305634	0.0917478	0.120461	-0.18815	-0.313739	0.131876	0.0588741	-0.0176406	-0.170749	-0.0166845	-0.0217857
APOC3	0.288792	0.391684	-0.173335	0.143629	-0.0672684	0.04352	-0.0804577	0.039197	-0.106764	-0.334643	-0.20379	-0.212251	-0.464113	-0.280201	-0.00156975	-0.281175	-0.108401	-0.17451	-0.21256	-0.110579	0.169725	-0.302406	0.0263834	0.214664	0.0556784	0.394441	0.243986	0.217818	0.0893488	0	-0.269473	0.329457	0.168857	0.388303	0.381705	0.126184	-0.151279	-0.0236807	-0.115638	0.00150108	0.101594	-0.281108	-0.00993919	0.143666	0.176403	0.355222	0.187864	-0.0281963	0.155623
APOD	-0.272583	0.0409422	-0.111941	0.0690627	-0.177019	-0.0591254	0.0617967	0.00775385	0.155756	-0.0112133	0.0161576	-0.141985	0.41285	0.594561	0.115584	0.443478	0.432568	-0.0982513	-0.230206	0.077951	0.374122	-0.30491	0.234699	0.111007	0.373339	0.163794	-0.0786118	0.34272	0.420946	0.171793	0.0293994	0.918108	0.173973	-0.0152898	-0.148683	-0.172767	-0.206084	5.44e-05	0.0426517	-0.122075	0.341794	0.0692878	0.56767	-0.00526667	-0.172412	0.311898	-0.149356	0.165015	0.608857
APOE	0.149687	0.364457	-0.440415	0.110879	0.0639668	0.0918112	0.111314	0.145355	0.109659	-0.129333	-0.196722	-0.146012	-0.282891	-0.435893	-0.0622978	-0.251844	-0.296319	-0.293146	-0.0680885	-0.0783091	0.231003	-0.605843	-0.276493	0.332314	-0.325351	0.411306	0.253451	0.307682	0.274995	-0.123485	-0.325459	0.0944157	0.0115147	0.329628	0.29407	0.392882	0.308732	0.293846	-0.0483713	-0.116243	0.32883	-0.102688	0.336005	0.328281	0.034853	0.297315	-0.133844	-0.508781	0.319242
APOH	0.0584288	0.053935	-0.0511971	0.00156116	0.204505	0.0340967	0.0709982	0.179638	0.126204	0.143762	0.151863	0.0928059	-0.0357933	-0.145839	-0.20442	-0.113075	-0.268062	-0.0200424	0.179994	-0.148837	-0.00363636	-0.235113	-0.362887	-0.312976	-0.0726318	-0.15688	-0.210651	-0.556343	-0.293971	-0.378713	-0.715835	-0.092432	-0.186668	-0.087883	-0.0723362	-0.057169	0.127717	0.0881538	0.0826836	0.108529	-0.0158806	0.152207	0.0839767	-0.0165777	-0.267741	0	-0.0333405	-0.257892	-0.339683
APP	-0.10601	0.159452	-0.26362	-0.151469	0.251698	0.116046	-0.0386038	0.0717659	0.0737982	0.371728	0.331167	0.15133	0.103745	0.0170774	-0.242639	-0.0965338	0.0817318	-0.0276508	0.168692	-0.121382	0.0359077	-0.482101	-0.481774	-0.30044	-0.186058	-0.00142193	-0.146945	-0.128421	-0.198901	-0.37122	-0.787966	-0.102557	-0.438785	-0.246652	0.13463	-0.114909	0.296869	0.236609	0.142074	0.166937	0.263103	0.168213	0.235033	-0.143237	-0.0861158	0.0367479	-0.317464	-0.385747	-0.0214977
APRT	0.114503	0.33442	-0.0140171	0.244385	-0.0118985	-0.0566807	0.0118208	-0.108819	-0.10393	-0.137323	-0.172728	-0.109176	-0.116001	-0.0591717	-0.0880022	0.0398574	-0.467931	-0.223269	-0.112355	-0.172722	0.109188	-0.163466	-0.298962	0.0969834	0.0376129	-0.0346518	0.204372	0.162129	0.146634	0.140311	-0.392113	0.315523	-0.156497	0.351004	0.346033	0.122689	-0.143492	0.0201178	-0.0767241	-0.100518	-0.112611	-0.0537443	-0.0229678	0.156061	0.0148296	0.0447507	0.113568	-0.0221362	0.194307
KLK3	0.00567102	0.190228	0.0464559	-0.0962477	0.0438199	0.100192	0.0427322	-0.0845723	-0.0547104	-0.0527473	-0.221541	0.0426536	-0.12767	0.206601	-0.102427	-0.0535164	-0.0366449	0.100029	-0.0310931	-0.108276	-0.241626	0.184065	0.302905	0.0537839	-0.173601	-0.203961	0.0464215	0.293159	-0.0561275	0.1383	0.131905	-0.0714436	-0.110096	0.0435424	-0.179296	0.0370932	0.00798941	0.304491	0.0775151	0.153194	0.0349054	0.0503149	0.0594964	0.225485	0.151578	-0.240239	-0.023499	-0.129142	0.130621
FAS	-0.00286245	-0.366572	-0.410829	-0.092875	0.339744	-0.607834	0.135086	0.41669	0.0502305	0.102613	0.244922	0.0254283	0.245216	-0.0708551	-0.354147	0.111396	-0.0815434	0.0267673	0.290856	-0.342376	-0.14671	0.0450478	-0.4308	-0.104883	-0.123451	-0.238934	-0.210011	-0.429752	-0.494554	-0.18264	-0.380826	-0.317064	-0.00626516	-0.115646	-0.299698	0.278708	0.186804	-0.0603027	0.0835371	0.277466	0	-0.253468	0.0148797	-0.269161	-0.283664	-0.070817	-0.156258	-0.180061	-0.303274
FASLG	0.0790229	0.201748	-0.0911531	-0.0549502	0.0756888	0.148635	-0.0408306	0.0476565	0.0170622	0.209288	0.218689	-0.0118499	0.149631	0.326605	-0.0171704	0.155081	-0.0325756	0.310138	0.0504508	0.00570011	-0.000403	-0.00259543	0.0420113	0.0167947	-0.0356736	0.116065	-0.00088	0.152188	0.193395	-0.134147	0.323271	-0.109137	-0.0843396	-0.00245285	-0.0438609	-0.00429678	0.0123734	0.217103	0.0787692	-0.00553942	0.188228	0.0838728	-0.056891	0.0576744	-0.0332093	-0.191764	-0.0724487	-0.0502148	0.107828
SHROOM2	-0.137588	0.280535	0.0576162	0.00976086	-0.170882	0.264013	-0.0928802	-0.202415	-0.204534	-0.380498	-0.232199	-0.104328	0.183127	-0.00486231	0	0.0321736	0.23639	0.222788	-0.217494	-0.085474	0.071732	0.0898252	0.209941	0.00825024	0.220948	0.1872	-0.0715818	-0.108431	0.196392	0.167158	0.13585	0.0655241	-0.123781	0.23791	0.215046	-0.0894179	-0.238008	-0.0956225	-0.0706162	-0.216714	-0.194638	-0.169251	-0.0418639	0.0428739	-0.244397	0.111735	-0.135624	0.208344	0.192349
AQP1	-0.245133	-0.197875	-0.448578	-0.0331545	-0.0407777	0.0529628	-0.159374	0.0544734	-0.174453	0.39489	-0.1324	0.104423	-0.125503	0.245584	0.0959787	0.030899	-0.0285702	-0.276807	0.136776	0.569338	0.0408049	0.199578	0.164058	0.323755	0.563357	-0.0827003	-0.0150828	0.426795	0.354611	0.67203	0.0677743	-0.0164366	0.0192146	-0.20735	-0.4275	-0.460979	-0.188139	0.321298	-0.311591	-0.276871	0.375137	0.123928	0.130018	-0.0224133	0.0802202	0.437867	-0.0738425	-0.0443692	0.562745
AQP2	0.298581	0.0270085	0.0784245	-0.0887885	-0.0374112	0.397054	0.210048	-0.199463	0.0710182	-0.164504	-0.0542831	0.0273175	-0.363281	-0.203882	-0.102312	-0.0940762	-0.239002	0.0851483	-0.0776172	0.0617714	-0.288023	0.276136	-0.163907	0.0341802	0.135389	-0.00315857	0.0433497	0.207384	0.112886	0.251142	0.0953121	0.125187	0.361014	0.0646205	-0.0206623	0.213787	0.196855	-0.128542	-0.0885572	-0.0275578	-0.0812101	0.0490251	-0.0139761	-0.163433	-0.164076	-0.0947824	-0.064414	0.14142	0.0969577
AQP3	0.434831	0.116684	0.675513	0.145357	-0.167751	-0.401011	-0.534994	-0.225622	-0.144649	-0.285804	-0.504096	-0.339861	0.172801	0.410776	0.193058	0.731098	0.224077	-0.089242	-0.311458	-0.0803175	0.485484	-0.208429	0.199416	0.517942	-0.107346	0.261485	0.110614	0.155091	0.335767	-0.0181761	0.188321	-0.104077	-0.0857429	0.108749	-0.286629	0.263963	-0.595825	-0.0543242	-0.155245	-0.136466	-0.566624	-0.382871	-0.450479	0.139412	0.23658	-0.189255	0.52006	-0.19432	0.297225
AQP4	0.111529	0.0966139	-0.00227785	0.038568	-0.0160575	0.210159	-0.0731773	-0.0204301	0.151051	0.205128	0.113627	0.0950737	-0.0678806	0.0449133	-0.154212	-0.0589128	-0.10053	-0.179805	-0.112194	0.0326519	0.0185499	-0.116151	-0.0666828	-0.142152	-0.162086	-0.239979	-0.116287	0.0500731	-0.142858	0.0076704	-0.131017	0.113871	-0.0186405	-0.135183	0.11221	0.0392356	-0.0557871	-0.080513	0.118631	0.048975	0.248113	0.104784	0	-0.060009	-0.131722	-0.0247836	-0.0717273	-0.0921769	-0.171594
AQP5	-0.033042	0.173129	0.146478	0.101331	-0.163163	0.23711	-0.173311	-0.18891	-0.087606	-0.145086	-0.155629	-0.387097	-0.183502	-0.0898819	-0.0628486	0.102019	0.126205	0.419847	-0.361373	0.170932	-0.0772576	-0.00870991	0.359641	0.151767	-0.0633273	0.0854902	0.16546	0.140654	0.361594	0.142825	0.504302	0.174345	0.44753	0.133891	0.287595	0.269914	-0.291914	-0.0382566	-0.204481	-0.183417	0.00630903	-0.169989	-0.34024	0.106842	0.143103	0.18098	-0.115574	-0.00270319	0.187531
AQP6	-0.0818701	0.280078	-0.0837479	0.037118	0.0418129	0.299696	-0.018775	-0.00161648	0.0558581	-0.15884	-0.104747	-0.0992651	-0.000122	-0.234143	0.164946	-0.008883	0.110133	0.0311551	-0.0574608	-0.00257063	-0.0884099	0.0563731	0.258866	-0.0235972	-0.037859	0.0827408	0.199437	0.0922899	0.194294	0.0677762	0.0623631	0.0437746	0.0726895	0.0970216	-0.0772753	0.05194	-0.0219197	0.0736094	0.0801754	0	0.0801935	0.0919476	0.0555015	-0.0154858	-0.0407543	-0.00554609	0.020534	-0.0426116	0.196988
AQP7	0.0945983	-0.192853	-0.109398	-0.0638843	0.0204058	-0.000426	0.0956063	-0.154817	-0.0451946	-0.278157	-0.126923	-0.473395	-0.05231	0.0707035	0.432488	0.0627627	0.39656	-0.301436	-0.146903	0.166756	0.0964894	-0.335499	0.0417805	0.270136	0.19376	0.0503497	-0.00648928	0.344289	0.537505	0.263793	0.317959	0.29704	0.0852037	-0.119842	0.124587	0.0466247	-0.293511	0.136126	-0.0229321	-0.138622	-0.307321	-0.300246	-0.269707	0.231152	-0.0637174	0.0168138	0.0151286	0.0586476	0.128845
AQP9	0.144535	-0.112609	-0.221225	-0.362145	0.477184	0.673763	0.230652	0.138726	-0.0258179	0.112218	0.0571499	-0.0314789	0.451966	0.103889	0.172083	0.320642	-0.0832844	0.388363	0.281875	-0.313411	-0.0151377	-0.359374	-0.761526	-0.453596	0.06458	-0.0474157	-0.410274	0.0326939	-0.378635	-0.669744	-0.761791	0.0470619	0.0290766	-0.0475025	-0.108685	-0.213317	0.248034	0.207697	0.18201	0.114068	0.229472	0.226053	0.376517	-0.166902	0.164697	0.212518	-0.138053	0.213993	-0.204437
AR	-0.117651	0.0748158	0.200046	0.0293846	-0.217749	0.553953	-0.0705967	-0.285447	0.108177	0.154465	-0.0191441	0.0180397	0.489601	0.527226	0.834158	0.353641	0.439316	0.662138	-0.152331	0	0.303876	-0.113565	0.181627	-0.0981607	-0.0408401	0.483858	0.278822	0.0648727	0.316157	-0.134469	0.0918884	0.334525	-0.0184002	-0.361988	-0.153894	-0.160986	-0.0955715	0.0269346	0.138063	-0.180471	0.0707483	0.0176601	-0.0750341	0.502624	0.0815144	0.514612	-0.0200806	0.262103	-0.0253019
ABCC6	0.508081	0.210507	0.028203	0.0377512	-0.179522	-0.122833	-0.335555	-0.40494	-0.258698	-0.30033	-0.023222	0.0206814	0.389626	-0.118446	0.453597	0.435161	0.378235	0.29332	-0.106441	0	0.236567	-0.240176	-0.245562	0.367019	0.0959396	0.661393	-0.0183277	0.268679	0.191514	0.319137	0.134737	0.0293818	-0.236238	0.178681	0.309015	0.344623	-0.0571861	0.0147152	-0.0157595	-0.171517	-0.0516682	-0.264659	-0.27647	0.00872612	0.0394449	0.114899	0.435877	-0.0930262	0.390617
ARAF	-0.0415831	0.233369	0.0346661	0.0227165	-0.241326	-0.215977	-0.156321	-0.42133	-0.495625	-0.243929	-0.319572	-0.404447	0.582904	0.537093	0.66663	0.463545	0.611429	0.581283	-0.311029	-0.0341072	0.436459	-0.280215	-0.271561	0.183266	-0.0420637	0.143583	0.0118742	0.0761013	0.0885181	0.025404	-0.365491	0.109318	-0.281645	0.20425	-0.00786209	0.0129251	-0.226862	-0.0743313	-0.308581	-0.264332	-0.145168	-0.482755	-0.362376	0.107381	0.112753	0.0545235	0.208895	-0.145103	0.0497379
ARCN1	-0.175732	-0.278908	-0.280367	-0.0249968	0.270235	-0.15249	0.264286	0.156928	-0.17814	0.375266	0.159431	0.294726	0.126838	0.135629	-0.222767	0.0880146	0.194831	0.296776	0.257599	-0.148473	0.0699673	-0.460642	-0.341113	-0.215505	-0.294489	-0.169639	-0.100132	-0.311643	-0.560508	-0.499668	-0.817775	-0.158572	-0.218151	-0.535414	-0.520813	-0.0778656	0.315816	0.120774	0.165703	0.224444	0.199633	0.0246172	0.10362	-0.0780525	0.221986	-0.182124	0.0951195	-0.428508	-0.454117
TRIM23	0.139571	-0.397738	0.0653629	-0.0634665	0.514959	-0.690287	0.115102	0.170257	0.121737	0.522815	0.451139	0.409808	0.0203896	-0.118438	-0.471597	-0.427247	-0.105981	-0.0782399	0.462874	-0.200451	0.036345	-0.122677	-0.573437	-0.123536	0.0230098	-0.495534	-0.389547	-0.170477	-0.296128	-0.225991	-0.417723	-0.430761	-0.230465	-0.315634	-0.135673	0.261271	0.338054	0.260169	0.168887	0.348714	0.339482	0.0632401	0.292574	-0.115937	0.307629	-0.0726342	0.0329161	0.0231376	-0.667884
AREG	0.106623	0.218347	0.0727015	-0.0101371	-0.0671096	-0.00193214	0.174413	-0.00964689	0.321213	0.00619125	0.00271893	-0.0335522	0.0657029	0.628387	0.102853	0.0485291	-0.146838	0.0816121	-0.139995	0.00105333	-0.122417	-0.0452886	-0.044868	-0.0804725	-0.000603	-0.101328	0.03546	-0.0324268	-0.0382805	0.0574579	0.0118842	-0.0766668	0.0193443	0.071135	0.0286956	-0.102852	-0.088201	-0.0251412	-0.01441	0.104594	-0.108791	0.0219102	-0.0401154	-0.0569782	-0.184033	0.0459771	-0.0480676	-0.0892563	-0.0282283
ARF1	-0.105719	0.038435	-0.189293	-0.0644398	0.240419	-0.0995398	0.143297	0.0179138	-0.037714	-0.0078249	0.0577288	-0.0206347	-0.00128174	-0.121637	-0.147331	0.0108242	-0.113515	0.0253754	0.0691862	-0.19994	0.0257082	-0.434614	-0.53161	0.0169029	-0.160173	-0.114854	-0.122263	-0.00889873	-0.225258	-0.2424	-0.494846	-0.0241289	-0.16336	0.020833	-0.117203	0.0814581	0.116694	0.219752	0.101696	0.115218	0.226969	-0.0339546	0.17647	-0.0256863	0.0634441	-0.210479	-0.0836296	-0.320201	-0.237132
ARF3	0.0400066	-0.210544	-0.127917	0.0943155	0.276795	-0.0486631	0.195168	0.371513	-0.078227	0.387951	0.232587	0.137149	-0.102849	-0.191967	0.0196476	0.0748577	0.132039	-0.140937	0.0631905	0.0631189	0.0694628	-0.278121	-0.281353	-0.217443	-0.0957527	0.029418	-0.0665035	-0.0498648	-0.380075	-0.34379	-0.386133	-0.307729	-0.159328	-0.00539303	-0.221748	0.0750341	0.310778	0.223372	0.0465851	0.240495	0.0618792	0.117226	0.169305	-0.120156	0.104188	-0.0545149	-0.084506	-0.284203	-0.0467997
ARF4	-0.0491858	-0.575284	-0.336884	0.257548	0.2732	-0.537413	-0.138412	0.0155144	-0.367413	0.414668	-0.00526333	-0.100923	0.298955	-0.205958	-0.260688	0.0697527	0.0830374	0	0.354874	-0.201751	-0.0423717	-0.409543	-0.910119	-0.304229	-0.168314	-1.11056	-0.493304	-0.449118	-1.06198	-0.34862	-1.00879	-0.496935	-0.116808	-0.408237	-0.656631	0.262549	0.323818	-0.0120077	-0.0759926	0.190211	0.207641	-0.249366	0.0324593	0.00850487	0.484036	-0.619901	0.294669	-0.521731	-1.32594
ARL4D	-0.334935	-0.673686	-0.0457296	0.254789	-0.262294	-0.921762	-0.730431	-0.533829	-0.117408	0.548175	0.0703278	-0.107751	0.0652647	-0.663508	0.851301	-0.319014	-0.0678925	-0.479671	0.316966	0	0.279089	-0.0494299	-0.236269	-0.0449953	0.129891	0.26238	0.560094	0.284421	-0.206108	0.191589	-0.130879	-0.566002	-0.152619	-0.72796	0.0117264	0.2166	-0.2522	0.0259018	0.294402	-0.457483	0.09058	-0.573181	-0.184206	0.245097	0.19157	0.0618091	0.304368	-0.00694752	-0.318866
ARF5	-0.0458436	0.190696	-0.187398	-0.0206847	-0.0832438	0.113424	0.0425324	0.0854235	-0.0501757	-0.276372	-0.202739	-0.117861	-0.153447	-0.128448	0.0681419	-0.00300312	0.252106	-3.29e-05	-0.374949	0.0206838	-0.02141	-0.0459766	0.0744424	-0.0469055	-0.104015	0.195891	0.154636	0.0385494	0.198455	-0.118236	0.0576029	0.320508	0.167188	0.0786343	0.230391	0.0198956	-0.174471	-0.168447	-0.18381	-0.106552	-0.0481629	0	0.0545836	0.055357	0.189406	0.0750351	-0.213022	-0.0735908	0.285101
ARF6	0.0209322	-0.585918	0.0745392	0.0376959	0.0587149	-0.0405445	0.0341473	-0.295236	-0.173739	-0.338325	-0.224293	-0.0121937	-0.125085	-0.139667	0.299907	0.0964794	0.0290213	0.270883	-0.0348692	0.103164	0.00780487	-0.128688	-0.309587	-0.0336752	-0.0637274	-0.0710287	0.068265	0.21697	0.0503321	0.259275	-0.0437384	0.191056	-0.3582	-0.2109	-0.113988	0.00828743	0.0523329	-0.0599709	-0.0059967	-0.0685654	-0.255922	-0.0383234	-0.0685415	0.0269251	-0.130625	-0.166545	-0.160396	-0.0117836	0.013484
ARG1	0.0624647	-0.0284081	-0.201094	-0.0261421	0.431492	0.016468	0.240943	0.347364	0.313263	0.564216	0.337693	0.169531	-0.0543318	-0.110536	-0.0852327	-0.367234	-0.267631	0.00589561	0.272996	-0.4643	-0.180327	-0.747065	-0.770569	-0.0635967	-0.293658	-0.614424	-0.423995	-0.776815	-0.571741	-0.658137	-1.28175	-0.311567	-0.181995	-0.0370779	0.00719452	-0.150116	0.496646	0.0302143	0.119034	0.0146742	-0.0842934	0.219958	0.20735	0.0071888	-0.246541	-0.16213	-0.321954	-0.532351	-0.90871
ARG2	-0.222554	0.0060277	-0.00779724	0.0737615	-0.129508	0.470363	0.0673447	0.133937	-0.0073781	-0.0438004	0.0444679	0.0541892	0.217522	0.000331	-0.00474787	0.0137644	0.231849	-0.114672	0.083117	0.0583463	-0.0210276	-0.0223193	-0.0177083	-0.040925	-0.158257	-0.0496931	0.0486212	0.217663	0.0905099	0.132247	-0.141236	0.0251431	-0.108262	0.0472198	0.00165701	-0.0946927	0.0515437	0.0308571	0.237464	0.254169	0.0707116	-0.0415497	-0.0946355	-0.10504	-0.00216436	0.132653	-0.061367	-0.121628	0.00913334
RHOA	0.0483532	0.332934	-0.0288944	-0.00475407	0.0753994	0.1319	0.0896444	0.0537577	-0.180368	0.00989151	-0.00468254	0.0119858	0.0177307	-0.012804	0.0758457	-0.0871353	0.1649	0.149176	0.0448484	-0.201977	0.00182533	-0.329092	-0.369344	-0.165972	-0.142323	-0.112535	-0.217495	-0.16409	-0.108112	-0.270575	-0.401161	-0.0408888	-0.249478	0.20931	-0.116903	-0.0921593	0.0409183	0.0747414	-0.0908413	0.0285368	0.19644	0.201976	0.0737171	-0.092927	-0.0299063	0.0315266	-0.0887794	-0.24064	-0.264585
RHOB	-0.353742	0.823784	0.87872	-0.608502	-0.129016	0.11926	0.774475	-0.0559006	-0.617915	-0.475456	-0.234901	-0.318865	-0.0130119	1.03323	0.108745	0.305963	0.236918	0.935739	-0.122931	-0.354623	0.0215149	-0.448777	-1.0571	0.013339	-0.306976	-0.379727	0.00160885	-0.377084	0.387215	-0.339927	-0.522945	0.749925	-0.62093	0.264823	-1.12959	-0.00864124	0.908233	0.147882	-0.495279	0.46963	-0.291914	0.596128	-0.245718	-0.153697	0.117308	0.786214	-0.272418	-0.649572	0.285876
RHOC	0.259863	0.0916471	0.429501	0.105475	-0.0676537	0.035141	-0.0143385	0.0443811	-0.0125723	-0.256456	-0.227759	-0.293654	-0.0113564	-0.0229044	-0.381364	-0.253834	-0.000921	-0.169879	-0.0455122	0.0501242	0.0419741	0.0458889	-0.0603514	0.119077	0.00850201	-0.00574875	0.195189	0.132184	0.0110416	-0.0719452	0.0730858	0.0641317	-0.0645294	0.0834732	0.168577	0.3113	-0.185299	0.012064	0.174051	0.0333242	-0.100197	0.0143156	0	0.219924	0.163542	0.144616	0.135509	0.020855	0.315857
RND3	-0.3433	0.0665779	0.224577	-0.0424681	0.711382	-0.193368	0.200012	0.620139	0.0100012	0.0898333	0.45902	0.777011	-0.472933	0.485756	-0.248216	-0.403258	-0.251543	-0.155541	0.449217	-0.48763	-0.0771303	-0.440873	-0.669515	-0.0872612	-0.361224	-0.874139	0.0108833	-0.624678	-0.472036	0.225149	-0.541389	-0.170933	-0.270443	-0.00106811	-0.956486	-0.0326357	0.267625	0.316978	0.419142	0.347024	0.434657	0.427676	0.286585	-0.288887	-0.111467	-0.102881	-0.501791	-0.444235	-0.718028
RHOG	-0.167527	0.285237	-0.235232	0.0750165	-0.00681353	0.0261669	-0.189573	0.115382	-0.0115471	-0.0999999	-0.136086	-0.140527	0.264359	0.37578	0.312571	0.469158	0.514864	0.253109	-0.113388	-0.0561814	-0.220992	-0.115211	0.14363	0.0986662	-0.124822	0.15849	-0.00784445	0.129669	0.141716	-0.0222406	0	-0.0684614	-0.0444932	0.0453124	-0.0379062	-0.0262308	-0.161403	0.00942612	-0.159741	0.047472	0.00508594	0.116692	-0.0583663	-0.0518737	0.356188	0.10543	0.0583668	0.0192928	0.089211
ARHGAP1	-0.220303	-0.152537	-0.13983	0	-0.00726557	-0.263688	-0.0998421	-0.274577	-0.352104	-0.36136	-0.447185	-0.516293	0.175497	0.355418	0.0212541	0.162372	0.0071888	0.151476	-0.122945	0.0708866	0.263515	0.174027	0.034265	-0.0635986	0.0638452	0.434959	0.0108581	0.17972	0.306254	-0.0615983	0.0300646	0.125356	-0.139782	0.124004	-0.0420651	-0.150284	-0.150362	0.159899	-0.153357	-0.266005	-0.0845208	-0.238727	-0.449258	0.0707664	-0.180901	0.0921621	0.155159	-0.0884991	0.315374
ARHGAP4	0.00213957	0.190707	0.0118718	-0.0448327	-0.28341	-0.429624	-0.266718	-0.0641537	-0.286788	-0.250131	-0.403605	-0.226651	-0.0876656	-0.17135	0.144897	0.203892	-0.137362	-0.463902	-0.0511761	0.0490131	0.238671	0.441236	-0.370502	0.0577278	0.314919	0.215401	0.147961	0.217152	0.247153	-0.00302219	0.240129	-0.0430093	0.254023	0.18683	0.220021	0.0705886	-0.266014	-0.324261	0.00407028	-0.0992994	-0.279113	-0.1393	-0.194788	0.123917	0.120902	0.375879	0.103694	0.198965	0.325173
ARHGAP5	-0.0348196	-0.307524	-0.00740862	-0.109626	0.218707	-0.259311	0.238164	0.186912	0.251148	0.409652	0.350142	0.334744	0.231269	-0.158022	-0.0544157	-0.0344291	-0.0336952	-0.0638256	0.309442	-0.101876	-0.0585051	-0.180249	-0.488219	0.0279903	-0.10084	-0.516143	-0.228714	-0.305991	-0.25031	-0.240057	-0.475245	-0.189437	0.0764217	-0.039969	0.258473	-0.126229	0.132666	0.253194	0	0.14317	-0.0746923	0.131465	0.284421	-0.00337696	-0.0431643	0.0368938	-0.113567	-0.0700378	-0.506148
ARHGAP6	-0.0316138	0.143284	-0.0963812	0.035943	0.0313883	0.297059	0.170454	0.00358105	-0.046226	-0.0741148	-0.177517	-0.140139	0.179029	0.00128937	0	0.0991526	-0.0255628	-0.229487	-0.10505	-0.054574	0.000259	-0.148027	-0.000172	-0.184931	-0.158058	0.158313	-0.118862	0.0167704	-0.0219898	-0.0808063	-0.107271	0.120352	-0.0393867	0.0784922	-0.144845	-0.114046	-0.0297093	-0.0277085	-0.029645	0.089323	0.213435	-0.0145087	-0.292601	0.00965118	-0.0230694	0.292432	0.0154748	0.0576682	-0.22362
ARHGDIA	0.0173464	0.324942	0.104346	0.119746	-0.0225964	0.194985	-0.00926304	-0.0234594	-0.110388	-0.111335	-0.0686684	-0.0175457	0.579499	0.314621	0.480795	0.5115	0.490413	0.426796	-0.0520582	0.0914869	0.40089	-0.0397139	-0.0199184	0.0982733	-0.0275469	0.191082	0.11158	0.183533	-0.089674	0	0.133013	0.178281	0.107546	0.210296	0.0679894	0.220102	-0.205334	-0.143603	-0.227141	-0.173183	-0.0827646	-0.0525665	-0.056077	-0.0445452	0.326191	-0.0188923	0.144176	0.0383158	0.231084
ARHGDIB	-0.106862	-0.171626	0.197515	-0.160063	0.344994	-0.525806	-0.0448694	0.300339	0.135777	0.798482	0.122628	0.192165	0.0239058	0.23501	-0.7572	0.212911	-0.142206	-0.0854692	0.70767	-0.255676	0.0769234	0.066041	-0.606811	-0.303611	-0.269936	-0.390524	-0.366794	-0.204871	-0.997185	-0.660523	-0.839962	0.0475187	-0.129981	-0.160157	-0.249109	0	0.19196	0.244121	-0.0178661	0.368643	0.205626	0.295434	0.400154	-0.153028	-0.0776262	0.104528	0.104923	-0.555386	-0.218228
ARHGDIG	0.204053	0.0588407	0.0967908	0.274734	-0.186732	0.112763	-0.139428	0.0414839	0.115415	-0.170066	-0.303226	-0.159651	-0.325129	-0.166552	-0.504562	-0.227614	-0.254181	-0.263093	-0.074192	0.120087	-0.148958	0.0593071	0.510043	0.186016	0.227426	-0.126793	0.10186	0.185928	0.0377178	0.176581	0.410376	0.117385	0.303134	0.0961242	0.0869007	0.204455	-0.0842443	-0.252652	0.153417	-0.0620589	-0.128882	-0.0166607	0.121863	-0.0392432	-0.164754	-0.0434799	0.00739717	0.410198	0.151251
RHOH	0.108394	-0.0231347	-0.133147	0.00142717	-0.0365562	-0.136238	0.149815	0.106468	0.256491	0.278679	0.110857	-0.183631	-0.2175	0.116426	-0.146899	-0.0521812	-0.265773	-0.0420132	0.379871	-0.00529385	0.0433626	0.196234	-0.189003	0.211686	-0.0987897	-0.111146	-0.0948458	0.114462	0.127054	0.0999351	-0.190145	-0.091393	0.0164704	-0.0681882	-0.199377	-0.0163274	-0.0155768	0.0990834	-0.191807	-0.0118494	-0.205336	0.410906	-0.00310564	-0.0432081	-0.088984	0.423506	0.325134	0.158564	0.0477648
ARL1	-0.0175962	-0.364518	-0.0802836	0.211205	0.522772	-0.511085	0.154084	0.656006	0.160822	0.722402	0.583253	0.38616	-0.168116	-0.0794258	-0.364193	-0.106702	0.169095	-0.121957	0.574955	-0.0762854	0.0838227	-0.276158	-0.305339	-0.146401	-0.106735	-0.632847	-0.33364	-0.25598	-0.971318	-0.250932	-0.923882	-0.321778	-0.147847	-0.148036	-0.166025	0.315752	0.506593	-0.0278988	-0.0429792	0.540463	0.427085	0.429031	0.573445	-0.175941	0.141687	-0.524814	0.0682712	-0.630344	-0.61234
PHOX2A	0.00752354	0.232075	0.0271993	-0.0930543	-0.0747738	0.15418	0.0401735	0.179677	-0.0117383	-0.150356	-0.14611	0.0475745	-0.0228858	0.214288	-0.0412931	0.0472116	0.221743	0.0927601	-0.186329	-0.0925717	-0.0922384	0.288732	0.388758	-0.0178862	0.104829	-0.0733409	0.137598	0.457364	-0.0040741	0.213168	0.401401	0.0798316	0.123068	0.11612	0.117312	0.0262246	-0.150858	0.0693049	-0.0678072	0.00358105	0.0912886	-0.00679779	-0.0911593	-0.0840654	-0.104017	-0.230262	-0.0242867	0.285243	0.164275
ARL3	0.0471115	-0.246534	-0.0525346	-0.00816297	0.0689263	-0.137883	-0.0376363	-0.0428467	0.243853	0.1629	0.193704	-0.112294	-0.244025	-0.2419	-0.0435028	-0.267525	-0.0983915	0.00790978	0.107586	0.128213	0.389527	-0.165405	0.156078	0.110128	-0.00478554	0.0112057	-0.117884	-0.186132	-0.0139003	0.0435619	-0.0125499	0.0102201	-0.123455	-0.173158	-0.0104909	-0.00305223	0.210276	-0.182434	0.118092	-0.028183	0.0337682	0.0336943	0.0510941	0.250241	0.00429392	-0.154198	-0.0856452	0.0102577	-0.0523667
ARNT	-0.0829821	-0.0777607	-0.261313	-0.296082	0.139028	0.149373	0.241741	0.147535	-0.0388641	0.0921087	0.121634	0.186229	0.717159	0.363719	0.350669	0.481753	0.430056	0.407256	0.0661993	-0.086235	0.172541	-0.103184	-0.407039	0.0352955	-0.100959	0.252496	-0.111717	-0.192583	0.0294228	-0.128695	-0.446101	-0.104844	-0.25375	-0.0939646	-0.290412	-0.169771	-0.0673361	0.0925198	-0.0560665	-0.0157795	0.230129	-0.134941	0.0165462	-0.17502	-0.0897064	0.085432	0.00682163	-0.00841331	0.0830021
ARNTL	-0.682136	-0.37256	-0.185107	0.143212	-0.385163	0.630271	-0.294922	-0.862522	1.1681	1.46315	0.486262	-0.343223	-0.68311	-0.253081	1.23279	-0.568049	-0.0814085	-0.312596	-0.465197	-0.607313	-0.593442	-0.699464	0.0429187	-0.49808	0.475143	-0.102537	0.203332	0.0669451	0.0135345	-0.549945	0.326045	0.291017	-0.323224	-0.573529	1.56823	-0.818749	1.32257	0.30069	1.3671	-0.0276246	0.571022	-0.415573	0.248423	1.50871	0.216513	1.34653	-0.759383	-0.284875	-0.327155
ARR3	0.135433	0.179797	0.099894	0.0530534	0.070848	0.233011	-0.124888	-0.168901	0.0238719	-0.187612	-0.0473037	-0.0872221	0.0525851	-0.0642815	0.135641	0.00971413	0.0199399	0.220908	-0.114954	-0.0125346	-0.0411768	0.0994811	0.334147	0.00971413	0.0375495	-0.109019	-0.00768995	0.264948	0.0457306	0.196941	0.324513	-0.133391	0	0.15152	-0.0512319	-0.13969	-0.042933	-0.0410786	-0.0270643	-0.0443487	-0.0313821	0.138433	0.182844	-0.00803328	-0.120362	-0.0855727	0.16133	0.19623	0.0317669
ARRB1	-0.0885263	-0.107051	-0.114907	-0.0416536	0.117323	-0.304898	-0.146612	-0.155217	-0.0596433	0.0233479	0.000317	-0.0273609	0.0389109	0.024075	0.162766	0.0016222	0.0558476	0.11097	-0.0811915	0.183638	0.154224	-0.000347	0.0550942	0.0149379	-0.0406532	0.116452	0.151079	0.100844	0.384627	-0.0270109	-0.25811	0.186229	-0.149928	0.265661	0.00731993	-0.122576	-0.13601	0.0442967	-0.136312	0.025506	-0.121844	-0.113715	-0.00760174	0.0140753	0.0434794	0.314111	-0.133599	-0.0349035	0.270035
ARRB2	-0.221117	0.244469	-0.0400195	-0.218439	-0.210578	-0.14165	0.00708628	-0.365147	-0.157039	0.00476265	-0.264606	-0.447671	0.146394	0.0797153	0.181471	0.160244	-0.135054	-0.161443	-0.121995	0.278539	0.148254	0.127111	0.0139494	-0.00167084	-0.262553	0.101301	0.0165963	0.0853701	0.293236	-0.0904346	0.283918	0.133844	-0.048296	-0.257855	0.267869	-0.0740571	-0.199211	-0.136486	-0.199345	-0.227732	-0.307147	-0.310875	-0.394834	0.232327	0.0995431	0.255919	-0.0232682	0.107145	0.223907
ARSA	0.344784	0.365617	-0.0672269	0.215278	-0.128831	-0.45059	-0.365304	-0.208874	-0.312423	-0.278718	-0.552409	-0.677421	0.555751	0.308406	0.275961	0.153502	0.155238	0.272775	-0.306945	0.167211	0.192791	-0.107139	-0.295723	0.399134	0.0555854	0.418468	0.387034	0.194931	0.127732	0.202093	0.139384	0.0888057	0.0852976	0.256261	0.392164	0.296956	-0.210392	-0.343096	-0.127935	-0.289025	-0.431388	-0.268545	-0.25067	0.174505	0.139275	0.15703	-0.132475	0.456173	0.406769
ARSB	0.0250387	-0.0736651	0.537626	0.1773	-0.194624	0.522539	0.124994	0.6268	-0.417866	-0.300373	-0.463093	-0.342272	0.124583	0.147695	0.481226	0.844737	0.803059	0.303827	0.156162	0.00750542	-0.230892	-0.182835	-0.209085	0.0434461	-0.0116081	-0.250998	0	0.270787	-0.386918	-0.335193	-0.110854	0.192191	-0.346582	-0.369984	-0.263999	-0.101472	-0.344964	-0.0627308	0.0867171	-0.169334	-0.457233	-0.375689	0.0870042	0.0368752	-0.333873	0.139088	0.211968	-0.35242	0.599177
STS	0.366728	0.177276	-0.339217	-0.0568762	-0.0809598	0.256245	-0.0273633	0.0142255	-0.190818	-0.0303893	-0.0111494	-0.37322	0.238185	-0.0352855	0.548188	0.114806	0.181841	0.346912	-0.446904	0.00428724	0.35595	-0.0865107	-0.221936	0.0819736	0.0282888	-0.119853	0.371614	0.215993	0.414986	0.235923	-0.517671	0.181739	-0.112717	0.672731	-0.310006	0.22173	-0.569133	-0.0438094	-0.0278187	0.241465	0.0742116	0.134267	-0.2543	0.0392828	0.046782	0.547877	0.00428724	0.114527	-0.371375
ARSD	0.266291	0.436391	-0.785982	0.162253	0.224441	0.158059	0.0976229	-0.204244	0.315577	-0.0615168	-0.116684	-0.643151	0.554605	0.582987	0.42828	0.571601	0.419917	0.786612	-0.631414	-0.0537424	0.482834	-0.189965	-0.0394297	0.393511	0.231483	-0.0403748	0.282925	0.302226	0.547653	0.0754471	-0.223705	0.214549	-0.257858	0.24881	-0.621257	0.207302	-0.719667	0.211508	0.272784	-0.0312347	0.0927162	-0.276242	-0.162354	0.542823	0.104574	0.465575	-0.0144224	0.208424	-0.192656
ARSE	0.403038	0.00709343	-0.34721	0.0855837	0.673943	0.0188112	0.136142	0.166334	-0.356065	-0.238731	0.0873251	-0.541481	0.309519	0.411151	0.334419	0.370562	-0.406614	0.271734	-0.127072	-0.277617	0.102717	-0.177439	-0.179721	0.144949	-0.152422	-0.466764	0.167096	0.00451851	0.486843	0.122958	-0.930029	0.0118999	-3.21504	0.329427	-0.15968	0.145	-0.0500078	0.556315	0.15387	0.450923	0.306434	-0.686812	-0.613333	0.229509	-0.153538	0.0951176	-0.250344	0	-3.73052
ARSF	-0.206242	-0.00437355	-0.199215	-0.01057	0.420429	-0.15022	-0.117944	-0.189785	0.228437	-0.224113	-0.347379	-0.186059	0.213334	0.0327988	0.525957	0.0251136	0.252725	0.411481	-0.1508	0.116568	-0.153272	-0.00437355	0.00747538	0.318492	0.247081	-0.0722995	-0.163959	0.411854	0.165996	-0.069047	0.0764542	-0.172979	-0.086647	0.0169516	-0.0760517	-0.161401	0.290926	0.0844259	0.0213532	-0.0941238	0.169304	-0.0540829	-0.110939	-0.119398	0.00204372	0.0227585	0.244217	0.0192127	-0.381015
ART1	-0.0659528	0.404913	-0.0323596	-0.0248947	-0.00410986	0.45318	0.0343742	0.3617	0.347141	-0.217623	-0.00170088	-0.00503445	-0.262335	-0.223152	-0.0805278	0.267123	-0.105461	-0.0569262	0.0893736	-0.104281	-0.393913	0.168612	0.294311	0.0630908	-0.191576	-0.317074	-0.12998	0.231794	-0.0662913	0.0520344	0.0411634	0.00883245	-0.102702	0.301843	-0.218924	0.0548553	0.206373	0.00957108	-0.1878	0.155511	0.110887	0.207367	0.217103	-0.164876	-0.20331	-0.245442	0.140738	-0.284374	-0.166263
ART3	0.185602	-0.0358334	0.09623	0.0405836	-0.0745649	0.0321169	-0.051466	-0.0377698	-0.0344057	0.176729	-0.0120482	-0.00118351	0.0451522	0.108883	0.0453916	-0.000875	0.0626678	0.205037	0.0342345	-0.0745916	0.0166116	-0.119654	0.000126	0.0182085	0.0568857	-0.0381179	0	0.07798	0.0653687	-0.0278573	-0.0958042	0.104122	0.112396	0.0940747	0.0643125	-0.0121112	-0.00546026	0.0571303	0.118518	-0.11261	-0.00890303	0.0616856	-0.095026	-0.0317621	0.121669	0.225338	-0.0288248	0.068007	-0.0673308
ART4	0.207566	0.00736237	0.0179319	-0.438744	0.623644	-0.148744	0.285561	0.0208626	-0.265256	0.196615	0.369577	0.163982	0.536614	0.140073	-0.2968	-0.366829	0.0311813	0.440535	-0.0425272	-0.238506	-0.257341	-0.272691	-0.395825	0.102885	-0.0018034	-0.0989723	-0.552595	-0.343497	0.360347	-0.380061	-0.533358	-0.146017	-0.356348	0.0990496	0.193231	0.0184059	0.681792	0.157521	-0.0524788	0.344245	0.0667133	0.266662	0.521668	-0.225747	-0.354618	0.38893	-0.364705	-0.0529671	-0.350217
ARVCF	0.0531669	-0.164819	0.179325	0.238074	-0.0910058	-0.0241556	-0.34324	-0.0634451	0.0924005	-0.121263	-0.301788	-0.561307	-0.199634	0.0574932	0.0869765	0.163648	0.323073	0.38442	-0.217819	0.307385	0.101259	-0.21598	0.422142	0.394226	0.138377	0.380806	0.143898	0.338529	0.35468	0.0717344	-0.0400577	0.167208	0.155426	0.174449	-0.011467	-0.07693	-0.239981	0.0490246	-0.408689	-0.271466	-0.0252538	0.0862684	0	-0.0421481	0.0831833	0.320968	-0.331769	0.0880899	0.621029
ASAH1	0.0168753	-0.229139	0.233373	-0.00750828	0.194792	-0.257048	0.137142	0.136849	0.236343	0.378018	0.173419	0.234318	-0.038413	-0.160062	-0.35149	-0.255097	-0.383423	-0.0124273	0.292231	-0.172951	-0.168486	-0.00301933	-0.34278	-0.239004	-0.215385	-0.293116	-0.27622	-0.104553	-0.399316	-0.358077	-0.647086	-0.219308	-0.272357	-0.423281	-0.14572	-0.0650902	0.171821	0.153127	0.0422535	0.213052	0.0113707	0.121952	0.0236797	-0.286528	0.014636	0.0463638	-0.236765	-0.36204	-0.395468
ASCL1	-0.361597	0.633828	-0.202434	-0.0606885	0.203249	-0.136773	0.689887	0.501431	0.348564	0.185494	0.335638	-0.42798	-0.067935	-0.310494	0.0725803	-0.20562	0.53947	-0.0037241	-0.26056	-0.121018	0.589381	-0.347099	0.654365	-0.246674	-0.0675917	-0.286869	0.372673	0.237827	-0.148383	0.725091	-0.277469	-0.14301	0.0369263	1.79326	0.166057	3.65526	0.0251951	-0.050004	0.0381598	-0.152164	0.520141	0.0139399	0.0225224	0.870244	-0.204644	-0.398363	-0.333643	-0.436788	-0.185122
ASCL2	0.135616	0.133036	-0.098072	-0.0850129	0.047955	0.296871	0.0470743	0.18157	0.295453	-0.109749	-0.138128	-0.211582	-0.00930071	0.110602	-0.152381	0.0792146	-0.126371	-0.323545	0.135586	0.245391	0.0736437	0.130714	-0.0154448	0.197239	-0.1958	0.0638461	0.0658369	0.131808	0.20585	-0.258166	0.351308	0.331655	0.0859089	0.488716	0.370729	-0.123814	-0.104343	0.0833478	0.0576591	0.0238457	0.124636	0.0155921	0.0418553	-0.272697	-0.315678	0.156855	-0.482343	-0.155349	0
ASGR1	-0.0231075	0.170498	0.00702763	-0.023531	0.0546484	0.218172	0.0774507	-0.0588827	-0.0457602	-0.167645	-0.279443	0.0380354	-0.291146	-0.267038	-0.111629	-0.0812311	-0.117001	-0.362153	0.160043	0.035017	0.253406	-0.258139	-0.0332098	0.150706	-0.107018	0.445962	0.0283737	0.154479	-0.10358	0.0036087	0.04778	0.094697	-0.153953	0.0362263	0.0097847	0.0738535	-0.0745144	0.298712	0.0979414	0.0387583	0.034338	-0.0455837	-0.223281	0.0832281	0.0576258	0	0.128384	-0.109201	0.222095
ASGR2	0.174632	0.392247	0.0410738	0.138122	0.0735159	-0.190145	-0.0957603	0.0143881	-0.248371	-0.255796	-0.276391	-0.240036	-0.120713	-0.257263	0.167552	0.0880747	-0.0729313	-0.172585	-0.0936585	0.0670004	0.0300331	-0.485915	-0.125299	0.0315638	-0.108361	0.313528	0.262059	0.25816	-0.0329847	-0.223314	-0.376812	0.272227	0.0582619	0.390251	0.28274	0	-0.120028	0.0322781	-0.0920658	0.0451365	-0.340301	-0.544723	-0.233139	0.000697	-0.11006	0.193878	0.0558739	-0.226706	-0.0614157
ASIP	-0.0187159	0.0744438	-0.0943208	-0.187386	-0.169896	0.241933	0.0229864	0.0578685	-0.00629139	-0.251647	-0.204962	-0.188772	-0.247668	0.13554	0.231551	0.29056	0.00900507	0.204971	-0.273943	0.266421	-0.120159	0.0533056	-0.0977001	-0.126556	0.00129747	-0.0696759	0.125355	0.154284	0.179469	0.230084	-0.0222745	-0.0932655	0.088522	0.0618572	-0.0573692	0.063097	0.012651	-0.179701	-0.113051	0	-0.100706	0.204425	-0.242421	0.033577	-0.0149798	0.00180483	-0.170704	-0.16102	-0.00456238
ASL	0.302071	0.203326	0.162622	0.0741758	0.093894	-0.0317478	-0.00641823	-0.00549126	-0.0506191	-0.11454	-0.318183	-0.0575361	-0.101999	0.218126	0.295604	0.00759029	-0.309353	-0.162551	-0.0302582	-0.212801	0.22429	-0.372519	-0.0654078	0.217885	-0.0934887	0.380149	0.135891	0.238001	0.173012	-0.110397	-0.188155	0.0079031	-0.266046	0.274086	0.650101	-0.0567274	0.186181	0.114233	0.040679	-0.148091	-0.155794	-0.48997	-0.199912	0.0166292	-0.289965	0.322186	-0.0578184	-0.519264	0.0687761
ASNA1	0.130941	0.133839	0.124066	0.117539	-0.0036869	-0.120653	0.0514426	0.0478702	-0.173972	-0.13522	-0.0202622	-0.135112	-0.227102	-0.33059	-0.312537	-0.405661	-0.00205135	-0.445811	-0.0227938	0.0185843	0.28334	-0.303661	-0.151146	0.199243	-0.29602	0.300124	0.206892	0.117667	0.0826664	0.136846	0.132592	0.0055809	-0.0594778	0.0384698	0.0220737	0.174124	-0.0612912	-0.0807681	-0.103331	0.206809	0.180898	-0.0403852	-0.0356946	-0.047596	0.0584631	0.31524	0.197219	-0.0814509	0.0899992
ASNS	-0.197388	-0.0134091	0.104294	0.0400286	-0.177912	-0.204329	0.0544782	-0.324577	-0.0185642	0.126503	-0.0515151	-0.228353	0.0746937	0.212101	-0.191508	-0.0679803	-0.0568829	0.00645161	-0.0706015	0.488754	-0.161186	0.318838	0.474778	0.0217381	0.279605	0.0863342	-0.113594	0.0548263	0.336564	0.0908985	-0.0404573	-0.147084	0.152959	-0.10285	-0.0993795	-0.112495	-0.167355	0.0140319	-0.00693989	-0.113685	-0.134628	-0.13156	-0.150108	-0.107999	0.362571	0.148251	0.238147	0.594318	0.026228
ASPA	-0.345578	-0.445259	-0.557886	-0.109001	0.251805	-0.296089	0.255737	0.0872059	0.0183878	0.784286	0.707977	0.406173	0.0199561	-0.0396833	-0.56881	-0.149045	-0.0367966	0.355127	0.350653	0.0351539	0.249383	-0.00811052	-0.344106	-0.0400786	0.181231	-0.224192	-0.20512	-0.260945	-0.228027	-0.210711	-0.480907	-0.0412407	-0.0718913	-0.484072	0.368512	-0.0843954	0.167723	0.516247	0.595798	0.111888	0.139817	0.214237	-0.217369	0.480158	-0.472866	0.16416	-0.0385819	0.0848937	-0.0523667
ASPH	-0.293654	-0.311157	-0.0457239	-0.101926	0.198967	-0.122848	0.0243592	0.166538	0.0159388	0.288553	0.487666	0.101343	0.0708976	0.0622745	-0.303514	-0.0591583	-0.030951	0.114446	-0.0169992	-0.0266776	0.0843782	-0.20456	-0.0927682	-0.190352	-0.270833	-0.422586	-0.100072	-0.241302	-0.119722	-0.490221	-0.399654	-0.0041852	-0.0716906	-0.180987	-0.0112309	0.0415568	0.257651	-0.225868	-0.0920663	-0.177729	0.162997	0.259909	0.176559	-0.0213847	0.267088	0.108097	-0.0584359	-0.0236735	-0.35462
ASS1	0.293201	0.197897	-0.0506477	0	0.0577021	0.219144	0.078392	-0.358731	0.281812	0.0247345	-0.511786	-0.595484	0.17461	0.362959	0.592489	0.339262	-0.143442	0.1595	-0.270112	-0.609077	0.738931	-0.566632	-0.00578213	0.716896	-0.184912	-0.0219822	-0.0298748	0.252376	0.719115	-0.0482454	-0.585635	0.0505848	-0.42385	0.428465	0.721048	-0.190336	-0.018878	0.0463877	0.398486	-0.177124	-0.365202	-0.13942	-0.25991	0.227472	-0.315244	0.278317	-0.325471	-0.268423	-0.255941
ASTN1	-0.0373154	0	0.101461	0.154308	-0.0454755	0.109192	0.0520868	-0.175352	-0.0176535	-0.263653	-0.174878	-0.0585985	-0.201161	-0.0845914	0.120468	0.0777669	0.0504303	0.0436697	0.0189476	0.076045	-0.0797176	0.136026	0.336572	0.0455418	-0.0332551	0.0730429	0.0307789	0.232255	0.156148	0.146453	0.296199	0.0942488	0.23587	0.157634	-0.14818	0.176954	-0.0725527	-0.00687885	-0.148532	-0.0851507	-0.164708	-0.0493197	0.150061	0.0249562	-0.265935	0.031404	-0.137841	-0.106709	0.120418
SERPINC1	0.116538	0.0141296	-0.0618315	-0.0148811	0.246754	0.18644	0.102046	0.272526	0.176844	0.145292	0.156376	-0.0347519	-0.118452	-0.110969	-0.279593	-0.166852	-0.228019	0.011488	0.223593	-0.302143	-0.0783663	-0.40996	-0.602245	-0.154933	-0.176687	-0.0606356	-0.0941162	-0.290791	-0.147215	-0.349647	-0.734181	-0.216724	-0.321641	-0.189631	-0.125096	-0.163795	0.136209	0.155279	0.0696545	0.188984	-0.0428724	0.0411654	0.153678	-0.212955	-0.309934	0.0623322	-0.13425	-0.290664	-0.302101
ZFHX3	0.0423627	0.0976	0.02772	-0.100443	-0.217973	0.199442	-0.0530596	-0.185688	-0.115901	-0.20825	-0.194652	-0.0412502	0.145668	0.450137	0.202813	0.323008	0.370316	0.123144	-0.115584	0.0698905	-0.0135298	-0.0661721	0.186893	0.075448	0.0657425	0.265761	0.17836	0.0276556	0.227803	-0.0391831	0.179683	0.272755	-0.0546632	0.0684891	0.0507636	-0.0788898	-0.115314	-0.0834055	0.0137725	-0.160058	0.038486	-0.0458589	0.00345326	0	0.0659156	-0.0110288	0.107255	0.21036	0.478566
ATF1	0.0809622	-0.428855	-0.312758	0.0394321	0.248828	-0.450206	-0.162048	0.17043	-0.354063	0.353348	0.0514803	-0.00391865	0.0970168	0.266743	-0.237926	0.136811	-0.0395231	0.12817	0.117668	-0.342442	-0.176977	-0.317811	-1.02643	-0.0831099	-0.170062	-0.21508	-0.420919	-0.197742	-0.236655	-0.15837	-0.561543	-0.299887	-0.309236	-0.13013	-0.220064	-0.0966058	0.119388	0.114536	0.0760751	-0.0295501	-0.103081	-0.180861	-0.175536	0.0514579	-0.340325	-0.00935173	-0.123793	-0.326402	-0.395411
ATF3	0.0504036	-0.0357094	-0.320453	-0.14725	0.0877471	0.270928	-0.00518084	-0.0385885	0.441135	-0.0834575	0.0320063	-0.0325346	0.207549	1.09825	0.155712	0.195839	0.0239239	-0.136571	0.0173292	-0.0183415	-0.13069	-0.19584	-0.0800252	-0.194439	0.0423217	-0.130213	0.0954485	-0.0722828	-0.0862188	0.229013	-0.113499	0.0854507	0.159213	-0.0162363	-0.220512	-0.164753	0.0305052	0.254405	0.00649834	0	0.0323877	0.275077	0.134188	-0.0782108	-0.103755	-0.0557098	-0.110993	0.0610795	-0.113871
ATF4	-0.222124	0.124586	0.287617	0.149011	-0.11833	0.146542	0.0385504	-0.258724	0.125907	-0.0728517	-0.349839	-0.0560918	0.0102596	-0.0155644	0.16457	-0.0491476	-0.672674	-0.16643	0.150761	0.495473	-0.0663991	0.0146837	-0.057395	-0.16557	0.0891633	0.274467	0.0792785	-0.05161	0.169132	0	0.425129	-0.034771	0.180552	-0.397997	-0.146086	0.125747	-0.00530815	0.0451555	0.0230341	0.15341	-0.0178037	0.0526032	0.060359	-0.188983	0.313521	-0.0208011	0.375291	0.10962	-0.052597
ATIC	0.215881	-0.557568	-0.0481992	0.292896	0.165022	-0.501345	-0.173376	0.118971	-0.330339	-0.0503902	-0.117594	-0.218514	0.0657878	-0.0226264	-0.287812	0.080883	-0.0367584	-0.176313	0.0942984	-0.0549541	0.121996	-0.23755	-0.07441	0.0463347	0.0361843	-0.0161571	-0.00167036	-0.00646257	-0.290942	-0.397462	-0.526022	-0.13322	-0.209102	-0.427738	-0.207272	0.320175	-0.0864963	0.147006	-0.581731	-0.152468	-0.151343	-0.318874	0.0280085	-0.235806	0.0930037	-0.0781736	0.0448213	0.111696	-0.211683
ATM	-0.149187	-0.223033	-0.0838656	-0.188323	0.427823	0.133426	0.504843	0.563114	0.333395	0.934336	0.631191	0.607705	0.179638	-0.0308695	0.0710673	-0.332796	-0.132926	-0.0933332	0.522191	-0.117089	0.105609	0.180453	-0.174773	-0.0927882	-0.0143099	-0.233974	-0.339955	-0.436772	-0.34365	-0.281083	-0.34899	-0.013556	0	-0.290198	-0.138445	-0.297325	0.407785	0.338079	0.396049	0.305145	0.48545	0.478417	0.486308	-0.00113916	0.120744	0.164764	0.110487	0.0562735	-0.446488
RERE	-0.145607	-0.141468	-0.124211	-0.1422	-0.0218258	0.416548	0.0715027	0.00217533	0.0696282	0.0991006	0.15338	0.21189	0.126357	0.421679	0.236512	0.191576	0.172617	0.203865	-0.0969825	0.170896	0.0277953	0.0188427	-0.0116348	0.100407	0.165581	0.0204091	-0.21634	0.149431	0.119847	-0.024087	-0.169729	0.0655255	-0.0108376	-0.13729	0.0483146	-0.185613	-0.0485706	-0.0360799	-0.120816	-0.0664091	0.0386963	0.0876398	-0.0720048	0.0636253	0	0.134426	-0.0941014	0.216329	0.096868
ATOH1	0.0101523	0.171736	0.247978	0.0352454	-0.111223	-0.0415225	-0.18318	0.0555635	-0.155588	-0.182308	0.113391	0.00919914	-0.199207	0.0686068	-0.430851	-0.177065	0.120459	0.1267	-0.242256	-0.0669599	0.0162992	-0.217097	0.506802	-0.166123	0.10754	0.136226	0.0180678	0.166353	0.355215	-0.021925	0.0705662	-0.147411	0.169292	0	-0.0256934	-0.0378761	-0.179494	-0.129649	0.00918245	-0.0979061	-0.16669	-0.041018	0.0437441	0.126344	0.0438681	-0.320231	0.0106983	-0.102969	0.072494
ATOX1	-0.0323133	0.183611	0.0281229	-0.00988865	-0.00113487	0.374184	0.129073	0.129539	0.144382	-0.0284147	-0.111215	-0.0927019	-0.168199	-0.165508	0.0991821	-0.0558872	0.0202551	-0.209504	0.0232143	-0.0830755	0.119907	-0.219412	-0.174933	-0.0395565	-0.035697	0.151167	0.0541067	-0.0741911	0.169388	-0.235194	-0.205145	0.227317	0.0384722	0.104817	0.190953	0.0894623	-0.0151482	-0.0154686	0.10045	0.0559092	0.120827	0.264241	0.0459757	0.105261	-0.121715	0.349122	0.130944	-0.247163	-0.153907
ATP1A1	-0.00205421	-0.0548782	0.012578	0.103992	-0.0141659	-0.0673113	0.0571995	-0.0924482	-0.320444	0.0161858	-0.0201063	-0.194643	0.0296755	0.177187	-0.233651	0.0590868	0.0109453	0.139008	0.0622873	0.0326986	0.0728016	-0.528284	-0.740652	-0.0140638	-0.0711041	0.0272036	-0.0801048	-0.0377035	-0.0698853	-0.0949182	-0.565119	-0.208386	-0.244143	-0.302493	-0.185287	-0.058464	-0.0318556	0.144658	0.0606871	0.00182533	-0.111485	0.0958652	-0.0628633	-0.140019	-0.0926733	0.0218029	-0.205403	-0.544781	-0.259445
ATP1A2	0.00473785	-0.0216265	-0.0446558	-0.00203991	-0.198607	0.273718	0.0658398	-0.00932503	0.215331	-0.0540447	-0.028244	0.161945	-0.0665374	0.279522	-0.293598	-0.0616035	0.190125	0.136466	0.109548	0.174588	-0.181192	-0.0353961	0.00387001	-0.147646	0.15571	-0.16023	0.0195875	0.0992017	0.113322	0.104008	0.216299	0.101755	0.0353951	0.161701	-0.0235767	-0.200944	-0.0946479	-0.0801969	-0.12067	-0.0102806	-0.198475	0.186772	0.0989809	-0.12067	-0.0928721	0.00896931	-0.264223	-0.0821705	0.143117
ATP1A3	-0.0337291	0.377816	0.145786	0.010994	-0.0317893	0.214919	0.138546	6.87e-05	0.204913	-0.304527	0.192795	-0.123166	0.0262055	-0.0190325	0.124365	0.0989127	-0.0914207	0.263495	0.0506453	0.0956387	-0.166242	-0.0314326	-0.133463	-0.00955725	-0.125884	0.0522814	0.0636396	0.0404959	-0.0609994	-0.208762	0.133513	-0.27698	0.02036	0.277708	0.0563717	-0.126233	0.00756025	0.0877085	0.378558	0.160749	0.135322	-0.0651283	-0.0786509	0.000962	-0.0532408	-0.0215259	0.0354271	-0.0228424	0.0394444
ATP12A	0.101977	0.403616	0.0283599	-0.0386591	-0.125002	0.290575	-0.0374866	-0.0215998	0.0978641	0.0686107	0	0.0482049	-0.022943	-0.0504351	-0.0434537	0.120341	0.0199189	-0.0173287	0.0339985	-0.0479937	-0.11408	0.192612	0.80905	0.0202808	0.182898	0.0724196	-0.149415	-0.00452423	0.0907874	0.132066	0.062789	0.0919704	0.158886	0.0814872	0.0273538	-0.00827122	0.0540891	-0.0140991	0.169425	-0.108573	-0.0321293	0.181743	0.117239	-0.0233874	-0.0759807	-0.00619221	0.0414734	0.0356555	-0.0383229
ATP1A4	0.05269	0.063622	0.0571113	0.104015	-0.0507202	0.0728345	-0.0950031	-0.125244	-0.0242534	-0.102502	-0.0202189	-0.0454197	0.0876832	0.0263486	0.0609126	0.0126224	-0.0987577	-0.00896454	-0.0104299	-0.0147424	-0.0978093	0.0027194	0.196496	0.0200167	0.000975	-0.0478511	0.0377927	0.0432401	-0.0203648	0.109808	0.114554	-0.050365	-0.00062	-0.0383191	0.0609412	-0.0111361	-0.100137	0.0633745	0.180544	0.0861111	0.0111957	-0.0102758	-0.0755296	-0.0579515	-0.0545902	-0.0247884	0.083776	0.145269	-0.0741229
ATP1B1	0.247301	0.0213814	0.299313	0.142232	0.0980301	0.314895	-0.128277	-0.176824	-0.265756	-0.228022	-0.0243511	-0.0701857	0.357476	0.511065	0.0150824	-0.0375423	-0.0198536	0.0409279	0.16654	-0.273942	0.254312	-0.122475	-0.261408	0.162825	0.0861588	-0.0674982	-0.292746	-0.477017	-0.29764	-0.376936	-0.821542	-0.112013	-0.107403	0.242178	-0.10837	0.00607109	0.0211039	-0.212573	-0.210921	-0.223768	-0.473696	-0.125972	-0.157706	0.0349503	-0.188855	0.0419455	-0.100524	-0.0768919	-0.279558
ATP1B2	-0.217773	0.182659	-0.114753	-0.0592976	0.0014205	0.544404	0.199545	-0.0619674	0.111486	-0.117762	-0.168233	-0.0657244	0.143286	1.15356	0.260545	0.669403	0.663292	0.379487	-0.172061	0.0747099	-0.112014	-0.172476	0.416824	0.0370393	0.149115	0.147067	0.137827	0.230788	0.307054	0.136889	0.13771	0.28164	0.00652885	-0.0128884	0.0120049	0.0212626	-0.438745	0.0542007	0.0516491	-0.00763702	-0.0326638	-0.00903749	-0.171912	0.209521	-0.396614	0.0785556	-0.0720429	-0.00435352	0.103719
ATP1B3	-0.0673294	0.361688	-0.26067	-0.0150113	0.212084	-0.13909	-0.0864821	0.413783	-0.168126	-0.190294	-0.261794	-0.00278425	0.281829	0.00679684	-0.561098	0.457408	-0.074163	0.0261626	-0.324176	-0.223166	-0.0778956	-0.0098629	-0.220923	-0.192185	0.12707	-0.62425	-0.173245	-0.301628	0.0154543	-0.216045	-0.312242	0.0579176	-0.127241	0.213094	-0.145006	0.0127177	0.020216	-0.0658951	-0.0899649	0.245369	0.0884271	0.178635	0.199327	0.116283	0.0926733	-0.0606589	-0.263152	0.342576	-0.237283
ATP2A1	-0.0494833	0.178892	0.17309	-0.0686293	0.0604663	0.517391	-0.0611696	0.0709596	0.2837	-0.0349875	-0.0427761	-0.0448279	0.025125	-0.0226822	0.154494	0.102758	0.258753	-0.0103912	0.0331702	-0.109579	0	0.0915184	0.0740547	-0.00524139	0.0690885	0.0585933	-0.17411	0.10832	0.190193	0.0694704	0.25101	0.0553169	0.0458365	0.210638	-0.0378032	0.058866	-0.0471249	-0.0440526	0.155132	-0.00949717	0.0434275	0.150434	-0.0134149	-0.171859	0.103757	-0.0947614	-0.0299339	-0.0589337	0.0680223
ATP2A2	-0.3754	-0.651326	-0.672835	0.203426	0.109204	0.440769	0.157435	0.172344	-0.0618038	0.487885	0.182074	0.226319	0.618884	0.114248	0.327114	0.179595	0.0782499	0.110761	0.371995	-0.0294218	0.188804	-0.388764	-0.338448	-0.342485	0.0247564	0.0850506	0.0999651	-0.167821	-0.844535	-0.444483	-0.288109	0	-0.199285	-0.603507	-0.575182	0.135043	0.0799236	-0.119481	-0.08815	-0.070734	0.591184	0.134641	0.279807	-0.180781	0.693187	-0.0953703	0.278193	-0.0772753	-0.231318
ATP2A3	-0.162074	0.107483	0.106047	-0.0088973	-0.277386	-0.188602	-0.263526	-0.240211	0.041204	-0.0870933	-0.0505457	-0.239524	0.0615492	0.120097	-0.106718	0.154526	0.0537677	0.00032	-0.0479393	0.303909	-0.0120893	0.301969	0.264205	-0.116342	0.164801	0.0805526	0.127414	0.402746	0.158873	0.267214	0.0976248	-0.0386887	0.204696	-0.158253	-0.253562	0.0607462	-0.0429964	-0.138453	-0.194224	-0.0822539	-0.269165	0.212043	-0.0654044	-0.0589371	-0.0236135	0.0384793	0.0599718	0.0977225	0.380796
ATP2B1	-0.149387	-0.0912847	-0.20259	-0.0393028	0.374792	0.111515	-0.0902605	0.301552	0.121942	0.572076	0.210605	0.362842	0.186571	-0.171646	0.00686407	0.0549355	0.101117	0.0598459	0.318586	0.114374	0.143853	-0.0525374	-0.323075	0.0755801	-0.0931501	-0.187534	-0.312879	-0.178769	-0.0968976	-0.421445	-0.435483	-0.132628	-0.253628	-0.182835	-0.412063	-0.146847	0.198483	0.314533	0.0844584	0.12939	0.237171	0.266165	0.278308	-0.0131731	-0.188966	0.291887	-0.259104	-0.068943	-0.396299
ATP2B2	0.310263	0.256325	0.112587	0.000965	-0.248632	0.0836477	-0.0273299	-0.316744	-0.22063	-0.266524	-0.0914726	-0.111574	-0.00301933	0.119033	0.344989	0.493807	0.298666	-0.015398	-0.264236	-0.0178165	-0.0922465	0.0173903	0.321492	0.0812669	-0.046648	0.493062	0.00328302	0.226471	0.381577	0.0535779	0.313889	-0.000191	-0.155839	0.368016	0.809324	0.0476742	-0.331235	-0.0917821	0.128085	0.00527859	-0.295503	-0.0159202	-0.381885	-0.0343413	-0.247552	0.449669	-0.259467	0.0858464	0.38708
ATP2B3	0.339117	0.198132	0.245276	0.0771117	0.0199895	0.435476	-0.21238	-0.0393987	-0.0333548	-0.241978	-0.0699801	-0.222082	-0.0554862	-0.198061	0.140092	0.069396	0	0.224664	-0.0230646	0.103333	-0.174193	0.0182962	0.104087	0.108115	-0.144821	-0.0637951	-0.142324	0.173945	0.107798	0.244105	-0.128891	-0.123077	0.165216	0.286264	-0.00926638	0.336454	0.0024519	-0.0068264	-0.0106611	-0.0644503	-0.127708	0.187981	-0.0630608	0.121797	-0.0394502	-0.0769334	-0.107333	0.0866909	0.134831
ATP2B4	-0.318895	-0.0529327	0.134317	0.04	-0.174345	-0.17939	-0.0481777	-0.0288882	-0.133528	0.344014	-0.154728	-0.175914	0.3793	0.03547	0.0480509	0.0605588	0.24428	-0.0959997	-0.0899348	0.19908	0.0780067	-0.12762	0.187564	-0.194736	0.0992541	-0.0477781	-0.00944519	0.186531	0.475824	-0.0745425	0.0573287	0.291652	-0.229738	-0.0715542	-0.285669	-0.105948	-0.368179	0.0132995	-0.188233	-0.0268764	0.154466	0.0831127	0.168064	-0.0815601	0.0409603	0.262979	-0.295859	-0.0117302	0.187043
ATP4A	0.219339	0.503391	0.0219321	-0.00373363	-0.0183277	0.0548391	-0.0502987	0.00973225	-0.076601	-0.211184	-0.0743194	-0.0371728	0.00625324	0.0693455	-0.0432043	-0.0182719	0.1373	0.132663	-0.127548	0.145027	-0.0631447	0.0350819	0.26911	0.128649	0.0274863	-0.0336699	0.140968	0.0284839	-0.00971794	0.125997	0.334195	0.0299096	0.041882	0.198894	0.1498	0.0781207	-0.158576	-0.183609	-0.01578	-0.119911	-0.0172801	0.084055	-0.144568	-0.0102129	-0.117784	0.110086	-0.0157151	-0.00301313	-0.114297
ATP4B	0.108939	-0.0247316	0.127646	0.0271535	-0.110311	0.205101	0.116416	-0.0536971	-0.0928216	-0.070591	-0.15134	0.0687437	0.13139	-0.101251	0.0516191	-0.0361033	0.0228939	0.148073	-0.159466	0.00166082	-0.232588	0.00751638	0.329694	0.11018	0.251993	-0.0266418	-0.0424323	0.13677	0.30523	-0.0244484	0.0364017	0.122926	-0.0346727	0.108734	-0.142651	-0.0489893	0.0136652	-0.253468	0.0385861	-0.153649	-0.0676642	0.123716	0.157841	0.0780845	-0.0567603	-0.00235319	0.0374341	-0.0697532	-0.0910616
ATP5A1	0.13801	0.0171719	-0.160645	-0.0371551	0.119694	0.156398	0.0960159	0.179095	0.0154104	0.181207	0.219013	0.00063	-0.235442	-0.302327	-0.182074	-0.116027	-0.0949688	-0.147323	0.0916777	-0.334085	0.193099	-0.492236	-0.545888	-0.0151272	0.00885296	-0.0277243	-0.133278	-0.304022	-0.179303	-0.193877	-0.697833	-0.222036	-0.440071	-0.0578775	0.233998	0.0509071	0.113354	0.121768	0.0358114	0.136053	0.0567837	-0.00575066	0.106159	-0.121701	-0.0927153	-0.133232	-0.074297	-0.459144	-0.467862
ALDH7A1	0.227656	0.0070076	0.149849	0.0889072	0.346996	0.156568	0.544837	0.366349	0.427897	0.583969	0.205666	0.196869	0.0204182	-0.184975	-0.104758	-0.341988	0.0239706	0.198997	0.258248	-0.627169	0.196713	-0.393378	-0.78539	-0.149995	0	-0.272505	-0.172274	-0.167033	-0.394596	-0.336164	-0.943614	-0.151071	-0.183446	-0.093523	0.0926132	0.279835	0.322485	-0.0230942	0.360038	0.0354815	0.0834122	0.181777	0.0928679	0.114128	-0.234236	-0.19268	-0.200856	-0.430225	-0.22301
ATP5B	0.33421	0.218184	0.169003	0.274286	-0.0405951	0.200306	-0.0301342	-0.172509	-0.28373	-0.121954	-0.0738821	-0.227586	0.281516	0.149622	0.239703	0.224889	0.278357	0.338054	-0.0794506	-0.293666	0.131048	-0.350957	-0.923729	0.193076	0.0222921	-0.185711	-0.138425	-0.214115	-0.132428	-0.280762	-0.947746	0.0327778	-0.266858	0.138006	0.380326	0.295845	-0.0356855	-0.039629	-0.00688744	-0.193692	0.0204058	-0.262726	-0.159533	0.0436621	-0.0215788	-0.0319042	-0.104861	-0.54048	-0.491906
ATP5C1	0.144386	-0.0544767	-0.0810614	0.034029	0.363046	0.150441	0.27566	0.256891	0.233555	0.295774	0.323595	0.165808	-0.271825	-0.458608	-0.420267	-0.327286	-0.341928	0.0838757	0.409118	-0.380818	-0.164433	-0.534203	-0.926878	0.0337181	0	-0.31616	-0.26538	-0.39803	-0.740956	-0.337764	-0.94409	-0.262828	-0.045599	0.00764275	-0.0339365	0.0416708	0.269047	0.24489	0.249823	0.198548	0.254886	0.214121	0.283405	-0.209036	-0.424818	-0.143167	-0.137777	-0.395293	-0.56224
ATP5D	0.26407	0.328339	-0.0804939	0.0718031	-0.0970125	0.255622	0.0441952	-0.150758	-0.112918	-0.34176	-0.293743	-0.339231	0.47399	0.653602	0.67047	0.566155	0.516917	0.624393	-0.37503	-0.0444899	0.113988	-0.341417	-0.209085	0.33091	-0.0939026	0.313668	0.262836	0.302916	0.176969	-0.0897455	-0.256062	0.194555	-0.0413408	0.410193	0.424237	0.263944	-0.0893421	0.00872135	-0.0564404	-0.0201349	0.0284414	-0.11405	-0.279462	0.23312	-0.00193977	0.132121	0.069231	-0.296876	0.213706
ATP5F1	-0.0269113	-0.250039	-0.089242	0.0982604	0.362021	0.417538	0.445918	0.352345	0.13487	0.306828	0.22083	0.182755	-0.054389	-0.0753999	-0.156818	-0.166201	0.075325	0.0615664	0.274509	-0.14199	0.236631	-0.499394	-0.599947	0.0577807	-0.0151296	-0.293046	-0.184859	-0.30437	-0.178894	-0.279433	-0.439963	-0.241439	-0.1515	-0.332986	-0.024992	-0.127139	0.289559	0.319599	0.141036	0.316554	0.242273	0.082222	0.325748	-0.0185866	-0.285245	-0.0442247	0.0164318	-0.244993	-0.553817
ATP5G1	-0.0724382	0.0659165	-0.251081	-0.171035	0.0200453	0.520851	0.62928	0.438141	0.359441	-0.0836444	0.396078	0.169129	-0.204535	-0.161196	0.0158405	0	-0.0226402	-0.104125	0.0248208	-0.407556	-0.237146	-0.393534	-0.0922914	0.21771	-0.287882	0.260519	0.00453568	0.0623217	0.273602	0.0157299	-0.152428	-0.405553	-0.270912	0.200363	0.127643	-0.17821	0.142328	0.213942	0.197258	0.401552	0.346047	0.319734	0.250785	-0.258795	-0.243749	-0.175435	0.227808	-0.190297	-0.11318
ATP5G2	-0.116024	0.216072	-0.293717	-0.0820847	0.153625	0.396711	0.0948191	0.21303	0.0760737	-0.282492	-0.220578	0.023531	0.0012331	0.0678415	0.201817	0.204888	0.00114346	0.0710983	-0.0839672	-0.0412798	-0.100858	-0.22732	-0.11437	0.2779	0.0129261	0.205392	0.0346231	0.305161	0.114916	0.0617466	-0.0539408	-0.0687628	-0.206011	0.207582	-0.00405788	-0.171664	0	-0.0130854	0.045495	0.0813408	0.103305	0.090023	0.0696325	0.143597	0.0934858	-0.0458584	0.240178	0.00751781	0.0829716
ATP5G3	-0.0324788	0.0380473	-0.388989	0.0141912	0.0509596	0.412263	0.202547	0.342141	0.231111	0.136128	0.289151	0.0247035	0.148293	0.0300612	0.259524	0.0473323	-0.0208039	-0.0207529	-0.0617366	-0.122038	0.0208316	-0.0609756	-0.289238	0.216661	-0.165658	-0.158968	-0.0352554	0.0990229	0.0315614	-0.250107	-0.325809	-0.0863113	0.0222821	0.018033	0.113181	0.00104284	0.0794621	0.122714	0.0519233	0.0841165	0.267114	0.137058	0.0771999	0.00628805	-0.0459223	-0.231114	-0.0663424	-0.201234	-0.164424
ATP5I	0.167329	-0.0151138	-0.0294762	3.43e-05	0.141318	0.354403	0.422086	0.250312	0.252951	0	0.127389	0.205763	-0.506014	-0.595331	-0.0743971	-0.385034	-0.20064	-0.206306	-0.0622501	-0.0580502	0.143394	-0.380727	-0.12118	0.354762	-0.219226	0.210012	0.0691309	-0.0218115	0.0860472	0.020422	-0.135633	0.0618687	0.172132	0.251608	0.252784	0.163823	0.0586834	0.0501556	0.217937	0.333233	0.380729	0.0592508	0.21723	0.00528622	-0.0308867	0.236887	-0.00499916	-0.162579	0.0732756
ATP5J	0.188943	-0.0660944	-0.106341	0.250515	0.115602	-0.0284948	0.105052	-0.0166731	0.040297	-0.0209022	0.135396	0.0180926	-0.110104	-0.0508509	-0.123461	-0.221947	0.151899	0.163097	0.206897	-0.32179	0.0249562	-0.399149	-0.201795	-0.0240054	-0.246665	-0.116859	-0.0991917	0	-0.314178	-0.292355	-0.553513	-0.1427	0.0809751	0.0763969	0.134716	0.129348	0.202235	-0.0946755	-0.0153685	0.126113	-0.225865	-0.0161772	0.127364	-0.147288	-0.0685267	-0.207751	0.0251751	-0.4755	-0.0400143
ATP6V1A	-0.0135984	-0.244472	-0.1524	-0.0577698	0.4337	-0.178703	0.203691	0.00423813	-0.174048	0.211737	0.267547	0.0531311	0.157903	-0.219304	0.0162258	-0.0412416	-0.0285311	0.139099	0.21967	-0.277761	0.113475	-0.402292	-0.450167	0.0154905	-0.249053	-0.261285	-0.275302	-0.316936	-0.357901	-0.284299	-0.694844	-0.277526	-0.178657	0.0763588	-0.26292	0.0509214	0.422918	0.266272	0.0628738	0.348861	0.104019	0.0703793	0.185861	0.0113096	0.0621691	-0.072545	-0.22618	-0.413086	-0.636477
ATP6V1B1	0.127696	0.0730176	0.00672817	0.110928	-0.0454555	0.15279	-0.15555	0.025403	-0.01406	-0.120728	-0.0426126	-0.0549526	-0.150063	-0.219195	0.108707	0.130826	0.0134296	-0.151527	0.0405922	-0.0591455	-0.201145	0.107307	0.171346	-0.180474	0.023407	0.0766068	0.215281	-0.00899887	-0.0088048	0.359665	0.143434	0.0301404	-0.0756402	-0.0826554	0.0106087	0.185063	0.00216103	-0.104107	-0.102579	0.0235233	-0.0732894	0.166907	-0.023519	0.280075	-0.249757	-0.0606012	-0.0291371	-0.0286937	0.204507
ATP6V1B2	0.0414667	0.0469856	-0.181432	-0.192578	0.422174	0.113844	0.38663	0.304463	-0.033042	0.487735	0.410064	0.390238	0.280278	0.183414	-0.00280666	-0.0735903	0	0.0974979	0.351541	-0.248129	-0.0196896	-0.278216	-0.701775	-0.291327	-0.235857	-0.231493	-0.430901	-0.249878	-0.482048	-0.353814	-0.601356	-0.41915	-0.287256	-0.196479	-0.42166	-0.132384	0.271762	0.505597	0.220551	0.483799	0.251151	0.209693	0.38483	-0.180092	-0.0490456	-0.17721	-0.34096	-0.388838	-0.472706
ATP6V0C	0.105882	0.0539951	-0.169133	0.11434	-0.376948	-0.140671	-0.355536	-0.35118	-0.650505	-0.738761	-0.563455	-0.423264	0.167186	0.157321	0.251147	0.321475	0.326516	0.319943	-0.454307	0	0.263772	-0.00214386	-0.285982	0.379694	0.031127	0.202865	0.134159	0.31146	0.136334	0.165239	0.00789547	0.0859785	0.0362005	0.128544	-0.203697	0.157827	-0.462823	-0.385447	-0.401025	-0.37374	-0.237677	-0.467992	-0.359659	0.111145	0.308463	-0.0443926	0.106445	0.0117073	0.118836
ATP6V1C1	0.214661	-0.455428	0.481058	-0.0161915	0.437722	-0.340148	0.294097	0.353904	0.112894	0.551047	0.448625	0.202429	0.282714	0	-0.186395	-0.112432	-0.0261502	-0.0218692	0.428003	-0.34297	-0.0288963	-0.237753	-0.828377	-0.0362058	-0.185226	-0.543478	-0.51031	-0.679865	-0.586585	-0.369382	-0.714204	-0.381365	-0.295742	-0.387451	-0.343317	-0.0146837	0.574831	0.294307	0.339455	0.460979	0.317926	0.283213	0.364312	-0.262485	0.0430598	-0.153078	-0.245742	-0.42651	-0.861578
ATP6V1E1	-0.402005	-0.134207	-0.137985	0.16353	0.270056	0.0749188	0.321422	0.582499	-0.00785494	0.279633	0.363619	0.161434	-0.228658	-0.256832	-0.221313	-0.363394	-0.120787	-0.281998	0.240915	-0.158425	0.00902319	-0.162615	-0.618547	-0.203694	-0.0687656	-0.293365	-0.191634	-0.249762	-0.408559	-0.531366	-0.52056	-0.206901	-0.361576	-0.0508099	-0.355435	-0.15984	0.181509	0.231371	-0.0479536	0.469024	0.0848269	0.301977	0.194673	-0.115042	0.0136986	-0.00897217	0.0736938	-0.191887	-0.340196
ATP6V0B	0.0594511	0.0788164	-0.0213852	0.123953	0.0952415	-0.573155	-0.286506	-0.138597	-0.333214	-0.292161	-0.256788	-0.535078	0.130529	0	0.109926	0.18204	0.546127	-0.0033102	0.168883	0.0625143	0.25341	-0.187719	-0.731205	0.330845	0.106163	-0.362834	-0.124884	-0.0277357	-0.408447	-0.232292	-0.176086	-0.208317	-0.371698	0.0792332	0.13287	0.448148	-0.154531	0.0250139	-0.0832977	-0.0161505	-0.170756	-0.248469	0.134344	0.0386782	0.338222	-0.159537	0.157074	-0.157713	0.0578289
ATP6V0A1	0.00916767	-0.343604	0.0607195	-0.0725794	0.108169	-0.0594635	0.366885	0.0058136	0.0552311	0.351576	-0.0588236	-0.00862217	0.413328	0.326747	0.0253792	0.549495	0.458997	0.238693	0.269549	-0.0740366	0.155831	-0.486308	-0.399738	-0.18954	-0.155876	-0.209825	-0.106837	-0.331901	-0.300018	-0.318988	-0.550121	-0.193456	-0.0826159	-0.223018	-0.63742	-0.263735	-0.00259399	0.192041	0.118674	0.0559101	0.0798521	0.0822992	0.136429	-0.172116	0.225734	-0.0502358	-0.345492	-0.0294752	-0.188898
ATP6AP1	0.0336037	0.149154	0.101428	0.189548	-0.304887	-0.159655	-0.264142	-0.461723	-0.280157	-0.549476	-0.426411	-0.536457	0.115822	-0.0501413	0.138928	0.103526	0.0637484	-0.176872	-0.253264	0.0129061	0.114201	-0.230247	-0.350716	0.262915	-0.0256109	0.106665	0.0618792	0.209556	0.355583	0.0918675	0.107985	0.242724	-0.0780067	-0.00757408	0.0464897	0.0963821	-0.136303	-0.13067	-0.0364952	-0.226579	-0.264461	-0.218437	-0.289587	0.0531635	0.228067	0.109565	-0.11348	0	0.430147
ATP7A	-0.0236778	-0.144967	0.078074	-0.321201	0.0798893	0.0106597	0.221893	0.264335	0.154665	0.332567	0.281986	0.261689	0.120347	-0.0549731	-0.153597	0.00433064	-0.0419879	-0.0231261	0.246576	0.00628567	0.12033	-0.0061574	-0.17053	-0.0207253	0	-0.113599	-0.0900302	-0.218103	-0.126423	-0.193778	-0.0858111	-0.0972424	-0.174533	-0.248651	-0.227987	-0.122525	0.130679	0.260402	0.114544	0.15274	0.102795	0.204003	0.122567	-0.0247931	0.0559816	0.35713	-0.115484	-0.119144	-0.0783076
ATP5O	0.228303	-0.146767	-0.23436	-0.148433	0.307991	0.841455	0.393281	0.485313	0.429772	-0.00434303	0.375134	0.386858	-0.0143661	-0.171391	-0.182419	-0.0311432	-0.148217	0.0533295	0.208468	-0.276849	0.0741997	-0.373574	-0.48224	0.135306	-0.192706	0.135751	0.124071	-0.1724	-0.161489	-0.22846	-0.540951	0.0873852	-0.00845909	0.194303	0.127637	-0.295115	0.323184	0.387566	0.34471	0.464372	0.549521	0.35156	0.480889	-0.193593	-0.159324	0.0385914	-0.185375	-0.322457	-0.168049
ATP7B	0.253613	-0.000903	-0.0205698	0.106537	0.0306368	-0.148164	0.00438976	-0.140233	-0.14854	-0.272464	-0.00504589	0.174389	0.46905	0.330337	0.518695	0.355753	0.475488	0.317373	-0.0893364	-0.0240784	0.215876	-0.199611	-0.0402546	0.215343	0.245008	0.433234	0.203488	0.223079	0.34911	0.111738	0.0657167	-0.164024	-0.133918	-0.138148	-0.0109539	-0.00993061	0.0278101	0.237238	0.0468674	-0.0942173	-0.112715	-0.14133	-0.307224	-0.0190973	0.166184	0.215912	0.0341864	0.157515	0.0324144
ATR	-0.120129	-0.362936	-0.260467	-0.298643	0.178657	-0.230625	0.354767	0.150456	0.0238752	0.511999	0.208055	0.338403	0.0191374	-0.180174	-0.0669723	-0.37487	-0.0890965	0.00176477	0.140004	-0.0854969	0.0472841	-0.0647888	-0.228003	-0.146965	0.0688963	-0.144859	-0.338035	-0.389521	-0.230438	-0.139854	-0.321914	-0.102352	-0.26498	-0.620823	-0.387591	-0.28647	0.167188	0.36846	0.168214	0.10725	0.16104	0.142948	0.172603	0.0310278	0.0778532	0	-0.0238328	0.0790434	-0.461947
ATRX	0.107947	-0.31652	0.0398951	-0.280015	0.296859	-0.0434999	0.324091	0.348959	0.236045	0.64817	0.433756	0.499378	-0.0250354	-0.148571	-0.232313	-0.232208	-0.139283	-0.302034	0.304002	0.194667	0.186611	0.045095	-0.277729	-0.0747919	-0.0927639	-0.0555277	-0.253398	-0.460501	0.0201654	-0.144439	-0.363028	-0.152506	-0.188755	-0.106827	-0.0281515	-0.191864	0.395996	0.289517	0.0758882	0.297581	0.106532	0.305618	0.231237	-0.10966	0.00401068	0.146847	-0.181116	0.0814791	-0.233595
KIF1A	-0.0890479	0.343272	0.0110984	0.138916	-0.0244112	0.203765	0.0134611	-0.0923061	0.0485959	-0.217558	-0.243079	-0.133947	-0.217909	0.186729	0.0133319	0.171497	0.0180435	0.230556	-0.0892558	-0.207333	-0.092751	-0.0619392	-0.0901341	-0.00781584	-0.00725841	-0.0957665	-0.0455318	-0.0334797	0.328616	0.14328	0.073082	0.0278568	0.0261412	0.316486	0.0937614	0.215959	-0.087461	-0.00567341	-0.0115333	0.153663	-0.151288	0.11271	-0.00264549	-0.0552068	-0.278624	-0.200069	-0.0671668	-0.0371442	0.124928
AUH	0.219607	-0.0282774	0	0.105213	-0.00788593	0.094924	-0.297575	-0.132214	-0.0127716	0.353287	0.212984	0.10143	-0.132024	-0.144421	0	-0.0796499	0.228888	0.153699	-0.0122528	-0.0678196	0.102197	0.0401592	0.00374508	-0.0373993	-0.033761	0.0935373	-0.129682	-0.131145	0.0421791	-0.00123405	-0.373445	0.113048	0.06355	0.0370226	0.293619	-0.0165539	0.14823	-0.139304	0.0245857	-0.119727	-0.180164	-0.0322103	0.0372801	0.174686	-0.0444403	0.194233	-0.00810051	0.168794	-0.107781
AUP1	0.0967808	0.230796	-0.127903	0.0652323	-0.278446	-0.299517	-0.32639	-0.324809	-0.270453	-0.404213	-0.333706	-0.481268	0.134679	-0.00654221	0.111014	0.0677128	-0.0679283	-0.164326	-0.0328703	0.0056839	0.251756	-0.186336	-0.200176	0	0.0917072	0.0665798	0.134745	0.00461102	-0.138018	0.0133228	-0.247586	0.0118942	-0.199285	0.0776224	0.0583496	0.110765	-0.175038	-0.117657	-0.220474	-0.337339	-0.296152	-0.478133	-0.509974	0.0914307	0.129236	0.0570593	0.0535946	-0.0313368	0.0478201
AVP	0.0612712	0.333129	0.0797048	0.0166903	-0.185372	0.491097	-0.00446367	-0.0392537	-0.0057683	-0.32257	-0.189141	0.0148153	-0.0407009	0.161536	0.113943	0.0614767	-0.0721202	0.186666	-0.12985	-0.071703	-0.247126	0.0530601	0.0519352	-0.115933	0.055191	-0.0997052	0.110723	0.0611424	0.176418	0.133808	0.0162611	0.123256	0.0594893	0.300516	-0.105512	-0.0489311	-0.11397	0.0753646	0.14884	0.0256829	-0.150175	-0.116703	-0.0207357	-0.0949235	-0.141825	-0.0349484	-0.0894985	-0.18375	-0.106655
AVPR1A	-0.857074	0.195853	0.115775	-0.00428343	-0.0568943	0.0403295	-0.537827	-0.0272555	0.21526	1.43396	0.698164	0.10335	-0.850342	0.416353	0.577196	-0.154469	-1.65456	-0.400817	0	-0.171054	-0.538763	-0.55826	-0.306805	-0.344401	-0.77241	-1.04704	0.102463	-0.338385	-0.584882	-0.202025	-0.581643	0.136016	-1.11765	-0.418872	0.0608463	0.310394	0.194254	0.185429	1.02035	-0.108442	0.926091	0.360812	0.118749	0.20214	0.322213	0.4256	-0.154901	-0.941304	-0.557641
AVPR1B	-0.104537	0.231167	-0.0546751	0.0134716	0.0173459	0.203782	-0.118349	0.131365	0.188188	0.00781393	0.151803	-0.000239	0.152571	-0.0564814	0.146591	0.239573	-0.0331554	-0.0143085	0.140338	-0.0403213	0.0100865	0.00781393	-0.00916624	0.0201664	-0.11605	0.00903225	-0.023221	0.00828123	0.00761032	0.151819	0.313117	-0.199699	0.122527	-0.0436563	-0.0568209	-0.0230241	-0.0193787	0.151017	0.260904	0.0416236	0.0829444	0.235029	-0.0422363	0.0690947	-0.125427	-0.126572	-0.162392	-0.0470724	-0.00630522
AVPR2	0.0321155	0.156197	0.0314565	-0.054203	-0.080409	0.494932	0.190581	-0.0150013	0.289196	-0.0581284	0.120352	0.0740519	-0.0365725	-0.105811	-0.104889	0.0284805	-0.0181961	-0.0944457	-0.0999694	-0.349733	-0.154334	0.0556464	-0.134909	-0.125938	0.00264025	-0.0544186	-0.00528431	0.176489	-0.137534	-0.191191	0.179009	-0.169554	0.108828	0.058589	-0.176925	-0.148891	0.183673	0.335448	0.00893784	0.184076	0.19858	0.185021	0.0835376	0.00171661	-0.0896578	-0.157504	-0.0432811	-0.0417929	-0.178609
AXL	0.0607429	0.406486	0.26933	0.0211539	-0.211663	0.0749068	0.191115	-0.323342	-0.138577	-0.0537496	-0.464753	-0.232655	0.200209	0.397776	0.403454	0.298935	0.26097	0.212532	-0.0734229	-0.0670972	0.196727	0.225358	0.18323	0.0941162	-0.16449	0.124016	0.0452137	0.29132	0.150492	-0.196557	0.212305	0.215253	-0.186264	0.0734186	-0.165205	-0.0536237	-0.194297	0.0538616	-0.158771	-0.0436492	-0.0400548	0.133378	-0.153349	0.184842	0.371809	0.455114	-0.0919585	0.00766611	0.0813499
AZGP1	0.184013	0.160679	0.133947	-0.0825834	0.344154	-0.127363	0.434229	0.345172	0.185027	0.250644	0.0809832	0.0692072	-0.0598335	-0.162014	-0.110832	0.0269022	-0.142097	-0.0116186	0.205828	-0.385406	0.0545006	-0.541793	-0.780696	-0.0816526	-0.187432	0.073698	-0.0855465	-0.171832	-0.0900345	-0.292446	-0.731217	-0.101438	-0.230677	-0.296396	0.0436993	-0.18174	0.242225	0.160836	0.2911	0.312761	-0.00176525	0.102139	0.276138	-0.0830479	-0.242952	0.231157	-0.102106	-0.487048	-0.117734
AZU1	-0.012126	0.372985	-0.165074	0.0629911	-0.0505414	0.696199	0.00172901	-0.0467091	-0.0116663	-0.205686	0.0890174	0.0548215	-0.107999	0.0370941	0.294771	0.0868192	-0.059442	0.120489	-0.0641756	-0.169425	-0.177175	-0.00512791	-0.183115	-0.222197	0.0227332	-0.240152	-0.031714	-0.122454	0.115495	-0.162992	0.00158358	0.156293	0.105403	0.150951	0.0257354	0.17099	-0.131888	-0.142226	0.0914102	0.260426	0.0876274	0.091917	0.0986686	-0.193233	-0.205101	-0.148205	-0.140919	-0.242385	-0.0413055
B2M	0.0205688	-0.224127	0.146396	-0.0890636	0.342288	0.201381	0.250516	0.702318	0.394211	0.44052	0.574686	0.439372	-0.474156	-0.564711	-0.61414	-0.623192	-0.689161	-0.696323	0.503896	-0.1277	-0.0589113	-0.0651178	-0.59165	-0.250623	-0.0554857	-0.146216	-0.336495	-0.338905	-0.657868	-0.294089	-0.565004	-0.0608034	-0.0222445	-0.044219	-0.162471	-0.36992	0.0713882	0.0207233	0.200511	0.34808	0.0733089	0.499471	0.477053	-0.224351	0.287522	0.167096	-0.0907955	-0.260958	-0.6482
BAAT	0.344479	0.717458	0.22231	-0.370716	0.379201	0.509444	0.451799	-0.0457935	-0.325957	-0.395724	0.304576	0.415815	0.0375204	0.0358381	-0.0139141	-0.510914	-0.280043	0.303197	0.0990543	-0.293645	-0.265445	-0.641624	-0.519329	0.0194559	-0.391384	-0.0377293	-0.453236	-0.428311	-0.141994	-0.11759	-1.09644	-0.107639	-0.392134	0.154549	0.224254	-0.153509	0.397886	0.252568	0.254515	0.375696	-0.372808	0.146831	0.0472879	-0.146792	-1.03505	0.445631	-0.492046	-0.792088	-0.0211172
BACH1	-0.0667572	0.0151434	-0.137553	-0.290727	0.292006	0.130195	-0.112528	0.131848	0.444458	0.450711	0.492533	0.454865	0.410239	-0.00819349	-0.0788631	-0.0432715	-0.050909	-0.196355	0.1897	-0.138124	-0.277853	-0.0689125	0.029036	0.0121942	-0.0867753	-0.141218	-0.341955	0.00330782	-0.0614505	0.059638	-0.390241	-0.285372	-0.23811	-0.112552	0.143103	-0.238514	0.0614705	0.36906	0.257767	0.138961	0.283283	0.16522	0.116447	-0.136285	-0.0237522	0.229756	-0.152261	0.156192	-0.288711
BAD	0.233467	0.391861	0.290976	0.429523	-0.11437	-0.00765467	-0.138637	-0.216212	-0.266347	-0.37105	-0.217154	-0.341228	-0.194057	-0.175474	-0.187329	-0.259395	-0.029942	-0.286042	-0.23004	0.125993	0.127233	0.24998	0.0964298	0.197953	-0.210773	0.125449	0.222224	0.258644	0.24696	0.285374	0.173763	0.154142	0.215004	0.180626	0.233431	0.42801	-0.141085	-0.29439	-0.205753	-0.245776	-0.172402	-0.14999	-0.254997	0.0840492	0.153716	0.231838	-0.0336156	0.0569577	0.234222
BAG1	0.0907927	0.104034	-0.118109	0.0914087	-0.0595417	0.098494	0.00869751	0.193701	-0.0687447	0.0901279	0.0616069	-0.0265594	-0.220341	-0.206621	-0.0660467	-0.258185	1.22412	-0.327255	0.0513158	-0.0741272	0.0253353	-0.109111	-0.402529	0.0111728	0.00536251	-0.00882626	0.0288692	-0.0897098	-0.245449	-0.0641398	-0.0551701	0.0380506	0.0186973	-0.10419	0.310922	-0.115132	-0.0438347	-0.103331	-0.0204101	-0.0168872	-0.0851464	0.00339889	0.0863438	-0.0659952	-0.180645	0.118726	-0.0480318	0.0188398	-0.0348473
ADGRB1	-0.137653	0.111651	-0.0310612	-0.0320773	-0.0634217	0.210637	-0.110134	0.0525613	0.0101132	-0.19046	-0.0579333	0.0379925	0.0964975	-0.0944915	0.0469475	-0.0524034	0.0265813	-0.0433865	-0.0925198	-0.12717	-0.192433	0.0253181	0.324093	-0.141262	-0.000874	-0.129551	-0.0885916	-0.0183229	-0.069273	0.173597	0.0508962	-0.0807056	0.108032	0.195774	-0.0056119	-0.0853348	-0.0770593	-0.0684724	0.0425987	0.094944	-0.0443053	0.208008	0.146777	-0.214857	-0.0955777	-0.253669	-0.324009	0.0838852	-0.0476599
ADGRB2	-0.225827	-0.0125322	-0.0966539	-0.00957346	0.058372	0.283049	0.0216985	0.00274038	0.346443	-0.139848	-0.0153265	-0.102682	0.108196	0.0348911	-0.0398865	0.0153222	0.0888376	0.0139856	-0.130059	0.0160031	0	0.16507	0.244479	-0.202187	0.172551	-0.0534887	0.06461	-0.108805	0.368078	0.304108	0.29094	0.157051	0.0226636	0.182922	-0.109943	0.00453758	0.00174761	-0.189319	0.119142	0.0308418	0.0377975	0.0801106	-0.0231175	0.0815892	-0.123435	-0.0398746	-0.105927	-0.0464849	0.0495591
ADGRB3	-0.122639	-0.287135	-0.0946546	0.00148821	-0.00936222	0.262621	-0.163111	0.00148821	-0.00473929	0.317505	-0.0533276	0.0342722	0.291977	0.05617	-0.19001	0.087234	0.029407	-0.260475	-0.0197701	0.279107	-0.0756164	-0.0469561	-0.185102	0.0445161	0.084249	0.115506	0.0519948	0.316983	-0.108693	0.153474	0.250998	0.0176544	-0.143642	-0.321838	-0.0835133	-0.093226	-0.0390348	0.00148821	0.0221634	0.0420566	0.103915	0.14182	0.183092	0.0226803	0.178637	0.23083	-0.030149	0.152775	-0.0080657
BAK1	0.2493	0.31817	-0.0702577	-0.0589747	0.0333371	-0.330342	-0.233873	-0.0282245	-0.458763	-0.127464	-0.429749	-0.0787954	-0.240544	-0.0696397	0	0.418764	-0.315206	-0.055645	0.0667705	-0.220387	0.065268	0.190689	-0.569896	0.338331	0.154214	-0.0270567	0.258896	0.215146	0.141457	0.106964	0.0980096	0.184781	0.0782618	0.297303	-0.314999	0.126756	-0.0746369	-0.156529	-0.162408	0.102743	-0.0508656	-0.00262213	0.116804	0.0142107	0.201523	-0.277783	0.211691	-0.241099	0.235899
NKX3-2	-0.036808	0.400254	-0.0241981	-0.107206	0.110772	0.525081	-0.0471921	0.11983	0.348465	-0.110783	-0.030364	-0.00543404	0.0099802	0.0436296	0.196972	0.125966	0.136456	-0.0748777	-0.153602	0.0204921	-0.192435	-0.119287	0.314006	-0.0107403	-0.0815344	-0.170567	0.00445366	0.27137	0.0455546	0.052793	0.195332	-0.151	-0.0690718	0.113416	0.0249977	-0.0192704	-0.129861	-0.136282	0.0645351	0.08744	-0.0814939	0.0955172	0.154037	0.0739818	-0.102194	-0.167475	-0.162086	-0.203441	-0.0809593
BARD1	-0.164775	0.0913105	0.0202804	-0.137834	0.130926	-0.292437	-0.217021	-0.0851817	-0.105206	0.072669	-0.202618	-0.0136538	-0.104829	0.247721	-0.431273	-0.0509634	0.229098	-0.0959277	0.0686102	0.020545	0.00751162	0.00200415	-0.200348	-0.094471	0.135409	-0.218096	0.0154834	-0.0724883	0.215224	0.197817	0.0194664	-0.0726109	-0.0807986	-0.189322	-0.192529	-0.00226545	-0.0840754	0.0514169	-0.329511	0.02843	-0.166567	-0.0727401	-0.0854859	-0.289285	-0.0179811	0.0924764	-0.178567	0.0656314	-0.138759
BAX	0.186652	0.25303	0.136319	0.0574741	-0.313585	-0.0732012	-0.186733	-0.0326581	-0.149323	-0.358869	-0.372634	-0.215766	-0.198596	-0.368072	-0.212732	0.0075531	-0.253984	-0.155948	-0.271916	0.245485	0.0653839	0.2189	0.558735	0.0868626	0.00698471	0.148668	0.271956	0.269617	0.179785	0.376451	0.352118	0.0531321	0.136506	0.160535	0.192177	0.25164	-0.0693755	-0.260579	-0.0202098	-0.193229	-0.273992	-0.15677	-0.218862	0.160508	0.0924974	0	0.210576	0.340621	0.262339
BBS1	-0.0263481	-0.00314045	0.0771985	-0.0567141	-0.087595	0.0347548	-0.117939	-0.208372	-0.194464	-0.340786	-0.428357	-0.126551	0.0041132	0.239163	-0.0540557	0.336658	0.326239	0.270088	-0.00314045	-0.142063	0.221196	-0.0619359	0.277797	0.0795441	0.049901	0.19301	0.0881114	-0.0865569	0.398915	0.118556	-0.234076	0.133074	-0.112401	-0.18087	-0.0865231	-0.135926	-0.080481	-0.171302	-0.296988	0.168812	0.00858641	-0.236985	-0.0160117	-0.145471	-0.2718	0.132	0.113904	0.102454	0.120805
BBS2	-0.0698614	-0.128755	-0.00236988	-0.14651	0.161865	0.0248628	-0.0480208	-0.0667419	0.055429	0.182885	0.129694	-0.329475	0.0763454	0.16304	-0.0182419	-0.386035	0.0343084	0.272253	0.049953	-0.203158	0.211464	-0.0231042	-0.0968852	0.27297	0.146872	-0.0146556	-0.185263	0.0785565	0.253849	0.138024	0.0192122	-0.0614934	-0.452681	-0.375586	0.101778	-0.134837	0.183218	0.175772	-0.0305409	0.170337	0.23576	0.0585246	0.0147796	0.10223	-0.0207458	0.305984	-0.0719266	-0.083663	-0.0904722
BBS4	0.125279	-0.0388227	-0.163376	-0.0867104	0.170289	-0.439537	0.13561	0.202156	0.127543	0.204365	0.33008	0.192098	0.112035	-0.386734	-0.197148	0.0390968	0.0798502	0.16276	0.0524621	-0.166881	0.079855	-0.149391	-0.391408	-0.213231	0.0233583	-0.0113463	-0.299076	-0.274232	-0.370018	-0.0306158	-0.327939	-0.177414	-0.295934	-0.0508084	-0.0845737	-0.0558867	0.0655165	0.296593	0.165499	0.342161	0.110133	0.225932	0.272701	-0.165772	-0.086288	-0.0298715	0.0694952	0	-0.612831
BCAT1	-0.219452	0.0825439	0.182679	-0.17434	-0.0536904	0.195502	-0.0940485	-0.0817633	0.0264993	-0.2314	0.0668507	-0.136413	-0.188629	-0.0600977	-0.176026	-0.261475	-0.152829	0.0747981	-0.005651	0.0418749	-0.0164847	-0.0741043	0.0231934	-0.305327	0.0624599	-0.038825	-0.077014	0.0597734	0.118469	0.0502954	-0.0322733	-0.0726824	0.0933738	0.0372548	-0.1521	-0.097271	-0.154293	-0.0976553	0.0819483	-0.034687	-0.0189834	0.117865	-0.00268602	-0.083653	0.267785	-0.0676703	0.106212	-0.181232	0.00568581
BCAT2	0.114773	0.294307	-0.040689	-0.0738244	0.038877	-0.101129	0.0745335	-0.103096	-0.12225	-0.291666	-0.178577	-0.0920868	0.0586543	-0.00414181	0.151158	0.0207281	-0.0496569	-0.380579	-0.389007	0.00541496	0.331841	0.0207281	-0.183648	0.099658	-0.38946	0.0789657	0.0806003	0.299603	0.688403	0.122313	-0.0289397	-0.142011	0.108903	0.166093	0.132375	0.127687	-0.118639	-0.0593615	-0.0427346	-0.0645299	-0.15231	-0.0574017	-0.308636	0.201543	-0.0480642	0.291971	-0.0734005	0.0207281	0.169839
BCHE	0.0601816	-0.639271	-0.517098	-0.209923	0.60327	-0.728219	0.246355	0.782813	0.596845	0.697529	1.03805	0.453168	0.174394	-0.130419	-0.46495	-0.16641	0.0679779	-0.12903	0.126292	-0.582871	-0.348858	-0.13479	-1.0639	-0.290107	0.067564	-0.67884	-0.354959	-0.437706	-1.04608	-0.421581	-1.47092	-0.325301	0.140722	-0.585226	0.243582	0.301672	0.715652	0.197329	0.343634	-0.317598	0.211359	0.557895	0.565846	0.190537	-0.402768	0.0605564	-0.263478	-0.343057	-0.554646
BCKDHA	0.203715	0.177089	-0.0722809	0.0343466	0.113781	-0.541848	0.116462	-0.110991	-0.43688	0.0156918	0.00735187	-0.212132	-0.0231771	-0.134066	0.0431271	0.0368433	-0.0843306	-0.0321236	0.0307531	-0.232266	0.184033	-0.433435	-0.650331	0.0670023	-0.0589476	0.132726	0.132957	0.00380325	-0.119899	-0.266855	-0.464168	0.265726	-0.346178	0.0116453	0.16221	0.0266457	0.289725	0.0227938	-0.0252733	0.115723	-0.0842285	-0.232368	-0.207666	0.149128	-0.0459671	0.211167	0.0521975	-0.459796	0.0385046
BCKDHB	0.225944	-0.179875	0.02666	0.0869112	0.25452	-0.163876	-0.0453053	0.33981	0.0853939	0.524618	0.284863	0.136512	0.385629	0.278641	0.221286	0.213703	0.178466	0.387339	0.0788002	-0.375869	0.323402	-0.365077	-0.998906	0.0524139	-0.132407	-0.397752	-0.125896	-0.44115	0.112925	-0.438051	-0.823741	-0.200706	-0.353184	-0.16458	-0.0762405	-0.0394344	0.17793	-0.0167131	0.234199	0.155113	0.159991	0.0295982	-0.0952015	0.211256	-0.0161295	-0.0751047	-0.122506	-0.222389	-0.553863
CCND1	-0.180918	-0.250652	-0.31433	-0.193409	0.232143	-0.135988	0.0355663	0.104875	-0.0453939	-0.181082	-0.177173	-0.180538	0.0974865	-0.0544038	0	0.767703	-0.0558672	-0.0852499	0.437267	0.250324	0.150665	0.0154696	-0.083673	0.0284204	0.0201063	0.358744	-0.114138	0.166994	-0.423219	-0.11212	0.161386	-0.0842052	-0.116999	-0.0731301	-0.429699	0.0982285	-0.0363021	0.218959	-0.366709	0.10212	0.107437	0.213849	-0.0157843	-0.1753	0.356321	-0.110558	-0.250913	-0.153882	0.320251
BCL2	-0.0895543	0.153059	-0.0529742	-0.180598	-0.0799293	0.13422	0.0116253	-0.0572834	0.127811	-0.00481081	-0.0180755	0.0824685	0.13858	0.594399	0.146656	0.205708	0.342267	0.130629	-0.0473218	-0.0304856	0.124424	0.0265365	0.0385113	-0.0222139	0.0620198	-0.0333042	0.159442	0.162313	0.22218	0.0592413	0.00992155	0.239442	-0.0157757	0.101488	-0.213205	0	-0.22729	0.044951	-0.115882	0.0928836	0.212152	0.248589	0.0628638	0.0176063	0.0891724	0.00882006	7.96e-05	-0.0333762	0.0920157
BCL2A1	-0.153006	0.097609	0.148072	-0.170179	0.0798187	0.129397	0.10376	-0.117303	0.0228405	0.197302	0.105992	-0.163862	0.0297756	-0.0927629	0.111083	-0.0838795	0.0370946	-0.0881543	0.0807552	0.0948286	-0.197336	0.00611401	0.0515161	-0.00982428	-0.180299	-0.172622	-0.0378332	-0.248052	-0.0577579	0.121524	0.0642204	-0.269429	-0.0755973	-0.238425	-0.128775	-0.158219	0.110415	0.0646934	-0.108432	0.00688505	0.163141	-0.176965	0.00878859	-0.343105	-0.0606174	-0.055203	-0.00283098	0.011446	-0.22487
BCL2L1	0.0493898	-0.329321	-0.149135	0.215329	0.0266156	-0.158502	-0.0464563	-0.194304	-0.248623	-0.115148	-0.257272	-0.27042	0.165575	-0.0944357	0.206722	0.325078	0.026	0.279437	0	-0.0449929	0.252015	-0.305723	-0.0486398	0.11873	0.0368671	0.278852	0.122925	0.138187	-0.000834	-0.203278	0.0107193	0.0600591	-0.171911	0.0705543	-0.118938	-0.00500536	0.251483	0.123403	0.0892539	-0.0488191	-0.00420141	-0.255778	-0.222876	0.153212	0.519566	0.363875	-0.0611095	0.109727	-0.00640965
BCL3	-0.222651	0.190207	0.0298948	0.107836	-0.036624	0.346277	0.0128741	-0.13407	0.0397234	-0.0590515	-0.261532	-0.266274	0.336261	0.246568	0.549018	0.45327	0.679959	0.50459	-0.195504	0.0275288	0.329121	0.150529	-0.150769	0.0103359	0.114861	0.00816727	-0.0811925	0.133622	-0.438136	0.0234151	0.411662	0.130335	0.0613732	0.0202274	-0.103542	-0.226586	-0.283029	-0.106071	-0.0038743	-0.0834007	-0.0263376	-0.200226	-0.196248	-0.0917954	0.0860558	-0.103671	0.0798397	-0.0429125	0.0557675
BCL6	-0.361036	0.402914	0.253607	0.0114374	-0.0139961	0.186504	0.240995	0.325328	0.037847	0.437867	0.117713	0.214697	0.0690222	0.518853	0.604275	0.176345	0.809153	0.624405	0.319155	-0.103483	-0.447574	0.0937829	-0.684364	-0.285731	-0.239302	0.267175	-0.327669	0.158327	-0.105747	-0.0912628	-0.215914	0.384552	-0.0928006	-0.630902	-0.262146	-0.299196	0.459123	0.0495019	-0.151441	0.308629	0.170623	-0.266369	-0.103369	0.201969	-0.0981312	0.654569	0.0342412	-0.334219	0
BCL7A	0.297358	0.170225	0.210762	0.249121	-0.206623	-0.106562	-0.303546	-0.290268	-0.187061	-0.220142	-0.169528	0.0217533	-0.219128	-0.357991	-0.25827	-0.45819	-0.249602	-0.552381	0.0211973	0.4312	-0.21895	0.207845	0.359369	0.245117	0.219717	-0.126424	0.232712	0.257379	0.155555	0.371326	0.248238	0.0788016	0.0748024	0.0250106	0.222974	0.225351	-0.339712	-0.171938	-0.206994	-0.276066	-0.168723	-0.0266318	0.0765295	0.0418482	0.0614896	-0.0979271	-0.0377331	0.324188	0.367224
BCL9	-0.238375	0.0712953	-0.0223475	-0.0430756	-0.293209	0.126596	-0.106233	-0.310205	-0.33178	-0.168072	-0.140506	-0.180237	0.11698	0.179182	0.164748	0.469525	0.176505	0.148489	-0.258593	0.347886	-0.0298066	-0.155932	0.42969	-0.0173359	0.192381	0.371502	-0.0671592	0.132719	0.0711141	-0.15656	0.248924	-0.155245	-0.00123835	0.0674624	0.117534	-0.308941	-0.349888	0.0334067	-0.0723648	-0.164508	-0.0113254	-0.135805	-0.231722	-0.0432854	0.0251503	0.298508	0.0798979	0.0835652	0.296095
TNFRSF17	0.144028	-0.114753	-0.0456333	-0.0357885	-0.0511584	-0.114628	0.0515623	0.0231247	0.0723634	-0.11024	-0.0444751	-0.00465632	0.0890269	0.00902939	-0.0638313	-0.0139627	-0.0320668	0.102904	-0.037663	0.0237341	-0.0254402	0.0928822	0.190223	0.194411	-0.0956874	-0.0195403	0.177567	0.026628	0.509609	0.158997	0.141975	0.0306764	0.124633	0.128023	-0.0802598	0.133042	-0.143139	-0.0667262	0.0182004	0.00197268	-0.171879	0.0427313	-0.111918	0.0299444	0.21245	0.0207829	0.138102	-0.0456109	-0.0594001
HCN2	-0.000972	0.387102	-0.178199	-0.0723739	-0.0493889	0.559614	-0.0781441	0.238911	0.232925	-0.242095	0.0837474	0.0213251	-0.0575819	0.343923	0.302831	0.130223	0.167276	-0.0556087	-0.0303941	-0.247743	-0.379424	-0.0190716	0.386948	-0.287292	0.0341449	-0.120973	-0.131906	0.263578	-0.0835624	0.0237417	-0.0649457	0	0.116735	0.3856	0.036767	0.0535507	-0.100307	0.187579	-0.0533338	0.255472	0.135709	0.293345	0.057941	-0.188885	-0.202353	-0.315575	-0.366524	-0.304533	0.00052
OPN1SW	-0.0354152	-0.161107	0.102206	0.0223269	-0.0159769	0.05551	0.087687	-0.102934	0.0126677	-0.127143	0.0486779	0.06528	-0.00139618	0.281323	0.138945	0.146555	0.253702	0.0588179	-0.0562153	0.0164714	-0.245566	-0.205476	-0.0370274	-0.233685	0.0375099	4.15e-05	0.0280366	-0.126446	0.0805869	0.10941	0.0977812	-0.227143	-0.0243816	-0.0866947	-0.185112	-0.0516691	0.0599799	0.0369654	-0.119641	0.0131578	0.0473828	0.127412	-0.0582614	-0.031672	-0.0997753	-0.135511	-0.0620222	-0.0600762	0.00251436
BCR	0	-0.0449843	0.0101128	-0.133521	0.0125976	0.222642	0.0756984	-0.115092	0.156497	-0.119705	-0.203477	-0.0549169	0.0653529	0.282288	0.407052	0.270133	0.22828	0.401359	-0.185263	0.339303	0.263123	-0.266815	0.113961	-0.0524368	-0.0650678	0.489027	0.131321	0.213827	0.180239	-0.10375	0.314481	0.231606	-0.0749302	0.108487	-0.0345087	-0.150293	-0.160022	-0.0544753	-0.0818539	-0.163477	-0.0891099	-0.124854	-0.232666	0.194982	0.197637	0.111833	-0.178866	-0.182136	0.020823
BCS1L	0.0895829	0.0486131	-0.280516	0.108154	-0.0512643	-0.465795	-0.318174	-0.384961	-0.199954	-0.346073	-0.263764	-0.189109	-0.18963	-0.172109	-0.571781	-0.350544	-0.158271	-0.225178	0.00922966	0.0235167	0.208853	0.0101676	-0.261772	0.123223	0.120233	0.369543	-0.190595	0.272171	-0.138068	0.109747	-0.176177	-0.0356541	-0.0449834	-0.107421	0.252265	0.0237966	-0.0303564	-0.0348191	0.0392256	-0.297802	-0.00567341	-0.217948	-0.111987	0.0557451	-0.157687	0.0814762	0.238942	0.107283	-0.0647597
BDH1	0.113058	-0.0431061	-0.290269	-0.213693	0.414932	0.123599	0.253157	0.177063	0.297603	0.337319	0.351629	0.237804	0.0247421	-0.195095	0.104446	0.145589	0.200492	-0.310032	0.0416937	-0.254909	-0.00943088	-0.406781	-0.171917	-0.263146	0.216167	0.253849	-0.190207	-0.091239	0.12878	-0.460887	0.0432396	0.0323534	-0.223377	-0.138111	0.114392	-0.191998	0.274923	0.617848	0.284469	0.300228	0.101083	0.0492163	-0.0830317	0.266297	-0.243557	0.154447	-0.13816	-0.255365	0.210361
BDKRB1	-0.0146918	0.126363	0.0688887	0.16791	-0.207934	0.0414791	-0.108628	-0.117202	0.223385	-0.0610194	0.0192771	0.0511279	0.253986	-0.00626469	-0.013885	0.0346098	0.012044	-0.120019	-0.0844226	0.00441361	-0.0853462	0.00383902	-0.0959773	-0.28993	0.330478	-0.130564	-0.0422282	0.133981	0.124255	-0.0155497	0.114517	0.00583935	0.42692	0.250967	-0.0705967	0.226205	0.0906696	0.223985	-0.204357	-0.368105	-0.0907474	-0.153184	-0.113781	0.192838	0.0838561	0.000539	-0.0887094	0.314553	0
BDKRB2	0.122321	0.206072	-0.0245199	-0.0831499	0.077426	0.40163	0.028625	-0.147071	0.0766191	-0.142819	0.101625	-0.0545912	0.0825243	-0.0104799	0.144958	0.129733	-0.315882	-0.171613	-0.0304317	-0.0556216	-0.049253	-0.125705	0.154675	-0.0394917	0.0912914	-0.0617933	-0.202117	-0.0366936	0.201353	-0.145872	0.258244	0.0661621	0.0917373	-0.164925	-0.0593929	0.0161591	0.3259	0.234189	0.161272	0.0923591	0.260501	0.383872	0	0.165386	-0.196238	-0.11895	0	0.0356536	-0.179873
BDNF	-0.0635042	0.0661511	0.0153885	-0.0377283	0.0665283	0.0471439	0.050653	-0.129909	0.0328426	-0.246025	-0.127666	-0.1345	-0.0824375	0.0735669	0.171856	0.185089	0.119586	0.0632558	-0.0556788	-0.0459275	-0.129314	-0.00898647	0.169308	0.0294757	-0.0682144	-0.184762	-0.00795793	0.309274	0.120535	0.043788	0.267851	0.0538425	-0.0715427	0.123824	0.021203	0.0146742	-0.00547886	0.0236711	0.078485	-0.070662	0.031393	0.0217671	0.0648956	-0.1005	-0.0177388	0.00106287	0.192739	-0.0550346	-0.0453258
CFB	-0.0598478	0.0149298	0.275284	0.0268259	0.330427	0	0.134133	0.324249	0.0303364	0.512978	0.256161	0.0297766	-0.0673284	-0.198756	-0.064558	-0.00540161	0.0882244	-0.216582	0.315275	-0.30477	0.0686932	-0.394067	-0.563051	-0.269864	-0.189571	-0.125408	-0.407618	-0.048727	-0.209782	-0.402149	-0.525879	0.0707083	-0.130003	-0.15619	-0.421818	-0.274925	0.29566	0.280984	0.42015	0.424624	0.168785	0.37019	0.206337	-0.23334	-0.0823793	0.135847	-0.031373	-0.672254	-0.348663
BFSP1	0.13475	-0.120113	0.0373096	0.0755334	-0.189097	0.0627313	-0.129967	0.0246792	0.0227966	-0.186718	0.0235991	-0.0305796	-0.139923	-0.163754	-0.121904	-0.101149	0.140532	0.0789661	-0.125261	-0.0118413	-0.077569	0.129253	0.156404	0.136366	-0.0568743	0.124748	0.114424	0.0103106	0.0571456	0.170931	-0.00580358	-0.0446768	-0.0960388	0.233704	0.0246754	0.284887	0.0597997	0	0.00990582	-0.0282383	0.0339179	0.048974	0.0524073	0.0515776	-0.0423422	0.0665345	-0.207851	-0.149941	-0.00596714
BGN	-0.220854	0.498777	-0.284359	-0.217054	-0.16739	0.217069	-0.099802	-0.385351	-0.376295	-0.132685	-0.358919	-0.537765	0.351894	0.75131	0.498071	0.339711	0.363829	-0.021513	-0.38668	0.400864	0.313964	-0.416287	0.239625	0.0421982	-0.135942	0.506587	0.0703669	0.351884	0.525873	-0.0117836	0.0451975	0.357914	-0.00801945	-0.262815	0.11214	-0.108606	-0.512216	0.195946	-0.21126	-0.22171	-0.0379181	-0.0727119	-0.246	0.328609	0.199721	0.480409	-0.17573	0.182705	0.6634
CEACAM1	0.0362201	-0.0793848	-0.419439	0.14809	0.308704	0.463713	0.145307	0.413601	0.0225673	0.0994334	0.124215	0.222438	0.505584	0.648401	0.252741	0.39303	0.577444	0.317324	0.278663	-0.328706	-0.00749874	-0.163606	-0.351416	-0.0593419	-0.285282	-0.0848022	-0.0753522	0.00573635	-0.131003	-0.0672336	-0.589567	-0.286324	0.0287266	-0.00259018	-0.465862	-0.187051	-0.021687	0.208584	0.203188	0.350456	0.12736	-0.0370154	0	-0.32454	-0.1818	-0.0196624	-0.126571	-0.430178	-0.223
BHMT	0.0994434	0.048316	-0.307231	-0.501826	0.0902653	0.394976	0.708922	-0.0770521	0.719552	-0.00717259	-0.125648	-0.0283728	-0.332229	0.0810118	0.59901	-0.422597	0.111447	-0.0846729	-0.173455	-0.461664	-0.114766	-0.727027	-0.585007	-0.0526552	-0.10779	-0.168499	-0.542092	-0.0227308	0.109632	-0.753984	-0.328473	0.00652409	-0.611579	-0.266401	0.214431	-0.100909	0.57141	0.297282	0.54861	0.107011	0.0614462	0.10686	0.386987	0.635282	-0.636004	0.593972	-0.830537	-0.564543	0.102038
BICD1	-0.0980949	-0.0442357	0.124139	-0.215436	0.0255384	0.25419	0.106714	-0.180974	0.111171	0.00703192	0.0898147	-0.0133352	-0.170487	0.0372658	-0.0798297	0.0130739	0.0047431	-0.381104	0.00379705	0.24442	-0.0378418	-0.0374732	0.49803	-0.0814099	0.236374	0.19901	0.195759	0.0482955	0.0744052	0.293579	0.0684466	0.0231314	0.329596	0.144406	-0.160197	-0.0539651	-0.180088	-0.219546	0.0275536	0.0849504	-0.204343	-0.0221205	0	0.146903	0.179867	0.208702	-0.106314	0.242476	0.2533
BID	0.353036	0.14417	0.166474	0.000524	0.249308	0.143931	0.0354714	0.420675	0.134064	-0.112894	0.196911	0.263913	-0.146747	-0.205036	-0.36764	0.0172606	-0.2949	-0.118836	0.212641	-0.203271	-0.0505581	-0.367211	-0.200026	-0.000329	-0.1391	0.176257	0.143509	-0.362698	-0.17789	-0.0901532	-0.296963	-0.11942	-0.0146298	0.154296	0.0174589	-0.00249243	-0.0151267	0.138946	-0.178116	0.363914	0.00560999	0.0510364	-0.125338	0.0206938	-0.211784	-0.202011	0.0643372	-0.319361	-0.0455017
BIK	0.111794	-0.0111065	-0.134736	0.098341	-0.200518	0.11464	0.0570674	-0.187371	-0.183722	-0.179098	-0.00725889	-0.0679488	0.138448	0.189195	0.145143	0.0144238	0.0196729	0.285324	-0.284493	0.105333	-0.0357151	0.101974	0.317956	0.0897112	0.0390606	-0.0463371	0.301815	0.113678	0.40557	0.113523	0.483957	0.101223	0.0614371	0.0186243	-0.135089	0.00458527	-0.224674	-0.127577	-0.119704	-0.0586033	-0.0216508	-0.201884	-0.189812	-0.00752544	-0.0161514	0.167103	0.0341558	-0.0549116	0.115915
PRDM1	-0.0108247	0.551826	0.523455	-0.140322	-0.28752	0.272405	0.542019	0.284697	-0.0893598	0.177995	-0.0432467	0.0587072	-0.0836015	0.979101	-0.115662	0.0918722	-0.102624	0.243341	0.119188	-0.0243516	-0.203292	-0.00697422	-0.123785	-0.203979	-0.176699	0.037787	-0.191221	-0.162131	0.519938	0.204488	0.147359	0.502559	0.0433154	0.0159225	-0.0518975	-0.13984	0.351122	-0.171736	-0.438993	0.135973	-0.122391	0.259774	-0.12239	-0.179159	0.17155	0.617318	0.0471644	-0.15775	0.171567
BLK	0.0344877	0.319979	-0.00205755	0.172524	-0.134189	0.193442	-0.102092	0.170712	-0.000356	-0.0143657	-0.16465	-9.25e-05	-0.442137	-0.178537	0.182365	-0.312957	-0.104356	0.105399	0.0541201	-0.202703	0.0429282	-0.178226	-0.46398	0.211803	0.0713687	0.0626063	-0.182326	0.168792	0.290729	0.276827	0.188569	0.277219	-0.0449543	0.0627632	-0.000356	-0.123239	0.0293317	-0.0348454	0.00541401	0.25696	-0.0239167	0.118302	0.0590072	-0.036756	-0.127845	-0.086555	-0.252837	0.0523596	0.080194
BLM	0.0165896	0.124815	-0.174463	0.0850415	-0.0786233	-0.0591965	0.0109429	0.243494	-0.00893497	-0.0237904	-0.0283074	0.174654	-0.0441842	-0.118564	-0.0868421	-0.0700383	0.0280566	-0.0662708	0.314692	0.00769424	-0.0851207	-0.130892	0.034833	-0.170201	-0.0464644	0.0248189	-0.0535183	-0.061449	-0.128745	-0.0066185	0.0898757	-0.0465088	-0.0031023	-0.0693369	-0.0115046	-0.0362554	0.109215	0.205113	0.0162973	0.066628	-0.137492	0.0823526	-0.039278	-0.0763717	-0.0713167	0.00402832	-0.0513234	0.00380898	-0.140691
BLMH	-0.040092	-0.124674	-0.198062	-0.141572	0.0622926	-0.186264	-0.402539	-0.264257	0.0595393	0.0396852	-0.110651	0.213855	0.218395	0	0.143361	0.115706	-0.192747	-0.155907	0.141692	0.0971913	-0.113725	0.00600767	-0.255066	-0.101644	0.153226	0.424879	-0.292716	-0.130691	-0.0272651	0.107133	-0.298446	-0.153457	-0.216791	-0.491233	-0.146594	-0.429107	0.0708971	0.165915	0.147906	0.261964	-0.29224	0.156801	0.0719376	-0.0220437	-0.097394	0.479089	-0.254201	-0.306118	0.186562
CXCR5	-0.00423574	-0.0304294	0.0745611	0.0459657	-0.00146437	0.230516	-0.241872	-0.175949	-0.25575	-0.202812	-0.229784	-0.247821	-0.156075	-0.23925	-0.254073	0.227974	0.182786	0.0349379	-0.00258017	0.236854	-0.0739536	0.0345941	0.152518	0.00441408	0.108763	-0.0153618	-0.090405	0.0410147	0.248216	0.580353	0.160647	0.348449	0.131636	0.100441	0.245371	0.115848	-0.168963	0.0712819	-0.218007	-0.0618443	-0.153456	-0.0401711	0.0066061	0.0838122	0.114684	-0.0822568	0.0617437	0.271424	0.00179672
BLVRA	-0.12719	-0.0561261	0.048131	-0.0254707	0.0909066	-0.304405	0.136667	0.456392	0.19986	0.396848	0.120096	0.248974	0.0561633	-0.407549	-0.33876	-0.249796	-0.435946	-0.0773339	0.457456	-0.0250616	0.237546	0.197058	-0.103559	-0.0687737	-0.164076	-0.0886502	-0.058085	0.0981998	-0.0854626	0.0512557	-0.237212	0.0806446	0.101641	-0.295552	-0.530975	0.156214	-0.0855794	0.153645	0.183289	0.055377	0.25149	0.430052	0.35135	-0.109711	0.014771	-0.184871	0.100097	-0.0310745	0.0888701
BLVRB	0.504251	0.0592089	0.152659	0.134581	-0.167887	-0.464037	0.0709925	-0.253574	-0.218844	-0.675127	-0.285218	-0.649628	-0.591281	-0.51734	-0.3023	-0.38168	-0.644662	-0.390613	0.196835	-0.219025	0.16198	-0.287249	-0.133524	0.000195	-0.273941	0.681798	0.373971	0.241122	0.0789137	0.253856	-0.140965	0.160947	-0.156984	0.0333929	0.311763	0.124499	0.0391102	-0.0753889	0.0132666	0.144386	-0.174992	-0.110067	-0.0263977	0.0702992	-0.289246	0.479309	0.0918217	-0.356238	0.237795
BNC1	0.0951505	0.232942	0.225819	0.106838	-0.150799	0.186235	0.112294	-0.157659	-0.0534053	-0.0530515	-0.0271029	-0.000704	-0.138837	-0.0643635	0.0738735	-0.0370984	0.152255	0.0497484	-0.108139	-0.0979576	-0.163795	-0.0103884	0.0925388	-0.0364423	0.201895	-0.122936	0.0376439	0.0492086	0.146488	0.171671	0.282725	-0.0333481	0.0535412	0.210569	-0.0425911	-0.0945816	-0.125389	0.174307	0.0853429	-0.0890007	-0.0295305	0.214119	0.0703898	-0.00614882	-0.0756202	0.0133243	0.0768805	-0.178637	-0.121625
BMP1	-0.11352	0.235955	0.0475216	-0.305834	-0.147221	0.140485	0.0100594	-0.406775	-0.0446515	-0.333707	-0.171381	-0.150346	0.393023	0.291103	0.212178	0.333042	0.352029	0.0656362	-0.325593	0.190016	0.145813	-0.151692	0.0375319	0.12647	-0.00170374	0.548724	0.0670047	-0.00303078	0.178513	-0.133976	0.0138535	-0.134575	-0.0706668	-0.0734501	0.259499	-0.00345659	-0.174475	0.0755935	0.0850353	-0.139183	-0.0241022	-0.300898	-0.133819	0.0582609	-0.0486627	0.17898	-0.211243	0.406725	0.284769
BMP2	-0.0241184	0.383945	0.0726962	0.0838175	-0.144131	-0.0952621	0.355363	-0.162855	0.088623	0.114342	-0.0886178	-0.138618	-0.0182881	0.400234	-0.24454	0.21505	-0.187253	0.29051	0.0276361	-0.136282	-0.0468411	-0.0582652	-0.147147	0.0222931	0.0449748	-0.135959	-0.077486	0.0176606	-0.0527525	0.0314131	-0.316434	0.151813	0.122317	-0.112313	0.103818	0.0706029	-0.0541415	-0.0758452	0.0294924	-0.0484972	0.22857	0.0699615	0.00319672	-0.0823288	-0.0113688	0.148009	-0.0788741	0.0861483	0.0165253
BMP3	-0.196383	0.0863171	-0.322485	-0.0188127	0.0282431	-0.0106497	0.0538702	-0.0359535	0.0309362	-0.267872	-0.000132	-0.159156	-0.12648	-0.0326519	-0.0204515	0.117723	0.179336	0.0153399	-0.0106497	0.0381961	-0.0191836	0.103463	0.32907	-0.149696	0.201049	-0.0888767	0.0631447	0.192986	0.281721	0.0922256	0.276866	0.133046	0.0241079	-0.145654	-0.0668249	-0.184813	0.0627875	0.0792489	-0.249636	-0.0471363	0.0571089	0.182067	-0.141767	0.03373	-0.31615	0.0819983	0.11714	-0.0245199	-0.127151
BMP4	0.0323997	0.0847979	-0.431329	-0.0028801	-0.140212	-0.0375648	-0.128601	0	-0.13898	-0.0229907	0	-0.138758	-0.0807376	-0.149905	0.086884	0.0100689	0.324079	0.140267	-0.22849	0.299385	0.0471029	-0.181034	0.246234	0.170281	-0.133152	0.136913	0.206664	0.0742655	0.165345	0.248048	0.0624371	-0.00342321	-0.246603	0.148008	0.277253	0.0859733	-0.121135	-0.0964513	-0.139402	-0.0624099	0.00842142	-0.163204	-0.165554	0.0377803	-0.0342383	0.0412302	0.0194626	0.174708	0.117566
BMP5	-0.133823	-0.126939	-0.511048	-0.0454626	0.0189624	-0.053453	0.0773787	0.219067	-0.275635	0.253651	0.501137	0.169596	-0.0935202	-0.246436	-0.127116	-0.0620832	-0.201202	-0.283055	0.0662842	-0.0201092	0.208621	-0.252276	0.266879	0.165854	0.237765	-0.039021	-0.261497	-0.168899	0.153634	0.114613	-0.100675	-0.0619307	-0.315115	-0.226511	-0.255011	0.00407982	-0.0261664	0.289244	-0.0190058	0.389688	0.592126	-0.350382	-0.0344296	0.0675874	0.0994987	0.15468	0.030107	0.175019	-0.0194936
BMP6	-0.0448093	0.406881	-0.193041	-0.167858	-0.0104132	0.103537	-0.149945	-0.0269098	0.0824695	-0.227316	-0.345143	-0.28257	0.218881	0.13868	0.303532	0.0858617	0.381345	0.416135	-0.159376	-0.145418	-0.0442324	-0.00317097	0.362322	0.172792	0	0.143196	-0.0859737	0.0331435	0.132658	0.1882	0.136891	-0.148413	-0.0751128	0.0220819	-0.168088	-0.0262079	-0.13786	-0.0846429	-0.170043	-0.113431	0.0493393	-0.213533	-0.306121	-0.0452204	0.174312	-0.138295	0.0409265	0.0629411	-0.0127926
BMP7	0.0740018	0.295875	-0.0886664	0.0712557	-0.0144753	0.217978	-0.000309	0.0364628	0.14103	-0.150089	-0.0763602	-0.207715	-0.0786824	0.0022254	-0.0206232	0.0561242	-0.0681605	-0.0211906	-0.202569	0.00078	-0.124272	0.095603	0.281804	0.0206108	0.152006	-0.0446763	0.0906634	0.120115	0.14629	0.157865	0.115011	-0.0130239	0.027606	0.121798	-0.0814643	0.100576	0.009727	0.0306702	0.000496	-0.00455236	-0.0817609	-0.168659	-0.0736818	0.0620399	-0.19236	0.0015049	0.0180035	0.231315	0.0176754
BMP8B	-0.232379	0.26387	0.0443454	0.0658193	-0.263535	0.0913167	-0.181092	0.114349	0.0928669	-0.613333	-0.429533	-0.211197	-0.130382	0.187435	-0.00265026	-0.0935106	-0.313448	-0.00065	-0.405722	0.268984	-0.374032	0.679217	0.319924	-0.0691538	0.285863	-0.00105524	0.41059	0.273679	0.166384	0.212307	0.372697	0.136851	0.512079	0.420907	0.335598	0.428086	-0.320782	0.183653	0.147715	-0.0641966	-0.041822	0.0218787	-0.415555	0.181834	-0.124444	-0.0598197	0.371003	-0.0434861	0.232394
BMPR1A	-0.130107	-0.375689	-0.00667	-0.136472	0.241605	-0.020669	0.000353	0.0743756	-0.103674	0.241332	0.244746	0.24484	0.337525	0.166531	0.143955	-0.0706835	0.279153	0.146447	0.175733	0.0411983	0.0296855	-0.228875	-0.546168	0.0512142	0.143123	-0.435587	-0.307133	-0.162686	-0.200069	-0.242892	-0.792318	-0.294523	-0.358119	-0.352355	-0.0123773	-0.0677404	0.103226	0.254135	-0.114502	0.12092	0.00449514	0.161947	0.158556	-0.0146384	0.11993	-0.00570583	-0.210856	-0.138947	-0.569191
BMPR1B	-0.0586591	0.263289	-0.195831	0.0866051	0.0232873	-0.0101314	-0.0112286	-0.0815949	-0.11904	-0.0692263	0.0765343	-0.104353	-0.157248	0.00778484	-0.0475998	0.0445743	-0.103235	-0.0715566	-0.17059	-0.0751467	-0.141711	0.0338326	0.310917	-0.01577	0.0194111	-0.14121	-0.0455718	0.176218	0.222934	0.0516143	0.0354443	-0.075984	0.0503311	0.195078	0.0498505	0.124647	-0.0716023	-0.032784	0.193982	-0.0164156	0.118713	-0.0752668	-0.0771165	-0.0548978	-0.104363	0.037137	0.139705	0.0506725	-0.0509696
BMPR2	-0.231684	-0.13236	-0.0232067	-0.198498	0.075572	0.0670261	0.145344	0.258327	0.437046	0.561714	0.112782	0.282825	0.343767	0.347779	-0.0453334	-0.113082	0.237131	0.371669	0.0974302	-0.0327449	0.291376	-0.365212	-0.74339	-0.151198	-0.0281892	0.0239582	-0.0562711	0.182068	-0.427807	-0.547761	-0.570179	0	0.00162125	-0.242861	-0.267132	-0.313303	-0.0503984	0.310225	0.207953	-0.0148449	0.162004	0.475387	0.774623	-0.0383444	0.06598	0.416136	-0.22365	-0.117162	-0.109368
BMX	-0.0209703	0.0704112	0.064147	-0.102182	-0.0973692	-0.0771265	0.0184793	0.000378	-0.0481606	-0.0709829	-0.127455	0.057765	-0.0258508	0.243231	0.0939007	-0.0853949	0.28259	-0.0174918	0.00920629	0.0545592	-0.13679	-0.0613036	-0.0541172	-0.0565677	-0.100168	0.0154562	0.0278158	0.1708	-0.00301647	-0.107205	0.0173597	-0.0752482	-0.0560513	0.142	-0.000844	-0.166504	-0.00618935	0.0103369	-0.0520673	-0.034658	-0.0300746	0.109383	0.0214992	-0.0926561	-0.0943274	0.0297203	-0.0700727	0	-0.0398478
POLR3D	0.0391364	-0.0240307	-0.24108	-0.0199842	-0.106125	-0.377299	-0.140748	-0.0853629	-0.369634	-0.0654779	-0.300616	-0.176297	0.0272036	0.0934148	0.214868	0.194891	0.213498	-0.102736	-0.140661	0.229685	0.246631	0.117568	0.045928	-0.0419979	0.0821414	0.275512	0.138072	0.146086	0.0527749	0.335363	0.186531	0.0888405	0.0136204	0.0257645	0.256072	-0.25639	-0.0786777	-0.0922012	-0.0108843	-0.135334	-0.0313544	-0.402293	-0.256742	0.205054	0.088263	0.00186539	0.29297	0.137066	0.240427
BNIP1	-0.103817	-0.0465155	-0.124398	0.00491238	-0.0126548	-0.161891	0.059948	0.000998	-0.109522	0.0955186	-0.0576429	-0.0541844	-0.052434	-0.106313	0.145982	-0.151358	0.0368361	-0.374236	0.0644155	-0.00462532	0.164117	-0.187969	0.0774727	-0.290061	-0.333014	0.266395	-0.157943	-0.217525	-0.237331	0.130777	0.0156631	-0.204371	0.00924873	0.0258889	-0.264433	-0.054513	-0.00408411	0.116808	0.0451817	0.138954	-0.00614023	-0.0323844	0	-0.0456839	-0.133399	-0.311067	0.0648298	-0.290474	-0.225189
BNIP2	0.148417	-0.334032	0.213751	-0.0230255	0.465212	-0.402156	0.0934973	0.161485	0.0788307	0.393854	0.273846	0.313303	0.109677	-0.00533676	-0.421811	-0.311908	0.0450211	-0.0997019	0.273887	-0.171325	-0.0607834	0.0869932	-0.953736	-0.0929728	-0.0408659	-0.493626	-0.595017	-0.574272	-0.510755	-0.413944	-0.834797	-0.325593	-0.249014	-0.322781	-0.33114	-0.169523	0.0363159	-0.116123	0.100131	-0.0416622	-0.128904	0	0.137946	-0.131462	0.0284576	0.0773869	0.135892	-0.108139	-0.623657
BNIP3	0.329411	0.0695696	0.0864115	0.245509	0.121494	0.327971	0.211932	0.174736	0.159547	-0.0286322	0.143455	0.0654888	-0.430884	-0.287649	-0.245783	-0.247936	-0.122503	-0.0817862	0.14484	-0.228032	0.229542	-0.389707	-0.523	0.176246	-0.215614	-0.130769	-0.127696	-0.30077	-0.413296	-0.30843	-0.957808	0.0415869	-0.00363541	-0.00584984	0.120557	0.15431	0.128985	0.04321	0.102375	-0.0897264	-0.0479727	-0.076726	-0.196509	0.105629	-0.0488768	0.0328999	-0.00785923	-0.0728025	-0.381029
BNIP3L	0.176228	0.103564	-0.117797	-0.000201	0.156735	-0.265064	0.0797586	0.142076	-0.221857	0.295887	0.0249062	-0.0249681	0.208151	0.232162	-0.0877686	-0.122005	-0.0189257	0.0887775	0.108761	0.0485744	0.15123	-0.0941267	-0.354727	0.0572462	-0.172296	0.0746422	-0.0718498	-0.0140209	-0.11119	-0.109994	-0.559155	0.035285	-0.101946	-0.0214415	-0.220553	-0.0722742	0.124602	0.276157	0.0118523	0.309607	0.267169	0.15475	0.150409	-0.0916185	0.0607777	0.118404	-0.148244	-0.374801	-0.0136433
BOK	0.514848	0.437307	0.196539	0.342849	-0.238701	-0.300313	-0.163457	-0.238804	-0.270327	-0.720471	-0.672609	-0.429996	0.512045	0.52354	0.49694	0.865215	0.523061	0.39644	-0.15421	0.262721	0.637359	-0.0868616	-0.0780821	0.455474	0	0.816514	0.217105	0.159464	0.477734	0.12717	0.059948	0.166656	-0.243066	0.230466	0.112931	0.514181	-0.546177	-0.012744	-0.250608	-0.0581589	-0.526876	-0.272593	-0.648529	0.357359	0.116559	0.200718	0.0465584	-0.059864	0.511803
DST	-0.238192	-0.277444	-0.122964	-0.36543	0.324494	-0.0420656	0.46007	0.316327	0.242419	0.608838	0.674936	0.874125	0.0265627	-0.0262699	0.034894	-0.354864	-0.246443	-0.183701	0.0319014	0.0153542	-0.155248	0.00775242	0.133019	-0.223863	0.0505123	0.00335121	-0.0913773	-0.158835	-0.179655	-0.194494	-0.425227	0.0075922	0.0263662	-0.286689	0.140733	-0.373832	0.415148	0.494102	0.449625	0.363666	0.531412	0.354235	0.431474	0.000397	-0.115696	0.530011	-0.129257	0.0708246	-0.337037
FOXL2	0.172426	0.572776	-0.00703287	0.147662	-0.0509434	0.457291	0.0656366	0.287827	0.324217	-0.23349	0.00894976	0.0265932	-0.280053	-0.167028	-0.119065	-0.191815	-0.0289125	0.0491381	-0.085227	0.0118117	-0.246256	0.00429487	-0.216423	-0.0685554	0.150263	-0.181143	0.117878	-0.0887885	0.229796	0.137229	0.107032	0.0103717	0.244421	0.306199	0.0170531	-0.0545096	-0.13749	-0.100459	-0.0717306	0.20865	0.131701	0.257042	0.12501	-0.00511026	-0.275901	-0.186071	-0.308907	-0.18675	-0.00996399
BPGM	0.0217185	-0.0353899	0.0491204	0.191328	0.0171933	-0.429633	-0.369591	-0.0284295	-0.274552	-0.023942	-0.179347	-0.0203619	-0.0480452	-0.0523481	0.0609293	-0.14964	-0.337581	-0.116059	0.183091	-0.177893	0.126825	-0.116579	0.033154	-0.0937848	-0.100459	-0.0838823	-0.0870323	-0.142026	-0.0922217	-0.187585	-0.617243	-0.167481	-0.0353446	0.109826	0.00367308	0.186122	-0.172907	-0.384845	-0.278501	0.0437531	-0.108539	-0.051374	-0.130998	-0.0631619	0.238619	-0.119627	0.0529866	0.0894985	-0.308485
BPHL	0.315642	0.182889	0.238572	0.211486	0.279675	0.182695	0.237868	-0.12797	-0.451602	-0.207609	-0.0877771	-0.0329628	0.103803	-0.259263	0.0465164	0.138069	0.200604	0.046546	-0.183026	-0.158873	0.39447	-0.214533	-0.310142	0.135127	0.289707	0.319355	0.0949573	0.0636625	0.292199	-0.0300598	-0.140939	-0.0285521	-0.0870409	-0.140468	0.226297	0.218042	-0.201135	0.0326815	-0.122325	-0.371971	-0.191843	-0.515623	0.0727425	0.0687046	-0.162027	0.27966	0.561169	-0.0434685	-0.0963154
BPI	-0.212266	0.018621	-0.0776114	-0.0393496	0.0213752	-0.137181	0.0254717	-0.185281	0.0661693	-0.114323	-0.0717239	-0.154346	0.30965	0.0652056	0.275159	0.142938	0.0783567	0.261828	-0.189195	0.0121655	-0.0939407	-0.0811043	0.296644	0.098218	-0.13527	0.0523214	0.0532322	0.151782	0.17414	0.146183	0.199298	0.0119267	-0.0257831	0.115912	0.067687	0.249338	0	0.19653	0.194439	0.137465	-0.00678396	0.0596614	-0.0557413	0.0873251	-0.106493	0.0919828	-0.0833283	0.0485392	0.209623
BRCA1	0.187121	0.104021	-0.435493	0.0728664	0.182748	-0.0932951	-0.047092	0.299234	-0.0599241	0.0982337	0.0379457	0.12003	-0.0893259	-0.00329924	0.272346	-0.265804	-0.101613	0.43914	0.0948134	-0.191532	0.131818	-0.0876837	-0.0553918	-0.165956	-0.0939145	-0.197835	-0.0634298	0.147285	0.0912018	0.0902343	0.0962477	-0.161706	-0.165006	-0.0860724	-0.325132	0.256263	0.133776	0.0869312	0.44939	0.302592	0.0967655	-0.146113	0.0774336	0.0301657	-0.156538	-0.0439634	0.090744	-0.0750275	-0.14635
BRCA2	-0.104198	-0.0404105	-0.15285	-0.0949001	0.103123	0.110888	0.0517554	0.0593991	0.260887	0.0566092	0.278347	0.16779	-0.0324159	0.0188951	0.0576835	0.22658	0.183948	0.124743	0.0982246	0.0438976	0.176561	-0.131509	-0.174685	-0.166706	0.0585451	-0.021399	-0.0597763	-0.0799298	-0.0102215	0.0302234	0.131523	-0.139708	-0.0547071	-0.000721	-0.0646381	-0.0210252	0.0893884	-0.12769	0	0.0982351	0.0285106	-0.00234222	0.192435	-0.0758686	-0.0183339	0.22094	-0.12419	0.0922484	-0.176948
BRDT	0.00262547	0.0761189	0.0233254	-0.00941467	-0.128251	-0.0369925	0.00262499	-0.105369	-0.00375319	-0.110294	-0.213082	0.0324135	0.13862	0.0644436	0.116888	0.0346108	-0.0395246	0.0606399	-0.124351	0.084197	-0.0586352	0.0571661	0.28265	0.0621624	0.148033	-0.10813	0.0203271	0.327568	0.159782	0.102756	0.266835	0.15426	0.0927668	-0.00135851	0.0279388	0.10882	-0.0569963	-0.0231218	-0.0865035	-0.00592709	-0.0452661	-0.0593939	-0.0689573	-0.0326862	0.0416255	-0.0445943	0.205499	0.0730634	-0.03443
ZFP36L1	-0.0398922	-0.120362	-0.430517	-0.0110769	0.230654	-0.127354	-0.433689	-0.210599	0.39296	0.138611	-0.0221348	-0.276586	0.776391	0.268325	0.623601	0.812333	0.344289	0.195311	-0.0683079	0.115131	0.196243	-0.00918007	0.10703	0.100507	0.10352	0.246042	0.0965118	0.159315	0.0832109	0.116176	-0.277367	-0.212066	-0.201919	-0.0385294	0.0184479	-0.349827	-0.53842	0.216595	0.2168	-0.24781	0.289626	-0.42969	-0.218615	0.280174	0.192022	0.225071	0.280049	0.381576	0.144142
ZFP36L2	-0.342057	0.403257	-0.197213	-0.275366	-0.457058	0.048955	-0.333291	-0.338787	-0.192362	-0.314665	-0.399969	-0.432587	0.519767	0.978379	0.805488	0.45348	0.287168	0.374042	-0.444612	0.231117	-0.107952	-0.0482693	-0.145926	0.249953	0.0614967	0.341807	0.0327787	0.161359	0.0436306	-0.145537	-0.160723	0.273301	-0.150769	0.137569	0.26742	0.0123043	-0.245632	-0.470539	-0.369217	-0.411564	-0.206883	-0.270841	-0.312601	0.480678	0.2282	0.393772	-0.283071	-0.116214	0.407561
BRS3	-0.00137425	0.228888	0.11155	-0.0069828	-0.0362186	0.0722327	-0.0473523	-0.120711	0.269264	-0.125477	-0.0086565	0.15187	-0.21954	-0.0722685	-0.0577493	-0.0917277	-0.0315609	-0.0544863	-0.125103	0	0.0247555	0.107019	0.366001	-0.0515227	-0.0460639	0.17133	-0.0293207	0.248009	0.267813	-0.00110054	0.0726795	0.107576	0.0341358	0.0833144	0.121912	0.159306	0.0639529	0.032084	0.0827742	0.0771823	0.0567102	0.0422616	-0.0223222	0.0620599	0.0328679	0.135661	-0.0194259	0.151119	-0.0225525
BSG	-0.10952	-0.197346	-0.408686	0.0740118	0.0266972	-0.257202	-0.0244713	0.0398808	-0.257266	-0.11327	-0.0320005	-0.132798	0.00865936	-0.224668	-0.12806	-0.150604	0.153995	-0.305255	0.34338	-0.121641	-0.188211	-0.443505	-0.305185	-0.313063	0.0520124	0.134344	-0.0941696	0.202353	0.0351334	0.0137701	-0.119128	-0.149647	-0.193027	-0.125236	0.0783329	0.0599232	0.0400381	0.2648	-0.133294	0.380689	0.0975418	0.0769844	0.160803	-0.40642	-0.164897	-0.313394	-0.376047	-0.379247	0.100801
BST1	-0.332922	0.393376	0.356488	0.0682826	0.213418	-0.0226455	0.319167	0.0310068	0.00593424	-0.267947	-0.140489	-0.17351	-0.065742	0.0540185	0.0720758	0.022357	0.115269	0.0312762	0.13803	-0.234668	-0.165497	-0.191234	-0.141397	-0.245106	-0.145189	-0.029233	0.0379834	-0.155594	0.159659	-0.0814853	0.396359	-0.226625	-0.153314	-0.161536	-0.205034	0.0599799	-0.062777	0.191636	0.214242	-0.194572	0.0712833	0.400581	-6.2e-05	0.148221	0.0744638	-0.171355	0.0191355	-0.0784855	0.0374875
BST2	0.31815	0.408208	-0.117563	-0.521564	0.285233	0.0517607	0.597238	0.696137	0.515889	0.0973988	0.648767	-0.0248747	-0.590111	-0.633891	-0.779594	-0.693958	-0.750768	-0.499387	0.338704	-0.104264	-0.120977	-0.16166	-0.845062	0.152928	-0.365029	0.0369654	-0.116299	0.0961542	0.00554371	-0.048831	-0.904532	0.223	-0.182586	-0.114779	-0.204933	0.159018	0.477992	0.0693855	0.128978	0.697483	0.550775	-0.025281	-0.113054	-0.621866	0.021575	0.0356131	-0.0357475	-0.26196	-0.449344
BTC	0	-0.00189018	-0.117064	0.0516043	-0.0463219	-0.0604215	0.121681	-0.140309	-0.157273	0.00769663	-0.0529094	-0.053051	0.0373492	-0.0648069	0.13729	0.148504	0.0161591	0.0463929	-0.0888987	0.0432901	0.0112991	0.0681601	0.294185	-0.00479984	0.204447	-0.0730653	0.160234	-0.207129	0.0952139	0.119063	-0.0162606	0.0743875	-0.0922246	0.105913	0	0.0863099	-0.297492	0.029511	-0.045764	0	-0.0813098	-0.191131	0.0558262	0.0432453	-0.0449486	-0.166533	0.0345535	0.03651	0.0432982
BTD	0.366559	-0.269845	0	0.0227251	0.279146	-0.168551	0.347552	-0.0820007	0.0495777	0.0254602	0.158566	0.0362434	-0.338134	-0.145971	0.052021	-0.21271	-0.0779181	-0.0841551	0.273814	-0.0146179	0.0688162	-0.434085	-0.761228	0.20537	-0.0134115	-0.00202751	-0.00592613	-0.112513	0.151678	0.141794	-0.53254	-0.461187	-0.274254	-0.0361223	0.26524	0.00981903	0.278096	0.321896	0.11305	0.371025	0.209028	-0.0724125	0.0187149	0.127857	-0.177591	0.0345201	-0.102314	-0.393702	-0.0955811
KLF9	0.00102234	0.562955	0.464715	-0.297276	0.184799	0.173283	0.330855	-0.0010643	-0.236206	-0.248533	-0.0667877	-0.327482	0.29184	0.621922	0.190666	-0.363317	-0.267433	0.536154	0.0321627	-0.154933	0.117642	-0.374389	-0.448998	0.0765839	-0.244611	-0.351501	0.0931788	-0.270343	0.0376387	-0.386992	-0.256857	0.250575	-0.476393	0.168405	-0.3007	0.0567446	0.454629	0.275056	0.146379	0.212245	0.0415306	0.442614	-0.043663	-0.0203552	0.0117998	-0.00105762	-0.354138	-0.58021	0.0941849
KLF5	0.0389652	0.337895	0.0632305	0.0649624	0.0467033	0.119458	-0.0825591	-0.089129	-0.0388083	-0.181848	-0.0472064	0.0577016	-0.203974	0.407303	-0.155361	0.0200343	-0.166552	0.0249553	-0.141682	0.0423365	-0.212184	-0.0118766	-0.19349	0.0547986	0.277159	0.109679	0.0808482	-0.0518293	0.166872	0.118746	0.121183	0.141614	0.111425	0.170723	0.178823	0.0980945	-0.076633	-0.0403752	0.283612	0.0379972	-0.198967	-0.0117402	0.144787	0.079463	-0.170889	-0.141555	0	-0.112556	0.119947
BTF3	0.0484362	-0.0330009	0.0178738	0.082305	-0.093646	0.0177231	-0.00546074	-0.155068	-0.133566	-0.138608	0.192509	-0.0536346	0.242001	0.0713873	0.0558977	0.282289	0.173895	0.327033	-0.222974	-0.108345	0.087966	-0.221958	-0.638542	-0.105387	0.125753	-0.192678	-0.209534	-0.218703	-0.204758	-0.200146	-0.507361	0.0744333	-0.0499907	-0.0826473	-0.172202	0.0117636	0.0217896	-0.21833	0.161944	-0.0945759	-0.0846567	-0.0251398	-0.160172	0.122461	0.102134	0.0445404	0.116978	-0.172631	-0.357203
BTF3P11	0.210142	0.0137234	-0.0828381	0.21287	-0.117778	-0.280481	-0.153035	-0.0663576	0.135506	0.0521092	-0.130352	-0.0832014	-0.0895166	0.0332403	-0.109161	-0.0639138	0.200502	-0.111555	-0.0169234	0.260412	0.115668	0.0108485	0.355429	-0.0862341	0.0725441	-0.142988	0.00573444	-0.129684	-0.134696	0.112498	-0.0121775	0.0635514	0.0423145	0.123981	0.00698709	-0.0273309	-0.10891	-0.240555	-0.125709	0.025866	-0.0997763	-0.0251813	-0.223104	0.0279241	-0.141601	0.0165091	-0.0847135	0.0479012	0.0376315
BTG1	-0.444576	0.565264	0.172895	-0.233839	-0.268367	-0.036581	0.0576744	-0.413828	0.173174	0.193197	0.200568	0.0489693	-0.0351305	0.340455	0.299536	-0.7224	-0.291613	-0.0606031	0.0131941	-0.229843	-0.219054	-0.454899	-0.664021	-0.0389147	-0.0802193	-0.425241	-0.242151	0.0490656	0.20602	-0.441077	-0.317387	0.40284	-0.216271	-0.34406	-0.0204477	-0.222948	0.701055	0.102095	0.327891	0	0.350508	0.0469322	0.343758	0.252469	-0.204987	0.611224	-0.411213	-0.403594	0.0875568
BTK	-0.043931	-0.0124769	0.24027	-0.0214934	0.00870132	-0.40677	0.238758	-0.220634	-0.0487261	0.472001	0.0906014	0.0171566	-0.181915	-0.059329	-0.047873	0.293782	-0.150191	-0.347728	0.350591	-0.258084	0.0885067	0.375295	-0.231781	0.0173616	-0.0543551	0.153436	-0.2349	0.0516109	-0.0550232	0.0813413	0.0582762	0.0322151	0	0.0987105	-0.243312	-0.00591755	0.0271702	-0.0787787	-0.380481	0.0413318	0.332701	0.181959	0.113147	-0.0154781	0.181738	0.118475	-0.261819	-0.116752	-0.30441
BTN1A1	0.0818272	0.0803561	0.138438	0.0173593	-0.0791101	0.249416	0.0223317	-0.0448647	0.137518	-0.099616	-0.0558324	-0.0862937	0.0239005	0.0405006	0.0143018	-0.0877843	-0.0519381	0.262137	0.0554023	0	-0.0272303	0.0783434	0.308338	0.00536346	-0.0448747	0.00200415	0.0212359	0.281409	0.0781836	0.142241	0.0194011	-0.032732	0.0553865	0.0606432	0.0763202	-0.144046	-0.0392141	-0.00946856	-0.0675378	0.0512371	-0.00143862	0.125102	-0.0294623	-0.0362535	0.0146446	-0.113673	-0.0303445	0.192007	0.0648365
BUB1	-0.0517402	-0.0513291	0.145144	-0.125099	-0.0541515	0.0367346	0.136823	0.00172949	0.0144691	-0.0768404	0.0504766	-0.107257	-0.0922151	0.0847387	0.0992155	-0.106563	0.141026	0.204897	-0.00756645	0.00088	-0.0723677	-0.0358238	-0.0991898	-0.102313	-0.0628009	-0.0572119	-0.0554714	0.0617633	0.196611	0.0344834	0.0648589	0.143122	0.164398	-0.0222726	-0.151469	-0.119647	0.00214338	0.153847	-0.0577364	-0.0180745	-0.0301652	0	-0.014555	-0.0439363	0.0829058	-0.0953493	0.109653	-0.110322	-0.0258818
BUB1B	0.098433	0.130997	0.0554528	0.0454626	-0.0686774	-0.0090251	-0.0510426	-0.0902619	0.065701	0.0870914	0.0320511	0.143067	0.0543451	-0.0608163	0.0217252	0.136683	-0.0950141	0.128539	0.00651026	-0.0835028	-0.067697	0.0653734	0.521513	0.0475073	0.169655	-0.0754952	-0.129449	-0.130939	0.17489	-0.061142	0.14995	-0.120364	-0.0551672	0.227301	-0.0121756	0.0226707	0.00331545	-0.0329013	-0.0254755	0.058744	0.195682	0.00696087	-0.0272241	-0.143403	-0.0190005	0.102152	-0.100842	0.160647	-0.0439639
BYSL	0.0988569	-0.14087	0.0823851	0.0143023	0.170456	-0.181413	-0.129937	-0.121358	-0.0126009	-0.135656	-0.0221357	-0.200971	-0.241708	-0.0350423	-0.0182767	0.0603399	-0.0771475	0.0816793	0.151	-0.0306048	0.160303	0.0625248	-0.173253	0.0282059	-0.00298643	0.0924592	0.0753341	0.128094	-0.0357618	0.0796819	0.0371151	-0.138556	-0.171405	-0.130717	-0.174529	0.104261	0.070374	-0.0560245	-0.22839	0.0252404	-0.0471067	0.0106425	0.0359011	-0.0096612	0.161393	-0.0801005	0.0676642	0.200004	0.0661364
TSPO	-0.0797319	0.17685	0.209883	-0.0238795	-0.0731525	0.334678	-0.105434	0.00895119	0.00416565	-0.359922	-0.252023	-0.0868325	-0.172474	0.131868	-0.0924511	0.123526	-0.299191	0.0924792	-0.274806	0.109191	-0.414984	-0.0133581	0.284769	-0.0815735	-0.0100594	0.0786052	-0.0712786	-0.0932441	0.0866065	0.0127406	0.163686	0.0891557	0.016727	0.267357	0.0892873	0.0228839	0.0499148	0.0490885	0.0727444	0.00366306	0.0338654	0.184365	0.133011	-0.390306	-0.153432	-0.195872	-0.08284	0.0738969	0.213882
C1QBP	0.0518484	-0.225599	0.100605	0.0344391	0.217957	-0.13278	0.124478	0.128393	0.01124	-0.0400362	-0.00193405	-0.145204	-0.0158157	-0.24343	-0.141679	-0.0588255	-0.0841656	0.270784	0.0851765	-0.240474	0.112499	-0.207569	-0.827737	0.000936	0.0108328	-0.0911083	-0.0464554	-0.24123	-0.503298	-0.193219	-0.700509	0.00485516	-0.262201	-0.0390711	0.0286455	0.256007	0.195106	-0.0103865	-0.287197	0.0733967	0.166451	0.0621557	0	0.0179062	-0.079277	-0.162948	-0.1753	-0.427573	-0.330894
SERPING1	0.12979	0.293098	0.176212	0.0995255	-0.115608	0.165279	-0.000623	-0.0171766	0.0888987	-0.0619383	-0.240009	-0.25244	0.437776	0.483457	0.469485	0.39975	0.438434	0.571222	-0.192517	-0.144401	0.197579	-0.391557	-0.0968866	0.0464964	0	0.116752	0.0480232	0.204013	0.0873098	-0.203236	-0.416554	0.254951	0.168118	0.276991	0.235077	-0.123549	-0.237271	-0.120672	-0.0216351	-0.121827	-0.0540218	-0.18312	-0.157907	0.0983973	0.188418	0.261579	-0.0248604	-0.291399	0.0656824
ERC2-IT1	0.11243	0.10253	-0.0777864	0.219254	-0.16136	0.0506625	0.0234303	0.0402732	0.0692592	-0.24924	-0.0448198	0.0677047	-0.100969	-0.0832233	-0.0328717	0.110222	-0.10254	0.226592	0.0607796	0.0435452	0.034606	-0.013052	0.134731	-0.0898738	-0.0445027	-0.121907	-0.0421519	-0.0156374	0.0271859	0.0330334	0.203718	0.0391407	-0.0514641	0.0545006	-0.0337138	0.243174	0.0879736	-0.0803728	0.0501494	0.103637	0.0710912	-0.0666485	0.122129	-0.0597625	0.0249038	-0.148755	0.073956	-0.034153	-0.110225
C1QA	-0.0212722	0.266922	0.469163	-0.1672	0.16277	-0.525631	0.319959	0.0403848	0.0982528	0.031734	-0.375339	-0.313361	-0.294952	-0.222442	-0.34333	-0.0224705	-0.062449	-0.402883	0.323303	-0.261265	0.380665	0.33876	-0.0886364	0.0397658	-0.159835	-0.0122852	0.174982	0.351421	0.235126	-0.0399284	0.292524	0	-0.16713	0.180889	-0.163372	0.024909	-0.047338	-0.097456	0.252737	0.476856	0.253188	0.648016	0.0100222	-0.0734162	0.385483	0.446712	0.238163	-0.414595	-0.154996
C1QB	0.0771446	0.428724	0.493711	0.124448	-0.0277452	-0.323596	0.169643	-0.0563631	-0.0977421	0.0812588	-0.476139	-0.201271	-0.0061388	0.119144	0.104885	0.210934	-0.000458	-0.100617	0.000716	-0.257186	0.247712	0.531056	-0.418517	0.0147924	-0.427188	-0.232647	-0.124685	0.247245	-0.0593996	-0.305115	-0.107186	0.162634	0.1466	0.245082	-0.154072	0.0954742	-0.21689	-0.186761	-0.0962133	0.257618	-0.0869741	0.272751	-0.305309	-0.0451488	0.50581	0.46121	0.0761108	-0.364771	-0.088069
C1QC	-0.101905	0.127723	0.284211	0.150591	0.146019	-0.235691	0.358211	-0.143281	0.0134554	0.444674	-0.296626	-0.304626	0.544722	0.40722	0.271223	0.548436	0.0942211	-0.242895	0.107875	-0.320507	0.291948	0.433009	-0.153157	0.0173883	-0.302501	-0.125926	0.191682	-0.0160494	-0.0253763	-0.170821	0.286213	0.294747	-0.289224	0.0701094	-0.182297	-0.0301209	-0.517818	-0.304384	0.250112	0.294083	0.0258942	0.615437	-0.105964	-0.0542278	0.450422	0.771414	0.0583725	-0.420101	-0.167328
C1R	-0.0586338	-0.0314169	0.115319	-0.0228462	0.130916	-0.152899	-0.0391397	0.0998573	-0.0707607	0.218264	0.0982075	-0.234316	-0.00119877	0.001647	0.0397072	-0.014349	-0.0131702	0.0946407	0.0956459	-0.224591	0.149225	-0.410192	-0.398774	-0.248393	-0.0568285	-0.00617695	-0.231446	-0.00530243	-0.13452	-0.209244	-0.374666	0.0950317	-0.0848961	0.0245037	-0.162334	-0.189148	0.0451336	0.0677195	0.215597	0.137861	-0.00160313	0.134375	-0.0162878	-0.0364218	0.109638	0.18628	-0.0365448	-0.374725	-0.218601
C1S	-0.0267639	0.0784998	0.04564	-0.100417	0.264882	-0.0830927	0.140694	0.249057	0.088377	0.400886	0.281032	0.0270824	-0.00289631	-0.203805	-0.112502	-0.0918703	-0.0670462	0.0614357	0.227715	-0.276972	0.0175896	-0.499563	-0.740626	-0.391691	-0.0854769	-0.26275	-0.34372	-0.161461	-0.383196	-0.494186	-0.64186	-0.0566511	-0.227235	-0.0877857	-0.161609	-0.113069	0.194963	0.133019	0.211719	0.231568	0.123134	0.211622	0.243118	-0.159588	-0.0481968	0.0905867	-0.17294	-0.420959	-0.421672
C2	-0.00484371	0.229713	0.32047	0.026103	0.0421753	-0.306088	-0.104094	-0.0712929	-0.00734329	0.0139513	-0.017024	-0.290741	0.100361	0.0807009	0.192137	0.195599	0.21003	0.231932	0.0427771	-0.205982	0.126728	-0.389266	-0.577444	0.0361509	-0.0889492	0.0750093	0.0206413	0.182942	0.26623	-0.142073	-0.210734	0.0328875	-0.418843	0.0208616	-0.241493	-0.0424204	-0.00259495	0.163463	0.23288	-0.0805283	-0.0940781	-0.158666	-0.104834	0.0881672	0.175532	0.224912	-0.0820742	-0.521268	-0.192675
C3	0.037117	0.12253	0.161835	0.0148935	0.00394344	-0.0863657	-0.0939465	0.0770979	-0.085906	0.0675879	0.0571814	-0.0384455	0.0820074	0.0611076	0.0519028	0.129922	0.113161	0.173554	-0.0540934	-0.146542	0.0636616	-0.317748	-0.20789	-0.127254	-0.0225143	-0.0433073	-0.113258	-0.00836754	-0.0571985	-0.242772	-0.340846	0.178248	-0.084589	0.0331478	-0.183117	-0.00823116	-0.00811481	-0.0640106	0.0363588	-0.0610704	-0.0420036	-0.0056982	0.0460672	-0.00739956	0.00472259	0.134122	-0.0839424	-0.278732	-0.130561
C3AR1	0.0616918	0.239918	0.543879	-0.0913367	0.11956	-0.374448	0.454564	0.180222	-0.0239606	0.805494	0.283786	0.282434	0	0.362109	-0.223149	-0.29663	-0.0235004	-0.0103416	0.39376	-0.240082	-0.0937438	0.36461	-0.523335	-0.204514	-0.452446	-0.294365	-0.298488	0.158603	-0.299727	-0.343639	-0.126132	0.17234	-0.00223446	-0.0321245	-0.556537	-0.301315	0.362608	-0.0283999	0.189219	0.288319	0.1257	0.60518	0.243437	-0.372691	0.500764	0.229996	0.167037	-0.215661	-0.303896
C4BPA	-0.275135	-0.122809	0.0890598	-0.0957775	0.475704	0.0460415	0.278973	0.46363	0.29519	0.494284	0.452844	0.0643272	0.0663166	-0.0911436	-0.0113468	0.0438643	0.229229	0.220917	0.20043	-0.358356	-0.0370598	-0.273087	-0.911345	-0.229417	-0.217473	-0.509173	-0.633791	-0.209805	-0.358983	-0.560606	-0.825103	-0.152865	-0.300324	-0.186962	-0.249746	-0.239631	0.185777	0.143472	0.218826	0.168579	0.141361	0.312429	0.263161	0	-0.165631	-0.0139055	-0.278851	-0.739237	-0.78686
C4BPB	-0.207886	-0.546512	0.201995	-0.0270205	0.501891	-0.0118923	0.348212	0.42793	0.682964	0.448781	0.709279	0.212758	-0.165326	-0.340953	-0.138096	-0.342896	0.0951061	-0.276042	0.160848	0	0.0747738	0.142872	-0.478327	-0.0852985	0.120819	-0.377434	-0.400857	-0.0842819	0.031435	-0.354218	-0.0856829	-0.134444	-0.158493	-0.515444	-0.580198	-0.0923386	0.108623	0.189154	0.477978	0.0403128	0.19955	0.269131	0.485552	0.00999069	0.0739975	0.22138	-0.13609	-0.305758	-0.430239
CAPN5	0.227809	0.350786	-0.00992918	0.369594	-0.218091	-0.0145431	-0.0360012	-0.407313	-0.278988	-0.701151	-0.347715	-0.249013	0.177512	0.128864	0.243289	0.128978	0.363919	0.133418	-0.143654	0.119975	0.0230408	-0.0145431	0.358123	0.213206	0.244918	0.56947	0.264276	0.0983849	0.0864239	0.315179	0.142174	0.0817308	0.109708	0.211313	0.27718	0.212762	-0.307084	-0.191581	-0.0157132	-0.228488	-0.449699	-0.312094	-0.404892	-0.0512304	-0.0145431	0.234662	0.191159	0	0.510911
C5	-0.143398	-0.0957842	0.357459	-0.160265	0.354999	0.182699	0.398389	0.395135	0.174632	0.826848	0.529838	0.272576	0.0258665	-0.149565	-0.135342	-0.105434	0.0789909	-0.16816	0.453849	-0.405289	-0.0266132	-0.410056	-0.580804	-0.348235	-0.0881519	-0.568085	-0.533628	-0.371079	-0.417494	-0.503264	-0.964065	-0.142866	-0.245119	-0.248369	-0.324758	-0.158409	0.304131	0.375221	0.488555	0.394086	0.204006	0.474373	0.399395	-0.136026	-0.117769	0.339506	-0.198236	-0.481312	-0.666211
C5AR1	-0.0435243	0.245357	-0.192704	0.0728006	-0.173322	-0.223853	-0.132986	-0.0809264	0.03475	-0.108164	0.0127869	-0.294413	0.00437832	0.359568	0.215345	0.340105	0.0966616	-0.297015	-0.037128	0.0120363	-0.171757	0.0520439	0.389505	-0.0357542	-0.0468783	-0.180727	-0.0627069	0.235028	-0.00651217	0.0112267	0.193091	-0.0831318	0.150868	0.264733	-0.204549	-0.0225425	-0.236282	-0.137369	0.0306916	0.0981827	-0.0384383	0.123624	-0.167457	-0.248797	0.270067	0	0.0616908	-0.00309658	0.146297
C6	-0.248526	-0.0393286	0.151911	-0.0936861	0.522558	0.200899	0.49207	0.729199	0.479921	0.593928	0.532122	0.306596	0.0255375	0.148349	-0.333996	-0.154049	0.0834198	0.298083	0.328007	-0.30524	-0.230963	-0.450068	-0.608277	-0.496834	-0.348325	-0.41121	-0.193155	-0.272651	-0.160754	-0.472987	-0.847074	-0.0624838	-0.341613	-0.677672	-0.621479	-0.0649538	0.506947	0.0390844	0.405077	0.447016	0.465337	0.563194	0.516141	-0.0487242	-0.118936	0.175868	-0.202549	-0.468883	-0.505295
C7	-0.603339	0.261682	-0.113363	-0.256817	-0.235553	-0.634862	0.328668	0.511019	0.649755	0.40054	0.586717	-0.470368	0.174023	0.983382	-0.473129	-0.59118	0.134226	-0.215791	-0.556518	0.330223	0.19701	-1.21166	-0.88854	-0.385602	0.487074	-0.318653	-0.278532	-0.197681	0.00706673	-0.0948429	-0.688815	0.22653	-0.573601	-1.16959	-0.491601	-1.2429	-0.490105	0.2207	-0.277977	0.0731783	0.640519	0.592218	0.929388	-0.0654459	-0.390371	0.393873	-0.965246	-0.0969019	0.148531
C8A	-0.091032	-0.209565	0.136982	0.0823736	0.45204	0.184072	0.263921	0.544755	0.441288	0.727727	0.532759	0.325885	-0.0803614	-0.125704	-0.0835838	-0.0972261	-0.0335627	0.0753508	0.444203	-0.117511	0.190324	-0.30136	-0.501902	-0.201353	-0.180064	-0.220766	-0.218766	-0.23219	-0.374907	-0.215343	-0.526322	-0.12871	-0.042593	-0.536093	-0.54177	-0.0819311	0.33976	0.284895	0.454336	0.495249	0.400657	0.249084	0.200354	-0.0603695	0.118414	0.243588	0.054347	-0.322843	-0.419615
C8B	-0.0233383	-0.00245666	0.195785	0.258244	0.474616	0.212695	-0.102664	0.431962	0.139237	0.444665	0.303684	0.457802	0.12756	-0.191557	-0.130914	-0.268566	-0.157401	-0.172293	0.303596	-0.141347	0.0118198	-0.378315	-0.57216	-0.127434	-0.119506	-0.184637	-0.12169	-0.297146	-0.234314	-0.562926	-0.935559	-0.298123	-0.205945	-0.286984	-0.542454	-0.104239	0.439884	0.210518	0.341575	0.519752	0.172143	0.106816	0.122407	-0.331521	-0.0110321	0.0507193	-0.201896	-0.504391	-0.346746
C8G	0.729562	0.493835	0.819887	0.470168	-0.679301	-0.262842	-0.984841	-0.652864	-0.89158	-0.814072	-0.936657	-1.04911	-0.141559	-0.056037	-0.00853252	0.114388	-0.295017	-0.118958	-0.527089	-0.037529	0.349076	-0.114306	0.0212784	0.344369	0.252347	0.233768	0.343337	0.38271	-0.0712423	0.414603	-0.0620012	0.301606	0.126959	0.766432	0.203309	0.496573	-0.344117	-1.24608	-0.566682	-0.474266	-0.741471	-1.0532	-0.714252	0	0.266176	0.590557	0.294928	-0.235959	0.424022
OSGIN2	0.188733	-0.0227108	0.0705743	0.24276	0.340298	-0.113152	0.256186	0.0509028	0.0731726	0.198765	-0.0908861	0.0272565	-0.00452709	-0.0272942	-0.144692	-0.165671	0.045063	-0.0278006	0.46539	-0.112204	0.0969248	-0.0819731	-0.77009	0.187613	-0.0123119	-0.479781	-0.064405	-0.319173	-0.381597	-0.24198	-0.642725	0.0133762	0.0642123	0.215929	-0.193824	0.204385	-0.0742531	0.0207734	-0.226176	0.147715	-0.00434923	0.0528893	0.279418	-0.229924	0.0884876	0.0973167	-0.105965	-0.132242	-0.296569
C9	-0.2899	-0.171774	0.34787	0.0291958	0.410565	-0.10727	0.457806	0.541506	0.213181	0.851566	0.443497	0.0813007	-0.101928	-0.166157	-0.0385876	-0.24	-0.00528145	0	0.315595	-0.362707	0.0170345	-0.390937	-0.516148	-0.327886	-0.202727	-0.685754	-0.749711	-0.225011	-0.319951	-0.594142	-0.660427	-0.0323448	-0.00724792	-0.24398	-0.990115	-0.304482	0.315719	0.0988598	0.492147	0.439432	0.2412	0.321194	0.251825	-0.362386	-0.23136	0.117022	-0.0985794	-1.03194	-0.865376
VPS51	0.0463853	0.311832	0.349927	0.0736156	-0.0413656	-0.2098	-0.333162	-0.298565	-0.427018	-0.521866	-0.432136	-0.341107	0.183353	0.0211706	0.345328	0.0789566	0.0883627	0.0747328	-0.177539	-0.113532	0.34215	-0.157857	-0.637667	0.119981	-0.178908	0.49814	0.199851	0.0736666	0.378704	0.0795193	-0.0664477	0.0679016	-0.246376	0.111131	0.182914	0.309685	-0.114082	-0.141525	-0.0575213	-0.271979	-0.174316	-0.391432	-0.368083	0.147002	-0.16107	0.285213	-0.0920396	-0.0859733	0.289135
MRPL49	0.246087	-0.0203123	0.127707	0.396638	0.0613608	-0.559092	-0.176991	-0.223028	-0.335619	-0.0455146	-0.148878	-0.343781	-0.197351	-0.305868	0.0701299	-0.00605917	-0.102252	0.0472941	0.264651	-0.262023	0.329683	-0.389286	-0.582197	0.234311	-0.124463	-0.149903	-0.127636	-0.279699	0	-0.14202	-0.590733	-0.0349174	-0.220129	0.135357	0.171492	0.39345	0.12804	0.00691271	-0.0546684	-0.0439529	-0.0201478	-0.261843	0.0269933	0.163745	0.0809846	-0.106805	0.0471921	-0.393367	-0.273296
ZNHIT2	-0.114516	0.275236	-0.0503035	-0.0567446	-0.0653987	0.202254	-0.0255594	0.0747595	0.14224	-0.168199	0.0406427	0.0261874	-0.243886	-0.0970855	0.103555	0.0450373	-0.174126	-0.0651422	-0.0951624	-0.0643697	0.0152931	-0.0596905	-0.212678	-0.202355	0.030736	-0.17152	0.145129	-0.0162368	0.116717	0.125243	0.194126	0.145684	-0.082139	0.528314	0.167981	0.214055	-0.00298691	-0.00553703	0.0693593	0.337834	0.018115	0.298159	0.0385652	-0.0510941	-0.280586	-0.10155	0.0303411	-0.368406	-0.0601425
MPPED2	-0.190626	0.0855532	-0.00517797	-0.0697322	-0.158215	0.270563	0.284432	-0.0850224	0	-0.157438	-0.146563	0.191126	0.216867	0.0956292	-0.0091753	0.162981	0.110908	0.289902	-0.240663	0.0172596	-0.0341325	0.115187	0.202559	-0.0430965	0.0193801	-0.0806284	0.0296564	-0.148729	0.0136724	0.106764	0.0949268	0.16485	-0.1516	0.148837	0.149164	0.195695	0.202515	0.136452	-0.0153031	-0.216995	-0.0225739	-0.00627136	-0.16425	-0.0313582	-0.211856	0.508842	-0.241359	0.34735	-0.0290561
MYRF	0.133978	0.299644	0.115762	0.0130453	-0.241432	-0.103147	0.114822	-0.105467	0.178396	-0.204865	-0.12583	-0.0554781	0.130016	0.333514	0.713031	0.0029397	0.183943	0.176595	0.0143323	-0.0300446	0.143634	0	-0.160266	0.24678	0.397523	0.521963	0.252578	-0.0303302	0.27681	0.208323	0.369577	-0.0115504	0.159578	0.0607986	0.170698	0.305147	-0.382972	-0.0697622	0.0204325	-0.166073	-0.0426559	-0.0764637	-0.2672	-0.00398874	-0.0163045	0.258594	0.147015	0.024467	0.0661364
TMEM258	-0.235696	-0.291594	-0.0392113	0.0587139	0.0667934	0.0288553	-0.0122595	0.151371	0.217603	0.133083	0.067729	-0.112879	0.382846	0.288479	0.437532	0.047224	0.490156	0.0707111	-0.0212231	-0.178002	0.265661	-0.178988	-0.749516	0.22306	0.0373468	-0.415167	-0.172351	-0.174804	-0.183006	-0.310912	-0.506855	0.0241604	-0.0298471	0	-0.0629015	0.0450087	-0.0689373	0.030859	0.190057	0.0678701	0.423282	-0.00665188	0.348976	0.010026	0.27657	-0.245125	0.405441	-0.26303	-0.344535
DAGLA	0.0161262	0.315028	0.056087	-0.141339	0.040256	0.436695	-0.0848856	0.0638547	0.288834	0.0311904	0.154403	0.0687485	-0.405099	0.061892	0.0957427	0.0426211	-0.0292315	0.200134	0.0305982	-0.194839	-0.106735	-0.149045	0.170632	-0.14986	-0.106972	-0.171834	0.137735	0.120087	0.0516629	-0.042141	0.0393958	0	0.0791678	0.0300999	0.0640101	-0.190776	-0.185888	0.115307	-0.101307	0.0503182	0.232858	0.169481	0.0835671	-0.234892	-0.0648942	-0.119803	-0.490422	-0.0711465	-0.104327
GAS8-AS1	-0.0187302	0.0093894	-0.0496654	-0.153214	-0.0294476	0.236969	-0.116965	-0.123991	0.0510259	-0.218671	-0.0749774	-0.284053	0.0431743	0.040514	0.042336	0.246568	0.105628	0.0152674	0.0410142	0.0119581	0.134833	-0.0565462	0.0756397	-0.0873918	0.0599871	0.120649	0.149539	0.162447	0.28701	0.0489116	0.0978031	0.0119228	-0.074708	-0.0187745	0.0603132	-0.030241	-0.0102057	-0.0404263	-0.0228	0.288888	0.00895071	-0.0527115	0.075942	0.132321	-9.68e-05	-0.0409775	-0.0850544	0.183488	-0.0972443
FMNL1	0.0774422	0.371391	0.144274	-0.0123768	-0.350278	0.157219	-0.110885	-0.300033	0.108617	-0.16824	-0.409616	-0.124094	0.0410633	0.130466	-0.0162778	-0.134468	0.141325	0.156464	-0.237031	0.0743618	-0.0144892	0.408573	0.191911	-0.00889492	0.0327873	0.153036	-0.0332623	0.374974	0.308116	0.22622	0.155074	0.146586	-0.110955	-0.0113831	0.0697231	0.0426035	-0.366287	-0.0934477	0.0329752	-0.253542	-0.152287	-0.120836	-0.336514	0.0749865	0.0557036	0.175385	0.0299687	0.0797787	0.283939
LDLRAD4	0.0578799	0.254531	0.0215545	-0.0287609	0.0874987	-0.114407	-0.158369	-0.104808	-0.13065	-0.0804052	0.189791	0.18693	0.421961	0.314298	0.0156803	0.235628	0.157728	0.427105	-0.259742	0.130927	-0.130845	-0.121542	-0.157454	-0.192584	0.00575542	0.054728	0.0947633	-0.0978532	0.217702	0	-0.0641885	-0.0583973	-0.0855579	-0.0903931	-0.116204	-0.12371	0.188383	0.153624	-0.156131	0.0597477	0.0693808	0.158504	-0.0472832	0.0659728	0.154356	0.0427937	-0.238148	-0.0104914	-0.0418668
PTTG1IP	0.357661	-0.643322	0.0113754	0.374456	0.421709	-0.448081	0.29313	-0.172507	0.0388136	-0.0741205	0.422177	0.159973	0.0634174	-0.310192	-0.05616	-0.439714	0.266851	-0.469296	-0.283384	-0.0918064	0.0998468	-0.298667	-0.469028	0.137295	-0.232426	-0.0823193	0.114555	0.206128	-0.380388	-0.324503	-0.649565	-0.27053	0.16231	0.026969	0.244651	0.000323	0.119075	0.387692	0.104446	0.0455608	0.0627289	-0.450617	-0.212426	-0.0372162	-0.0570583	-0.0191908	-0.594017	-0.162717	0.122461
C21orf2	-0.0811076	0.000192	0.11285	-0.316661	0.0155621	0.330848	0.135736	-0.0163674	0.257002	-0.385062	-0.24791	-0.046679	0.0707912	0.0828266	0.117437	0.265419	0.242379	-0.0355859	-0.123362	0.0481229	-0.174618	-0.0145297	0.341232	-0.100478	-0.0703821	0.0763135	0.0727782	-0.0972042	0.21335	0.22397	0.0652561	0.0516629	-0.0338864	0.100647	-0.0209103	0.111086	0.0915093	-0.0780554	0.0948505	0.0342593	-0.291975	0.0219793	0.0911479	-0.154974	-0.136446	-0.199271	-0.201901	-0.0989437	0.00362873
TMEM50B	-0.621805	-0.628157	-0.352194	-0.120848	0.16529	-0.158675	0.460981	0.332771	0.000524	1.04953	0.295635	0.437439	0.467009	0.239261	0.0934992	-0.332299	-0.153623	0.11022	0.56576	-0.326251	0.0625052	-0.172337	-0.851985	-0.552556	0.0573235	-0.536039	-0.526564	-0.629125	-0.636469	-0.628685	-0.595024	-0.62012	-0.576074	-0.740588	-0.593706	-0.267483	0.421586	0.378978	0.272517	0.282966	0.432555	0.381817	0.105671	-0.000755	0.733034	-0.47059	0.0290566	-0.0413613	-0.432164
MPPED1	0.0367346	0.0847549	-0.167504	0.0531774	-0.17089	-0.315732	-0.188664	-0.638142	-0.252275	-0.923917	-0.308318	-0.269049	-0.146764	-0.079596	0.0496645	0.253572	0.0588851	0	-0.179695	0.00352287	-0.0957966	-0.0020442	0.366756	0.0916915	0.174526	0.184099	0.0893106	0.249767	0.09587	0.108434	0.230522	-0.150246	0.340636	0.412772	0.229733	0.390211	-0.269379	-0.211502	-0.12643	-0.253878	-0.249725	-0.286725	-0.308196	-0.0781207	0.12049	-0.0975437	0.356219	0.429772	0.0681133
CA1	0.0461974	-0.0461831	-0.0636396	0.0905747	-0.0653849	-0.00460768	0.0157404	0.0121655	0.00304556	-0.117104	-0.0377045	0.191119	-0.137941	-0.0222802	-0.00952435	0.00812149	0.0153556	0.100434	-0.0847516	0.0354638	0.0965161	0.0873313	0.0414057	0.256023	0.0907264	-0.0553145	0.0690646	-0.0268698	0.271794	0.0737119	0.0433512	-0.0184102	0.0584488	0.0105658	-0.0552397	-0.034265	0.120535	0.0387602	-0.0582409	-0.183362	-0.0329947	-0.0850391	-0.0534043	-0.00206947	0.00361252	-0.131202	0.161294	0.0243187	0.0732365
CA2	0.107236	0.0883246	-0.307305	-0.0846014	0.354936	0.314278	0.300396	0.423252	0.255765	0.090313	0.0603514	0.237672	0.208251	0.14208	0.491899	-0.183713	-0.0336943	0.567962	-0.229733	-0.267362	-0.0154095	-0.286954	-0.123945	-0.0315866	-0.181287	0.14761	-0.22413	0.0664539	0.522808	-0.469234	-0.262225	0.020258	-0.378982	0.0248575	0.444069	-0.306793	0.550199	0.366627	0.0603485	-0.0507078	0.229663	0.0133619	-0.0441608	0.399455	-0.472937	0.594527	-0.186619	-0.283814	0.110604
CA3	-0.0148797	0.173119	0.0805306	-0.0767627	-0.19415	0.369066	0.0297284	-0.111722	-0.165672	-0.127296	0.167159	0	-0.16269	-0.215026	0.189679	0.147969	0.00179625	-0.0652351	0.0764546	-0.20006	-0.303846	-0.210064	0.228977	-0.195642	-0.170295	-0.0986218	-0.0973387	-0.301844	-0.0442619	0.372593	0.00866604	-0.135077	-0.0877352	-0.0578446	0.205014	0.0221739	0.0565605	0.126638	0.139768	-0.095057	0.00124741	0.263506	-0.0409069	-0.114781	-0.164204	-0.0479169	-0.108605	-0.00423574	-0.09375
CA4	-0.121487	0.194853	-0.125581	0.0263662	-0.117082	0.173065	0.0572867	-0.0282741	-0.0316339	-0.175048	-0.0863504	0.0210576	0.0629096	0.0278983	0.031467	-0.00575972	-0.345894	-0.0166769	-0.136921	0.0250692	-0.213323	0.0681062	0.0770845	0.113138	-0.210872	0.14642	0.125489	0.246995	0.0643749	0.0864582	0.196958	0.216514	0.155188	0.348805	0.0656161	-0.101746	-0.0165815	-0.0880413	0.0301051	0.103806	0.166788	0.0994511	0.00264788	0.0916457	-0.00157356	-0.125583	-0.0478129	-0.0999284	0.0814033
CA5A	0.0667696	-0.311331	-0.316493	-0.318102	0.153791	0.0119324	0.264494	0.136622	0.354177	-0.208711	0.392875	0.133977	0.000419	-0.202057	0.32233	-0.0104904	0.489526	-0.299938	-0.117179	-0.324548	0.178518	-0.152176	-0.0801935	0.37256	-0.067419	-0.332784	-0.175197	0	0.0499315	-0.195457	-0.143516	0.0394249	-0.328914	0.322792	0.108591	-0.00677586	0.105362	0.278391	0.353168	0.11377	0.588542	-0.0604572	0.180225	-0.00859356	-0.190782	0.216594	0.143067	-0.113043	0.0688162
CA6	0.525115	0.267246	0.238523	-0.0324111	0	0.215569	-0.131909	-0.071794	0.238439	-0.19606	-0.0435104	0.00886345	-0.0963874	0.000259	0.150703	-0.00818586	-0.00841141	0.0224056	-0.0609517	-0.0399098	-0.260502	0.0299921	0.179574	-0.0969601	-0.0924997	0.070724	0.0390401	0.134412	-0.0180082	0.234142	-0.0526052	-0.175486	0.028717	0.20215	0.105182	-0.0918798	0.126672	-0.0956583	0.0888672	0.0939507	0.0774837	0.234142	0.0715914	-0.125169	0.0129843	-0.0611906	0.110059	0.0645704	-0.0369086
CA7	-0.207423	-0.0293603	-0.175104	0.0434108	0.0176754	0.164243	-0.154143	-0.101514	0.0616665	-0.251328	-0.256056	-0.191064	-0.184806	0.0112596	0.112769	0.199109	-0.048708	0.351346	-0.211567	0.053504	0.00398779	-0.00630426	0.204664	-0.0875254	0.0617542	0.180207	0.0587568	0.0982866	0.321949	0.235865	0.408178	0.0196929	0.0475287	0.149524	0.0279222	0.176738	-0.0312166	-0.077054	-0.181652	-0.150915	0.0479197	0.235062	0.0698085	0.0357313	-0.132831	-0.0790491	0	0.0762048	0.0165343
CA8	0.00803471	-0.0535302	0.0184383	0.0625157	-0.0980916	-0.0388923	0.00163269	-0.00302935	0.00542164	-0.0326328	0.0222197	-0.0533237	0.0139523	-0.0185089	0.130854	-0.0305433	0.0249591	0.132976	-0.0331802	0.129807	0.0205145	-3.34e-06	0.15292	0.0559731	-0.0378876	0.217295	0.0418334	0.127215	0.021203	0.300592	0.0763087	0.06392	-0.0316472	-0.051137	-0.000668	0.0028429	0.00243187	-0.0328641	0.0459971	-0.118838	-0.00648117	0.00377369	0.0138683	0.0989699	-0.0164957	-0.0328817	0.130555	-0.0544982	0.00158834
CA9	-0.0718813	-0.291782	0.041059	-0.100339	0.0589743	0.437763	0.0757894	0.030086	0.206809	-0.300852	0	0.258821	-0.236438	0.102569	0.248968	-0.11764	0.146252	-0.117277	-0.302688	0.0743117	-0.284089	-0.0386429	0.216271	-0.00332117	-0.00800705	0.122629	-0.0661182	0.210106	-0.186107	0.061307	0.221675	0.104985	0.130882	0.0655942	0.043839	-0.103684	0.213287	0.0110793	0.350952	0.0384588	0.149425	0.187142	0.0260143	-0.0920758	-0.263139	-0.660841	-0.0842795	-0.0761085	0.166064
CA11	-0.0103989	0.0442166	-0.136321	-0.07898	-0.056603	0.269729	0.00677586	0.0222316	0.27258	-0.175908	-0.0165863	-0.0188661	-0.0637388	0.263167	0.146504	0.0563874	0.242015	0.083405	0.00677586	0.00131941	-0.193998	0.0670023	0.169156	-0.0286059	0.0849309	-0.143888	0.0390573	-0.0257158	0.0575509	-0.00363636	0.258675	0.127843	-0.0556002	0.244132	-0.0143533	-0.145144	0.0713086	0.217425	0.152367	0.1844	0.234417	0.163969	0.102079	-0.0335326	-0.234365	-0.150938	-0.307596	-0.00737476	-0.166923
CA12	0.161407	0.387264	-0.131743	0.27562	-0.00594664	-0.25512	0.602037	-0.165073	-0.319152	-0.389258	-0.0802164	-0.069665	-0.243926	-0.252361	0.113618	-0.0659375	-0.115607	-0.111408	-0.008358	-0.00330353	0.00847292	0.296726	0.242377	0.0252318	0.197368	0.190685	0.41019	0.11005	0.426555	0.50201	0.376923	0.104176	0.0288639	0.410268	0.674927	0.313325	-0.0664701	-0.00383377	-0.101438	-0.0347552	-0.340128	-0.147741	-0.219987	0.0437303	-0.072104	0.0867643	-0.13062	-0.0482359	0.126246
CACNA1A	-0.0782666	0.169206	-0.0698714	-0.0298781	-0.0246158	0.298795	0	-0.0158563	-0.0741324	-0.24622	0.0346031	-0.0529504	-0.0865531	0.0565057	0.0375366	-0.0390582	-0.0785632	0.0877428	-0.0354753	-0.130447	-0.203794	0.0975938	0.072947	-0.0249162	-0.00119782	-0.0404768	-0.00303459	-0.000174	0.105347	-0.0659423	0.0867667	0.134511	0.0165911	0.105787	0.0588918	0.0561218	-0.0207028	-0.0357633	0.128137	0.0528593	0.096519	0.0476418	-0.0111055	0.0253406	-0.181582	-0.0444551	-0.00888395	-0.109972	0.0432038
CACNA1B	0.200803	0.337052	-0.0740757	0.0657926	0.0230117	-0.00490761	-0.107874	-0.132078	0.0419936	-0.229475	-0.235631	0.0199552	-0.159036	0.0846295	-0.127655	-0.176212	-0.155823	-0.0285592	-0.0980463	0.0758223	-0.113914	0.00813436	0.231329	-0.0549893	-0.0410557	-0.20771	0.057776	0.15517	0.152322	0.200406	0.199367	0.0643535	0.259006	0.0996475	0.0569968	0.0635409	-0.112381	-0.141896	0.0522995	-0.0667682	-0.0193272	0.114905	0.0315499	0.104988	-0.0926147	0.0449724	-0.114784	-0.0611224	0.0647998
CACNA1C	0.0118828	-0.0392952	-0.0129976	0.0114884	-0.188957	0.254303	-0.0461607	0.0655675	0.130998	-0.0295577	-0.166554	-0.102082	0.116088	0.230337	0.290092	0.238896	0.0618	-0.0669403	-0.0924468	0.30951	-0.137791	-0.0247636	0.400889	-0.116001	0.252743	0.0100775	0.0668545	0.262588	0.0907574	0.136195	0.0514298	-0.00506592	0.0490689	-0.0282979	0.063158	-0.0207639	-0.171696	-0.0203853	0.00154114	-0.140601	0	-0.190006	0.0342917	-0.0569863	-0.127969	0.154005	-0.00547647	0.167647	0.179178
CACNA1D	-0.0578456	0.0695944	0.105068	-0.192211	-0.134456	-0.0140667	-0.0967064	-0.336625	-0.165602	-0.0730515	-0.185202	0.179821	-0.00269413	0.207376	0.0996242	-0.109349	0.0884891	-0.133838	0.102865	0.0612388	0.208418	-0.193221	-0.16601	0.0183682	0.265939	0.233102	0.123122	0.304202	0.188937	-0.0868492	0.272528	0.0347033	0.133629	0.0363212	-0.241715	-0.357307	0.0244398	0.295455	-0.154829	-0.0197787	0.01197	-0.282752	-0.128756	-0.0823007	0.150442	-0.0184302	0.208902	0.00192213	-0.180685
CACNA1E	0.0872164	0.02703	0.011508	-0.116279	-0.0374494	0.14506	-0.137463	0.0553942	-9.68e-05	-0.208303	-0.124183	0.0222845	-0.11987	-0.0416503	0.0651159	-0.0548158	0	-0.0844598	-0.0445266	-0.0151796	-0.0237594	-0.0235233	0.333855	0.0112505	0.12848	0.0843515	0.0983043	0.0940266	0.113032	0.13832	0.155757	-0.0853467	-0.0825534	-0.0243406	-0.169387	0.133226	-0.0243244	-0.0623989	0.0622911	0.014833	0.0927587	-0.0449157	-0.0381851	-0.00540066	-0.177303	-0.194627	-0.0223284	0.024652	-0.0877323
CACNA1F	-0.052557	0.12045	0.110225	0.1328	-0.129046	0.125342	-0.207513	0.106309	-0.0319996	-0.147642	-0.171364	-0.0194511	-0.0240216	-0.0647793	0.0717831	0.131634	-0.0410523	0.0616512	-0.142746	0.00286055	-0.179482	0.034317	0.393507	-0.208282	0.0428376	-0.0193763	0.117608	0.159641	0.153285	0.276547	0.154962	-0.205324	0.101749	0.135519	-0.206527	0.00441647	-0.011816	-0.153739	-0.0436816	-0.0905809	-0.0269728	0.0726929	-0.179272	-0.00809956	0.0861168	-0.156077	-0.233249	-0.0345826	0.0688777
CACNA1S	-0.0429888	0.403966	0.124343	0.00330162	-0.0351782	0.196362	-0.0526381	0.00507402	-0.0233164	-0.187169	-0.235874	-0.123284	-0.0491228	0.0445361	-0.0624843	0.190675	-0.0494456	-0.091403	-0.0706644	-0.0077343	-0.0892334	-0.0148988	0.494194	0.0102601	-0.010293	-0.152502	0.000663	-0.0670524	0.0816112	0.0861936	0.216451	0.0184498	0.123779	0.127298	0	0.242318	-0.00174808	-0.0210671	-0.192992	0.0399132	0.0535974	0.16767	0.0645309	0.0443554	0.0852661	-0.199953	0.0611906	-0.0486441	-0.0245123
DDR1	-0.174966	0.14741	-0.105595	-0.00504017	-0.0713897	0.152802	-0.196084	-0.192848	0.0463338	-0.312025	-0.174319	-0.123892	0.245695	0.322247	0.15282	0.393831	0.232159	0.377964	-0.206079	0.448462	0.1012	0.032372	0.0229812	-0.0263147	0.23366	0.0661941	0.0287867	0.115723	0.421115	0.189816	0.344972	0.282486	0.0685258	0.0213251	-0.0335398	0.0772591	-0.27597	-0.194104	-0.173242	-0.0107646	-0.0832696	-0.011148	-0.162075	0.0492072	0.0967183	0.279052	0.00417185	0.269666	0.450116
CACNA2D1	0.0036006	0.267731	-0.0939474	-0.033021	-0.0550933	-0.171386	-0.0149407	0.169853	0.051928	0.210031	0.098917	0.0772161	0.259125	0.129904	-0.0396066	0.0662971	-0.0828519	0.146963	-0.0773892	0.0979767	0.00218487	-0.252638	-0.000599	-0.22212	-0.0431652	-0.324952	-0.0506201	-0.0427175	-0.139788	-0.0807862	-0.140401	0.0806232	-0.142924	0.0226388	0.0517139	-0.141417	-0.298116	0.0220289	-0.150299	-0.0206594	0	0.0198312	-0.0657511	0.058187	-0.0493326	0.29617	0.00411844	-0.029469	-0.0529714
CACNB1	0.0275788	0.302539	-0.124431	0.0549059	-0.143043	0.262206	-0.124058	-0.0539532	-0.0249157	-0.054183	-0.19452	-0.148759	-0.27718	-0.0597639	0.000732	-0.26233	-0.0594587	-0.117992	-0.151676	-0.00137997	0.0489531	0.0387979	-0.0194178	0.015944	-0.00155115	0.11153	0.043808	0.289086	-0.0444798	0.0135899	-0.0469942	0.227641	0.015583	0.24226	0.158489	0.081707	-0.283177	0.0657482	0.00751686	-0.102415	-0.14979	0.0255771	-0.0457945	0.0305696	0.0550513	-0.0919228	-0.06492	0.32238	0.0141473
CACNB2	-0.148337	0.0313902	-0.264073	0.110813	0.261296	-0.0397234	-0.444576	0.0199208	-0.0190616	0.071826	-0.136198	-0.233812	0.418928	0.254839	0.388033	0.317619	0.321468	0.297563	-0.253292	0.0396237	-0.4067	-0.408875	0.459342	-0.0684767	0.208066	-0.109605	-0.074532	-0.032443	0.356616	0.185565	-0.184451	-0.350479	-0.207426	-0.0178914	0.157406	0.323133	0.205678	0.458454	0.116717	0.290322	0.173937	-0.168833	0.208273	0.654718	0.0522046	0.725562	-0.153557	0.0294418	0.213586
CACNB3	-0.135893	0.100156	-0.0685887	0.0461988	-0.0194139	0.170005	-0.252012	-0.0956793	0.166059	-0.160174	-0.114848	-0.0940213	-0.0270042	-0.0823288	0.108796	0.177237	0.106611	-0.00744343	-0.0731063	0.302255	-0.107804	0.0504808	-0.100862	-0.0733471	-0.0465088	0.103658	0.111431	0.34106	0.191518	0.218259	0.302943	-0.166107	0.125544	-0.0436029	0.100709	0.102956	-0.0582671	-0.169757	-0.182761	0.0338192	-0.0126891	0.0402851	0.0162735	0.038959	-0.0836267	0.0103855	0.0554247	0.133325	0.0849242
CACNB4	0.0140634	0.313895	0.0352674	0.114131	-0.0749569	0.155139	-0.0409894	0.0133486	0.0466528	-0.303325	-0.175195	0.0622191	-0.15331	0.0381408	0.0519462	-0.134824	-0.0047574	-0.0592003	0.00559998	0.0166211	-0.165247	0.12114	0.095192	0.0444341	-0.000583	-0.0288215	-0.0418892	-0.0609975	0.34326	0.0854192	0.142468	-0.0216241	0.160512	0.192896	-0.0146141	-0.0893364	-0.0113811	0.140674	0.0477324	0.10337	0.225475	-0.0273986	0.0639744	-0.0437493	-0.201993	-0.135264	0.0173411	0.106766	-0.0596905
CACNG1	-0.031764	0.162145	-0.13677	0.0675845	0.0102959	0.271712	-0.0529051	-0.0665302	0.011651	-0.177789	-0.0720854	-0.134959	-0.138249	0.0283785	0.0808244	0.11662	-0.0953469	-0.0906124	-0.025877	-0.029418	-0.095264	0.00802851	0.0881143	0.0304065	-0.0429087	0.0445218	0.144915	-0.029954	0.194616	-0.114047	0.234041	-0.173716	0.0036993	0.311292	-0.0468721	-0.017808	0.0821195	-0.232489	-0.0368104	0.0669975	0.0531874	0.0747414	-0.0636291	0.0603051	0.0618205	-0.0700774	-0.0975194	0.136348	-0.131685
SLC25A20	0.277742	-0.100315	-0.293382	0.172328	0.61727	-0.177902	0.170677	0.131351	-0.0415745	0.212763	0.295917	0.169134	-0.0931635	-0.356241	-0.182023	0.229937	0.105154	0.0644026	0.461086	-0.208933	0.0838652	-0.424059	-0.905207	0.201626	-0.137965	0.026865	0	-0.22751	-0.550092	-0.170353	-0.683227	-0.56128	-0.289699	-0.153177	-0.163739	0.308187	0.21417	0.501241	0.332376	0.357972	0.393945	-0.00581455	0.0431032	0.0069952	-0.103933	-0.353667	0.121212	-0.526831	-0.548587
CAD	-0.247964	-0.0798764	-0.280271	0.0524893	-0.179621	-0.138443	-0.190206	-0.295343	-0.185934	-0.15633	-0.215926	-0.23596	-0.0228577	0.238968	0.178751	0.142776	0.152489	0.139208	-0.0280147	0.240618	0.254234	0.00921488	0.198868	-0.036973	0.0341425	0.19096	0.0162215	0.16138	-0.00670242	0.0742326	0.323939	0.0835638	-0.0450125	-0.176025	-0.0073328	0.0449066	0.0411925	-0.17059	0	-0.249681	-0.31102	0.0184002	-0.195668	0.102367	0.193379	0.090476	-0.0137329	0.0552974	0.174325
CALB1	-0.0517387	0.0394783	-0.00102139	-0.0644379	0.0705009	0.00667477	0.014143	0.0333633	0.451441	-0.0443945	-0.0310283	0.0787744	-0.133395	-0.0586586	-0.018641	0.0398097	0.0136623	0.0446658	-0.146063	-0.0884471	-0.0844989	0.0222688	0.32458	-0.0723033	-0.0985212	-0.143166	-0.110087	0.157294	-0.0635142	-0.123686	0.160175	0	-0.0143023	0.138222	0.0901456	0.170805	0.13738	0.0561504	0.0337267	0.058888	-0.090611	0.0104713	0.0923414	-0.0852499	-0.107905	-0.126836	-0.00992012	0.129976	0.0628119
CALB2	-0.0843439	-0.114374	0.147894	0	0.0591092	-0.0128932	-0.058166	-0.117784	0.0187373	-0.209437	-0.0516348	-0.108356	0.155695	0.0376062	0.259998	0.313585	-0.0426502	-0.16036	-0.0721598	0.25811	-0.129694	-0.072217	0.293122	-0.0063138	0.0935636	-0.104867	-0.0215969	0.0935144	0.0592513	0.282914	-0.0033164	-0.0314522	0.166055	0.133437	-0.0173588	0.0196285	-0.0514064	0.061234	0.00836229	0.0548253	-0.114589	-0.0241947	0.169442	-0.037899	-0.00607395	-0.0999227	-0.0688934	-0.11334	0.114692
S100G	-0.0485621	0.0319953	0	0.0428162	-0.0758686	0.0270491	-0.0325875	0.0123281	-0.00678301	0.034421	-0.0265036	-0.0182266	-0.000217	0.106618	0.123482	0.0269995	0.00782585	0.162722	-0.0121465	-0.0275049	0.00399923	0.05687	0.371826	0.0470042	0.0304823	0.039217	0.0383248	0.213516	0.0904927	0.0605392	0.0229936	0.0657053	0.00574255	-0.0127068	0.0285869	0.0359616	-0.0728612	0.0200391	0.1286	-0.0306387	0.0319118	-0.000497	-0.00139141	-0.035656	-0.0213833	6.96e-05	0.0866241	-0.0150032	-0.0126681
CALCA	-0.0674334	0.236327	0.138524	-0.0775833	0.0915012	0.487337	0.0230312	-0.00365543	0.237655	0.108408	-0.0575981	-0.0671673	-0.110672	0.0432324	0.0307927	-0.192884	0.0241652	-0.348055	-0.176187	0	-0.0186143	-0.0135183	0.438534	-0.130385	0.00985909	-0.151	-0.0374556	0.161588	0.0238361	-0.131074	-0.0308514	0.198651	0.147581	0.218631	-0.121295	-0.147282	-0.0232944	-0.0911574	0.148608	-0.128965	-0.0585461	-0.0826621	0.100325	-0.209577	-0.12183	-0.309934	-0.0568829	-0.0182996	0.0664301
CALCB	0.0563092	0.452892	-0.240164	-0.0143356	0.254014	0.25905	-0.174197	0.0842776	-0.0413403	-0.0577207	-0.0737972	-0.0428324	0.0370545	-0.193168	-0.0492787	-0.261016	-0.0695457	0.248654	-0.198335	-0.0920358	-0.261806	0.291057	0.0562034	-0.00807238	0.522639	0.159624	0.231509	0.1218	0.491112	0.151996	0.0960469	-0.0363474	0.0506978	0.0958018	0.0154099	0.116247	0.0449181	0.161537	-0.042675	-0.0255151	0.176914	0.226308	0.257404	0.133501	-0.252948	-0.342845	-0.295405	0.0939527	0.0725389
CALCR	0.126948	0.143175	0.0202074	-0.0442061	-0.072916	0.154728	-0.0165534	-0.0917454	0.109138	0.0291514	-0.136462	0.0467334	-0.0228386	-0.00372076	0.272714	0.128319	0.0756254	0.0484166	-0.0690913	-0.0920901	-0.197743	0.00712347	0.401516	-0.0918779	-0.0909705	-0.0479994	-0.00180387	-0.117813	-0.0171027	-0.0524821	0.0229054	0.00751495	-0.130538	0.0842471	0.0103111	0.0597878	-0.0923619	0.0187945	-0.0698261	0.118559	-0.0259867	0.102805	-0.00308037	-0.109773	-0.0596662	0.00682354	-0.0953898	-0.113988	-0.0955148
CALD1	-0.0370226	-0.0659523	-0.271249	-0.12794	0.280533	-0.0338211	0.315996	0.22996	0.171612	0.489187	0.407134	0.453032	-0.000997	0.0917425	-0.412332	-0.0459442	0.169368	0.135312	0.205921	0.0524282	-0.0234013	-0.328276	-0.140762	-0.191627	-0.127774	0.154587	-0.266353	-0.127303	-0.0325947	-0.0683174	-0.332117	-0.217403	-0.162831	-0.258834	0.125757	-0.108199	0.259757	0.101961	0.105199	0.203163	0.188938	0.0764599	0.151772	0.0483618	-0.142081	-0.0528917	-0.0501137	-0.371449	-0.185687
CALM1	-0.210206	-0.244328	-0.0761023	-0.0363951	0.0380144	0.127316	-0.139574	0.119192	0.0121689	0.349123	0.348983	-0.0140638	0.10975	0.313494	-0.0745888	0.053853	0.17508	-0.106881	0.226408	0.0268984	0.161888	-0.17536	-0.333093	-0.0816746	-0.0893116	0	-0.255418	-0.0483313	-0.45584	-0.307317	-0.550358	-0.190291	-0.165347	-0.196117	-0.197887	-0.206376	0.0269289	0.171998	-0.0622787	-0.0522099	0.0500507	-0.00910377	0.115618	0.199933	0.334846	0.146327	0.0747032	-0.109797	-0.170415
CALM2	-0.216301	0.0734758	0.121824	-0.0418949	0.541151	0.0838518	0.414969	0.637734	0.193713	0.806115	0.429275	0.62993	-0.504636	-0.219218	-0.592609	-0.424665	-0.293791	-0.346811	0.427187	0.253666	0.0513554	-0.472527	-0.0440235	-0.253624	-0.0161972	-0.173434	-0.430257	-0.407149	-0.125308	-0.274309	-0.277206	-0.191648	-0.125515	-0.637694	-0.681989	-0.528861	0.479153	0.36009	0.219038	0.312206	0.30445	0.359944	0.508973	-0.170008	0.103054	0.15155	0.031292	-0.209621	-0.549338
CALM3	-0.0695429	-0.361531	-0.288687	-0.237361	0.143893	0.214776	0.161704	0.173718	0.28778	-0.0459833	0.257409	0.117854	0.109623	0.00335121	0.196198	0.157399	0.180841	0.354052	-0.0591793	-0.00440788	0.364536	-0.149525	-0.0319805	0.231599	-0.149602	0.0595102	-0.00990963	-0.0333757	-0.0729389	-0.361849	-0.283012	-0.0587254	0.0251579	-0.0101614	-0.29172	-0.142073	0.0257912	0.199565	0.196007	0.0339775	0.151633	0.208061	0.0781822	0.296525	0.411856	0.252215	-0.175406	0.167233	0.359522
CALML3	-0.0123234	0.276238	0.00810957	0.184502	-0.0255456	0.366122	-0.0125737	-0.0486841	-0.120053	-0.0862637	-0.135654	-0.162683	-0.252052	-0.267566	0.0736327	0.0105734	-0.0132585	-0.108981	-0.111979	0.0614219	0.0385103	0.0110373	-0.0500331	0.0765481	0.178746	0.102829	0.309886	-0.0850797	0.0998802	0.253687	0.245719	0.107978	0.374346	0.141595	0.0301733	0.295158	0.00044	-0.224864	0.203795	0.00609255	-0.0591311	0.0300145	-0.0494766	0.110956	-0.109041	0	0.0477233	-0.0588312	0.149893
CALR	0.0147171	-0.312769	0.0452099	0.203509	0.179358	0.384544	0.141029	0.301323	-0.0200462	0.147791	0.447306	0.0942507	-0.353661	-0.394629	-0.27142	-0.279578	-0.0493774	-0.515417	0.186893	-0.0697517	0.219147	-0.579808	-0.250711	0.0423088	-0.284336	-0.0336733	-0.107342	-0.28757	-0.393477	-0.302396	-0.506367	0.0259676	-0.139297	0.0262041	0.171507	0.086442	0.160152	-0.00180626	0.208685	0.303502	0.480749	0.241963	0.0708713	-0.166203	-0.0373278	-0.154443	0.246304	-0.648483	-0.519608
CALU	-0.265567	-0.495107	-0.10644	-0.00401974	0.431862	-0.214179	0.100412	0.252719	-0.0962768	0.667465	0.413342	0.473245	-0.233321	-0.531271	-0.43121	-0.448465	-0.382955	-0.360867	0.373924	-0.124711	-0.0045681	-0.226449	-0.69942	-0.249296	-0.191185	-0.243574	-0.139693	-0.308815	-0.549396	-0.223481	-0.419445	-0.0952778	-0.080688	-0.463136	-0.264429	-0.176429	0.43143	0.208811	0.12688	0.385318	0.465149	0.0728946	0.387949	-0.116439	0.313215	-0.161121	0.11413	-0.919133	-0.414279
CAMK4	0.0524116	0.0998073	0.109245	0.153276	0.0310168	0.255	0.0186505	-0.0710244	-0.0145407	0.296393	-0.10106	0.0278883	0.126341	-0.0811935	-0.21705	-0.20393	0.260594	-0.122064	-0.12202	0.0652409	0.119572	-0.12796	0.00591564	0.361012	-0.0100136	-0.233367	0.271321	0.198397	0.270946	0.0732779	-0.313326	0.363873	-0.000443	0.0515676	0.058959	0.172312	-0.254731	-0.0583253	-0.236346	-0.0280647	-0.164963	0.167117	0.14278	0.369386	-0.129497	0.391549	0.182225	0.0942445	0.355751
CAMK2A	0.158777	0.111504	0.0393877	-0.124253	0.0445099	0.485887	-0.139601	-0.0320516	0.158715	-0.171319	-0.0489359	-0.11672	-0.240858	-0.272001	-0.113779	0.10689	-0.158669	0.00290775	0.00132418	-0.0651731	-0.182396	0.160469	0.123781	-0.299546	-0.0210238	-0.198486	0.147444	0.0791354	-0.0205741	-0.164344	0.152624	-0.169554	0.259357	-0.242701	-0.106042	-0.129729	0.151647	0.0907507	0.154213	-0.179797	-0.175943	0.30898	0.032249	-0.109177	-0.322739	-0.0797896	-0.209652	0.0380373	0.19638
CAMK2B	0.14698	0.185201	-0.0191526	0.00342941	0.017983	0.375072	0.275946	-0.0203104	0.196746	-0.150767	-0.157544	0.109787	0.201852	0.253599	0.321465	0.272543	0.292036	0.25825	-0.061336	-0.0311522	-0.105276	-0.171307	0.0906739	-0.231193	0.0832133	0.112088	0.26337	-0.0551171	-0.0666413	-0.190548	-0.110231	0.187599	0.0896592	0.0359468	0.0485973	0.187924	-0.00158787	-0.0599513	-0.040236	-0.159627	0.0502105	-0.083705	-0.04772	-0.0705762	-0.18765	-0.302679	0.301155	0.320382	0.246898
CAMK2D	0.127546	-0.0547147	0.288826	-0.0602207	0.136258	-0.282151	0.0189261	0.0443201	-0.114783	0.242418	0.240012	0.175575	0.0898185	-0.0348806	-0.418613	-0.309329	0.087245	-0.0720043	-0.104737	-0.172543	0.120655	-0.335097	-0.14551	-0.0477047	-0.160347	-0.123375	-0.21717	-0.267782	-0.0852313	-0.171708	-0.568014	-0.116384	-0.157802	0.173042	-0.0799355	0.0852551	0.0596056	0.0615311	0.0715504	-0.0178733	-0.144282	0.321976	0.151393	0.117776	-0.283676	0.172727	-0.501887	-0.0657592	-0.327919
CAMK2G	0.284623	0.164552	-0.104484	0.142921	-0.173264	-0.0202856	0.0785623	-0.179694	-0.0462666	-0.288803	-0.0795736	0.0807371	0	0.121251	0.204594	0.201241	0.242343	-0.059433	-0.00704098	0.107843	0.0256157	-0.0893326	-0.0307813	0.316981	0.178248	0.338006	0.024797	0.141915	-0.0551939	-0.0730247	-0.078752	0.0846786	0.0686202	-0.0648618	0.0579352	0.132807	-0.208006	-0.0439105	-0.0672598	-0.119483	-0.0723724	-0.275033	-0.191253	-0.0214229	0.108773	0.149777	0.0506501	0.0540729	0.301548
CAMLG	-2.34e-05	0.250154	-0.112657	-0.0325041	-0.0598145	-0.316184	-0.19294	0	-0.264074	0.287239	0.0558929	-0.164392	0.124514	-0.165542	0.052422	-0.151018	-0.0160317	-0.0286665	0.117584	-0.0635958	0.07687	-0.163602	-0.36122	-0.105672	-0.0856681	-0.11974	0.00787878	-0.079946	0.126291	-0.00194311	-0.274342	0.0181227	-0.201146	-0.0787764	0.113971	-0.0608401	0.0284424	-0.0989637	0.0731235	-0.149593	-0.0375834	-0.0721808	0.124692	-0.115177	0.163885	0.154767	-0.0145259	-0.0804973	-0.163052
CAMP	-0.0955281	0.0886836	0.0819621	0.0417371	-0.107039	0.102018	-0.0984788	0.117705	0.0377755	-0.129599	-0.201357	-0.0233879	-0.382207	-0.188899	0.0975671	-0.131848	-0.162079	0.0787692	-0.0422564	-0.0713797	-0.0886984	0.0530262	0.213697	-0.0368662	0.13522	-0.226472	-0.155718	-0.0231457	0.108254	0.067905	0.0931926	0.130832	0.107233	-0.0261698	-0.15241	0.0988388	0.0780773	-0.0939751	0.00311422	0.0953531	0.0215459	0.177	-0.0945988	-0.155404	-0.267438	-4.29e-05	-0.125374	0.138542	0.103728
CANX	-0.084836	-0.0723391	-0.134903	0.13205	0.231171	-0.133352	0.135048	0.249218	0.0160742	0.192828	0.354524	0.208143	-0.123009	-0.260542	-0.181856	-0.245457	-0.0563612	-0.114997	0.341526	-0.330361	0.0301065	-0.472718	-0.391415	-0.119781	-0.219275	-0.325544	-0.259544	-0.483036	-0.566704	-0.556426	-0.892259	-0.21209	-0.137733	-0.0797234	-0.139857	0.0561237	0.326702	0.0275526	0.0996428	0.173173	0.228419	0.247789	0.186028	-0.331512	-0.369076	-0.249951	-0.246884	-0.675263	-0.685202
CAPG	-0.0729814	0.0294886	0.221179	0.0290947	0.170657	0.114729	-0.0280676	-0.100531	0.00636864	0.163776	0.143421	-0.0649362	-0.0630636	-0.0921731	-0.023695	-0.23946	0.0604358	-0.12589	-0.0145569	0.261498	0.0179434	-0.13123	0.198274	-0.00756168	-0.196622	-0.159216	0.123398	0.0907078	0.21608	-0.00666285	-0.136822	0.079165	-0.0670061	-0.108507	-0.0365281	0.257083	-0.07091	-0.0475163	-0.0493674	0.222329	-0.109212	0.118171	-0.0322423	0	-0.290553	-0.230006	-0.00805569	-0.0364699	0.0634017
CAPN1	0.159904	0.069818	0.162105	0.148878	-0.430556	-0.434997	-0.224281	-0.406226	-0.725741	-0.381373	-0.291446	-0.660612	0.145053	0.0845156	0.210579	-0.0232177	0.141225	0.255085	-0.284558	0.0405602	0.347964	-0.323478	-0.285186	0.10505	-0.0930448	0.251766	0.100807	-0.0142622	0.131783	-0.0778751	-0.0821142	0.226016	-0.499946	0.20372	0.0923543	0.442667	-0.337066	-0.494287	-0.406393	-0.286283	-0.208516	-0.484265	-0.454864	0.0165949	0.114889	0.167272	-0.172211	-0.0754852	0.268076
CAPN2	-0.091825	0.0527163	-0.157923	0.110234	-0.310289	-0.71644	0.103435	-0.153654	-0.0663219	-0.190317	-0.277342	-0.222907	0.0307045	0.2349	-0.204155	0.156924	0.109647	-0.0865345	-0.0305843	0.244517	0.0380187	-0.260108	-0.295639	-0.226634	0.40857	-0.0128331	-0.161034	0	-0.12683	-0.218009	0.137284	0.331287	-0.215238	0.0371079	-0.438965	0.298091	-0.168208	-0.350036	-0.367736	-0.216773	-0.156295	0.0236559	0.217077	0.11317	0.276516	-0.128558	-0.142635	-0.206738	-0.0698428
CAPNS1	-0.0129232	-0.170407	-0.391074	0.0565634	0.334517	-0.22051	0.100497	0.121698	-0.119153	0.176148	-0.0505238	-0.0758057	0.610644	0.208094	0.260535	0.233363	0.388906	0.304771	0.258901	-0.138063	0.0785465	-0.341154	-0.837909	-0.262318	-0.246404	-0.17505	-0.283517	-0.117677	-0.123621	-0.00155163	-0.173691	-0.1252	-0.328564	0	-0.165228	0.0600691	0.104473	0.0899315	-0.0508814	0.332769	0.243533	0.0811691	0.0213308	-0.281114	-0.156845	-0.0315256	-0.096427	-0.452269	-0.188229
CAPN6	-0.164467	0.276917	-0.196054	-0.0888529	-0.0137405	0.276503	0.0522246	0.0440903	0.0786991	0.0619059	-0.108229	-0.0363693	0.149606	0.172741	0.103511	-0.0915437	-0.0922384	0.398609	-0.0860586	-0.040906	-0.115633	0.0786591	-0.0615025	-0.0806193	0.00393772	0.225784	0.134293	0.100425	0.454779	0.0306826	0.0435724	-0.069242	-0.0351415	-0.0473785	-0.115059	0.0731359	-0.0197377	0.332622	0.21465	0.0315189	0.0634389	0.102265	0.0304074	0.163075	-0.0190887	-0.0190048	0	0.0299673	0.134004
CAPS	0.191545	0.261018	0.0637865	0.0431232	-0.176385	-0.402753	-0.256412	-0.409609	-0.346092	-0.709709	-0.297716	-0.165923	-0.397176	0.0310917	-0.225941	-0.393526	-0.0652266	-0.412315	-0.377784	0.0827274	0.154093	0.398159	0.292584	0.00358295	0.103638	0.126104	0.163358	0.252914	0.243072	0.0792189	0.381049	0.159546	0.108385	0.100623	0.327735	0.00679207	-0.306503	-0.297967	-0.314827	-0.328619	-0.31253	-0.18411	-0.372357	0.0953875	-0.0592537	0.130875	-0.173546	0.218809	0.31775
CAPZA1	-0.201907	-0.107212	-0.151442	-0.262054	0.368861	0.0246458	0.333178	0.373076	0.0817685	0.578372	0.471161	0.170209	0	-0.183142	-0.315802	-0.000963	-0.265663	0.0230565	0.372809	-0.139622	-0.141833	-0.173341	-0.627423	-0.0528731	-0.397585	-0.27223	-0.365562	-0.371723	-0.356299	-0.406335	-0.708481	-0.0880661	-0.0672173	-0.129354	-0.615583	-0.12469	0.396038	0.312575	0.190076	0.455841	0.257829	0.343458	0.0104885	-0.160968	-0.06882	0.000745	-0.131608	-0.276232	-0.533266
CAPZA2	0.12829	-0.251394	0.0145435	-0.0487118	0.44336	-0.197981	0.232625	0.454561	0.223564	0.550972	0.391701	0.407368	0.123882	-0.21403	-0.313945	-0.284814	-0.0113297	-0.0696249	0.492106	-0.230429	0.0422459	-0.0479183	-0.835968	-0.0736294	-0.335355	-0.483851	-0.352321	-0.361291	-0.80573	-0.548617	-1.01184	-0.0685854	0.069931	-0.137818	-0.0981598	0.119493	0.394207	0.214667	-0.0608263	0.286287	0.170805	0.0941515	0.256817	-0.112375	-0.274186	-0.229282	-0.0796432	-0.48123	-0.776348
CAST	-0.207812	-0.0173969	0.12655	-0.18189	0.217085	0.151655	0.280974	0.175802	0	0.434826	0.388964	0.328422	-0.00786686	0.155148	-0.158033	-0.0691557	0.161199	0.349257	0.155102	-0.271681	-0.0408945	-0.350137	-0.705379	-0.0338612	-0.0974226	-0.124603	-0.252384	-0.19996	-0.371828	-0.536544	-0.581422	-0.160167	-0.130406	-0.152486	-0.199937	-0.219945	0.365049	0.0848303	0.0662699	0.153884	0.0668287	0.14713	0.376061	-0.148848	-0.0665875	-0.0696335	-0.0203629	-0.284439	-0.168723
CAPZB	-0.0123072	-0.243758	-0.193814	-0.0221729	0.195249	-0.234621	0.143008	0.20857	-0.123051	0.279534	0.224148	0.000276	0.325592	0.100792	0.20304	0.29415	0.368939	0.279517	0.209289	-0.28998	0.104696	-0.451444	-0.533344	0.00423431	-0.223017	-0.0226412	-0.225975	-0.0435343	-0.385644	-0.270734	-0.645251	-0.194849	-0.247038	-0.146855	-0.0729685	0.0363846	0.182378	0.126498	-0.0248709	0.231244	0.103107	0.0764141	0.199695	-0.180388	0.00462627	-0.126569	-0.137368	-0.233731	-0.169525
CARS	0.276946	-0.233021	-0.213356	0.151212	0.23549	-0.448921	-0.285259	-0.286313	-0.467435	-0.273058	-0.0100121	0.304553	0.0958028	-0.169823	-0.169615	0.24957	0.111436	0.172449	0.10881	0.21491	-0.208882	-0.409024	-0.0392909	-0.0124035	0.410173	0.289374	-0.0262804	0	-0.418769	0.155242	-0.167934	-0.132001	-0.33737	0.0235348	0.313222	0.346045	-0.128555	0.162744	-0.243831	-0.104767	-0.223033	-0.259504	-0.0569859	-0.402058	-0.116208	-0.440683	0.11419	0.153074	0.133292
CASP1	0.108539	-0.387289	-0.298595	-0.109721	0.600106	-0.265081	0.308978	0.672474	0.346556	1.08681	0.624146	0.416698	-0.209947	-0.134165	-0.499813	-0.367639	0.0210905	-0.183469	0.698093	0.0788913	0.17902	0.107436	-0.223896	-0.177758	-0.522762	-0.216773	-0.558595	0.163766	-0.262686	-0.395334	-0.438526	-0.144184	0.00341845	0.146622	-0.392971	0.0210118	0.34613	0.206131	0.0333891	0.377766	0.597398	0.68914	0.648561	-0.259076	0.174232	0.171129	0.15663	-0.385155	-0.500903
CASP2	-0.0560765	-0.236397	-0.327667	-0.192522	0.0497484	-0.297241	-0.0990577	-0.0300736	-0.0802393	0.1546	-0.134805	0.0518899	0.262811	0.131814	0.0795469	0.0951862	0.14097	0.076509	0.0653563	0.196605	0.185806	-0.0119996	0.0120292	-0.225614	-0.027751	0.112007	-0.099062	0.0708933	0.0226545	-0.0324225	-0.196725	-0.390586	0.0229902	0.00571346	-0.0959563	-0.174474	0.00532961	0.204676	-0.122185	0.0349627	0.0973678	0.0244336	-0.00897407	-0.079217	0.00474834	-0.0858426	-0.141627	0.105438	0.107846
CASP3	-0.0170422	-0.410119	-0.274272	0.0160294	0.293684	-0.484972	-0.0321951	-0.0240126	-0.144723	0.470906	0.147571	0.0372801	-0.0203905	-0.149509	0.229086	-0.160127	0.21978	-0.199205	0.436375	0.0689135	0.0606298	-0.120564	-0.655521	-0.022439	0.153792	-0.0747409	-0.173621	-0.237113	-0.608166	-0.0492358	-0.542691	-0.52714	-0.0790968	-0.27946	-0.364375	-0.0424709	0.278462	0.172092	0.0182176	0.0471225	0.280217	0.0540204	0.307417	-0.189581	0.118699	0.0361667	0.132095	0.100904	-0.480753
CASP4	0.0335784	-0.141813	0.191423	0.0206494	0.579124	-0.217121	0.24535	0.346438	-0.223309	0.891445	0.451589	0.313653	-0.12418	-0.471537	-0.453503	-0.386905	-0.288882	-0.262355	0.513175	-0.177437	-0.126831	-0.303749	-0.801417	-0.103125	-0.336512	-0.425315	-0.349782	-0.29056	-0.444683	-0.164834	-0.614268	-0.0484748	-0.0335717	0.0477972	-0.956039	-0.0217123	0.547206	0.161835	0.164783	0.253058	0.423235	0.532983	0.530319	-0.159214	0.253948	0.0556259	0.184208	-0.498616	-0.538353
CASP5	-0.0358572	-0.118654	-0.016922	0.0302978	-0.00489569	-0.0149817	0.117266	0.049603	-0.0548167	0.0650625	-0.0413418	0.0159712	-0.0359039	0.170713	0.063664	-0.205023	-0.057519	0.0332489	0.0475392	0.0331845	-0.0097661	-0.0630136	-0.069046	0.0135794	-0.0717831	-0.0171471	-0.109457	0.0321031	-0.0569491	0.0228224	-0.0444913	0.0312567	0.00426197	-0.0109854	-0.153806	0.129112	-0.0597758	0.0103521	0.00388622	0.0561395	-0.00277185	0.167129	-0.0289345	-0.0762792	0.022984	-0.0243187	-0.0348177	-0.0452189	-0.102156
CASP6	0.138579	-0.138468	0.0717907	0.106654	0.321931	-0.354227	0.262686	0.465086	0.00733566	0.339613	0.210257	0.258883	-0.177189	-0.320143	-0.325418	-0.195218	-0.161761	-0.0513558	0.393739	-0.244921	-0.203821	-0.193582	-0.492311	-0.100251	-0.106988	-0.156044	-0.18906	-0.135602	-0.122855	-0.069705	-0.434873	-0.399149	-0.226328	-0.0324154	-0.239203	0.147872	0.553027	0.370994	0.250467	0.142741	0.169561	-0.0019083	0.39182	-0.0751495	0.143231	-0.117398	-0.102213	-0.217861	-0.224421
CASP7	0.479044	-0.372815	-0.190965	0.37164	0.197012	-0.476239	0.507393	-0.0108891	-0.132617	0.0521703	0.0919352	0.110619	-0.190755	-0.0420103	-0.33892	-0.182311	-0.284989	-0.0505476	0.467164	-0.0814404	0.0751658	-0.212002	-0.796774	0.0614824	-0.112286	-0.445527	-0.0561128	-0.210579	-0.228597	-0.0898743	-0.0871806	-0.286967	-0.109794	-0.129508	-0.474462	0.365495	0	0.17333	-0.328953	0.266699	-0.0702996	-0.00676489	0.267403	-0.166989	0.0641761	-0.409128	0.00932932	-0.414299	-0.124932
CASP8	0.182165	-0.163373	-0.143197	-0.00972366	0.121627	-0.390028	0.209509	0.17819	-0.220419	0.314181	0.118577	0.128017	0.0605006	-0.0911398	-0.277993	-0.156147	-0.179826	-0.225476	0.16901	-0.194046	0.063417	-0.0105534	-0.0868139	-0.230295	0.0605469	0.0604906	-0.231648	-0.0877118	-0.186575	-0.117892	-0.414888	-0.150197	-0.0394988	-0.0579872	-0.253253	0.136199	0.0293818	0.0604253	-0.0762372	0.312327	0.00407267	0.115239	0.101634	-0.11497	-0.0670691	-0.131111	0.098588	-0.101463	-0.270386
CASP9	-0.0439687	-0.160283	-0.257511	0.161633	-0.242542	-0.16563	-0.29711	-0.382215	-0.24111	-0.357868	-0.194211	-0.399321	0.147139	0.306474	0.121105	0.0393343	0.0622277	0.0692072	-0.0705442	-0.000473	0.0801473	-0.0410852	-0.284799	0.434076	-0.0210261	0.2328	0.00297022	0.171126	0.191524	0.0656366	0.052423	0.037487	-0.142839	0.05761	0.0212464	0.141231	-0.102241	-0.0201712	-0.155114	-0.0741582	-0.130018	-0.222297	-0.196527	0.259459	0.159857	0.182592	0.143457	0.197333	0.161965
CASP10	0	-0.0919929	-0.28515	-0.10202	0.210481	-0.0254049	0.314406	0.191079	0.110044	0.361319	0.341684	0.192892	0.10287	-0.269785	-0.199066	-0.124428	0.116625	-0.068316	0.467433	-0.108622	0.0497599	0.124434	-0.628281	-0.0542932	-0.180711	0.071012	-0.199718	-0.342816	-0.119229	-0.250984	-0.445904	-0.149721	-0.0942192	-0.329709	0.137541	-0.156838	0.209229	0.0967779	0.0537109	0.299213	0.0516887	-0.0018239	0.0878468	-0.220546	-0.0501661	-0.0559459	-0.0777054	-0.184457	-0.163721
CASQ1	0.112165	0.186061	-0.0822682	0.049264	-0.207006	-0.158148	-0.315169	-0.170493	0.0706949	-0.164882	-0.209558	-0.112971	-0.150337	-0.0810804	-0.10899	-0.19452	0.16416	0.103992	-0.0701542	0.236683	0	0.472208	0.202264	0.0136228	0.130523	0.0423064	0.177385	0.194448	0.2121	-0.00465679	0.487325	0.2605	0.341522	0.197031	0.0214901	0.204006	-0.0527573	-0.0883837	0.0519362	-0.0667696	-0.161311	-0.151104	-0.021008	0.0862026	-0.0273891	0.124977	-0.08143	-0.0160155	0.0902758
CASQ2	-0.104311	0.222414	0.16099	-0.0591631	-0.0668249	0.230368	0.441657	0.0329208	0.0658131	0.0936537	0.0350738	-0.0808492	0.105088	0.294089	0.286322	0.424748	-0.070004	-0.0358148	-0.151646	0.486421	-0.183313	-0.145149	-0.154809	-0.0212841	0.28058	-0.0162892	-0.190304	0.434484	0.227719	0.0141416	0.0608053	-0.0715036	0.0167661	0.102079	-0.14532	-0.172681	-0.0350289	0.00598145	0.299359	-0.203106	0.172295	0.265781	0.280316	-0.0245757	0.00894308	0.0730224	-0.0355234	-0.0948334	0.174547
CASR	-0.226764	0.120712	-0.195417	0.0168896	0.162116	0.359077	0.1162	0.0689583	0.00330019	-0.119736	0.0752444	-0.135578	-0.00405216	0.283018	0.121025	-0.108329	-0.0111198	0.348053	-0.0592623	-0.0199199	-0.0303345	0.0146751	0.409423	0.0369253	0.0922799	-0.26199	0.253637	0.0426674	-0.00307179	0.110625	-0.0682335	0.0571084	-0.00471783	0.0321188	0.123613	-0.104646	-0.00169659	0.110261	-0.00150585	-0.191895	0.127024	-0.188819	0.3097	0.220931	-0.0651989	-0.222266	-0.0396032	-0.0468168	0.0724349
CAT	0.324102	-0.112687	-0.355055	0.0250654	0.229534	0.191676	0.486066	0.160765	0.162273	0.301958	0.224198	0.285918	-0.288043	-0.43419	-0.0968895	-0.138589	-0.116248	-0.17056	0.159137	-0.305587	-0.0138855	-0.604584	-0.973936	0.150663	-0.0613308	0.371212	-0.215925	-0.152796	-0.479754	-0.467763	-0.604266	-0.148296	-0.215812	-0.116428	0.0849648	0.075469	0.436634	0.324182	0.345608	0.143395	0.326536	0.249194	0.283758	0.00651646	-0.447734	0.0169716	-0.0692205	-0.548485	-0.0742016
CAV1	-0.0223403	-0.127285	0.315835	0.140189	0.00309849	-0.350873	0.286618	0.0976186	0.406346	0.18402	0.0685654	0.0178008	-0.191972	-0.405945	-0.69673	-0.328523	-0.291476	-0.352712	-0.0134678	0.330228	-0.0185828	-0.0608654	-0.333508	-0.0762768	0.0319881	-0.153278	-0.0413694	0.224495	0.375664	-0.125525	-0.168895	0.144345	0.0292387	0.159392	0.0434284	0.0978804	-0.525363	0.183916	-0.271481	0.153794	-0.0420671	0.163933	0.379617	0.078186	0.0680585	0.440122	-0.50484	-0.213464	0.631919
CAV2	0.064261	0.278406	-0.460249	-0.140438	0.354692	-0.651411	0.309782	-0.00792837	-0.0290804	0.241567	0.308115	0.298445	0.227895	0.0666823	-0.184479	0.281555	0.07968	0.00114584	-0.0389433	0.124889	-0.224852	-0.649661	-0.508544	-0.0115175	0.200061	-0.509297	-0.150836	-0.353456	-0.470828	-0.145628	-0.740006	-0.430728	-0.532506	-0.0963478	0.269232	0.174065	-0.203585	0.273903	-0.00335789	-3.19e-05	0.218632	-0.190509	0.299684	-0.207158	0.0578995	0.0580025	-0.231987	-0.659782	-0.558097
CAV3	0.317768	0.370928	0.229652	-0.0252333	-0.22839	0.206565	-0.0418453	-0.0789766	0.171726	-0.151742	-0.0261931	0.0218143	0.27447	-0.134799	0.166886	-0.0706606	-0.0715823	0.0425696	-0.0765224	-0.0568824	0.0345321	0.0828347	-0.0738964	-0.266673	0.0141945	-0.0379143	-0.0270996	-0.0525031	0.103536	-0.141983	0.511856	-0.0867724	0.09794	0.17298	0.101418	0.131719	-0.231614	-0.044023	-0.0704541	0.132234	0.126131	0.15923	-0.00429297	0.155875	0.0696788	0.250532	0.0147777	-0.0492539	0.0330024
RUNX2	-0.0863347	0.19098	-0.0519743	-0.0571909	-0.0715275	0.177022	0.00450468	0.224702	0.241393	0.166496	-0.158571	-0.0500331	-0.235682	0.608986	-0.194473	-0.28225	0.292117	-0.192693	-0.0863409	0.0828695	0.0295367	-0.184597	0.000458	-0.203522	-0.0159082	0.244897	-0.223958	-0.0278893	0.282206	0.13537	0.236052	0.0477324	0.178791	-0.0292397	-0.0946221	-0.159519	-0.0334301	-0.17352	0.149619	0.16763	0.176376	-0.0658493	0.183078	-0.127545	-0.0146809	-0.242849	-0.0330486	0.0497756	0.0776591
RUNX1	-0.287354	-0.27708	-0.353625	-0.0563064	-0.122482	0.204009	-0.0170879	0.0342336	0.0613008	0.162982	-0.045012	0.0524707	-0.0575819	0.173182	0.103402	0.106351	0.107034	0.0428443	0.00858593	0.216838	0.107321	0.12793	-0.011941	-0.141567	0.000431	-0.034183	-0.0958529	0.122304	0.00365686	0.300151	0.299966	0.0363545	0.0427103	-0.0913205	-0.15754	-0.231968	-0.0439444	-0.0950408	-0.100358	-0.0147986	0.221469	0.0888853	-0.0259981	-0.0441418	0.049582	-0.0515261	0.160353	0.124258	0.290439
RUNX1T1	-0.0695825	0.00776196	-0.344004	-0.174127	-0.095089	-0.0805507	-0.140514	-0.265469	0.0857477	0.0966487	0.115763	-0.18193	0.442709	0.0930853	0.000633	-0.0522308	0.184598	-0.203868	-0.207047	0.355345	0.0880184	-0.0419812	0.536452	-0.00354767	0.286198	0.0196252	0.130937	-0.10272	0.232592	0.0390949	0.236567	0.0172491	-0.108249	-0.0224953	-0.238981	0.0559635	-0.331452	0.0512562	-0.121093	-0.0783987	0.118754	0.239277	0.188686	0.114376	0.11336	0.067821	0.0433221	-0.0323095	0.0241427
CBFA2T3	0	0.303088	0.0877605	-0.110241	-0.225244	0.185288	-0.12279	-0.223416	0.191011	-0.430447	-0.18487	-0.228461	-0.0335727	0.175635	0.0472579	0.25333	0.137972	0.130741	-0.18122	0.049386	-0.224624	-0.0450349	0.406097	-0.117499	0.0993404	0.067349	-0.0473781	0.13675	0.175046	-0.0711169	0.290234	-0.109215	0.0564628	0.248747	0.0435224	0.0442719	-0.0241203	0.00486422	0.00160074	0.14914	-0.11693	-0.0127659	-0.0852265	0.105202	-0.182651	-0.269384	-0.126588	-0.113731	0.0449886
RUNX3	-0.0276432	0.374912	0.212978	-0.157686	-0.101122	0.421853	-0.103052	0.106904	-0.0221691	0.033474	-0.284358	-0.130202	-0.00908279	0.0398326	0.208865	0.25869	0.173937	0.0520978	-0.183808	-0.00316143	-0.078826	-0.0903416	0.111145	0.0192409	-0.115119	-0.119535	0.162686	0.0211058	0.00819111	0.101194	-0.039608	0.0575013	0.145669	0.202155	-0.102329	0.0983887	-0.0228214	0.0840716	0	0	-0.13386	-0.0456381	0.00602293	-0.153176	-0.183027	-0.0387826	-0.0973501	0.0165257	-0.0437002
CBFB	-0.258951	-0.210456	0.0374579	-0.032156	0.237258	-0.379592	0.160119	0.196571	0.0438256	0.260431	0.121408	0.227149	0.104292	0.135888	-0.217826	0.0363488	-0.248635	-0.211914	0.258626	-0.0305905	0.00981903	-0.0947871	-0.666055	-0.0279036	-0.157424	-0.312514	-0.351121	-0.168661	-0.496657	-0.225364	-0.340508	-0.244951	-0.195888	-0.395199	-0.359228	-0.119827	0.0598035	0.174005	-0.168467	0.0985174	-0.0554504	0.207988	0	0.0496397	0.373898	-0.208492	-0.316645	-0.0260243	-0.474361
SERPINA6	-0.0326147	-0.00174808	-0.0873127	0.195712	0.211397	-0.0872784	-0.0367403	0.19861	0.259954	0.443203	-0.103535	-0.407473	0.212854	0.0197744	0.0607471	0.232001	0.357631	0.315191	-0.0112772	-0.187106	-0.0146646	-0.448234	-0.758267	-0.308177	-0.0455351	-0.399786	-0.272326	-0.118059	-0.157182	-0.467282	-0.655004	0.102436	-0.514276	-0.0209026	-0.047452	-0.0450277	0.332052	0.104615	0.207483	0.10162	0.114058	-0.0407982	0.265513	-0.139947	-0.363804	-0.0504494	-0.265284	-0.545283	-0.280695
CBL	-0.132466	0.0804687	0.118943	-0.0355763	-0.119895	-0.131917	0.0993538	-0.19285	-0.188616	0.300475	-0.161369	-0.112389	0.458209	0.517165	0.422856	0.249496	0.298707	0.015379	-0.136057	0.130824	0.176183	-0.000441	0.16596	-0.0994811	0.305965	0.110923	0.00141239	0.220674	-0.0996232	-0.0388184	-0.0630727	-0.00186777	-0.31331	-0.0200539	0.00701952	-0.109615	-0.331895	-0.058208	0.0245628	-0.192129	-0.112712	-0.0923562	-0.203318	-0.00694275	0.17169	0.287859	0.122548	0.254002	0.168874
CBLB	-0.104409	0.0157094	0.01369	-0.174767	0.118926	-0.0441732	0.151878	0.0382414	-0.220417	0.363644	0.165046	0.312195	0.368894	0.142856	-0.0656056	-0.0303874	-0.025218	0.108635	0.113902	0.107341	0.17121	-0.00778866	0	-0.318476	0.0199199	-0.254501	-0.288349	-0.133929	-0.0649738	-0.342923	-0.502472	-0.0797505	-0.17239	-0.474322	0.0150318	0.0395641	0.101103	0.0252538	0.156045	-0.00421286	0.111745	-0.0253968	0.117192	0.203508	0.19069	0.37265	-0.175181	0.238461	0.03895
CBLN1	0.238977	-0.337982	0.206637	0.29655	-0.203221	-0.0718064	-0.197516	-0.268117	-0.117609	-0.336781	-0.225889	-0.13617	-0.0693345	-0.00072	0.0296841	0.185163	-0.126015	-0.170321	0.0346847	0.6543	-0.148154	0.180529	0.488047	-0.162839	0.349314	0.148662	0.214104	0.245293	0.393569	0.349873	0.614641	-0.0361238	0.356144	0.18072	0.0694327	0.245713	-0.133581	-0.405029	-0.0526214	-0.172381	-0.260229	0.0156498	-0.0779123	0.0849309	-0.052917	0.0102234	0.19305	0.273406	0.32869
SERPINH1	-0.21927	-0.102814	-0.0661373	0.162396	-0.208556	-0.0428429	-0.132389	-0.0475469	-0.0166202	-0.0985784	-0.176966	-0.0894599	0.0670924	-0.473141	-0.0830264	0.000713	-0.193379	-0.143289	0.0989385	0.0817194	0.088038	-0.240176	0.0157876	-0.165024	-0.00870419	0.24794	0.211699	0.147596	-0.0478902	-0.0492358	-0.111635	0.213655	0.230097	-0.245887	-0.227947	0.154407	-0.0337691	0.00658989	-0.466569	-0.20048	-0.00326777	-0.149114	0.0221705	0.146853	0.132981	0.0415816	-0.273286	-0.0603619	0.319984
CBR1	0.325459	0.478818	-0.311915	0.066185	0.13107	0.265428	-0.188089	0.0627327	-0.352795	-0.344359	0.147748	-0.294927	0.122407	0	-0.508366	-0.275452	0.0731974	-0.0200748	0.0163174	-0.2338	0.488136	-0.185195	-0.373254	0.370452	-0.0489206	0.141973	0.280662	0.065115	-0.205402	0.183503	-0.670816	0.177706	-0.384182	0.211277	-0.231903	0.447844	-0.218719	0.13871	-0.273828	-0.137819	-0.00248814	-0.407667	-0.46628	0.0627069	0.0514326	0.283312	0.0402527	0.0289297	0.172037
CBR3	0.0740652	0.274981	0.0847669	0.205809	-0.239378	0.262291	-0.254577	-0.0146055	-0.221849	-0.247478	-0.194726	-0.0924258	0.120636	-0.217741	-0.149856	0.00977135	0.138779	-0.167475	-0.140081	-0.0753455	-0.0471487	0.107915	-0.0747013	-0.0113797	0.0758929	-0.041821	-0.0503368	-0.107332	0.179485	0.0978475	0.270912	0.171472	0.201184	0.284463	0.16434	0.163182	-0.173107	-0.161178	-0.088459	-0.155299	-0.165666	-0.120506	-0.0690007	0.0531416	-0.0317879	0.106241	-0.0323234	0.00140619	0.110352
CCIN	-0.0467558	0.02806	-0.163567	0.166403	-0.143935	0	0.00691366	-0.0480094	0.136213	-0.0750151	-0.150471	0.0130076	-0.0496249	0.0181699	-0.00686598	0.028542	0.127353	0.045198	0.0644646	-0.0539069	0.00694847	-0.166257	0.146397	-0.142527	-0.126266	-0.0397344	-0.0129137	0.029429	0.0923824	-0.0146685	0.071846	0.0480161	-0.0237102	0.0402994	0.0114141	-0.0626874	0.202878	-0.0886626	0.218268	0.0274587	-0.0448446	-0.00747967	0.199733	-0.0604382	-0.110143	-0.0832582	-0.0364919	0.267845	0.0213428
KYAT1	-0.164942	-0.0584164	-0.0670195	0.00350428	-0.0987787	-0.109953	0.132519	-0.152015	0.15856	-0.0685701	0.104893	-0.10259	0.0684333	-0.0117369	0.00872612	-0.0637598	-0.00110578	0.0377517	-0.198664	-0.0451646	0.0167818	0.0129404	-0.0603442	0.405245	-0.0740008	0.0509753	-0.0338182	0.14366	0.120005	0.181787	0.071528	-0.108013	-0.107683	-0.0636702	0.44435	0.0103669	0.00929165	0.147245	-0.111691	-0.440899	-0.107111	0.0254292	-0.0713887	0.00551224	0.233111	-0.0706029	0.0670953	0.137722	0.0194631
CCK	0.0544105	0.331873	-0.058464	-0.0151877	-0.19944	0.382618	-0.100801	-0.108234	0.163321	-0.0396585	0.012239	-0.072608	-0.0663071	0.0813203	0.0229511	0.0518937	0.0866179	0.0370393	-0.145006	0.0409384	-0.246639	0.158349	0.48263	-0.052206	-0.0927319	0.0782981	0.124204	0.274265	0.425735	-0.021934	0.327349	-0.0148225	0.0396013	0.167684	0.151731	0.0610647	-0.0859594	-0.111493	0.0721478	-0.0389528	-0.055325	0.169296	-0.0232468	-0.0437298	-0.0614886	-0.372686	0.0502667	0.0167899	0.0725102
CCKAR	-0.100673	0.308743	-0.0900516	-0.101694	-0.0931392	0.290247	0.342658	-0.0141306	0.0726595	-0.171694	0.0863204	0.281946	0.339027	-0.153883	0.212209	-0.00815439	0.438989	0.156713	0.210982	-0.125964	-0.236971	0.0112085	0.164508	-0.00954962	0.184659	-0.113605	0.160338	-0.087028	0.250202	-0.172038	0.227408	-0.187355	0.13587	0.270079	-0.0865579	-0.0659547	0.167474	0.0912127	0.146904	0.0449414	-0.00120258	-0.0959549	0.0386138	-0.168188	-0.200976	-0.0207019	-0.241257	0.202743	-0.200219
CCKBR	0.0386887	0.195808	0.0633826	0.0465579	-0.0681663	0.420508	-0.127151	-0.0416856	0.0372949	-0.215275	-0.0267644	-0.221312	-0.0685334	0.149122	0.298687	-0.0217586	-0.20874	-0.292325	-0.123666	0.178985	-0.115831	0.0567222	0.18555	-0.0709724	0.128043	-0.0988183	0.115166	0.177841	0.278779	0.382759	0.249733	0.00843573	0.144833	0.0694518	0.147608	0.182486	0.0188813	0.101983	0.0540748	-0.245214	-0.0478744	0.0671792	-0.0367532	0	-0.014987	0.0874352	-0.0553794	0.0590315	0.141762
KRIT1	-0.123235	-0.226491	-0.287644	-0.100628	0.389752	-0.100525	0.322481	0.192504	0.106262	0.565478	0.604433	0.419396	0.217503	0	0.00277281	-0.319002	0.0660806	-0.0283685	0.150221	-0.218087	0.126695	-0.193954	-0.225632	-0.152697	0.062511	-0.339298	-0.29383	-0.476539	-0.232689	-0.116837	-0.307025	-0.3262	-0.129917	-0.270351	-0.0554304	-0.308294	0.225784	0.334122	0.260882	0.299073	0.202959	0.289715	0.256441	0.0156722	0.119364	-0.135968	0.0680289	0.204597	-0.318131
CCNA2	0.0325947	0.203465	0.0490131	-0.0934644	-0.088871	0.0745811	0.00785541	-0.0487804	-0.167771	0.0143452	0.142113	0.0649638	0.181048	-0.0341806	-0.140941	0.0348954	0.199647	-0.0791283	-0.00332403	-0.0583291	-0.0953517	0.0728955	-0.00332403	0.130523	-0.0676122	0.0650654	0.0609932	-0.0565949	-0.247264	-0.122712	0.00854778	0.145393	-0.0962801	0.0598254	-0.268961	-0.13959	-0.212665	-0.11845	0.0479894	0.0204148	-0.081243	-0.00845957	0.308979	-0.272185	-0.134978	-0.205728	-0.110152	0.218481	-0.154807
CCNB1	0.105928	-0.123662	0.000607	-0.0426073	0.00796461	-0.259378	0.0752978	0.0887284	-0.105706	0.00919771	-0.000852	0.0739598	0.336468	0.0314684	0.111347	-0.137801	0.131149	0.0799694	0.101755	0.0132389	-0.114084	-0.103175	0.0717082	0.0945854	-0.200438	-0.048151	-0.271676	-0.0134206	-0.128576	0.000432	-0.139031	-0.122094	0.000725	-0.0318542	-0.108011	0.262783	0.0606594	-0.177301	-0.158504	0.0302238	0.176684	0	0.316045	-0.11379	-0.0512733	0.0287986	0.0318785	-0.178666	-0.000557
CCNC	0.0440235	-0.405039	0.104673	0.0707502	0.386483	-0.41038	-0.0275497	0.278566	-0.0467682	0.371375	0.359137	0.210956	-0.207605	-0.529107	-0.465751	-0.356365	-0.197103	-0.332481	0.479282	-0.281911	-0.00440216	-0.444902	-1.218	0.0195045	0	-0.559836	-0.412687	-0.479368	-0.75656	-0.449797	-1.24491	-0.424479	-0.293157	-0.198919	-0.249017	0.200084	0.348385	0.0149088	0.0560493	0.223768	0.042881	-0.196383	0.277249	-0.226732	-0.0905199	0.0267973	-0.0518494	-0.509725	-1.05427
CCND2	-0.158452	0.00575304	-0.00490904	-0.312252	-0.405511	-0.392092	-0.55109	0.0690956	-0.0969653	0.291876	-0.0984826	0.12605	0.458176	0.399701	-0.00873184	0.092587	0.257169	-0.102599	0.122728	0.288029	0.391163	0.232674	0.240643	-0.113604	0.259427	0.258901	0.21224	0.25152	0.25126	0.124604	-0.0905275	0.201613	0.0814714	0	0.0235972	-0.0266142	-0.337349	-0.00312376	-0.332463	-0.189901	0.0851045	0.0496306	-0.0757122	-0.028492	0.160492	0.405341	0.125222	0.412416	0.675912
CCND3	-0.0521679	0.0648499	-0.123553	0	-0.239723	0.276665	-0.080596	-0.261227	-0.180299	-0.179136	-0.185561	-0.338392	-0.0312819	0.0632963	0.227841	0.00656271	0.0692229	0	-0.0744748	-0.0619621	0.0287452	-0.15708	0.158986	0.0555344	0.114295	0.1763	-0.0740347	0.213543	0.00664616	0.00365877	0.357753	0.0835509	-0.064508	0.0307064	-0.207415	0.122569	0.0234523	-0.125498	-0.174929	-0.104756	-0.0026803	0.0920024	-0.28009	0.000711	0.199299	-0.0940876	0.0827236	-0.144175	0.102751
CCNE1	-0.105483	-0.00301838	0.00965118	0.0771875	-0.160475	-0.00604296	0.0089879	0.0467501	0.0614729	-0.0868273	0.0925231	-0.149765	-0.150253	0.238948	0.0621891	0.265409	-0.188985	-0.138716	-0.174796	0.0701857	0.0381451	-0.0222836	0.164584	0.0199308	0.430865	-0.229952	0.290983	0.149245	-0.184282	-0.130276	0.297133	0.358299	-0.163224	-0.054708	0.159004	0.195929	-0.00611639	-0.14055	-0.0827627	-0.123838	0.176545	0.142484	0.0489888	-0.0950146	-0.0221558	-0.0548234	0.380246	-0.0149555	0.27329
CCNF	0.279998	0.32181	0.048254	0.106913	0.0814762	0.143272	-0.0820899	-0.0147815	0.0421028	-0.434732	-0.0377612	-0.0100198	-0.0745702	-0.117768	0.0513053	-0.119998	0.0424047	0.028091	-0.0059185	-0.206156	-0.117476	-0.124351	0.0133548	-0.0637641	0.163331	0.167734	0.177121	-0.0298657	0.00121546	-0.0380564	0.00527859	0.0616627	-0.0377798	0.0458732	0.0561452	0.0227466	0.0255523	0.0475502	-0.0218792	0.0296063	-0.0336328	0.0108824	-0.0809779	-0.0895777	-0.0284705	-0.0518508	-0.153663	0.000396	0.158068
CCNG1	0.16617	0.0547571	0.279787	0.0793371	0.297869	0.0576	0.254847	0.0537901	-0.00176621	0.107883	0.0776844	0.13096	0.34888	-0.0573816	-0.277181	-0.263285	-0.115001	0.228593	-0.00624371	-0.473237	0.0456762	-0.161221	-0.902392	-0.262503	-0.274552	-0.271999	-0.134545	-0.505208	-0.163417	-0.625731	-1.26831	-0.142716	-0.236436	-0.0694122	0.291621	0.0418482	0.258297	-0.0524569	-0.237437	0.0399857	-0.224848	-0.0966091	-0.213681	0	-0.226851	0.317779	-0.113351	-0.261525	-0.363241
CCNG2	-0.040925	0.175838	-0.268906	-0.188719	0.163473	-0.128582	-0.0836635	-0.0904322	0.0431323	0.535181	0.195454	0.257073	-0.0464873	0.0349812	0.0421748	0.00777197	0.0170369	-0.271462	0.0346518	-0.0687985	-0.0712333	0.218553	-0.309976	0.285314	-0.0477686	-0.297804	-0.453355	-0.189196	-0.137938	0.0891328	-0.483868	-0.0620089	-0.248386	0.273643	0.226799	-0.027772	0.15133	0.0724349	0.195368	0.00514412	0.468125	0.299675	0.364079	-0.136097	0.245294	0.138768	-0.100359	0.0262308	-0.162532
CCNH	-0.0867004	-0.1941	0.104524	-0.042098	0.425288	-0.181307	0.583913	0.32847	0.0994534	0.458561	0.449076	0.387681	0.014173	0.00627136	-0.226647	-0.256729	-0.0190039	-0.0322404	0.286735	0.0206408	0.172222	-0.065381	-0.249788	-0.16085	-0.15814	-0.419861	-0.182884	-0.284326	-0.4637	-0.255403	-0.366414	-0.0651269	0.00133038	-0.308615	-0.258463	-0.0348959	0.287168	0.234547	0.253557	0.315998	0.00913715	0.0905666	0.210499	0.0480394	-0.142576	0.0130281	0.0795484	-0.129643	-0.466514
CCNT1	-0.464378	-0.544107	-0.256631	-0.0870638	0.484706	0.0428724	0.556215	0.450306	0.0636005	0.380111	0.493594	0.0747004	0.127389	0.00650024	-0.515535	-0.165666	-0.0832973	0.0740862	0.172068	-0.155753	-0.0918193	-0.138568	-0.351172	0.0417972	-0.120749	-0.0737662	-0.190652	-0.055161	-0.287222	-0.165668	-0.474012	-0.0472369	-0.237414	-0.261705	-0.178393	-0.455308	0.42253	0.367131	0.107159	0.335776	0.457488	0.20339	0.182219	-0.021224	-0.130979	-0.0412641	0.114882	-0.168902	-0.563486
CCNT2	-0.217314	-0.646254	-0.1558	-0.138947	0.420121	-0.108144	0.363942	0.200928	-0.113095	0.746987	0.66279	0.368093	-0.0198736	-0.171324	-0.187245	-0.222527	-0.275405	-0.217961	0.361706	-0.244649	-0.00406647	0.0714531	-0.505271	-0.00806618	0.115931	-0.389372	-0.394993	-0.366747	-0.355877	-0.126832	-0.605437	-0.389158	-0.0638752	-0.398399	-0.222661	-0.402035	0.432186	0.294699	0.285372	0.179001	0.258358	0.157979	0.219926	0.0284777	0.0453353	0.0748625	-0.0539989	0.0614619	-0.483606
CCT6A	-0.0929871	-0.472002	-0.0311794	0.125029	0.443403	-0.21649	0.148575	0.346916	0.0125055	0.70895	0.331791	0.423259	0.0624971	-0.444068	-0.216168	-0.375906	-0.307732	-0.156788	0.616936	-0.145146	0.0302563	-0.31548	-0.685545	-0.0368166	-0.138253	-0.302388	-0.304056	-0.150332	-0.672632	-0.467624	-0.906453	-0.241698	-0.197646	-0.216967	-0.210368	0.0280714	0.444904	0.123615	0.191223	0.2004	0.385467	0.202135	0.566581	0	0.287679	-0.0650587	-0.254988	-0.306961	-0.454743
CD1A	-0.0244641	0.168865	0.0596261	-0.0898962	-0.203784	0.142757	-0.00610352	-0.1514	0.198736	-0.210386	0.150761	-0.17095	0.0460897	0.155792	0.173508	-0.10545	-0.0327291	0.139302	-0.23507	0.16375	-0.140384	0.0600123	0.0427151	-0.10565	-0.16129	-0.162572	0.0925994	-0.186734	0.047152	0.265152	0.0896812	-0.107043	0.0487976	0.375376	-0.0903587	0.304719	0.0125408	0.150212	-0.118453	-0.0664706	0.0820413	0.178817	0.17837	0.129488	-0.118787	-0.0253549	-0.0388904	-0.120234	0.108094
CD1B	0.0529881	0.254446	-0.104833	-0.00871086	-0.112673	0.0717068	0.0257044	-0.0672135	-0.108168	0.0811186	0.037487	-0.0268097	0.0208311	0.343184	0.107606	-0.113543	0	-0.0367794	-0.00671244	-0.0158811	-0.113799	0.0146279	0.0579548	0.0891547	-0.0213752	0.0916743	0.0793195	-0.1083	-0.0666766	0.19977	0.00605679	-0.00998354	-0.0465651	0.101964	0.0612392	-0.131348	-0.0355849	0.0970845	-0.0960984	-0.0194836	0.0579524	-0.0838418	0.13669	-0.108353	-0.0968323	0.130107	-0.0640955	0.197118	0.160274
CD1C	-0.164074	-0.0444098	0.156107	-0.403794	-0.129812	0.0148287	0.0168114	0.306811	-0.110346	0.747673	0.639148	0.19118	0.0414252	0.194114	-0.360162	-0.489374	0.245563	0.15248	0.513051	0.426117	0.0679016	-0.271891	-0.318677	0.182276	0.245218	0.0629787	-0.0174108	-0.36013	0.146386	-0.154746	0.152474	0.189731	0	-0.127881	-0.140008	-0.320724	-0.0103712	0.511602	-0.0412679	-0.0120559	0.390266	0.572932	0.504548	-0.137573	-0.271626	0.100906	-0.0780654	0.0909982	0.0312152
CD1D	0.0878367	-0.00946283	0.104397	-0.016427	0.123428	-0.23158	-0.0371575	-0.0391846	-0.0291862	-0.132214	-0.0715957	0.0904093	0.252544	0.0450358	0.340142	0.0776076	0.108798	0.379526	0.111228	-0.00380802	0.0112157	-0.35604	-0.0256557	-0.0964971	0.0394788	0.122431	-0.202854	0.0769215	0.122066	0.137303	-0.0979648	-0.0692491	-0.0976286	0.0263271	0.0478277	0.0431099	0.0524755	0.0723104	-0.133447	-0.0334706	0.150297	0.070343	0.0444078	-0.0329604	-0.0189643	0.0993743	-0.0153375	-0.0469513	-0.119229
CD1E	-0.262613	0.311336	0.229394	0.16362	-0.245377	0.138954	0.0597377	0.00965214	-0.0259991	0.133098	0.102593	-0.152819	0.0746694	0.283485	-0.276307	0.0376754	0.520314	-0.0174723	0.149046	0.344907	0.212947	0.000804	0.156845	0.308587	-0.0397086	-0.125957	-0.362971	0.351882	0.730939	0.441968	0.467195	0.225175	0.422999	0.161193	-0.117888	0.0322351	0.128081	0.372468	-0.201416	-0.0984268	-0.0467234	0.21653	0.193341	0.00454092	0.149144	0.498923	-0.242557	0.14928	0.444481
CD2	0.107816	0.0700226	-0.0818782	-0.067791	-0.00628138	-0.0160069	0.0614576	0.259708	-0.10293	0.429853	0.0565877	-0.0186787	0.288687	0.519781	-0.0337176	-0.0366888	0.120379	0.120071	-0.117743	0.144767	0.0445395	-0.0677977	-0.168314	-0.0195508	-0.0158763	0.116293	-0.0405378	0.130833	0.0018425	0.228134	-0.337911	-0.290634	0.0933352	-0.235566	-0.0833049	0.182696	-0.0624928	-0.0439119	-0.391752	0.0522943	-0.00474215	0.355125	0	-0.0653968	0.0140538	0.227823	0.245921	0.279756	0.091608
CD3D	-0.150603	0.133833	0.220558	-0.0925584	-0.0087924	-0.12738	0.00607252	0.179686	0.156796	0.233164	0.155872	-0.059721	0.203682	0.0871725	-0.404209	0.053647	0.0684981	-0.422615	-0.0929275	0.184655	-0.342813	0.174846	0.114851	0.061923	0.0535688	-0.107609	-0.192589	-0.105783	-0.0104456	-0.0403299	0.0783291	-0.0224814	0.155088	-0.280051	-0.0986204	0.0721655	0.209073	0.0209503	0.0938034	0.00613928	-0.16916	0.328678	0.266601	-0.295741	0.00954771	-0.309008	-0.0150084	0.162984	-0.171274
CD3E	-0.328417	0.166299	0.071476	-0.176575	0.0537481	0.269956	0.0212746	0.00353336	-0.126194	0.150821	-0.0701694	0.113996	0.167121	0.0491352	-0.00464106	-0.00528574	-0.377893	-0.297062	-0.0819407	-0.0459023	-0.0400524	0.0594635	0.0412602	-0.162537	0.0969405	0.0807342	-0.037746	0.185365	0.0610638	-0.00464106	-0.0846934	-0.147542	0.09866	-0.0540547	0.0083065	0.0683413	-0.130158	0.00267363	-0.157419	0.0839162	-0.0597262	0.26394	0.0593948	-0.0583954	-0.158442	0.0914473	0.119869	0.193493	0.205985
CD3G	-0.108562	-0.00820923	0	-0.138338	-0.0955143	-0.187384	0.343993	-0.0164642	-0.35256	0.244955	-0.0494318	0.131238	0.645843	0.129107	0.227352	0.0493975	0.136293	-0.0891023	0.0446019	-0.0334444	0.0317521	-0.320101	-0.0986438	-0.014719	0.0983095	0.152788	-0.313629	0.206621	-0.135887	0.464392	-0.257423	-0.138042	0.272502	-0.092917	-0.114473	0.180479	-0.068315	-0.0629664	-0.227389	0.103578	0.274651	0.45439	-0.10947	-0.0969005	-0.100718	0.501332	0.299252	0.016757	0.0195103
CD247	0.221416	0.252425	-0.0997968	0.145211	-0.0332027	0.295861	-0.309454	0.130002	0.0665674	0.125889	-0.0223737	-0.0408716	-0.0348396	-0.244354	-0.0526586	-0.182412	-0.259438	-0.143375	0.343408	-0.0779662	0.0903373	0.204957	0.0849667	-0.136086	-0.0304728	0.276299	0.0074749	0.299337	0.203021	0.185342	0.0321226	0.148664	0.0556588	-0.0165086	-0.0774479	0.093895	0.00912094	-0.0232997	0.0888243	-0.100172	-0.131415	0.0125794	0.00755072	0.110033	-0.25423	-0.0994763	-0.288396	0.180556	0.130039
CD4	-0.0341301	-0.0336246	0.00350857	-0.104967	0.197833	-0.33719	0.0579948	-0.157357	0.182959	0.357969	-0.469359	-0.108409	0.189385	-0.33821	0.0805378	0.0634165	0.347083	0.170294	0.268597	-0.322836	-0.0781517	0.110648	-0.174011	0.155829	-0.499831	0.375921	0.148726	-0.469811	-0.181863	-0.619469	-0.338305	0.0547609	0.01262	-0.119105	-0.190611	0.0606127	0.346234	0.267347	0.179233	0.0973301	0.379076	0.165379	0.00390148	-0.165002	0.154339	0.411664	-0.306181	-0.304617	0.419764
CD5	-0.188167	0.261009	-0.203158	-0.265949	-0.0665059	0.319819	0.0959458	-0.18357	0.327784	-0.0609698	-0.0861812	-0.182124	0.019732	-0.0285854	-0.149373	0.160234	0.178437	0.0600967	-0.0777154	0.0412574	-0.0577345	-0.128482	0.158554	0.0458689	-0.2153	0.052906	-0.204257	0.172663	-0.0494571	0.0702677	-0.0532217	-0.153555	0.110985	0.0229921	0	0.0469623	-0.0741668	0.136037	-0.0242171	0.15345	0.108317	0.0236068	0.0643606	-0.0133004	-0.0206108	0.0377226	-0.192533	0.113879	0.230616
CD5L	-0.097743	-0.0742188	0.46403	0.153312	-0.228038	-0.801552	0.266636	0.23253	0.438069	0.611091	0.0562916	0.30997	-0.0680952	-0.74712	-0.0338936	-0.114389	-0.5163	-0.507932	0.770486	-0.407716	0.579945	0.74546	-0.452524	0.0686541	0.0940332	-0.12352	-0.40553	0.113805	-0.613387	-0.0144033	-0.130918	-0.0966816	-0.398757	0.0467987	-0.0745449	0.109417	-0.102228	0.222123	0.244349	0.353708	0.254894	0.762593	-0.0945463	-0.213044	0.319559	0.570892	-0.200065	-0.582306	-0.331358
CD6	0.0631299	0.161044	-0.081779	-0.0372548	-0.0935111	0.080986	-0.130834	-0.0338063	-0.101058	-0.0331211	-0.194262	0.12081	-0.160137	0.30494	0.00428438	0.259531	0.0949359	-0.00332022	-0.172857	0.291654	-0.199708	0.0448227	0.359478	-0.0823083	0.0242128	0.222088	0.109179	0.107173	0.216064	0.390368	0.313362	0.0492449	0.0795331	0.0799565	0.0455737	-0.0594716	-0.208462	0.00193214	-0.178111	-0.106561	0.0180154	-0.0863414	0.0738583	0.185725	0.0300241	0.0864763	-0.0397425	0.188839	0.271471
CD7	0.106291	0.239974	0.0276222	-0.0607595	-0.0395994	0.281098	-0.0937943	-0.14045	-0.0139379	-0.406635	-0.231956	-0.165799	-0.360634	-0.155086	-0.182428	-0.0123072	-0.0167952	-0.267068	-0.129714	-0.032341	0.00918198	0.371161	0.160103	-0.0310059	0.223077	0.0489502	0.215221	0.1587	0.137251	0.156196	0.22332	0.25445	0.0294819	0.283312	0.0395222	0.0750084	-0.106143	-0.0016079	-0.185965	-0.0340929	-0.0647068	0.0705299	-0.110993	0.165129	-0.124624	-0.141216	-0.0811005	0.0215378	0.279228
CD8A	0.139393	0.438858	0.349853	0.134587	-0.030498	0	-0.047905	-0.200878	0	0.0164957	-0.173179	-0.257857	0.286813	0.164309	0.235335	-0.388544	-0.101062	-0.176941	-0.384136	-0.116539	-0.243907	-0.198262	-0.397199	-0.112	0.162722	-0.0505619	0.0577736	0.418744	0.0687881	0.138141	0.153629	-0.0226264	0.326317	-0.19558	-0.0633178	0.282877	-0.157195	-0.229768	-0.147413	-0.0326328	-0.121706	0.0497503	-0.300086	0.00237322	0.0896721	0.190545	0.0136576	-0.0844507	0.106225
CD8B	0.0231051	0.199877	0.225045	0.0411491	-0.0736728	0.350084	0.00138712	-0.0118194	-0.0130434	-0.118668	-0.207012	0.0351257	0.0407457	0.0656924	-0.10207	0.129237	-0.17917	0.0676432	-0.0170741	-0.140863	-0.0561361	0.091373	0.127211	-0.15858	0.0977306	-0.0731044	-0.132935	0.156772	0.127394	0.1343	0.114829	-0.107097	0.264026	0.287322	-0.0430756	0.0754294	-0.087707	0.101774	0.0879064	0.127604	0.0315175	0.0142565	0.0277324	-0.0545921	0.0870209	-0.14859	0.067739	-0.188173	-0.0143361
CD9	-0.0589037	-0.505533	0.272413	0.149491	-0.259236	-0.327107	-0.388927	-0.0204906	0.0638857	-0.0150747	-0.396499	-0.196347	0.579233	0.942442	0.129499	0.292925	-0.193372	0.153784	0.457373	0.497971	-0.311202	-0.253518	-0.24881	-0.554804	0.498304	-0.142803	-0.346832	0.218783	0.224432	-0.1504	-0.320689	-0.175478	-0.172694	-0.101071	-0.0424423	-0.498445	0.33396	-0.394903	0.036005	-0.0955472	-0.0523224	0.151896	0.330034	0.212165	0.212483	0.525991	0	-0.0123911	-0.118184
CD14	-0.415689	-0.00376129	0.106153	0.0706921	0.318665	0.0021553	-0.224058	0.110121	0.187549	0.191151	0.0579996	-0.0326567	0	-0.0164099	0.160629	0.306263	-0.173793	-0.0952492	0.18203	-0.511658	0.221853	-0.316727	-0.924481	-0.582771	-0.547276	-0.210208	0.104152	-0.0274229	-0.228155	-0.320945	-0.691844	0.118681	-0.642753	-0.314239	-0.517186	-0.00378895	0.537029	0.12314	-0.0283756	0.147327	0.159338	0.0255699	-0.133167	0.0247402	0.053009	-0.158004	-0.0701237	-0.711042	-0.587794
CD19	0.214417	0.513691	0.168567	-0.0189152	-0.146925	0.314355	0.111613	-0.10755	-0.070477	-0.065083	-0.114337	-0.0982447	-0.0614328	0.02702	0.0475788	0.0521493	-0.0758753	-0.229358	-0.0514646	0.32947	0.00930881	0.0872688	0.130015	0.000832	-0.040091	-0.14224	0.0769811	0.21231	0.312859	0.229985	0.51554	0.1009	0.163141	0.210469	-0.0363741	0.126845	-0.0379887	0.11621	-0.165941	0.0595551	0.0432496	0.0488844	0.00826311	-0.00533962	-0.0608335	0.228314	-0.174525	-0.123882	0.149867
MS4A1	0.207227	0.227246	-0.168984	0.28737	-0.0976911	-0.173128	0.0207424	-0.181676	-0.295465	0.319005	-0.00836992	-0.00621748	-0.255726	0.0109863	0.363265	0.175923	0.26568	0.066576	0.728189	0.371314	-0.0851841	0.275503	-0.0515723	-0.0141988	-0.140893	-0.104216	-0.189815	0.0474586	0.221712	0.0367622	-0.0224352	0.00742578	0.219254	0.000414	-0.0997829	0.0461569	-0.168051	0.338984	0.237865	0.0577106	-0.0170579	-0.0298543	0.11415	-0.0310707	0.165046	0.0166721	0.0830121	0.278293	-0.0125108
MS4A3	0.0685759	-0.095715	0.227021	-0.0450897	-0.101463	0.228707	-0.0587301	-0.10014	-0.0830336	-0.0277958	-0.11668	-0.00534964	-0.0428534	0.233841	0.278577	0.0171971	0.16009	0.000142	-0.0373478	0.00813723	0.0499039	0.0205798	0.38829	0.185348	-0.0561943	0.101611	-0.038723	0.243921	0.0542173	0.0270777	0.158701	0.0115471	0.117385	-0.000132	-0.0327029	-0.0873427	0.058197	0.086586	0.0224361	0.0460696	0.0007	0.0974665	-0.0394244	0.00142098	0.087882	-0.0655212	0.156537	-0.0488138	0.0539231
CD22	0.44463	0.660638	-0.159076	0	-0.0764422	-0.1539	-0.00464344	-0.145988	-0.150473	-0.0447092	-0.0894084	-0.193337	0.270977	-0.111801	0.25071	-0.0855312	-0.0366464	-0.272273	-0.114859	-0.145724	-0.301696	-0.243341	-0.0428014	-0.0381527	-0.0990243	0.263292	0.0684748	0.111599	0.0423927	0.0859551	0.0338135	-0.222918	0.0002	-0.243543	-0.177013	0.213254	0.0165277	-0.111309	-0.251155	0.116588	-0.0818458	-0.380671	-0.17207	0.0371609	-0.402812	-0.118639	0.0937986	-0.0381527	0.125964
CD27	0.0512381	0.261352	-0.185223	0.053411	-0.0673523	-0.0319042	0	0.0926766	0.211898	0.0703216	-0.108337	-0.0280709	-0.165677	0.112992	-0.174422	0.0322118	-0.157413	-0.0370612	-0.206955	0.189293	-0.0327516	0.106203	0.179691	0.318393	0.0310869	0.123836	0.287368	0.236289	0.183687	0.280418	0.28525	0.275843	0.139503	0.0601416	0.0672193	-0.075388	-0.0334496	0.0792785	-0.196603	-0.0952764	0.142272	0.093183	-0.141787	-0.0250077	-0.14185	0.242851	0.11868	0.0323143	0.120183
CD28	0.121116	0.12195	-0.13853	0.121003	0.0641155	-0.187419	-0.229422	-0.10247	-0.0940728	0.0379286	-0.0839019	0.162392	0.087203	-0.184947	-0.0777764	-0.0493669	0.175702	-0.000662	0.0790076	0.143129	0	-0.0103884	-0.0155478	-0.00375223	-0.0468006	0.114339	0.0928702	0.101158	-0.00755501	0.435305	-0.106042	-0.209269	-0.0137	0.0911951	0.0112896	0.155415	-0.00219154	-0.0928698	-0.086648	0.271741	-0.172718	0.265381	0.0365891	-0.0414329	-0.177314	0.0211177	-0.0694566	0.199097	-0.066267
CD80	0.130235	0.14891	0.151084	0.128626	-0.14438	-0.145132	0.30578	0.0571032	0.151783	0.372676	0.0196719	0.233848	0.0176349	-0.199682	0.0296068	-0.0352716	-0.044549	-0.0879221	-0.0742321	-0.110024	0.0886121	-0.0309677	0.57613	-0.010951	0.14978	-0.164452	0.00815773	0.549383	0.083045	0.285843	0.0683832	0.110321	-0.112488	-0.103465	-0.116443	-0.197066	0.196239	0.00466108	-0.117345	-0.00143766	0.149377	0.315555	-0.194872	0.00666142	0.263591	0.0166512	0.131704	0.211153	0.0127797
CD86	-0.019453	0.0697684	-0.223185	-0.110728	0.359161	-0.0223074	0.457136	0.224781	0.0115399	0.622638	0.202442	0.312501	-0.11154	0.0711608	-0.0416975	-0.213588	-0.3328	-0.111668	0.291224	-0.144078	-0.0183182	0.341548	-0.584798	-0.222734	-0.50747	-0.452201	-0.580597	-0.199918	-0.547124	-0.174768	-0.27783	-0.336433	-0.114875	-0.208832	-0.0200353	-0.385479	0.0754037	0.320235	0.109167	0.372828	0.118554	0.411957	0.170724	-0.259085	0.312598	0.0691714	-0.185683	-0.561357	-0.379499
TNFRSF8	0.11949	0.320282	0.28256	-0.00558805	0.0428596	0.500333	0.0204844	0.0101371	0.237956	-0.129887	0.00610065	0.0868654	-0.229141	0.123645	-0.0682063	0.00794983	-0.00103331	-0.0604954	0.154228	-0.0823364	-0.132237	-0.0643778	0.479736	-0.0867438	0.0880976	0	-0.0481544	-0.0498281	-0.0630469	0.0848141	0.271029	-0.000101	0.395864	0.111226	-0.0345707	-0.0114512	0.226328	0.0834246	0.118787	0.0813341	-0.022851	0.126411	0.069972	-0.0291138	-0.0849304	-0.0458355	-0.239598	-0.104234	0.0333486
TNFSF8	-0.151639	0.420885	-0.0195546	-0.143024	-0.139308	-0.0460467	0.272141	-0.160272	-0.370239	-0.0873251	-0.0457206	-0.148773	-0.0170383	0.55806	0.0592184	-0.0707002	0.232481	0.0727992	-0.0420394	0.02455	-0.0217981	0.146056	-0.0818706	0.030839	-0.139916	0.241169	0.034822	0.356786	0.252816	0.11798	0.2507	0.234181	0.0367656	0.170029	0.0131745	0.0575628	0.0944772	-0.21885	0.0594826	-0.0127764	0.0875697	0.0486188	0.0468183	0	0.0222158	0.442261	-0.063776	0.297634	-0.264593
CD33	0.034132	0.0461044	0.603781	0.0702958	-0.151494	0.193449	0.0206265	-0.121184	0.0472655	0.0634646	-0.235887	-0.235298	-0.0869646	0.0766878	0.205865	0.13414	-0.0269165	0.0401049	0.0586076	-0.0634985	0.181818	0.248738	-0.0121942	0.0863938	-0.17244	0.128445	0.14831	0.391297	-0.0204272	0.122818	0.426007	0.0436158	0.283947	-0.0387869	-0.190609	-0.0412893	-0.161862	-0.16941	0.156231	-0.0366716	-0.1922	-0.0975485	0.0374141	-0.0141921	-0.0151606	0.0361819	0.124141	-0.17521	0.367452
SIGLEC6	-0.0701151	0.110663	-0.21415	-0.0667367	-0.0234823	0.479948	-0.109824	-0.070682	0.198825	-0.201261	-0.0620265	-0.0364471	0.00863695	0.0291038	0.216596	0.11983	0.0522776	0.161391	-0.0349727	0.142149	-0.131935	0.00656509	0.0997405	0.0416241	-0.157827	0.101914	-0.125458	0.187617	0.00693846	0.148378	0.292135	-0.0848889	-0.127127	-0.00971889	-0.115514	-0.0599632	0.110262	0.248719	0.0204945	-0.152867	0	0.107762	0.00507355	-0.0034194	-0.315886	-0.0216131	-0.0469522	-0.0481162	0.130826
CD34	-0.238185	-0.26413	0.186853	0.109903	-0.0285969	0.449758	0.146463	0.178354	0.149416	-0.00717163	-0.0413947	0.157374	-0.260924	-0.159204	-0.309062	0.155783	0.101731	0.0647745	-0.0573182	0.51566	-0.00942707	0	0.398202	-0.323456	0.599917	0.387017	-0.0655165	0.316434	0.105431	-0.0627213	0.0596733	-0.00262308	-0.0352898	-0.0176539	-0.120405	-0.346044	-0.00960398	0.115414	0.0539308	-0.150878	0.203649	0.238759	0.087049	0.0179029	-0.0840011	0.394735	-0.11224	0.217213	0.319514
CD36	0.0299454	-0.486073	0.076251	-0.0337152	0.73715	0.194901	0.409756	0.624991	0.333236	0.878596	0.546539	0.633364	-0.374586	-0.38995	-0.451124	-0.456103	-0.00379181	-0.177068	0.867109	-0.818116	-0.184629	0	-0.634004	-0.712748	-0.00400829	-0.455667	-0.264215	-0.198681	-1.52408	-0.487945	-1.31534	-0.541612	0.0676231	-0.0902491	-0.118017	0.631341	0.711604	0.342582	0.399273	0.619868	0.204067	0.289915	-0.272507	0.108017	0.172509	0.276487	-0.314521	-0.204214	-0.394426
SCARB1	0.345738	0.249881	0.0895042	0.254309	-0.329732	-0.333969	-0.209077	-0.462993	-0.451704	-0.402266	-0.538825	-0.380681	0.320066	0.190917	0.441278	0.45172	0.586195	0.37656	-0.387714	-0.0835085	0.0851078	-0.380695	-0.428986	0.118639	0.0266676	0.485931	0.25961	0.252016	-0.0928354	0.23504	-0.0261307	-0.0041008	-0.133051	0.0979748	-0.0311499	0.00299263	-0.333779	-0.315092	-0.322423	-0.250724	-0.201275	-0.512223	-0.384357	-0.158351	0.252151	0.0192165	-0.00536537	-0.327819	0.101025
SCARB2	0.0566092	0.0162201	0.176026	0.0630436	0.134584	0.219332	0.357544	0.213076	0.123816	-0.361547	0.19418	0.216326	0.113566	-0.00933361	0.0209541	-0.255163	-0.162893	0.217044	0.21252	-0.450197	-0.0712376	-0.475228	-0.84508	-0.132709	-0.36421	-0.330667	-0.186707	-0.362857	-0.398449	-0.411499	-0.953913	0	-0.206844	-0.0263309	-0.0877562	-0.0324755	0.373256	-0.0234003	0.0810127	0.205509	-0.0385313	0.160555	0.140129	-0.14683	-0.368828	0.0775681	-0.387397	-0.593034	-0.443007
CD37	-0.201621	0.201528	0.158597	0.00352097	-0.189622	0.191367	-0.36306	-0.308945	-0.321343	0.0705976	-0.165858	-0.166469	-0.0261412	0.139453	0	-0.171536	0.0970182	-0.467872	0.011353	0.163171	0.0632539	0.0375886	0.433314	0.130825	0.00352097	0.314448	0.0923996	0.119621	0.304718	0.0481262	0.0303884	0.0894504	0.255421	-0.277983	-0.0612626	-0.0454369	-0.288429	0.106271	-0.160369	-0.0852714	-0.135316	-0.26402	-0.0116844	-0.0361724	0.248331	0.281921	-0.06074	0.0295897	0.414074
CD38	-0.131928	-0.159357	0.286677	0.068923	-0.005445	-0.303394	0.0760875	-0.083704	-0.0700183	0.222178	-0.243021	0.0850406	0.0956616	-0.367554	-0.200201	0	0.0625215	0.0860972	0.0818634	-0.0333514	0.0633869	0.325614	-0.740576	0.0517235	-0.180969	-0.212045	-0.490135	0.313638	0.366634	-0.165235	0.293333	-0.193394	-0.0541682	0.153224	-0.071001	-0.0628333	0.0327835	-0.0306463	0.117518	0.0673962	-0.000664	0.263934	-0.00904322	-0.0248237	0.230522	0.28964	-0.0750751	-0.149037	-0.178199
ENTPD1	-0.177741	0.0210419	-0.0454288	0.0877485	0.296988	-0.153748	0.162626	-0.0421515	-0.0210462	0.520995	0.329816	0.106034	0.156432	0.0986185	0.10957	-0.214484	-0.0576072	-0.247871	0.160766	0.579972	-0.201311	0.29584	-0.108773	0.0879054	0.0187202	-0.115847	-0.214876	0.272234	-0.0197105	0.10033	0.146375	-0.196239	-0.269066	-0.338907	-0.159203	-0.402172	-0.165388	-0.157269	0.00628424	0.189284	0.10798	0.118443	0.00654364	-0.0445895	-0.345848	0.0855913	0.0577044	0.0819321	-0.0354505
ENTPD2	0.0167847	0.0583673	0.121123	-0.0396194	0.0531907	0.329749	0.0203319	-0.0192327	0.278223	-0.125582	0.0523438	0.0165262	0.0404234	0.0532808	0.214872	-0.0795469	0.0122986	-0.0348859	-0.0703912	-0.325966	-0.382425	-0.125246	0.26348	-0.161973	0.00259113	-0.143556	-0.12745	0.0627532	0.137632	0.216187	-0.148832	-0.0802698	-0.0414062	-0.100765	-0.117617	-0.178772	0.152359	-0.0643125	0.0908556	0.152219	0.15536	0.147396	0.0847869	-0.104701	-0.155942	-0.0563788	-0.144563	-0.200736	-0.0169253
ENTPD6	0.300519	0.120349	0.123282	0.0657597	-0.139484	-0.310009	-0.262432	-0.220149	-0.548648	-0.414131	-0.314742	-0.305319	0.104374	-0.0875678	0.102676	0.187632	0.213876	0.0765519	-0.140032	0.0996971	0.310338	0.105124	-0.114369	0.0278873	0.113737	0.359642	-0.0698757	-0.0298114	0.0431457	0.159499	-0.264039	0	-0.105908	0.149758	0.0116029	0.153063	-0.246264	-0.225721	-0.206719	-0.0849772	-0.325928	-0.339151	-0.417104	0.048245	0.0759864	0.07725	-0.113228	0.051352	-0.0240026
ENTPD3	-0.051671	0.00817871	0.0664339	0.0230885	-0.0373301	0.0241566	-0.0094738	0.107928	0.0876203	-0.130718	0.0527596	0.0175233	0.0138726	0.0169048	0.210534	0.120106	-0.0660834	-0.231895	0.0431013	-0.160919	-0.160435	0.0356545	0.129796	0.0221639	-0.070303	-0.0666614	-0.196252	0.263618	0.209525	0.0566325	0.157804	0.283243	0.237533	0.265529	0.037365	-0.142404	-0.0625868	-0.0760274	-0.182094	-0.0314312	0.0317683	0.161026	0.0494776	-0.00197458	-0.0163498	-0.223482	-0.0365667	-0.0795813	0.0294175
ENTPD5	0.34857	-0.141354	-0.134667	-0.406115	0.2336	-0.438388	0.552447	0.592019	0.29198	0.313186	0.337801	0.309217	0	-0.363352	-0.128665	-0.0988216	0.218137	0.204514	0.411479	-0.252794	0.0970345	-0.347533	-0.662661	0.00973415	-0.154439	0.0829859	-0.15733	-0.420563	-0.408803	-0.200305	-0.669857	-0.695889	-0.0922785	-0.243832	0.0524492	0.123561	0.323352	0.409874	-0.0585461	0.427203	0.253749	0.074357	0.0851469	-0.00602245	-0.327241	-0.0979013	-0.331066	-0.403881	-0.33974
CD40	-0.104426	-0.0623789	-0.261895	-0.0213699	0.144209	0.0759277	0.0623608	0.358806	0.260528	0.404152	0.0952921	0.123117	0.0530224	-0.222718	0.107547	-0.137125	-0.0883546	0.137878	0.183037	-0.276998	0.100706	-0.105949	-0.0257392	-0.0916948	-0.203541	-0.127751	-0.0233026	-0.213781	-0.00551605	-0.334842	-0.0540962	-0.00197506	-0.214193	-0.308866	-0.165318	0.118182	0.0101881	0.218563	-0.0916443	0.172585	0.101892	0.124418	0.0374417	0.168731	0	0.176882	0.162788	-0.0936351	-0.0292978
CD40LG	0.0546446	0.0687928	0.0572968	0.0210848	-0.00185537	-0.0330224	-0.0975847	-0.0125093	-0.0261292	0.00752306	-0.137847	-0.0236864	0.0893388	0.0612159	0.0342598	0	0.0451708	0.0316668	-0.0894394	0.112759	-0.0210772	-0.0501237	0.0256152	0.0718184	-0.0591726	0.14045	0.0524316	-0.0372586	0.0515666	0.0849986	0.07798	0.0999112	0.118649	-0.0209708	-0.0222139	0.0643764	0.00874948	-0.0659313	0.0983019	-0.074451	0.132963	0.0257282	0.094811	-0.0202723	0.0242348	0.0373788	0.140368	-0.0988479	0.185919
CD44	-0.201097	-0.154285	-0.164072	-0.220838	-0.22663	0.150938	-0.108313	-0.182491	0.132063	0.294867	-0.281495	0.0901918	0.165246	0.132355	-0.100142	0.104187	-0.052506	-0.0931864	-0.0731587	0.219153	0.218308	-0.00160074	0.183202	-0.218581	-0.0346799	0.167198	-0.0878143	0.165049	-0.158372	0.188694	-0.192117	0.289169	-0.121839	-0.153208	-0.0857706	-0.191106	-0.350219	-0.0279779	0.163567	0.113992	0	0.120553	0.262435	0.211906	0.495681	0.283775	-0.320998	-0.0177512	0.237956
CD47	0.0456038	-0.259199	0.156146	-0.115648	-0.0131674	-0.18227	-0.0725632	0.125939	0.143594	0.322796	0.201522	0.127142	0.125306	0.0824833	-0.083169	-0.128206	0.0895691	-0.0960875	0.225464	-0.0578251	0.0547037	0.0287237	-0.804231	0.0471821	0.0218277	-0.34207	-0.233727	-0.215942	-0.354335	-0.154982	-0.496059	-0.166083	-0.00901508	-0.187147	-0.21539	-0.0620289	-0.083992	-0.0587444	-0.0419035	0.0234833	0.0617075	0.0795279	0	-0.10768	0.0805616	0.126209	-0.191	-0.0563641	-0.392804
CD48	0.0938172	0.227362	0.036417	-0.0917487	-0.138209	-0.439269	-0.235383	-0.215825	0.212819	0.340082	0.184678	-0.0124021	0.232569	0.175355	0.142544	0.0841413	-0.132745	-0.0263596	0.400981	0.290443	0.0947394	0.198508	-0.428461	0.0639057	-0.00885105	-0.126805	-0.0747285	0.545225	-0.23873	0.213446	-0.389354	-0.0339527	0.207377	-0.176361	-0.105655	0.054605	-0.317513	-0.0195823	-0.377124	-0.154354	-0.293733	0.376555	-0.0815096	0.0578885	0.329533	0.36558	0.0918531	0.311282	-0.188394
CD53	-0.276584	-0.163431	-0.164547	-0.289453	0.155377	-0.116718	0.685194	0.434976	0.54656	0.831131	0.292701	0.179481	0.145137	0.169107	-0.219875	-0.229028	-0.0680075	-0.20752	0.382621	-0.313557	0.0337334	0.214047	-0.780116	-0.288629	-0.558421	-0.343632	-0.560101	-0.183451	-0.351201	-0.494207	-0.299837	-0.390851	-0.341262	-0.650271	-0.594822	-0.364175	0.242559	0.27732	0.213029	0.460197	0.294251	0.782484	0.41397	-0.415137	0.531602	-0.0721417	-0.0817957	-0.216376	-0.391913
CD58	-0.0443854	-0.530457	0.0808158	-0.00608778	0.146579	-0.17244	0.255642	0.175765	-0.0438924	0.220331	0.11858	0.27224	-0.136665	-0.208739	-0.228216	-0.196792	-0.25815	-0.109714	0.191776	0.154961	-0.209037	0.00280237	-0.204369	0.138268	0.0289321	-0.176385	-0.358576	-0.215132	-0.21033	-0.160882	-0.288959	-0.267745	-0.223582	-0.311009	-0.148135	0.0503507	-0.0849657	-0.0773854	0.168153	0.154247	0.0130477	0.116015	-0.0372791	-0.11846	-0.115841	-0.0852342	0.0726957	-0.177768	-0.223689
CD59	-0.0848389	-0.378185	-0.183474	-0.38527	0.341211	-0.25928	0.0975742	0.183102	-0.0617342	0.373084	0.514257	0.0345488	-0.361539	-0.0596457	-0.290775	0.0127735	-0.117167	-0.116355	0.392495	-0.0637493	0.0679407	-0.41428	-0.820346	-0.194842	-0.0547724	-0.37113	-0.460105	-0.241938	-0.386412	-0.572644	-0.7094	-0.153781	-0.405269	-0.110322	-0.701296	-0.306177	0.193736	0.0432978	0.176693	0.148737	0.117443	0.0967693	0.316847	0.0479403	0.14675	0.203764	-0.300949	-0.416912	-0.405682
CD63	-0.37679	0.0709047	-0.209052	-0.112943	0.0971813	0.477635	0.0765104	0.448593	0.426276	0.109001	0.352641	0.122611	-0.206707	-0.0665627	-0.259301	-0.141114	-0.312249	-0.322676	0.123808	-0.0286503	-0.0271454	-0.304584	-0.436668	-0.0285053	-0.238848	0.013525	-0.0996304	0	0.00012	-0.263112	-0.250285	-0.156581	-0.291003	-0.145901	-0.576843	-0.294158	-0.0497942	0.105061	0.265405	0.264856	0.217372	0.298995	0.29371	-0.131096	0.159445	-0.163354	0.043355	-0.178357	0.0346394
CD68	0.12886	0.320499	0.0759401	-0.0329952	0.0881023	0.179339	0.161598	-0.175893	-0.0336704	0.207145	-0.257217	-0.0701113	0.0900049	0.244587	0.226429	0.414046	0.217805	0.297939	0.154663	-0.316978	0.202108	0.341353	-0.0723753	-0.0264912	-0.246685	-0.0979691	-0.116391	0.312645	-0.0899	-0.501169	-0.142062	0.230316	0.00654411	0.152452	-0.25928	-0.154936	0	0.222314	0.0909672	0.0516901	0.16857	0.216435	-0.113533	0.0805521	0.331948	0.318949	0.160268	-0.319246	-0.0419521
CD69	-0.0376544	0.262644	0.266578	-0.168557	-0.443482	0.00331259	0.343597	0.512919	0.801253	0.54491	0.366223	-0.0721335	0.334647	0.943734	-0.129223	-0.317958	-0.254104	-0.160313	0.355105	-0.143752	-0.222948	0.0379691	0.0479708	-0.136778	-0.168535	0.143054	0.0167127	0.157968	0.13659	0.201521	-0.457341	0.229313	0.0564113	0.371529	-0.226303	-0.021666	0.154833	0.105672	-0.144849	0.359046	0.227528	0.754487	0.0892186	-0.30677	-0.0180149	0.314854	-0.210557	0.0736933	0.201088
CD70	0.140893	0.50453	0.274623	0.236797	-0.293319	-0.446312	-0.158365	-0.394843	-0.13658	-0.365501	-0.278384	-0.474275	-0.56995	-0.342883	-0.0383511	-0.0798292	-0.503261	0.0505509	-0.347232	0.445802	0.0668249	0.195819	0.684775	0.437489	0.353817	0.0633674	0.375911	0.348224	0.414162	0.204052	0.618266	0.294041	0.284441	-0.0970397	0.230872	0.43112	-0.0691834	-0.398747	-0.118296	-0.242637	-0.282838	-0.34939	-0.151063	0.351622	0.105961	0.14994	0.144935	0.550681	0.424102
CD72	-0.313324	0.274949	0.140291	0.0285292	0.143636	-0.0597529	0.128075	0.323113	0.156097	0.215656	-0.0968165	0.128164	0.0335855	-0.290128	-0.0142708	-0.020113	-0.0478139	-0.369641	0.333568	-0.0738697	-0.228046	0.19941	0.0207143	-0.164088	-0.247624	0.053308	-0.124378	0.0856776	-0.141671	-0.171538	-0.0702052	0.190481	-0.102788	-0.257381	-0.194438	0.00297737	0.0521741	-0.192609	0.00555992	0.358622	-0.089345	0.164083	-0.0219779	0.0126033	0.31524	0.208127	0.093051	-0.0154343	-0.0897913
CD74	-0.358681	0.199218	0.0507021	-0.0878706	0.167495	0.196034	0.112574	-0.0947885	-0.170329	0.493041	-0.0565977	0.0750017	0.30145	0.386932	0.257462	0.273281	0.113169	0.0574379	0.335163	0.16248	0.319019	0.133572	-0.315851	-0.0794077	-0.0857792	0.135824	-0.17447	0.259445	-0.132482	-0.244796	0.0241919	0.364718	-0.161579	-0.0027914	-0.196409	-0.455398	-0.130829	0.38026	0.0870237	0.222879	0.341253	0.314823	-0.24013	-0.0598516	0.344862	0.357141	-0.0436306	-0.331707	0.16372
CD79A	-0.0392575	0.40717	0.115705	0.14779	-0.0217614	-0.0115957	-0.0406547	-0.167786	0.0668607	-0.0712261	-0.161864	0.135339	-0.446947	-0.340347	-0.132901	-0.189226	0.069241	-0.105429	0.0605826	0.185535	0.0775442	0.107133	0.205739	0.262632	0.0596094	-0.0171466	0.00909567	0.105397	-0.0667858	0.0937142	0.216077	0.212297	0.0746579	0.0999899	-0.0241251	0.0445628	-0.154548	0.0754633	-0.0450468	0.0813823	0.0187435	0.0425243	-0.0850496	0.0966248	-0.0612559	-0.0983086	-0.00254917	-0.100097	0.120747
CD79B	-0.0275817	-0.0910702	-0.00605202	0.060164	-0.0974488	-0.00643539	0.0191784	0.13562	0.0872011	-0.286974	-0.120285	-0.0724192	-0.272349	-0.193081	-0.24742	0.0057621	-0.105108	-0.149872	-0.0185719	-0.0825892	-0.0142455	-0.32496	0.0802336	-0.287685	0.0655661	0.0825572	-0.03303	0.238604	0.352905	-0.0319867	0.1987	0.111632	0.12001	-0.00512648	-0.0989928	0.0375662	-0.0253801	-0.0423222	0.0442596	0.0576777	-0.108943	0.0384145	-0.0205684	-0.071784	-0.0609093	-0.166934	-0.0972152	0.0121636	0.0150547
CD81	-0.0181065	0.257467	0.0672045	0.0815639	-0.372703	-0.341387	-0.744537	-0.534188	-0.612625	-0.40613	-0.576362	-0.54924	0.487258	0.457379	0.550674	0.549258	0.237505	0.203294	-0.57232	0.0396261	0.104109	-0.434775	-0.54562	-0.130076	0.217217	0.301334	-0.00619507	0.0971823	0.235059	0.06952	-0.556906	-0.0505457	-0.503185	0.273539	0.0689278	0.169832	-0.360722	-0.411284	-0.492103	-0.296836	-0.31127	-0.530201	-0.60227	0.0048542	0.19066	0.292635	-0.100232	-0.000198	0.00230408
ADGRE5	-0.0151525	0.106554	0.285177	-0.0470023	-0.0732522	-0.0571389	-0.323373	-0.252076	0.00629044	0.0742526	-0.03724	-0.336768	0.339972	0.135442	0.240963	-0.132553	0.0650182	0.217617	-0.0552964	-0.0196819	0.110855	0.157314	-0.413515	0.219658	0.0148478	-0.0392556	-0.152712	-0.0822792	0.273837	0.13512	0.0464516	-0.338106	-0.312866	-0.0860534	-0.207299	-0.079566	-0.0296278	-0.0120649	0.0134277	0.0147228	0.0851884	0.189126	-0.136143	0.00901794	0.0483871	0.165517	-0.148308	0.0546699	0.259305
CD151	0.341454	0.0325928	-0.145789	-0.162724	-0.167391	-0.325419	-0.679841	-0.312968	-0.249931	-0.113006	-0.0284472	0.0515566	-0.25477	-0.195094	-0.269484	0.141008	0.270532	-0.391691	0.160841	0.223837	0.404729	-0.259628	-0.167604	0.228333	0.089963	0.667193	0.133825	0.468045	0.0288973	0.090622	0.0884123	0.163508	-0.13229	0.138584	-0.502542	-0.0257578	-0.326382	0.394058	0.064415	0.237492	0.288374	-0.315847	-0.0303679	0.21529	0.246077	-0.142269	0.407339	-0.325059	0.0409069
CDA	0.219528	0.373024	-0.166044	-0.104892	0.151762	0.0939341	0.0602689	-0.437112	-0.00577116	-0.194424	-0.0806594	0.0606246	0.451651	0.145701	0.367369	0.178148	0.211987	0.0304689	0.00644875	-0.232675	-0.126066	-0.396266	-0.178867	0.233798	-0.252391	0.0685797	-0.0342255	0.159279	0.412681	0.290087	0.0729799	-0.129762	-0.477166	0.0294619	0.381962	0.0296922	-0.207183	0.173668	0.212741	0.0621543	-0.191231	-0.418321	0.025732	-0.0310202	-0.586548	0.123394	0.344459	-0.0997066	0.0608702
CDK1	-0.0528407	0.0121498	-0.0543327	-0.0177789	-0.0764947	-0.0510902	-0.00752783	-0.0335126	0.000696	-0.0572453	-0.0147424	-0.031899	-0.108876	0.17148	-0.00718021	-0.00957537	0.0939703	-0.131371	-0.0390625	0.0356736	-0.0478797	0	-0.0990934	0.309165	0.045239	0.00395966	-0.0634103	0.111016	0.119796	0.130478	0.00297499	0.178684	0.0433521	-0.0605516	0.105968	-0.0478096	-0.0770946	-0.0550661	-0.0600095	0.0127463	-0.0859985	-0.0526977	0.0128732	-0.0241995	-0.0974293	0.0878797	0.0616789	0.214106	-0.0306916
LRBA	0.0350065	-0.210197	0.0289907	-0.233752	0.19616	0.0736189	0.2391	0.2002	0.146243	0.388035	0.400781	0.362873	0.0488396	-0.0349188	0.0290241	-0.144881	0.0465355	-0.0623388	0.138654	-0.0569658	0.0405903	-0.1884	-0.471902	-0.00378704	0.0810099	-0.110939	-0.116173	-0.21197	-0.0715418	-0.19378	-0.470423	-0.0185299	-0.246743	-0.0634918	-0.167342	-0.207191	0.254863	0.473089	0.259261	0.163534	0.342407	0.329777	0.271433	-0.076211	-0.136215	0.121723	-0.0655756	-0.161724	-0.322595
CDC5L	0.0637846	-0.20758	0.0646639	-0.0808735	0.437129	-0.158613	0.117822	0.232684	0.07971	0.40694	0.292932	0.257007	0.325711	-0.118929	-0.0766659	0.0901661	-0.052968	-0.0458231	0.372191	-0.087245	0.160267	-0.140892	-0.360905	0.127472	-0.174524	-0.013525	-0.105332	-0.0492296	-0.259172	-0.177884	-0.467545	-0.24103	-0.162879	-0.0108099	0	-0.105092	0.175408	0.282949	-0.013751	0.250457	0.0176659	0.0324926	0.223944	-0.00945568	-0.244533	0.100446	-0.039588	-0.00656796	-0.194768
2018-07-10	-0.00679541	-0.408076	0.161397	0.0981464	0.223582	-0.342906	0.199973	0.468231	0.373773	0.866965	0.425779	0.469052	-0.15243	-0.328426	-0.300787	-0.327754	-0.367037	-0.321335	0.511328	0.00878954	0.00427675	-0.264215	-0.282894	-0.129609	-0.130514	-0.211182	-0.12384	-0.433813	-0.338914	-0.605793	-0.735244	-0.0211682	0.267219	-0.0846129	-0.213741	0.0106225	0.311942	0.222847	-0.072618	0.0111742	0.214156	0.338225	0.535861	-0.0852833	0.0842466	-0.213696	0.160916	-0.177487	-0.395389
CDC6	-0.279055	-0.342855	-0.453	0.109606	0.078218	-0.178957	0.105484	0.0246763	-0.080451	0.147576	0.0433516	0.0809646	-0.0502634	-0.372505	0.222432	-0.0903254	0.0761666	-0.20244	0.764298	0.165584	-0.062511	-0.0736661	0.0655246	-0.399299	-0.258244	0.0946021	-0.0312619	-0.214504	-0.449747	-0.265861	-0.0335855	-0.231722	-0.246289	-0.405497	-0.245445	0.327069	0.16653	-0.244517	-0.307426	0.147955	0.706864	0	0.307115	-0.0313215	1.34252	-0.117003	0.105741	-0.219037	-0.312148
CDC20	-0.16892	0.486106	0.0149527	-0.0439968	-0.128604	0.286716	-0.200714	-0.0138907	-0.0889578	0.0476775	-0.0413399	-0.113051	0.180706	0.0825	0.38117	0.070703	-0.1526	0.0542555	-0.164017	-0.0032506	0.0391092	0.0658951	0.376666	0.361728	-0.0208583	0.236367	0.0957723	0.266716	0.274803	0.193436	0.2273	0.144008	-0.126646	0.0224891	-0.149428	-0.0599222	0.0870304	-0.0160398	0.0190191	-0.291807	0.0372272	-0.0112472	0.256333	-0.0496097	-0.263446	0.050467	0.142975	0.231432	-0.0974331
CDC25A	0.0984635	-0.0593386	0.0225983	0.00951815	-0.0660634	0.143174	-0.136727	-0.0952687	0.132893	-0.124158	-0.106351	-0.129762	-0.209887	-0.0018878	0.210846	0.157554	0.0289412	-0.0447207	-0.109531	0.093205	-0.0793204	-0.0294909	0.31605	-0.0469427	0.0649605	0.0822248	0.0822821	0.0747938	0.0687337	0.246336	0.324952	-0.0362434	-0.0388069	0.0350471	-0.00979853	0.178068	-0.0404258	-0.0786657	0.073266	-0.119228	-0.0596704	-0.104878	-0.00354862	0.145594	0.0277538	-0.209864	0.0320201	0.140832	0.0439205
CDC25B	0.326406	0.0142388	0.135509	0.0673146	0.0166979	-0.113233	-0.112986	-0.11795	-0.283564	-0.132148	0.0077219	-0.0761871	0.394699	0.394877	0.352105	0.261352	0.518982	-0.140663	-0.18126	0.32158	0.122729	-0.119032	0.286025	0.328523	0.205785	0.429995	-0.342648	0.119428	-0.117475	0.246679	0.0694947	0.0680714	-0.00529289	0.18366	-0.0845184	0.244224	-0.303156	0.14491	-0.0317082	-0.000601	-0.220977	0.0253954	-0.0404401	-0.0220704	0.101002	0.0865293	-0.0331082	0.184158	0.40836
CDC25C	0.143614	-0.000469	0.223371	-0.0523577	0.0198355	-0.201142	-0.0311713	-0.0526237	-0.0140972	-0.0588913	-0.20497	0.0579023	0.0662632	0.0665202	0.0430799	-0.0553293	-0.0014658	-0.0815668	-0.16434	0.0122056	-0.103828	0.0234308	0.188453	0.093255	0.0846882	0.145473	-0.0138259	0.088758	0.197289	0.15188	0.384212	-0.0541787	0.220746	-0.0355792	-0.0790544	-0.0436173	0.0440474	0.0688491	-0.150434	-0.13884	-0.0120468	0.0285959	0.0997281	0.0784707	-0.125335	0.0221262	0.171124	0.211279	0.00815296
CDC27	-0.235096	-0.0182695	-0.0492826	-0.133636	0.162468	-0.147924	0.205952	0.200569	-0.158556	0.505217	0.270316	0.424753	-0.299674	-0.174397	0.0760179	-0.0499163	-0.224754	0.0120173	0.412643	0.0181408	0.179877	-0.292211	0.0937285	-0.219516	-0.0241423	-0.409035	-0.111209	-0.104828	-0.400756	0	-0.334527	-0.222572	-0.0823617	-0.265975	-0.0451055	-0.00245237	0.156052	0.130864	0.0558949	0.170546	0.288878	-0.107094	0.0258145	-0.27877	0.1172	0.0275207	-0.324366	-0.092032	-0.34501
CDC34	0.360602	0.512148	0.136436	0.177938	-0.498205	-0.216571	-0.569305	-0.58217	-0.787132	-0.756128	-0.689617	-0.664555	-0.218188	-0.291183	-0.218894	0.0455017	-0.22373	-0.526021	-0.499971	0.0503778	0.17092	-0.0619822	0.170067	0.188404	0.176906	0.266428	0.45089	0.020946	0.12866	-0.0318961	-0.0560837	0.307077	0.0877848	0.31214	0.3327	0.294921	-0.370383	-0.570693	-0.536296	-0.44	-0.687036	-0.590252	-0.521512	0.304819	0.0836	0.234643	0.157095	0.175779	0.50585
CDC42	0.0261874	-0.315241	-0.320787	0.0843372	0.0132899	0.114961	0.374009	0.227261	0.0411406	0.356318	0.342888	0.109517	0.0525031	0.0447721	-0.0218544	-0.124425	0.0391059	0.365615	0.0915642	-0.0166078	-0.278386	-0.117862	-0.366711	-0.0954285	0.00691986	-0.149243	-0.201994	-0.300361	-0.292986	-0.268832	-0.0550346	-0.163009	-0.154606	0.00572729	-0.347874	-0.157937	0.137935	0.136692	0.225193	0.0658326	0.438636	0.231735	0.296884	-0.00456333	0.105432	0.0161147	0	-0.0758581	-0.161319
CDH1	0.195389	0.245456	-0.50136	0.169215	0.240324	0.279611	-0.123059	0.133979	-0.506184	-0.242749	0.0449638	0.438622	0.329929	0.0962648	0.155233	0.574768	0.454855	0.346006	0.292861	0.0845308	0.0398455	-0.312268	-0.288572	0.0936756	0.205597	0.285084	-0.0860195	-0.0574493	-0.448009	-0.0220613	-0.462611	-0.0912561	0.0142698	0.311839	0.0777245	0.142624	0.00740719	0.130082	-0.00495243	0.326323	0.441684	-0.0656576	-0.0257177	-0.341945	-0.0630016	-0.339056	-0.137417	-0.206445	-0.0576143
CDH2	0.103897	0.22911	0.0927095	-0.0347319	0.405426	0.228767	-0.0126886	0.0938787	-0.178215	0.323753	0.24439	0.316276	0.148183	0	-0.161269	0.130278	0.208692	0.0748425	0.0288687	-0.297751	-0.19319	-0.402967	-0.770768	-0.0670156	-0.186876	-0.0359468	-0.311835	-0.233037	-0.0118952	-0.133421	-0.760193	-0.300178	-0.424912	-0.220205	0.0766802	-0.21707	0.0632677	0.29553	0.206014	0.133043	-0.0877962	0.195444	0.0580397	-0.174285	-0.311651	0.169534	-0.248898	-0.593735	-0.394893
CDH3	0.0306334	0.227343	-0.0158124	-0.0589948	-0.0282955	0.223838	-0.0149384	0.105741	-0.0649753	0.0126538	0.0210862	-0.0351028	-0.0496798	0.0199609	0.0564847	-0.00180149	-0.154015	-0.141057	-0.02461	0.00310087	-0.0736918	0.0669518	0.141096	-0.127485	0.00333595	0.167982	0.00333595	-0.0215621	0.191662	-0.00518608	0.144767	-0.0213361	0.196644	0.110494	0.0785995	-0.00333738	0.0481486	0.0203514	0.0190964	-0.0453649	0.0160666	0.109887	0	0.0408487	-0.0854316	-0.00252771	0.0779481	-0.0955477	0.0254269
CDH4	0.170575	0.370004	0.254589	0.128469	-0.132987	0.0987716	-0.0780182	-0.155215	-0.0646663	-0.209738	-0.196737	-0.053525	-0.139514	-0.0766683	-0.141216	-0.193848	-0.0324202	-0.311781	-0.01437	0.0434279	-0.00367212	0.0930119	0.194729	0.0553517	0.0314507	0.0331073	0.142251	0.210854	0.246652	0.107371	0.378616	0.154548	0.222639	0.321508	0.206606	-0.0467839	-0.0446286	-0.0429187	-0.0245686	0.181162	0.0306811	0.000391	-0.110002	-0.015861	-0.2369	-0.0650005	-0.0184641	-0.189803	0.0570688
CDH5	-0.0141716	-0.117735	-0.004601	0.0968447	-0.0353832	-0.0904002	-0.0366712	-0.223258	0.000555	0	-0.323508	0.00580454	0.52249	0.149023	0.17742	0.20556	0.183416	0.166978	0.0712357	-0.0177865	0.135839	0.212582	0.0278468	0.0202298	-0.218716	0.0561452	-0.00743246	0.187369	0.251732	0.0146484	0.0895333	0.0187297	0.069807	0.0543284	-0.109606	-0.0564613	0.106041	-0.0654106	0.0158849	-0.231856	-0.00410557	-0.0540695	-0.153591	0.117504	-0.0266204	0.241786	0.0681395	-0.0376306	0.210786
CDH6	-0.0876727	0.187597	-0.185669	0.0264516	0.0355558	0.0562844	0.102238	0.0051713	0.0739617	0.326274	0.00607681	-0.1363	-0.311626	0.158066	-0.0612412	0.0969896	0.0655551	-0.324058	0.11214	0.222419	-0.210282	-0.00112438	-0.268031	-0.116185	0.331469	-0.221569	-0.0450401	0.0687127	0.137297	-0.0728965	0.100615	0.0531011	-0.0324473	-0.110668	-0.246289	-0.378933	-0.0266366	0.109868	0.0188613	-0.13941	0.274308	-0.0647922	0.104866	-0.0161853	-0.0888643	0.220132	-0.179938	-0.0685577	0.128154
CDH7	-0.120547	0.172487	-0.0697308	0.0356517	-0.0284147	0.0385447	-0.168836	-0.0365877	-0.027926	-0.0882492	-0.090354	-0.0807314	0.0477028	0.198189	0.102278	0.00799417	0.121979	0.0428395	-0.030129	0.120543	-0.024209	-0.0295429	0.289844	-0.114319	-0.0218835	-0.065402	0.0248213	-0.0314217	0.257465	0.0343509	0.0499749	0.0602984	0.029099	-0.0883379	0.11302	0.213317	-0.0420446	-0.0443149	-0.155903	-0.000574	-0.10117	0.0851092	0.0073595	0.0923586	-0.057085	0.0191665	0	0.175479	-0.004632
CDH8	-0.00912857	-0.0430531	-0.101728	0.0838728	-0.100245	0.145021	-0.023324	0.0441771	0.119975	-0.000219	-0.0563345	0.0380926	-0.0661268	0.170525	0.109132	0.21897	0.00239468	-0.149446	-0.130842	-0.0583205	-0.168121	0.0154023	0.0272684	0.118227	0.139879	0.112554	0.015295	-0.031796	0.0876837	0.196341	0.134784	-0.143346	0.053287	0.0036869	0.0625477	-0.0358062	-0.0507741	-0.0688753	0.0450501	-0.12582	0.0728993	0.123562	-0.165535	0.0689707	-0.111302	-0.064642	-0.0216184	0.0218792	0.0658298
CDH9	0.0188379	0.0382538	0.0040822	0.0557866	0.0320697	-0.0219474	-0.0387554	0.00933981	-0.117284	-0.0877295	-0.0225496	-0.0802093	0.0135341	0.0390387	0.0446291	0.0287099	0.00473356	0.188759	-0.0348344	0.0272064	0.0347924	0.0151262	0.0553904	0.0117126	0.0374575	0.0589924	0.0462127	0.0662498	-0.0782423	-0.0649071	0.14847	0.0724549	0.0446596	0.104486	0.0103579	0.0909214	0.0322614	0.0475912	0	-0.0257039	-0.0454311	-0.0132427	-0.0818672	0.0907631	-0.0157909	-0.0206733	0.0486631	0.000133	-0.0891466
CDH10	0.0918035	0.0767584	-0.0116143	0.0567937	-0.0830574	0.0416136	0.00579643	-0.0153646	0.112036	-0.101719	-0.119416	-0.0901442	0.0954461	0.0466661	0.124415	-0.0270634	-0.00537491	0.108579	-0.0591588	0.0282774	-0.0387726	0.207664	0.0789957	0.0501037	0.0021863	0.0422974	0.173369	0.17661	0.110149	0.233981	0.293031	0.0861936	-0.00270701	0.0775328	-0.0482168	0.115841	-0.109192	0.0122271	0.052866	-0.0198388	-0.0333419	-0.0872121	-0.114771	-0.0274057	-0.0972095	-0.00353003	0.0277948	-0.00537491	-0.00957394
CDH11	-0.204252	-0.0179009	-0.0662265	-0.0764933	-0.0523443	0.428219	0.128336	0.0663533	-0.0899868	-0.00744915	-0.0743074	-0.0375352	0.0781774	0.358986	0.0921779	0.0800204	0.408318	-0.107724	-0.0668941	0.610364	-0.0331707	-0.188817	-0.0366516	0.0258102	0.226658	0.00180244	-0.0766439	0.111728	0.163227	0.0151052	-0.150892	0.170639	0.178693	0.107029	-0.176547	-0.128441	-0.250362	0.189332	-0.0130157	-0.0266514	0.108464	0.224349	0.268386	0.0527854	-0.429913	0.131645	-0.065968	0.153018	0.229995
CDH12	0.068059	0.144579	0.083035	-0.0708251	-0.0586271	0.0244203	0.0302463	0.0195913	0.0406132	-0.0739269	-0.0297542	0.0200176	0.0964079	0.00980806	-0.0658598	0.0663247	0.00213194	0.0841527	-0.049511	0.057899	-0.0626907	0.0300398	0.216278	-0.00916719	-0.0384259	0.0592794	-0.0705981	-0.0338678	-0.0525126	-0.0298352	0.383441	-0.0235343	0.0862403	0.135953	-0.010272	-0.00630951	0.0745659	-0.0598216	0.0452561	0.0939617	-0.00437641	-0.0125904	0.0401526	-0.0504956	0.0119839	0.0426183	0.00169897	0.00395155	-0.0476742
CDH13	-0.0578938	0.0957537	-0.0466571	0.0448322	-0.199488	0.00580215	0.0332189	-0.0093255	-0.0200958	-0.327815	-0.105043	-0.0429187	0.105401	0.101399	-0.0307555	-0.0507674	0.148312	0.0378885	0.0691881	-0.0771008	0.0932579	-0.208698	0.340933	-0.0100942	0.169355	0.0813761	-0.202482	0.242107	-0.15077	-0.0626059	0.10479	0.409069	-0.102527	0.0415344	-0.154046	0.128831	0.148847	-0.200898	-0.045907	-0.176975	0.150346	-0.0296216	0.013792	-0.127487	-0.253922	-0.0222836	-0.193852	0.138245	-0.0926828
CDH15	0.081604	0.176569	0.267194	0.163658	-0.138825	0.292202	0.0261173	-0.12529	-0.132098	-0.278101	-0.167348	-0.105656	-0.229068	-0.137443	-0.0142035	-0.134328	0.0349135	-0.0546918	-0.0280743	0.26626	-0.160666	0.28668	0.318243	-0.0957637	0.164027	-0.0175629	0.186695	0.187566	0.281489	0.382806	0.232545	0.0637093	0.283571	0.159192	0.00771666	0.00938559	0.12911	-0.0061698	0.0861554	-0.0429378	0	-0.119965	-0.181576	0.104122	-0.184974	-0.213477	-0.0543642	0.181135	-0.0135646
CDH16	0.0525398	0.249224	0.0228095	0.0874605	-0.00144386	0.247085	-0.0371718	-0.115406	-0.157866	-0.128101	-0.059248	-0.157752	-0.155751	0.014092	-0.0211535	0.134626	-0.0177493	0.0138512	-0.120324	0.0439606	-0.0175529	0.100493	0.169267	0.0411263	0.278898	0.0406537	-0.00499153	-0.14945	0.238944	-0.0695267	0.49659	0.129299	0.0707645	0.148792	-0.0362244	-0.115177	0.099266	0.0387392	0.119484	-1.1e-05	0.000619	-0.0531726	0.161648	-0.015904	-0.106104	-0.342526	0.118978	-0.154709	0.0125909
CDH17	0.0470386	0.347582	-0.0694456	-0.100821	-0.00278902	0.114543	0.119497	-0.0472107	-0.0270047	-0.0530577	0.0385795	-0.0280447	0.0172277	-0.119234	-0.0847306	0.000515	-0.0591974	-0.0806184	0.0718164	0.0359826	-0.16006	0.135591	0.232897	0.172791	0.0808268	-0.0651999	0.080708	0.20946	0.106566	0.222288	0.209579	-0.125269	0.0191345	0.267212	0.0831513	0.0478339	-0.0967407	0.216713	0.0890651	0.0182648	0.021347	0.0454698	0.0576797	-0.0340352	0.0893302	0	-0.0926409	0.0935302	-0.0531449
CDH18	0.113478	0.134222	-0.00961256	-0.00784111	-0.0203676	-0.00400257	-0.0848227	0.0671301	-0.0423465	-0.147173	-0.107929	-0.11954	-0.056716	-0.106488	-0.105556	-0.0322924	-0.0838928	-0.0282149	-0.0191236	0.118241	-0.022666	0.259403	0.0801902	-0.00687599	0.0527239	0.0962253	0.199276	0.0378814	0.276369	0.40902	0.136943	0.00391531	0.044054	0.105402	0.146195	0.0140805	-0.00842667	-0.14933	-0.0312185	0.0222187	-0.0962295	-0.010499	-0.106007	0.0621548	0.0367966	-0.0402513	0.0321035	0.00453758	0.0651751
CDK2	0.0192137	-0.0423489	-0.0199327	-0.0157022	0.23874	-0.482616	-0.0532079	0.0721526	0.038178	-0.157066	0.190381	-0.0886531	0.286292	0.0113125	-0.111141	0.349463	0.0929923	-0.0665479	0.0302229	-0.313107	0.0539231	-0.456411	0.0282221	-0.153231	-0.0462742	0.0230389	-0.228868	-0.208526	-0.263182	-0.231236	-0.41629	-0.0790501	-0.255487	0.0291405	0.101554	0.00915575	-0.0115347	-0.0832224	-0.0266685	0.301259	-0.24924	-0.00399208	-0.0313916	0.0435748	-0.0708265	-0.0399785	-0.0281343	-0.200271	-0.0149288
CDK4	0.0211635	0.0216928	-0.0064683	0.0461864	-0.155714	-0.321164	-0.404765	-0.362882	-0.180027	-0.346361	-0.27635	-0.393738	9.54e-07	0.115056	-0.0948181	0.0160027	0.0689707	-0.053256	-0.10095	0.161083	0.20987	-0.115594	-0.56172	0.0635796	-0.0185342	0.0585985	0.0891719	0.107062	0.0489745	0.0409608	-0.421571	0.0255036	-0.451726	0.0798254	-0.0667677	0.340234	-0.1868	-0.0988674	-0.317574	-0.132023	-0.123736	-0.388112	-0.107244	0.11334	0.080276	0.0968471	0.10944	-0.30662	0.118011
CDK5	-0.00145245	0.187351	0.0514798	0.290771	0.0530992	-0.235302	-0.0468321	0.0573239	-0.173737	0.033556	-0.28002	-0.29931	-0.0871115	-0.0830774	-0.0961952	-0.198037	-0.188221	-0.164216	0.0809913	-0.114023	0.153289	-0.109629	-0.0617294	0.171049	-0.142122	0.0631208	-0.0340762	-0.162609	-0.0383925	-0.14759	-0.356314	-0.0282121	-0.197947	0.166437	0.0414877	0.346737	0.240236	0.0755091	0.0325851	-0.0396948	-0.0698695	-0.215466	0.053153	0.027555	0.112646	0.0607495	0.129971	0.0379806	0.00959301
CDK6	0.224889	-0.41221	-0.299439	-0.00818491	0.218626	-0.370777	0.097239	-0.269268	-0.212483	0.0882788	-0.10735	0.154471	0.125976	-0.167976	-0.10003	0.113998	-0.107692	-0.0325699	-0.0672231	-0.144269	0.424263	-0.333283	-0.0946774	0.112287	0.109122	0.665434	-0.0650744	-0.0496893	-0.27528	0.0755978	-0.256119	-0.15358	-0.0497332	0.0492339	0.16483	-0.0101633	0.282105	0.382164	0.050374	-0.066968	-0.109818	-0.0384736	-0.0421371	0.414206	-0.290479	0.29304	-0.202738	-0.191014	0.415364
CDK7	0.0179458	-0.258588	-0.0404496	0.0778012	0.21942	-0.625749	-0.0392499	0.185326	-0.0295591	0.31443	0.201424	0.253028	-0.174479	-0.303075	0.0166955	-0.456346	-0.239037	-0.28328	0.116102	0.0549097	-0.096703	-0.147991	-0.20672	0.161186	0.0266929	-0.211925	-0.234711	-0.13461	-0.135306	0.0069027	-0.304511	-0.175123	-0.115974	-0.155704	0.0206614	0.134002	0.101202	-0.0440283	0.181335	0.0151672	0.0069027	-0.081964	0.313767	0.134537	-0.0627661	0.0507731	0.297113	-0.0771708	-0.257192
CDK8	0.179393	-0.186688	-0.209466	0.117428	0.131619	-0.105062	-0.14227	0.0635915	-0.00815391	0.291009	0.171855	0.149853	0.532476	0.106816	0.230706	-0.0148897	0.241957	0.54883	0.18751	-0.164014	0.0393839	-0.242768	-0.73194	-0.136841	0.0531592	-0.243847	-0.284429	-0.307605	-0.0812111	-0.488092	-0.582669	-0.231829	-0.418649	0	0.253567	0.11193	0.205915	0.0840707	-0.0006	-0.0995746	-0.0692539	-0.0550008	0.194177	0.062531	-0.17244	-0.162016	-0.0311284	-0.235693	-0.685842
CDK9	-0.110964	-0.316911	-0.0220242	0.16589	-0.0615911	0.113266	-0.143607	-0.179714	-0.0853014	-0.0602026	-0.0152521	-0.178304	0.140208	0.105286	0.298683	0.329955	0.111054	0.190442	0.145686	-0.00748825	0.126629	-0.227326	-0.173609	0.0456743	-0.033556	0.116771	-0.122165	0.047945	-0.00123787	0	-0.436769	-0.104644	-0.139996	-0.250881	-0.0542641	0.0598965	-0.0948248	0.0917978	0.0365581	-0.0701904	-0.0980949	-0.0621586	-0.354089	0.103911	0.226603	0.0710106	-0.00228882	-0.0198221	0.00935078
CDKN1A	-0.0158281	-0.0367947	0.236073	0.136874	-0.284532	0.156166	0.446138	-0.42398	-0.154647	-0.516926	-0.276045	-0.264777	-0.264634	0.366054	0.0672874	0.0735607	-0.628869	-0.1454	0.00759268	-0.0593839	-0.0269642	0.112417	-0.197264	-0.0642428	0.0655732	0.366579	0.289336	-0.0885267	-0.229967	-0.164424	0.0583067	0.16946	0.134334	-0.0164781	0.204117	-0.107146	0.132596	0.012773	-0.217218	-0.210475	0.00661421	-0.340065	-0.204805	-0.148459	0.134152	0.0694208	0.0881538	-0.160938	0.094789
CDKN1B	0.14701	-0.0911298	-0.0835199	0.188989	0.00272751	-0.464583	-0.244382	-0.11186	0.0138664	0.146524	-0.0719261	-0.121799	0.0163145	-0.598327	-0.0412073	-0.401718	-0.437628	-0.225599	0.0732536	-0.12634	0.0688314	-0.096118	-0.298737	0.06598	-0.0150938	-0.0719013	-0.136051	-0.106423	0.0395975	-0.0203743	-0.556592	-0.12026	-0.203583	-0.137632	0.197723	0.116428	0.114693	-0.232148	0.0155115	-0.236099	-0.101773	-0.0599432	0.0510883	0.36388	0.1221	0.304745	0.172531	0.0950575	-0.0347433
CDKN1C	-0.0219941	0.36858	0.0181274	0.114251	-0.296015	0.260898	0.109874	0.0413308	0.19358	-0.305472	0.0554032	-0.106514	-0.0826097	0.151277	0.223924	0.0180707	0.0223613	-0.116704	-0.0288067	-0.166901	-0.245502	-0.019062	0.116527	0	0.0948648	-0.0484667	0.00404835	0.083324	-0.0160756	-0.185793	0.326287	0.172356	0.104684	0.230479	0.257241	0.0507312	-0.15537	-0.137435	-0.0518956	0.00875997	-0.000267	0.0257149	-0.17794	-0.12193	-0.121742	-0.150193	0.014677	-0.033164	0.238586
CDKN2A	-0.0532818	0.249573	-0.0349421	-0.0295935	-0.12444	0.55808	0.109729	0.0788531	-0.109475	-0.256157	-0.0448489	0.00667143	0.0217605	0.346621	0.0331187	0.298017	0.258161	0.242929	-0.0685344	0.0585814	-0.0874896	0.186851	-0.0232892	0.142663	0.039115	0.0251336	-0.109222	-0.0418339	0.216465	-0.185067	-0.033453	0.145408	-0.0993037	-0.0113549	-0.0875688	-0.349232	-0.0902476	0.28014	0.485462	0.162476	0.296264	0.0862465	-0.0600777	0.011632	0.187044	-0.0882087	0.0331635	0.223163	0.0051465
CDKN2B	0.0816102	0.167552	0.0300474	0.159857	-0.290601	0.205231	-0.233213	-0.293826	-0.115946	-0.194121	-0.391606	-0.0806465	-0.139866	0.147821	0.125322	-0.151631	0.0137954	-0.125484	-0.181035	-0.00694609	0.139197	0.350076	0.354334	0.25809	0.0763936	0.0883484	0.298047	0.0470262	0.165739	0.106838	0.720581	0.400588	0.0602193	0.327058	0.176102	0.185153	-0.0711751	-0.138565	-0.0390964	-0.0551591	-0.12114	-0.236431	-0.113506	0.258692	0	-0.0894089	0.133732	0.0154819	0.238512
CDKN2C	-0.12787	0.234756	-0.0541449	0.193313	-0.030405	0.245074	-0.137324	-0.189917	-0.215491	-0.138944	0.0874057	-0.0807199	-0.145158	-0.139011	-0.14227	-0.30756	-0.105806	-0.0914273	0.103153	0.0282774	-0.112653	0.0306659	0.292787	-0.0176554	0.0950174	0.179356	0.0855684	0.228806	0.148368	0.350821	-0.011024	-0.0467248	0.0997562	0.0750017	-0.0764022	0.0699353	-0.120724	-0.148479	-0.0694365	0.0654311	-0.163386	-0.126018	-0.197207	0.121931	0.0605144	-0.0134149	0.018661	0.144766	0.0201845
CDKN2D	-0.0861673	0.286515	-0.175257	0.0674357	-0.331933	-0.152623	-0.232638	-0.145285	0.0274415	-0.29918	-0.334523	-0.191752	-0.366443	-0.018868	0.0313725	0.151707	-0.459695	-0.00431061	-0.260199	0.158185	-0.132396	0.254254	-0.0352111	0.0472484	0.188076	0.100012	0.201744	0.208263	0.341513	0.267341	0.268599	0.131328	0.0680895	0.251927	0.144165	0.0281115	-0.185233	-0.174115	-0.114419	-0.241676	-0.0407558	0.0456243	0.0798006	0.0213623	0.131479	-0.123692	-0.147136	0.124598	0.194683
CDKN3	8.34e-05	0.0370936	0.0382972	-0.0403152	-0.0534868	-0.0836024	-0.0364637	-0.0828724	-0.0286083	-0.0955753	-0.0393429	-0.0835209	0.0194559	-0.0328727	0.0292416	0.0148115	0.0460911	0.0513129	-0.0570993	0.0453773	-0.0161557	0.0295391	0.167189	0.0171266	0.0175633	0.0371661	-0.0200596	0.0316758	0.0468459	0.00436974	0.0516272	0.00317431	-0.0131521	-0.0304198	-0.013906	0.027658	-0.0860677	0.00196123	-0.0226769	-0.0101933	-0.0732417	-0.0362859	0.0267415	-0.0122857	0.0100532	-0.0035162	0.084753	0.122699	0.0111547
CDO1	0.320229	0.276296	0.158688	0.045166	0.109332	-0.076766	0.115325	0.229296	0.020834	0.262947	0.171163	0.287316	-0.105324	-0.299428	-0.0642576	-0.154368	-0.15706	-0.0105	0.123089	0	0.332759	-0.153948	-0.255803	0.0338821	-0.206543	-0.083106	-0.201667	-0.422276	-0.167448	-0.0876741	-0.704133	-0.119373	-0.103573	-0.269628	-0.179947	0.365132	0.0579691	-0.0398293	0.0299339	0.029273	-0.0746183	-0.0817299	0.0324697	0.256891	-0.196692	0.209847	-0.00979424	-0.50701	-0.361691
CDR1	0.0414248	0.0694032	-0.0716448	0	0.0729022	-0.0966692	-0.157012	0.0501862	0.731094	0.171906	0.0519586	0.0832806	-0.113549	0.00417137	0.0345526	0.297577	-0.154448	-0.257096	-0.14476	0.083189	0.148883	-0.0479579	0.0397038	-0.00847053	0.70757	0.437248	-0.0208664	0.187726	1.08921	0.0720167	0.225005	0.0817285	-0.136019	-0.165637	-0.054234	-0.062058	-0.148703	-0.137843	0.166624	-0.071353	0.0887818	0.256889	0.281456	0.0287304	0.0182137	-0.177682	-0.0528541	-0.0498395	0.142618
CDR2	-0.0130968	-0.197522	-0.317082	0.0910592	-0.00757408	-0.233475	0.00752306	-0.136178	-0.110832	-0.0854225	0.0601864	0.110552	-0.29223	-0.264441	-0.256024	-0.0532179	-0.269025	-0.149661	0.00537395	-0.108137	0.0868511	-0.25562	0.0607519	0.13639	-0.0221791	0.0543203	0.124258	0.123159	0.00317383	-0.091342	0.129551	-0.0888553	0	-0.192317	0.151651	0.0539365	-0.0646195	-0.00378227	-0.189697	-0.0915017	-0.304872	-0.108574	0.0859051	0.0390882	0.163589	-0.0530438	-0.0251536	0.0312958	-0.233041
CDS1	0.189216	0.0178132	0.802098	0.0500417	0.0826387	0.424945	-0.0250902	-0.00750589	-0.0199518	-0.0512471	-0.0297379	0.398245	-0.0552511	-0.0602045	-0.172082	-0.129824	-0.232579	0.0577655	0.337122	0.0181923	-0.0395498	0.195513	0.238182	0.2986	-0.0799761	0.500308	0.241818	0.0989089	0.246902	0.22707	0.119799	0.324395	0.510364	0.00545025	-0.0242977	0.207996	-0.0934944	-0.221129	-0.116044	-0.071147	0.122776	-0.0902438	0.0777717	0.0121155	0.0186663	-0.171927	0.203072	0.0394382	-0.0483413
CDSN	-0.212893	0.273342	-0.0836458	0.027452	-0.037087	0.278018	0.127373	0.215877	-0.0427852	-0.0215163	0.115587	0.155668	-0.304992	-0.0642304	0.0893955	0.0262089	-0.06249	-0.0145111	0.0465407	-0.107469	-0.263158	-0.374937	0.086422	-0.236886	0.0805588	-0.0895829	0.00782108	-0.233948	0.221714	0.0842814	-0.105615	-0.185132	-0.149417	0.136656	-0.0896468	-0.160814	0	0.394251	0.214375	0.0710702	0.114942	0.279672	0.229898	-0.0806541	-0.255627	-0.396831	-0.110282	-0.233126	-0.0216427
CD52	-0.152372	0.404123	-0.00844717	0.043407	-0.165263	0.154725	-0.0801377	0.0014143	-0.0472989	0.542402	-0.0147729	0.214396	-0.285236	-0.35988	-0.184486	-0.101002	0.00198507	-0.338604	0.36368	0.111797	-0.1027	0.00953579	0.158467	0.0398827	-0.00121021	0.380682	0.0301313	0.0572014	0.0265899	0.520005	-0.27695	0.210459	0.300789	-0.458393	-0.0735588	-0.0557327	-0.0679693	0.396763	-0.0552425	0.370712	-0.155171	0.543616	0.139499	-0.218388	0.44768	0	0.112171	0.296525	0.100984
CDX1	-0.098309	0.106191	0.037221	-0.0111332	-0.112306	0.0648003	-0.11756	-0.0941825	0.106816	-0.223924	-0.206058	0.0268979	-0.225465	-0.051847	-0.0474401	-0.0783486	-0.14923	-0.0684218	-0.171164	-0.0527115	-0.267957	0.0739412	0.347341	-0.053565	0.175459	-0.084846	0.210336	0.0915222	0.100534	0.0553141	0.198773	0.215056	0.102879	0.333021	0.091857	-0.0158248	-0.115592	-0.232803	0.0618792	0.07056	-0.1051	0.133442	0.027801	0.0632343	-0.0217514	-0.256249	0.0882082	0.061789	0.264002
CDX2	0.0605249	0.141183	-0.0398216	0.0840874	-0.158937	0.310604	0.0587444	0.0514083	0.308662	-0.148955	-0.204614	0.0174642	-0.0821891	0.29473	0.145123	0.230273	0.113584	0.124974	-0.0973406	-0.147959	-0.181841	-0.0622396	0.145045	-0.0866852	-0.196932	-0.177971	0.0303979	0.241347	0.185154	0.195129	0.306973	-0.0481729	0.184804	0.150789	0.221364	0.163168	0.0787625	-0.107488	0.0751867	0.00185823	-0.00848913	0.168749	0.041697	0.0370231	-0.169051	-0.109758	-0.0332422	-0.0934954	0.00541782
CDX4	-0.0605426	0.0558996	0.0136199	0.0570893	-0.0676203	0.145522	-0.149726	-0.0383811	-0.0509324	-0.123127	0.0682774	-0.142474	-0.0810361	0.251681	0.234824	0.0197115	-0.00529718	0.0488949	-0.164308	-0.0608034	-0.0957289	0.193587	0	-0.0351257	0.0054698	-0.0490184	0.0114069	0.157894	0.0922589	0.0787907	0.140358	-0.19716	0.0505948	0.0091939	-0.02808	0.044085	-0.0511036	-0.024929	-0.183306	0.00148201	-0.0119586	-0.0363073	0.0586772	0.0575514	-0.0348711	-0.0922971	-0.0342484	0.089582	0.101321
CLGN	-0.504804	-0.180419	0.21751	1.408	0.65725	-0.729272	-0.285065	-0.0506368	0	0.415886	1.78912	0.0433321	0.584531	-0.283479	-0.593512	0.120074	-0.0153074	-0.505518	0.478074	0.0618753	0.0146217	-0.348929	-0.477395	0.284295	1.13725	-0.431744	-0.0498405	-0.147196	-0.403341	-0.567863	-0.377638	0.022666	-0.0762935	-0.0366192	-0.550564	0.255516	-0.0673318	-0.469651	-0.536272	-0.210321	0.118487	-0.207012	-0.430479	-0.174124	0.439336	-0.56311	1.0309	-0.648384	-0.755352
CEACAM5	-0.0190811	0.297634	0.0223255	-0.126525	0.0480137	0.323021	0.12143	0.0517845	0.217127	-0.0868115	0.0503831	0.0438499	0.0401621	0.0877609	0.00476885	-0.145188	0.0380344	0.0401626	-0.00998163	-0.16014	-0.169021	0.0220909	0.329301	-0.0268245	-0.0633402	-0.0857306	-0.0659533	-0.0126915	-0.00213242	-0.192304	0.372993	-0.0794735	0.047811	0.0862355	-0.0224919	0.0699248	0.0706654	0.0800815	0.0899734	0.12242	0.0581107	0.108409	0.0641069	-0.0109439	-0.0355549	-0.272163	-0.0781336	0.0168481	-0.0761785
CEBPA	0.14939	-0.0167255	-0.425805	0.438514	-0.20523	0.0898924	-0.241216	-0.559979	-0.198317	-0.712289	-0.466304	-0.260028	0.0470161	-0.712522	0.310513	0.535812	0.0636377	0.097064	-0.304259	0.302174	0.214401	-0.05334	0.0825748	0.48171	0.248833	0.793407	0.486317	0.506352	-0.128458	0	0.322038	0.113793	0.17081	0.552402	0.626229	0.084116	-0.804798	0.133995	-0.206512	-0.204782	-0.0220242	-0.637462	-0.516253	0.422844	0.429643	-0.151586	0.22753	0.144442	0.619812
CEBPB	-0.301723	0.422064	-0.116224	-0.300977	0.0828519	0.391856	0.11053	0.0026474	-0.14876	-0.0621552	-0.133429	-0.415101	0.060874	0.860876	0.612804	0.501659	0.343316	0.906297	-0.309726	-0.513964	-0.00563669	-0.279751	-0.283537	0.138662	-0.0513015	-0.309087	-0.146896	-0.316029	-0.0397944	-0.258024	-0.0887566	0.438226	0	0.396326	0.108923	-0.0158505	0.434447	-0.242078	-0.206082	0.21906	0.0812449	0.311977	-0.0657763	0.137968	0.0473738	0.349006	-0.138063	-0.224897	-0.02811
CEBPD	-0.109004	0.818061	0.799931	-0.176174	-0.150883	0.428198	0.348592	0.066031	-0.218344	-0.488644	-0.0340962	-0.156352	-0.465927	0.797355	0.251401	-0.294536	0.114709	0.453562	-0.275441	-0.118483	-0.126251	-0.0417151	-0.0870404	-0.0773664	0.0272961	-0.186758	0.209219	0.18086	0.689829	-0.0263639	0.0157619	0.916225	-0.0311451	0.485125	0.0374117	-0.0860429	0.334226	-0.201784	-0.00869131	0.186214	-0.229848	0.383002	-0.277229	0.107745	-0.0381622	0.987503	-0.202218	-0.506682	0.246748
CEBPE	0.16235	0.284934	-0.0434628	0.20517	-0.245725	0.222497	-0.0738063	0.00652695	-0.0603118	-0.467925	-0.0924511	0	-0.200842	-0.183734	-0.121432	0.048038	-0.222595	-0.194487	-0.107098	0.0296979	0.0980711	0.188499	0.151955	0.235075	0.0797958	0.0721865	0.252179	0.113202	0.480876	0.508473	0.926671	0.0520921	0.038909	0.130218	-0.111404	0.266907	-0.106704	-0.109719	-0.025135	0.03162	-0.212884	0.0234094	-0.424517	0.0690145	-0.123242	-0.461941	0.0273614	0.0945244	0.235298
CEBPG	-0.224772	-0.314634	-0.0757265	0.377994	0.204257	-0.17381	-0.160776	-0.138964	0.177184	0.0879192	0.216297	-0.00653839	-0.307461	-0.308515	-0.0987539	-0.0959592	-0.0794921	0.0384808	0.0191641	0.208747	-0.177252	-0.336338	-0.246655	0	0.112854	-0.137343	-0.00704288	-0.164728	-0.385865	-0.230714	-0.205627	-0.225616	-0.115344	-0.163579	0.36414	-0.160179	-0.147052	0.433347	0.0714903	-0.0271053	0.00505161	-0.174725	-0.0934534	0.148413	0.100604	-0.12364	0.239232	-0.0356631	-0.330068
CEL	0.0373793	0.438718	-0.0128284	0.163213	-0.288379	0.0191436	0.166356	-0.230113	0.165305	-0.324249	-0.110316	-0.00628948	-0.0918212	-0.183948	-0.0771036	-0.020627	-0.0800128	0.184346	-0.159003	0.256602	-0.0779004	-0.0105448	0.433971	-0.0652995	0.0441041	0.161983	0.1282	0.0856185	0.099905	0.0635433	0.029036	0.0589523	0.00478172	0.0631561	0	0.0117674	0.0560632	-0.00628948	-0.212627	0.036665	0.142236	-0.106641	-0.0390739	0.040143	-0.210935	-0.144023	0.045814	0.527436	-0.118927
CELP	-0.126466	0.297968	0.0733895	0.289	0.066577	0.452563	-0.0624008	-0.336382	-0.137339	-0.176645	-0.176239	-0.0718565	0.0859222	0.414067	0.0526519	-0.118092	0.373928	-0.152852	-0.354065	0.00284195	0.0321221	0.345966	0.0664263	0.174164	-0.0230632	0.0174718	0.138045	0.671283	0.341307	0.0700011	0.321497	0.143878	0.120662	0.272226	0.172448	-0.186503	-0.229997	-0.155446	0.178389	-0.0140691	0.113775	-0.257487	-0.147283	0.205945	-0.166934	-0.031579	-0.0766983	0.203866	0
CENPB	-0.0460548	-0.161041	-0.166443	0.155832	-0.0506239	-0.0536046	-0.217623	-0.317142	-0.273451	-0.251887	-0.217989	-0.190018	0.215247	0.0252657	0.215285	0.110183	0.0960264	0.127367	-0.0641088	0.238879	0.0531015	0.184365	0.517473	0.193003	0.00646067	0.202456	0.151224	0.317703	0.130425	0.289309	0.184692	0.265122	0.0390439	0.0207081	-0.101275	0.132128	-0.0463738	0.0634832	-0.108449	-0.0460687	-0.212579	-0.151774	-0.164995	0.0157967	0.171303	-0.0317698	0.238412	-0.226344	0.349946
CENPC	-0.161676	-0.315348	-0.137103	0.025763	0.360904	-0.180373	0.193911	0.101929	0.134241	0.170068	0.431875	0.453307	0.321478	0.123453	-0.377675	-0.182926	-0.157361	0.124217	0.00988007	-0.0970526	0.0182295	0.401619	-0.715117	0.201628	0.603817	-0.229052	-0.523124	0.141426	0	0.276573	0.0958943	0.0229158	0.196696	-0.182565	-0.24158	0.10545	-0.128327	0.0920467	0.0525908	0.0241609	0.176769	0.229462	-0.116943	-0.0101614	-0.127367	0.231663	-0.0124259	0.318202	-0.101203
CENPE	0.00449228	0.0211577	0.0428872	-0.0462742	-0.0524087	-0.0162625	-0.0378284	-0.0555782	0.0181174	-0.0212135	0.0351133	-0.0403666	-0.049644	0.045289	0.123151	-0.0140138	-0.0521693	0.0727963	0.00174713	0.00186729	-0.0630021	-0.0110459	-0.000956	-0.0125251	-0.0378723	0.00142098	0	0.0482345	-0.000668	0.0929298	0.0195041	0.00523806	-0.0350232	0.0278263	-0.0453553	-6.58e-05	-0.035212	-0.0221567	0.00326633	-0.0187497	-0.0541382	0.00513983	-0.0184116	-0.010067	-0.0156569	0.0712328	-0.0142789	0.0437126	-0.0320644
CENPF	0.111199	0.0785108	0.158719	-0.0978746	-0.155951	0.0224252	0.0875282	-0.017818	-0.142047	-0.0338383	-0.0350785	-0.136675	-0.193398	-0.0568914	0.0525045	-0.115972	0.1338	-0.119651	-0.187688	0.0728617	-0.204329	-0.274418	0.171088	0.126913	-0.0372806	0.0228653	0.00805569	-0.158591	0.113934	0.253007	0.00953484	-0.0472045	-0.0948443	0.0511737	0.130383	0.0317431	0.00619316	-0.115264	-0.0885057	-0.0282931	-0.160507	0.0301909	0.0898485	-0.168931	-0.174113	0.0951014	0.0718346	-0.0405083	-0.185929
CES1	0.1101	-0.00146294	-0.696585	-0.0963478	0.144944	-0.0107965	0.0373859	-0.0980034	-0.0896997	-0.113764	0.145112	-0.0131264	0.016017	-0.0692129	0.0261593	0.0486021	0	0.139059	0.0166817	-0.0776281	-0.138274	-0.436754	-0.120767	-0.00575161	-0.0563545	0.117505	0.0279017	0.0257654	-0.261971	0.00273323	-0.225035	-0.261979	-0.267343	0.0491848	0.139409	0.149536	0.112337	0.0871315	0.146376	0.00207996	0.180734	0.0082283	0.0416412	0.128283	-0.0295401	0.0100651	-0.0957441	-0.000278	-0.208607
CETN1	0.0432968	0.0528126	0.11321	-0.0797043	-0.0784731	0.00782251	0.026978	-0.156825	0.0698977	-0.168941	-0.151999	-0.164886	0.0839353	0.123059	0.146624	-0.0651717	-0.0585098	0.42027	-0.180024	0.016613	-0.0588455	0.0481515	0.349873	-0.060554	0.0945854	-0.0611768	0.0321884	0.00228405	0.143026	0.267876	0.154124	0.063942	0.135993	0.225263	-0.0987806	0.136235	0.0368576	-0.00292492	0	-0.0960259	-0.158257	-0.155684	-0.0333076	-0.0591888	0.134002	0.124627	0.0684338	0.349225	0.037405
CETN2	-0.134656	-0.390205	-0.185689	-0.0436168	-0.0232792	-0.414738	0.537416	0.0613923	-0.0079298	0.254824	0.0964622	-0.0249534	-0.270385	-0.323107	-0.354197	0.0199561	0.133856	0.0267024	0.146222	-0.0986452	0.254104	-0.564776	-0.243974	-0.0350695	-0.137819	-0.274533	-0.380602	-0.273273	-0.192846	-0.106197	-0.4443	-0.129975	0.148079	0.135897	-0.220036	0.090035	0.283366	-0.189653	0.0778112	0.277398	0.0726528	0.397889	0.588387	-0.0751877	0.0569143	-0.173726	-0.00503349	-0.0308681	-0.451296
CETN3	0.118213	-0.0855236	0.0894127	0.0555911	0.356071	-0.388652	0.0517707	0.376842	0.0689211	0.434957	0.433607	0.399094	-0.118105	-0.437031	-0.443218	-0.40877	-0.196587	-0.185333	0.355875	-0.112438	-0.151279	0.00393105	-0.205022	0.172674	-0.0497766	-0.218688	-0.122148	-0.341362	-0.128372	-0.0932546	-0.371959	-0.419946	0.258916	-0.10028	0.0737171	0.0995216	0.103088	-0.192236	0.0286574	-0.0450215	0.00141048	-0.00170374	0.221437	0.128843	0.10527	0.0018301	0.00123787	0.0798111	-0.130661
CETP	-0.080091	0.296571	0.146115	0.0470428	0.361895	-0.223204	0.424715	0.494648	0.0837498	0.609074	-0.575512	0.028141	-0.239297	-0.257547	0.178684	0.0448055	0.522217	-0.209137	0.19117	-0.917831	0.073576	0.582035	-0.497266	0.436123	-0.27713	0.0755634	-0.223596	0.250236	-0.332434	-0.0294428	-0.0293598	-0.388814	0.136465	0.411004	-0.0827532	-0.0501962	0.205524	0.104116	0.357238	0.164546	0.730859	0.716999	0.773245	0.0983229	0.549714	0.654591	-0.0997133	-0.489626	0.712121
CFL1	0.133635	0.0775032	0.0731173	0.24089	0.0502358	-0.74822	-0.0764942	-0.062851	-0.337077	-0.129183	-0.193253	-0.331278	0.0803862	0.0396318	0.0544062	0.130207	0.143976	0	0.213833	-0.0358543	0.123438	-0.135606	-0.138112	0.132664	-0.00710773	0.0709991	-0.167468	-0.066885	-0.0270414	-0.0189638	-0.318611	0.0510397	-0.110486	0.147162	-0.0748186	0.174332	0.10843	-0.0585823	-0.150714	-0.00389099	0.147856	-0.194122	-0.20994	-0.0638599	0.0449886	-0.0813541	0.0703936	-0.128674	0.0203838
CFL2	0.026988	-0.158266	0.229534	-0.172379	0.691592	-0.0279808	0.122151	0.359091	0.0528202	0.139372	0.271553	0.101502	0.558709	0.331828	-0.078784	0.0510807	0.0910397	0.223712	0.155766	-0.337313	-0.172704	-0.340816	-0.806624	-0.299101	-0.106105	-0.614183	-0.17597	-0.530623	-0.524447	-0.407333	-1.00003	-0.408277	-0.138828	-0.2533	-0.415131	-0.142379	0.195046	0.138679	0.00340939	0.328623	0.128144	0.440919	0.306843	-0.265221	-0.253945	-0.301338	-0.0496702	-0.208549	-0.93277
CTSC	0.247272	0.104967	0.324178	0.233903	-0.269359	-0.275973	0.173617	-0.110359	-0.340454	0.260005	-0.132431	-0.249021	0.0231872	-0.117742	-0.395409	-0.000983	-0.197019	-0.259345	0.0897093	-0.112932	0.0383182	0.22866	-0.411774	0.0884686	0.016614	-0.307777	-0.323272	0.056684	-0.265444	-0.154702	-0.336748	-0.057673	-0.24087	-0.223104	0.0663619	0.0822391	-0.0437298	-0.0880094	-0.00271463	-0.111301	-0.0279598	-0.016221	-0.161316	0.00581884	0.142779	0.213869	-0.151505	-0.305619	-0.637517
CFTR	0.0833583	-0.191593	-0.406832	-0.153387	0.0874405	-0.0546918	0.282936	-0.10757	-0.322873	0.41687	0.0178599	0.567228	-0.211256	0.37873	-0.12777	0.0413027	-0.122734	-0.0436049	0.279183	0.505977	-0.223419	-0.218279	0.0670996	0.0778847	0.239047	-0.234287	-0.0913801	0.138586	-0.385577	0.377895	-0.123242	0.118082	-0.0583463	-0.434313	-0.264378	-0.39068	0.0264049	0.497052	0.0314059	0.474806	0.169172	-0.168469	0.265362	0.00835562	-0.197687	0.259615	-0.311911	0.114274	0.119716
CGA	0	0.257818	-0.0465879	-0.149482	0.0596538	0.301473	0.290996	0.156389	0.00418901	-0.0318351	-0.0446796	0.124553	-0.0272851	0.00471497	0.0459394	0.0800543	0.187325	-0.0473585	0.0318022	-0.0455246	-0.014524	0.00229168	-0.0771494	-0.0517955	0.155603	0.0490003	-0.250421	0.137357	0.265963	-0.0892878	0.0942898	0.163258	-0.0760164	0.172992	0.00992537	0.050365	-0.0251575	0.237183	-0.0203996	0.0979171	0.0718927	0.184296	-0.015388	0.113289	0.0143414	-0.173438	-0.106766	-0.13053	-0.0317469
CEACAM3	0.0662174	0.2822	0.0629158	0.112255	-0.0410757	0.283437	0.129162	-0.119884	-0.0651135	-0.0968256	0.100837	0.0410914	-0.147717	-0.121658	0.0824823	-0.165173	-0.0305929	-0.159132	0.117874	0.164367	-0.113518	0.224713	0.330213	-0.261156	0.000629	-0.0167899	-0.00902176	-0.0791707	-0.0191712	-0.0141721	0.122451	-0.264664	-0.101544	0.164723	0.0187941	0.102829	0.170211	0.00467157	-0.0989065	0.0352178	-0.0169706	-0.0488672	-0.0790577	-0.260582	-0.159626	-0.317367	0.1613	0.0980477	0.127479
CEACAM7	0.0153832	0.0347433	-0.0833678	0.0450096	0.00840187	-0.115469	0.00508547	-0.165062	0.028491	0.0906377	-0.035625	-0.0541778	-0.0528598	0.211916	0.0451622	-0.333354	-0.192868	-0.0777621	0.00305557	0.140673	0.157698	0.186681	0.593139	0.0737829	0.0896096	-0.0411725	0.348064	0.181349	0.0904999	0.276143	0.414848	-0.00101852	0.160883	0.0346475	0.154212	0.0155411	-0.071795	-0.122562	-0.0454321	-0.0581136	-0.130318	-0.0582042	0.0790892	0.145237	-0.0550613	0.145292	0.293786	0.200073	-0.0175695
CEACAM8	-0.130079	0.276961	-0.398714	-0.151186	0.0700002	0.22032	0.105942	0.00815439	0.0778809	-0.0108819	-0.223234	0.157551	0.151926	0.207887	0.24751	0.195803	0.388439	0.103952	0.039762	0.0433421	-0.152529	-0.45084	0.0301371	-0.0303087	-0.108164	0.23231	-0.201017	0.125047	-0.128164	0.04072	0.173564	-0.143795	-0.200567	-0.0126562	0.0419569	-0.075449	0.232306	0.174314	0.0887842	0.132766	0.440144	0.189665	-0.0065546	-0.124169	-0.0994244	-0.16344	0.0334845	-0.0642748	0.0244145
CEACAM4	-0.106281	0.270231	0.102434	-0.0141993	-0.163365	0.196459	0.0245872	0.00419474	-0.0028758	-0.208	-0.0762153	-0.120502	-0.04179	0.152633	0.114522	-0.066246	0.00542259	0.211301	-0.0553026	-0.000601	-0.131526	-0.0819654	0.233061	0.0240259	-0.132497	-0.0295911	-0.166056	-0.0885072	0.130292	0.0267243	0.139493	0.0116105	-0.0532074	0.132594	-0.130092	0.0575371	0.0295806	-0.136858	-0.0725317	-0.0236816	-0.156937	0.0110846	-0.126908	0.0632687	-0.288652	-0.0824079	0.0733228	0.118629	0.0198178
CHAD	-0.0965824	0.263987	-0.647211	0.104029	-0.217806	-0.0485063	-0.315759	-0.252007	-0.44976	-0.382306	0.0452871	-0.687238	1.03659	0.946281	0.636321	0.524806	0.499837	0.842297	-0.0228329	0.22016	0.77736	0.235151	-0.00630665	-0.19171	0.25234	0.215212	0.424899	-0.330255	0.0315866	0.153323	-0.162298	0.1145	-0.0766869	0.0784354	0.376524	0.238778	-0.394629	-0.130782	0	-0.241578	0.109445	-0.048717	-0.312115	0.0836358	0.434371	0.0985513	0.229086	0.506022	0.225565
RCBTB2	-0.122985	-0.214231	0.0757246	-0.124268	0.230954	-0.283416	0.211363	0.281077	0.143424	0.485686	0.142454	0.310583	0.0655208	-0.204266	0.223684	0.0218792	0.11147	0.0173635	0.233584	-0.144697	0.217702	0.27743	-0.356288	0.0493059	-0.0760226	-0.131047	-0.312065	0.11363	0.0833077	0.157719	-0.108886	-0.267234	-0.257488	-0.416963	-0.238188	0	0.264034	0.337998	0.146743	0.104014	0.257596	0.0935121	0.155204	-0.131782	-0.0523238	0.0522437	-0.210146	-0.0969272	-0.0900679
CHAT	-0.152241	-0.0400562	-0.02174	0.01296	-0.0812712	0.197555	0.176513	-0.162665	0.00783682	-0.266712	-0.00645208	-0.061831	0.059288	-0.10547	0.182998	0.149241	0.197544	-0.00192881	0.152991	-0.0852919	-0.158558	0.112478	0.072093	-0.0721321	-0.0171638	-0.275399	0.0196276	0.178483	0.252682	0.55078	0.166443	-0.0462604	0.0535731	-0.0132585	0.0264277	0.0795488	0.00453329	-0.0112963	0.139389	0.0195642	0.0206695	0.0765848	-0.0393577	0.0400157	-0.0364718	-0.170435	0.0622349	-0.0920758	0.11523
RCC1	-0.0232191	0.0758519	-0.242481	-0.105881	0.0902944	-0.186321	-0.0862165	-0.13262	0.0580525	-0.292856	-0.163015	-0.252997	0.0997443	-0.298432	-0.0822682	0.152254	-0.334589	-0.032588	-0.00171089	-0.227852	0.00124788	-0.0570874	-0.198302	0.175521	0.19924	0.0824747	0.0820351	-0.133011	-0.042191	0.0238113	0.0786161	0.00721884	-0.1406	-0.128865	0.111289	0.1238	0.0902839	0.148441	-0.0911536	0.0399232	-0.0352139	-0.154502	-0.0249529	-0.175281	-0.119195	-0.100293	0.0744443	0.195936	0.110673
CHD1	-0.231675	-0.429011	-0.0257368	-0.161786	0.351627	0.006073	0.372792	0.236284	0.205358	0.663689	0.514921	0.473104	0	-0.0406203	-0.157778	-0.401992	-0.168028	-0.256672	0.269095	-0.0423875	0.0509253	0.0246382	-0.206739	-0.0215592	-0.0510678	-0.145314	-0.28652	-0.046793	-0.167048	-0.388516	-0.482716	-0.195518	-0.0562501	-0.259682	-0.0344133	-0.158917	0.219826	0.439139	0.220433	0.0717964	-0.011272	0.266547	0.270607	-0.146978	0.194853	0.0486298	-0.0482903	-0.0714941	-0.375098
CHD2	0.118027	-0.27851	-0.00420284	-0.31504	0.23657	0.00259113	0.180871	0.168026	0.173813	0.449698	0.501811	0.47985	0.0750847	-0.222725	-0.385749	-0.447498	-0.145928	-0.118152	0.102361	0.00841141	0.0075283	0.00135803	0.0177298	-0.0476046	0	0.202503	-0.136021	-0.215988	0.229435	-0.011096	-0.359731	-0.235492	-0.128523	-0.289464	0.0647707	-0.501609	0.273749	0.255827	0.219664	0.201751	0.14871	0.0637503	0.167587	0.0483227	0.0123901	0.140181	-0.0648956	-0.0180149	-0.00233269
CHD3	-0.0113373	0.204869	0.0426145	-0.118191	-0.166135	-0.110357	-0.133922	-0.223784	-0.0478616	-0.146391	-0.17837	0.0947433	0.157809	0.0517626	0.112511	0.167621	-0.109679	-0.133451	-0.0472641	0.246556	0.0508709	-0.135595	-0.0914378	0.0344019	0.267743	0.187271	0.0716019	0.245949	0.146736	0.120494	0.187723	0.105275	0.048892	0.0852275	-0.0970411	0.0519338	-0.218793	-0.0269117	-0.109097	-0.144324	-0.00835085	-0.0242639	0.00645018	-0.151623	-0.162428	0.173028	-0.141501	0.12721	0.219625
CHD4	-0.196264	-0.132924	-0.147453	-0.0793133	0.0164318	-0.000329	-0.204881	0.011879	-0.109972	0.345953	0.102945	0.110246	-0.0820732	-0.244195	-0.0205288	0.0866976	-0.0368872	-0.198384	0.19722	0.144798	0.12568	-0.251474	-0.210766	0.027791	0.0370426	0.184588	-0.258187	0.0351534	0.0119543	-0.0618258	-0.272665	-0.079443	-0.198082	0.0581694	0.0443897	-0.246335	0.0543098	0.26258	0.0727348	-0.0222721	0.0442142	0.106105	0.0784349	-0.102897	0.0947123	0.137854	-0.242097	-0.14605	0.275305
AKR1C4	0.365211	-0.00758457	-0.407221	-0.0482645	0.662738	0.159577	0.647384	0.545623	0.128026	0.734782	0.306156	0.273472	-0.106465	-0.286002	0.125286	0	-0.334013	-0.00772953	0.306652	-0.565976	0.171168	-0.675936	-1.15607	-0.43402	-0.395932	-0.161786	-0.587618	-0.358266	-0.8696	-0.44983	-1.11866	-0.00628567	-0.320171	-0.248388	0.0336275	-0.102827	0.373558	0.381556	0.48557	0.196246	0.376911	0.0896492	0.374536	-0.141871	-0.580886	0.0642443	-0.194095	-0.723344	-0.654682
CHEK1	-0.0485396	0.0288119	-0.255597	0.00919914	0.0289245	-0.0436769	-0.0971718	-0.273384	-0.224018	-0.0657406	0.212746	-0.0552139	0.0210114	-0.0685668	-0.282506	-0.0269551	-0.285282	-0.105883	0.262731	0.0284448	0.0467167	0.0786853	0.296323	-0.0380378	-0.201691	0.0817151	-0.00597382	0.0260715	0.0924654	0.261659	0.19864	0.15249	0.126414	0.0416079	-0.252516	0.228281	-0.0830908	-0.26276	-0.100626	0.0516148	-0.119176	0.0515528	-0.0704508	-0.0262961	-0.0236344	-0.0883708	0.193634	0.170114	-0.01056
FOXN3	0.0833206	0.257995	-0.0909629	-0.115716	0.149234	0.586317	0.172023	-0.0687461	0.0628872	0.0363541	-0.0330772	0.194453	0.0942745	0.226639	0.0667067	0.16726	0.116789	0.0987415	-0.0671706	-0.30584	-0.122749	-0.296825	-0.36559	0.00568962	0.137445	0.169526	0.109803	-0.0591588	0.232422	-0.283841	-0.403118	-0.0201302	-0.203023	0.169448	0.27254	-0.283168	0.00996876	0.175717	0.201744	0.0212364	0.160662	-0.169755	0.148388	0.185082	-0.065764	0.224829	-0.354926	0.0312729	-0.015027
CHGA	-0.0921326	0.282521	0.12248	-0.255484	0.0918994	0.406367	-1.43e-06	0.0554624	0.0677524	-0.18222	-0.0392652	-0.0108171	-0.0731854	0.0571265	0.232047	-0.0682607	0.0254507	0.127327	-0.0171266	0.0155301	-0.179886	-0.191339	0.473603	-0.0919948	-0.118584	0.15213	0.0880599	-0.00210571	0.0152564	-0.258434	0.135092	0.0199394	0.132779	0.113638	-0.194579	-0.073741	0.038866	0.0598402	0.0535517	0.117548	0.0239587	0.0277214	-0.0975127	-0.167992	-0.352854	-0.0441732	0.113135	0.158635	0.0223336
CHGB	0.158499	-0.0451698	0.166381	0.0163026	0.0692668	0.135794	0.148433	-0.0309572	0.107393	0.00572252	-0.19152	-0.0949531	-0.17846	-0.112203	-0.10316	0.0181036	0.00229025	0.0832162	-0.0681458	0.0484142	-0.113357	-0.0669541	0.0366378	-0.00380182	0.134828	0.0627699	0.00572252	0.0788574	0.231038	-0.0361857	0.112189	0.0613651	0.11033	0.0835915	-0.20094	-0.0128903	0.00677586	-0.0212817	0.0509434	-0.124305	-0.0901856	0.121023	0.0670433	0.0511718	-0.244272	-0.118973	-0.136879	0.00966024	-0.0451698
CHI3L1	-0.3753	-0.163475	0.0410295	-0.31746	0.601943	-0.283091	1.327	0.0152669	-0.668003	0.416639	-0.00804567	-0.81342	-0.112444	-0.279405	-0.165018	0.83833	-0.604087	-0.212654	-0.562001	-0.0441899	-0.56597	-0.104086	-0.254523	-0.671894	-0.362298	-0.350402	-0.133834	0.118558	-0.277888	-0.316928	0.506644	-0.218927	0.500729	0.300835	2.5119	0.26519	0.491452	-0.242819	-0.264783	-0.337231	0.64621	0.586468	0.0651731	-0.0116954	1.52899	-0.356511	0.41011	-0.200386	-0.398934
CHI3L2	0.0147896	0.0430732	-0.0710673	0.189106	-0.00137949	0.0480633	-0.0936809	0.037014	0.00737286	-0.0803084	0.0271225	0.129716	0.0772719	-0.00729275	0.0479598	0.207649	0.0285864	-0.00763464	-0.0290585	0.0433121	-0.14687	0.103833	0.130095	-0.101242	0.03127	0.200423	0.0602756	-0.0761223	0.106824	0.381462	0.228181	-0.0411391	-0.00729275	0.0736957	-0.0111194	0.108467	-0.0114293	0.0794673	0.106596	0.0199513	0.00723886	-0.117235	0.0263152	-0.0496802	-0.100895	-0.128109	0.0416284	0.0439658	-0.10459
CHIT1	-0.162388	0.0225029	-0.0374765	0.0618172	0.0528083	0.065876	0.0729003	-0.110526	0.293942	-0.257656	-0.0115299	0.00354719	-0.180728	-0.115742	-0.143105	0.0552778	-0.0115299	0.120243	-0.0110588	-0.0803285	-0.227438	0.019865	0.0237737	-0.199517	-0.146414	-0.300829	-0.0115299	0.0720558	0.00391054	0.182506	0.243398	-0.0447598	0.11633	0.0510979	-0.0406756	-0.00421333	-0.0592947	0.0615182	0.229867	-0.180294	0.128047	-0.0266323	-0.0250235	-0.143883	-0.240513	-0.302661	-0.108186	0.0233607	0.0994077
CHKA	0.113558	-0.114501	0.151158	-0.455833	0.479217	0.0122747	0.405396	-0.180018	-0.0607834	0.150089	0.183107	0.256069	0.00552177	0.108418	0	0.498371	0.323368	-0.00571299	-0.0228844	0.0159683	-0.0607557	-0.12664	-0.169741	0.163352	0.114782	-0.164615	-0.561088	-0.407603	-0.131372	-0.369821	-0.0022583	-0.301715	-0.358508	-0.221325	-0.00629997	-0.582452	-0.16404	0.412806	0.168858	0.209517	-0.145041	0.227672	-0.196005	-0.204032	0.301533	-0.259868	-0.0977154	0.0709162	-0.170106
CHM	-0.0986195	-0.0205731	0.0095911	-0.299554	0.291122	-0.0774102	0.249898	0.102113	0.0578146	0.490035	0.281589	0.159283	0.200556	-0.0172896	-0.222359	-0.0933156	0.0641966	0.0227823	0.321045	-0.15834	0.0300379	-0.197603	-0.325045	-0.0571594	-0.0793424	-0.125054	-0.177364	-0.0886564	-0.0459752	0	-0.332941	-0.162763	-0.0221858	-0.241565	-0.132743	-0.00816488	0.253635	0.183531	0.0299535	0.13166	0.110275	0.244166	0.220299	-0.120869	-0.0665855	0.0370712	0.0692477	0.192316	-0.380745
CHML	0.179253	-0.272976	0.101502	-0.0818748	0.206387	-0.289655	-0.0533443	-0.202861	0.107279	0.13205	0.0575991	0.110065	0.342454	0.240209	-0.210807	-0.0677056	-0.0998044	0.0446782	-0.0489802	0.172215	0.011364	-0.173139	-0.0229301	0.00688171	0.285009	-0.118047	-0.10076	-0.171029	-0.218814	-0.296338	0.0504556	-0.422924	-0.205698	0.00896931	-0.229563	-0.188806	-0.0489717	0.170103	0.189258	-0.169937	0.24789	-0.0130067	0.377662	-0.0256228	-0.145592	-0.194949	-0.0090332	0.0747671	-0.60967
CHN1	-0.114784	0.0208797	-0.0945458	-0.109632	0.10386	0.0872173	0.00344801	-0.0269942	-0.169443	0.248116	0.0476532	-0.0376806	-0.0933576	0.183242	-0.142033	-0.129759	-0.123177	-0.0403352	-0.193252	0	0.0578709	0.0135293	-0.181622	-0.0764079	-0.131274	-0.120861	0.0014348	-0.0692549	0.11665	-0.0200367	0.0276337	0.0131655	-0.0671544	-0.0849319	0.0432301	0.126453	-0.0444403	0.165471	-0.182763	-0.0670443	-0.0300517	-0.0492525	0.0406747	-0.0326614	0.0535154	0.0775795	0.22998	0.145716	0.0972257
CHN2	0.304816	0.0459814	-0.00333023	0.167662	0.161888	-0.208266	-0.0909867	-0.133036	-0.182275	-0.299456	0.018384	0.148206	0.292352	0.0797195	0.0113649	0.188546	0.22181	0.256844	0.0307341	-0.303173	0.0733795	-0.299238	-0.390548	-0.0655022	-0.0916853	0.245	0.0521908	-0.203994	-0.107839	-0.262431	-0.592559	-0.195062	-0.108657	0.0506744	0.372058	0.0399094	-0.162328	-0.0441256	-0.115597	-0.080318	-0.58385	-0.239701	-0.166515	-0.155245	-0.0724821	0.0383902	-0.172775	-0.139294	-0.0727778
CHRM1	0.056622	0.0530286	0.00322294	0.109371	0.0344658	0.328825	-0.275215	-0.052968	-0.048769	-0.462034	-0.0287623	-0.0533414	-0.177646	-0.0604348	-0.188021	-0.111065	-0.103146	0.282683	-0.194265	-0.00153542	-0.0580788	0.401186	0.677745	-0.0260382	0	0.105782	0.16748	0.3977	0.339119	0.35887	0.112519	0.273743	0.399597	0.0578604	-0.188245	0.0718055	-0.196417	-0.181461	-0.0610366	-0.0271535	0.0655565	-0.0467305	0.034862	-0.101323	-0.0707579	-0.151611	0.0184984	0.39825	0.17522
CHRM2	-0.249822	0.000822	0.0308576	0.0307698	0.0427032	-0.095921	-0.0945997	-0.0308142	0.106327	-0.200114	-0.0535092	-0.00522613	0.038094	0.159891	-0.0783896	-0.01579	0.0602498	0.252411	-0.0456338	-0.1587	-0.0434246	-0.0610003	0.073091	0.00798893	0.00680208	-0.0653191	0.0137277	-0.102208	0.0581546	0.048523	-0.0531516	-0.0998907	-0.0164371	-0.0385733	-0.130285	-0.0998349	-0.124314	0.0811143	-0.026485	0.126347	0.0324535	-0.159669	0	-0.152768	-0.0971489	0.101057	-0.0487137	0.112446	-0.0577016
LYST	-0.129439	-0.101289	0.089396	-0.290164	0.0917053	0.145323	0.210619	0.182468	0.138225	0.528272	0.301129	0.362516	0.213914	-0.0919504	-0.0865684	-0.178735	-0.134138	0.0757351	0.0860138	0.0361962	0.0542359	0.0553894	-0.120099	0.106936	-0.162833	-0.132264	-0.125303	-0.360068	-0.174856	-0.26976	-0.300197	-0.0506501	0.0824533	-0.190225	-0.0913243	-0.300659	0.222639	0.279839	0.115918	0.0813589	0.182406	0.168654	0.0741911	0	-0.0571623	0.134093	-0.0919528	-0.0270681	-0.242846
CHRM3	-0.0977163	0.0958676	0.142907	0.152569	-0.0698986	-0.0468411	0.293084	-0.214827	-0.129216	0.27523	-0.0691647	0.0674658	-0.311431	-0.0362306	0.127762	0.140727	0.2366	0.0322909	-0.195364	0.232192	-0.00651884	-0.0116048	0.376582	0.164232	0.0728373	-0.274989	0.0939465	0.522203	0.15781	0.0203104	0.419095	0.35295	0.299137	0.140045	-0.165006	-0.0151482	-0.158053	-0.145832	0.46549	-0.0813184	1.15895	0.157755	0.512267	0.180848	0.154428	0.222523	0.0155301	-0.145265	0.0962043
CHRM4	0.102355	0.254082	-0.0435915	-0.374318	0.0289602	0.3258	0.0852976	0.0047822	0.239307	-0.198889	-0.366138	-0.109901	0.165469	-0.31986	0.205737	0.195785	-0.146139	-0.366676	-0.0307899	-0.0696859	-0.0322986	0.15678	0.601506	-0.0825777	-0.00586271	-0.0284796	0.156714	0.399596	0.164481	0.130474	0.288372	-0.0279183	0	-0.109201	-0.124611	0.107393	0.0790582	-0.0903254	0.0431237	-0.0903659	0.158448	0.328089	0.152152	0.0611024	0.116686	0.0262856	0.111709	0.0890984	-0.170585
CHRM5	0.145043	-0.00276375	0.129769	-0.2011	0.00842667	0.133193	-0.193976	-0.0306821	0.252246	0.130216	0.0221796	-0.0356131	0.0881772	-0.202792	0.0216026	0.231078	-0.0195341	0.138707	-0.0117054	-0.112181	-0.207719	0.30951	0.527395	0.0196838	-0.0224967	0.167919	-0.023406	0.00273132	-0.14247	0.163754	0.150953	-0.138024	-0.111909	-0.107984	-0.0497594	-0.207204	0.0427365	-0.0288067	-0.0449619	0.0484142	0.0677814	0.05269	0.2404	-0.0277443	-0.0959959	-0.309789	-0.0905333	0.0118489	0.170333
CHRNA1	-0.106458	0.00444412	-0.282162	-0.0568805	0.0534263	0.0874009	0.0268364	0.026556	0.0150757	-0.0294471	0.0273581	-0.00431347	0.147619	0.220746	0.146971	0.120953	-0.145787	0.0921621	-0.0625505	0.0230131	-0.121871	0.0231862	0.145551	0.0699496	0.0331182	-0.0528679	-0.0377412	-0.107786	-0.0321627	0.0743184	0.263204	-0.103267	-0.141902	-0.00431347	0.0278401	-0.188653	0.083169	0.0635123	0.00309563	-0.11654	0.12124	0.0563149	-0.111183	-0.143542	-0.0322418	-0.141063	0.0471816	-0.130558	-0.00431347
CHRNA2	0.0758562	0.0484357	-0.0691896	-0.239501	-0.0867653	0.119289	-0.1156	-0.165832	-0.0096302	-0.198107	0.047195	-0.0431428	-0.275777	-0.0391741	0.288327	-0.138708	-0.026588	-0.125629	-0.00838852	-0.054985	-0.05655	0.0590224	0.102625	-0.0878029	-0.0772214	0.0857916	0.203577	0.0983815	0.124035	0.166451	0.210523	0.0604773	-0.321046	0.0675378	-0.153101	-0.33153	0.0101609	-0.102846	0.244173	0.0382295	-0.036375	0.153223	-0.00868702	-0.245347	-0.12664	-0.165865	-0.192391	0.0915785	-0.0230083
CHRNA3	0.051775	0.104453	-0.045917	-0.00619221	0.0622959	0.130717	0.0205698	0.00706291	0.221937	-0.121007	0.0139585	0.102375	0.0963559	0.0141902	-0.0635657	0.128174	0.00649357	0.127865	-0.133672	-0.198428	-0.172671	0.0729446	0.250827	0.0871367	0.0300436	0	-0.0259962	0.06848	0.0305614	0.0921083	0.283258	0.00703716	-0.00653887	0.0920959	0.0627384	-0.0854378	-0.0297041	0.0160532	0.0869746	0.165864	-0.0487213	0.29317	0.057858	-0.00677395	-0.196268	-0.119347	-0.152365	0.1495	0.0872207
CHRNA4	0.898864	-0.488563	0.66533	1.05316	-0.086514	-0.828665	-0.0849719	-0.476102	0.272714	0.18718	-0.513627	-0.18333	0.0470233	-0.558361	1.50061	0.358564	1.05921	-0.343072	0.419572	0.270304	1.19178	0.44507	0.316354	0.330638	0.652795	1.7575	0.738058	0.274244	0.713875	0.522177	1.31136	-0.605271	0.488805	-0.814302	-0.252244	0.651668	-0.506358	0.246203	-0.294515	-1.41409	-0.0122523	0.0843339	-0.376596	0.298799	-0.737658	-0.0614171	0.697577	-0.576632	1.04379
CHRNA5	-0.134859	0.10441	0.0289598	0.0635943	0.0504007	0.162555	-0.178415	-0.0860248	-0.250834	-0.14701	-0.0980148	-0.118514	0.0834751	0.0209646	-0.00354481	0.104231	0.119424	-0.0334158	-0.175386	0.0992274	0.136409	0.0271287	0.159096	0.0695558	0.164817	0.0133352	0.195614	0.0627317	0.0398107	-0.0336781	0.062079	-0.120308	0.107379	0.0437465	0.083396	0.0330787	-0.0413194	-0.162574	-0.0911784	-0.16683	-0.0478973	0.050427	-0.222126	0.263922	-0.0154276	0.0611844	0.0384822	-0.0742145	0.188468
CHRNA7	-0.254517	-0.145967	0.0360136	0.805011	0	0.158757	0.146234	-0.223703	0.253671	-0.121782	-0.230481	-0.110616	-0.187651	-0.325336	0.193845	0.0522957	-0.12781	-0.274036	-0.0873899	-0.037498	-0.308277	0.140926	0.146282	-0.0157485	-0.0193272	0.0563383	0.501101	0.168882	0.217552	0.170087	0.395602	-0.254694	0.230639	0.116921	-0.163234	0.0075717	0.052866	-0.227398	0.0749793	-0.125526	-0.272215	0.354838	0.197463	0.0317068	-0.0917373	0.200562	0.0358767	0.277078	-0.0838423
CHRNB1	0.211133	0.00727558	-0.356917	0.181131	0.0658674	-0.236881	0.228681	-0.028399	-0.197358	-0.146058	-0.236241	0.155551	0.294285	-0.0326662	0.408603	0.425272	0.00667763	0.0439463	-0.084188	0.00987196	0.198257	-0.302824	-0.146212	0.4077	-0.0888009	0.1319	-0.0854178	0.371021	0.0936322	0.274846	0.120063	-0.0120683	0.0237722	0.0485716	-0.117476	0.0527983	-0.166907	0.384161	0.148978	0.229618	-0.0667438	0.130222	-0.217021	0.0108156	0.0531931	-0.072413	0.071095	0.21693	0.194198
CHRNB2	0.0417595	0.0936861	-0.0192933	0.0484271	-0.00149965	0.340236	-0.174117	0.062057	0.373159	-0.142501	0.0217094	-0.0806747	0.0138206	-0.0821147	0.0304027	0.213454	0.0121856	0.168699	0.138149	-0.0228558	0.0357471	-0.0166121	0.0658751	-0.0713491	-0.0767798	-0.189324	0.227493	0.0572658	-0.0275455	0.088243	0.495958	-0.104658	0.0997438	-0.0678701	-0.0405416	0.0556684	-0.0636387	-0.0397229	0.120837	-0.0765176	-0.0295215	-0.158309	-0.0506239	-0.130821	-0.314294	-0.0564547	-0.193531	0.0386686	0.174536
CHRNB3	-0.00302172	0.172227	-0.074091	-0.0609193	-0.0333047	0.121689	-0.067852	-0.0422006	0.187824	0.0399437	-0.0624905	0.048605	0.0459485	0	-0.0983729	0.198827	-0.0264931	0.140452	-0.0634103	0.042078	-0.0535769	-0.0104384	-0.0575886	0.0849352	0.114551	-0.026011	-0.0864224	0.156356	0.0414734	0.124314	0.0439997	-0.0719485	0.0543461	0.0952449	-0.0225358	0.06146	0.0036521	0.0213709	0.124082	0.0241103	0.0552487	0.104868	0.0036521	-0.0986061	0.0036521	-0.101443	0.0368752	0.0938559	-0.0153432
CHRNB4	-0.0226226	0.112861	0.384363	0.210408	-0.22375	0.166441	0.0985627	-0.136398	0.169801	-0.26671	0.174945	0.204168	-0.228596	-0.184564	-0.187314	0.0480099	-0.225185	0.294324	-0.0615668	-0.107958	-0.00866985	-0.193795	0.102183	-0.0753627	0.131709	-0.0578971	0.11486	-0.0184927	0.185199	-0.0735083	0.0975065	0.159507	0.387755	-0.0223813	-0.0248761	0.11654	0.044395	0.0477595	0.0429502	-0.054204	-0.253255	0.0519381	-0.103351	0.337152	0	-0.0677252	0.123756	-0.185215	0.0655227
CHRND	0.144617	0.0542274	-0.111461	0.0327926	-0.0749836	0.116869	-0.0147557	-0.201694	-0.113329	-0.184487	0.0426888	-0.171845	0.0330162	-0.169204	0.196513	0.0911412	-0.0732665	0.219207	-0.0333819	0.0671101	-0.0687666	0.165121	0.538441	0.0690145	-0.0477448	0.244435	0.204441	0.25628	0.239808	0.307715	0.22516	0.166278	0.287114	0.0357084	0.116817	0.287115	0.0287747	-0.0120969	-0.017849	-0.0584722	-0.0366707	0.0228066	-0.00636435	0.203194	0.03795	-0.0738521	0.0186996	0.197319	0.130534
CHRNE	-0.042438	0.356574	-0.324648	-0.0889936	-0.0154109	0.272671	0.0993452	-0.0314517	0.351193	-0.132646	-0.0893559	0.0346313	0	0.0588813	-0.0430331	0.345571	0.082993	-0.126679	0.118445	0.121501	0.15861	0.0166106	0.123297	-0.117953	0.0580029	-0.0401669	0.019877	0.0566978	0.034647	0.162985	-0.0260105	-0.0101104	0.164986	0.168929	0.214363	-0.10745	-0.117136	-0.14635	-0.0688248	0.103223	-0.0995374	0.0914459	-0.0234323	0.166406	-0.0353465	-0.183058	-0.203643	-0.0635891	0.122646
CHRNG	-0.00933599	0.0335002	-0.104348	-0.0259175	-0.141094	0.231423	-0.0450282	-0.0197434	0.100276	-0.151722	-0.164024	-0.149769	-0.106832	-0.0627108	0.167653	0.141964	0.0309324	0.325341	-0.128305	-0.0301986	-0.26764	0.164962	0.185911	0.112901	-0.0928059	-0.0231771	0.0884404	0.270736	0.273342	0.259999	0.292559	-0.0313673	0.0302105	-0.146041	0.00485849	0.0658865	-0.0147333	0.159173	-0.116596	0.112263	0.110724	0.169199	-0.226067	0.195688	-0.058979	-0.19001	0	0.0341887	0.0365257
CHUK	0.00878239	-0.294498	0.0510354	0.275209	0.419344	-0.675577	0.103615	-0.00485134	-0.212913	0.443463	0.225666	0.231225	-0.076623	-0.287412	-0.141567	-0.103368	0.124066	-0.165183	0.249749	-0.102078	0.168465	-0.0824189	-0.646362	-0.0909476	-0.111337	-0.442394	-0.198901	-0.322318	-0.750489	-0.477376	-0.961708	-0.312667	-0.192988	-0.349699	-0.278165	0.240868	0.19393	0.0178828	-0.222277	0.0280328	-0.0587416	-0.085463	0.143139	-0.183318	0.329575	-0.027195	0.108441	-0.179665	-0.665915
CIDEA	-0.0109053	0.212291	0.0112448	0.123019	-0.128679	0.322858	0.00324726	-0.182005	0.0330806	-0.247039	-0.0499167	-0.14679	-0.238672	0.184814	0.279243	0.139732	0.0482359	-0.185978	-0.0904217	0.113198	-0.0728474	-0.0656276	-0.0315499	-0.173983	-0.0622334	-0.196479	-0.0145874	0.104681	-0.0547471	0.260795	0.512566	-0.0879407	0.0314436	0.269497	0.15379	0.0799375	-0.0648608	0.0678539	0.136199	-0.106526	0.0657473	0.167077	-0.156599	0.0570641	-0.0482554	-0.166578	-0.071569	0.0385647	-0.102694
CKB	0.0152488	0.00707293	-0.191059	0.0574298	-0.156523	0.0255122	-0.174661	-0.179012	-0.173336	-0.27043	-0.252784	-0.363671	-0.0255408	0.52281	0.249542	0.105633	0.00589561	-0.057941	-0.310698	0.198655	-0.119371	0.00215054	0.159482	0.258329	0.0794396	0.0279074	0.248321	-0.00833702	0.199971	0.157207	0.201692	-0.0504293	-0.00410128	0.185512	0.513158	0.0673146	-0.127364	-0.0923958	-0.212736	-0.370776	-0.0233598	-0.198403	-0.302656	0.0652099	-0.00691843	-0.0133004	0.0360937	-0.0038476	0.191465
CIRBP	-0.353602	-0.244694	-0.311276	-0.358546	0.154285	-0.724761	-0.00732136	-0.243825	0.0460272	0.286448	0.366227	0.278183	0.0355501	-0.134389	0.056242	-0.175447	0.0942411	-0.173128	0.137161	-0.00402832	0.38275	-0.0891514	-0.268077	0.115881	0.279689	0.0570288	-0.200658	0.126788	0.222495	0.144012	-0.0837946	-0.391902	-0.649393	-0.506499	-0.196168	-0.419064	0.134168	0.309467	0.245407	0.153829	0.357297	-0.00578308	0.354856	-0.0597353	0.462564	0.0571041	-0.211947	0.123205	-0.110387
CISH	0.0752621	0.211836	-0.20488	0.178303	-0.349334	-0.235547	-0.0790119	-0.141571	-0.333089	-0.414233	-0.314786	-0.408821	-0.0707479	-0.421222	0.0433178	-0.0828466	0.194531	-0.422675	-0.195615	-0.00856304	1.09429	0.0194893	0.555147	-0.110232	-0.151157	-0.144935	0.362545	-0.187245	-0.319975	0.11034	0.176629	-0.172902	0.682228	0.251152	-0.000852	1.40887	0.686089	-0.0177059	-0.111539	-0.414348	-0.0460682	0.166491	-0.0152726	-0.0638699	0.045897	-0.284523	-0.331329	0	0.224228
TBCB	-0.089334	0.0582933	-0.0427423	0.0117087	0.00419712	-0.316174	0.0105243	0.0220432	-0.120417	0.0524363	-0.0517859	-0.236804	-0.153008	-0.177341	0.091269	0.00121498	-0.156122	-0.254964	0.0957875	0.0653248	0.288207	-0.131202	-0.373981	-0.0294304	-0.244852	0.13934	0.0761671	0.109264	0.036634	-0.0557642	-0.00822735	0.0341949	-0.110501	-0.197529	-0.0426579	0	0.0657024	0.0421023	-0.0382118	0.084774	0.197589	0.274313	0.021131	-0.191829	0.148672	0.126884	0.011838	-0.324332	0.113806
CKM	-0.204914	0.28754	-0.209879	-0.0829263	-0.244049	-0.021915	0.035594	-0.0391126	0.172981	-0.109437	-0.199769	-0.124627	-0.29812	-0.141199	0.0103436	-0.109031	0.0368609	0.0670381	-0.0544758	0.339512	-0.0577435	0.0297785	0.216555	0.00344038	0.130456	0.153318	0.214872	0.107361	0.14211	0.235259	0.179728	-0.0184851	0.0889473	0.0408483	-0.155644	-0.0786715	-0.170547	0.040216	0.112134	-0.0419483	0.0557265	0.019321	0.0337987	-0.017066	-0.213	-0.0585785	0.128823	0.21311	-0.0627337
CKMT2	-0.0956564	0.421284	0.232834	0.0556846	-0.0676827	0.220243	-0.0489445	0.00993204	0.158898	0.134822	0.0765586	0.0644016	-0.0823312	0.552791	0.116035	-0.0912151	0.136231	0.00351858	-0.014132	0.0253339	-0.113937	-0.174725	0.131435	-0.187865	0.103123	-0.258558	-0.0965142	-0.0190811	-0.0572023	0.105583	-0.0931687	-0.016439	0.0356636	-0.0655332	-0.0442615	0.0678167	-0.0710216	-0.245651	0.0589247	0.0132866	0.140123	-0.1156	0.135838	0.0837574	-0.04252	-0.257589	0.0593958	0.071187	0.0955353
ERCC8	-0.210304	-0.276037	-0.0979557	-0.0791936	0.286242	-0.251247	-0.0558882	0.0956516	0.215677	0.10188	-0.00678348	-0.124819	0.0641227	0.0155611	-0.115869	-0.0307417	-0.0632944	-0.00747395	-0.198048	0.0406761	-0.117306	0.0583324	0.0155592	0.0472579	0.0504241	-0.0986314	-0.114194	0.112825	-0.0575485	-0.0966711	-0.0280056	-0.0727129	-0.0576286	-0.190507	0.0765104	0.0465064	-0.10835	-0.0240569	0.09624	-0.0860548	0.160747	0.0132575	-0.0352511	-0.0998073	-0.0382242	0.118797	-0.0688786	-0.00747395	-0.0841494
CKS1B	-0.157489	0.113744	-0.274381	0.0931444	0.0669308	0.296085	0.109309	0.291382	0.188005	0.133562	0.267462	0.23423	0.107409	-0.264073	-0.0506153	0.0348577	-0.025794	0.137276	-0.0182934	-0.161937	-0.0188303	0.0129223	-0.0389433	0.0461264	-0.090394	-0.117826	-0.313848	-0.167685	-0.220854	-0.269274	0.0803661	-0.690839	-0.397125	-0.066371	-0.306342	0.0121117	-0.111082	-0.036027	0.410673	-0.165021	-0.197623	0.175941	0.0439968	0.041729	0.157659	-0.0359735	0.192492	0.127638	-0.480963
CKS2	-0.129066	0.178206	-0.18903	-0.161254	0.199735	0.391064	0.154472	-0.139292	0.159644	-0.170023	0.281505	-0.274506	-0.300101	-0.194405	0.0937791	0.137545	-0.198205	0.00019	0.238172	-0.358363	0.096849	-0.0267129	0.030376	0.058609	-0.0530081	-0.157656	-0.0257363	0.282936	-0.159306	-0.0444598	0.0038147	-0.333154	0.369102	0.0944247	0.172201	0.261365	0.293774	0.109348	-0.169497	0.348501	0.326184	-0.0267897	0.223598	0.0656609	0.0828123	-0.366025	0.0155029	-0.104646	0.198718
AP2M1	0.0579233	-0.0313826	-0.169018	0.0519123	0.137021	-0.205234	0.11393	0.0914888	-0.18201	0.0744724	0.0495319	0.000176	0.00907421	-0.0676212	-0.056591	-0.0122786	0.0862675	-0.063283	0.03508	-0.124761	0.300631	-0.218152	-0.449988	0.110991	-0.0679445	0.112348	-0.0703421	0.085351	-0.076642	-0.0839539	-0.453325	-0.183044	-0.192425	-0.159351	-0.124232	0.104652	0.030982	0.0970736	-0.0795212	0.0817223	0.144839	-0.0523376	0.0579958	-0.102192	0.124586	0.0598526	-0.0722008	-0.0784826	0.025918
AP1S1	0.16506	0.0151138	0.126484	0.0488248	-0.0898275	0.166031	-0.17689	-0.307433	-0.238305	-0.336405	-0.151364	-0.333606	-0.488698	-0.170381	-0.212464	-0.335659	-0.107948	-0.0409212	-0.0741744	0	0.139263	-0.257383	0.100595	0.0928936	0.0219884	0.168579	0.170423	0.306048	0.255386	0.0479965	-0.135425	0.0576081	-0.134109	0.178309	0.129884	0.332311	-0.0420413	-0.0259581	0.0120516	-0.124215	-0.0829401	-0.108857	-0.0905962	0.12461	-0.0129294	0.27529	0.04182	0.171558	0.29292
[truncated: 19,120 more rows]
[truncated: 18 more columns]

## Sheet: Additional Table S2
	Age	BMI	Cholesterol	HDL-C	LDL-C	Triglycerides
GSM1627740	14.33	45.37	160	40	97	116
[truncated: 66 more rows]

## Sheet: Additional Table S3
Gene Symbol	Gene ID
[truncated: 139 more rows]

[truncated: 2 more sheets: Additional Table S4, Additional Table S5]
